# Supplementary material for: Mastitomics, the integrated omics of bovine milk in an experimental model of Streptococcus uberis mastitis: 3. Untargeted metabolomics
Source: Royal Society of Chemistry journal article supplement (doi:10.1039/c6mb00289g), 2016-07-14

# Samples from 0-hour time-point

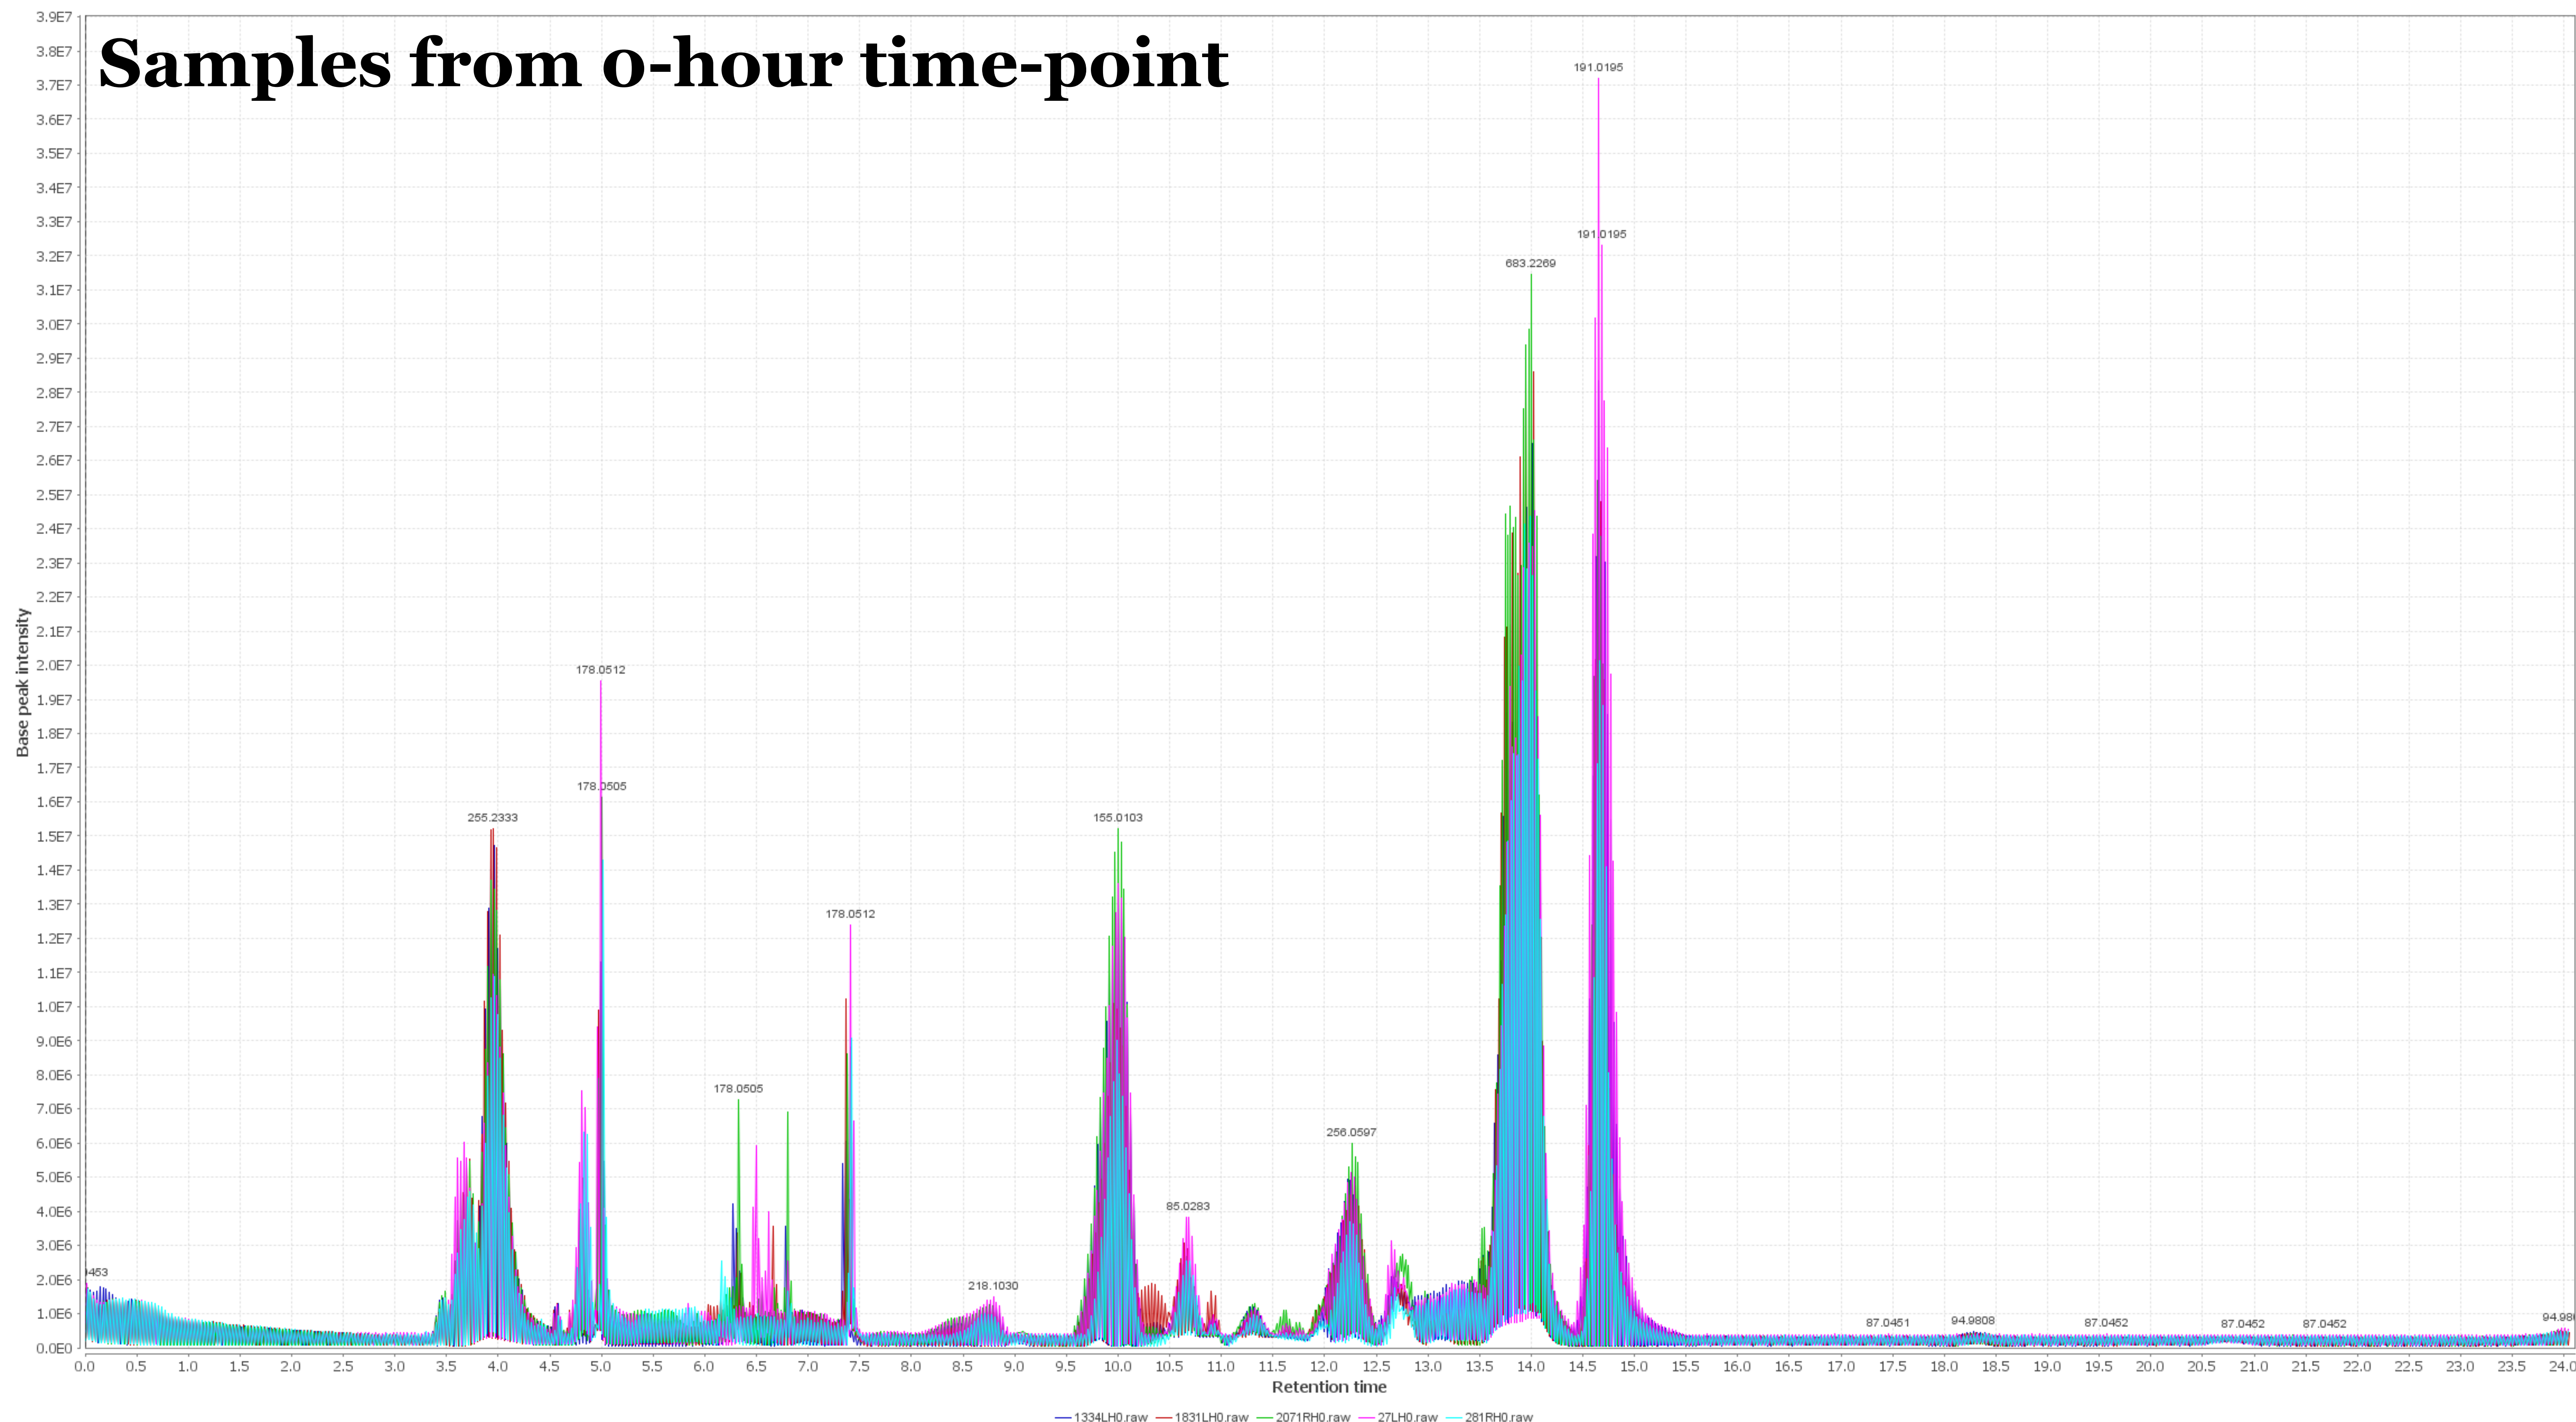

# Samples from 36-hour time-point

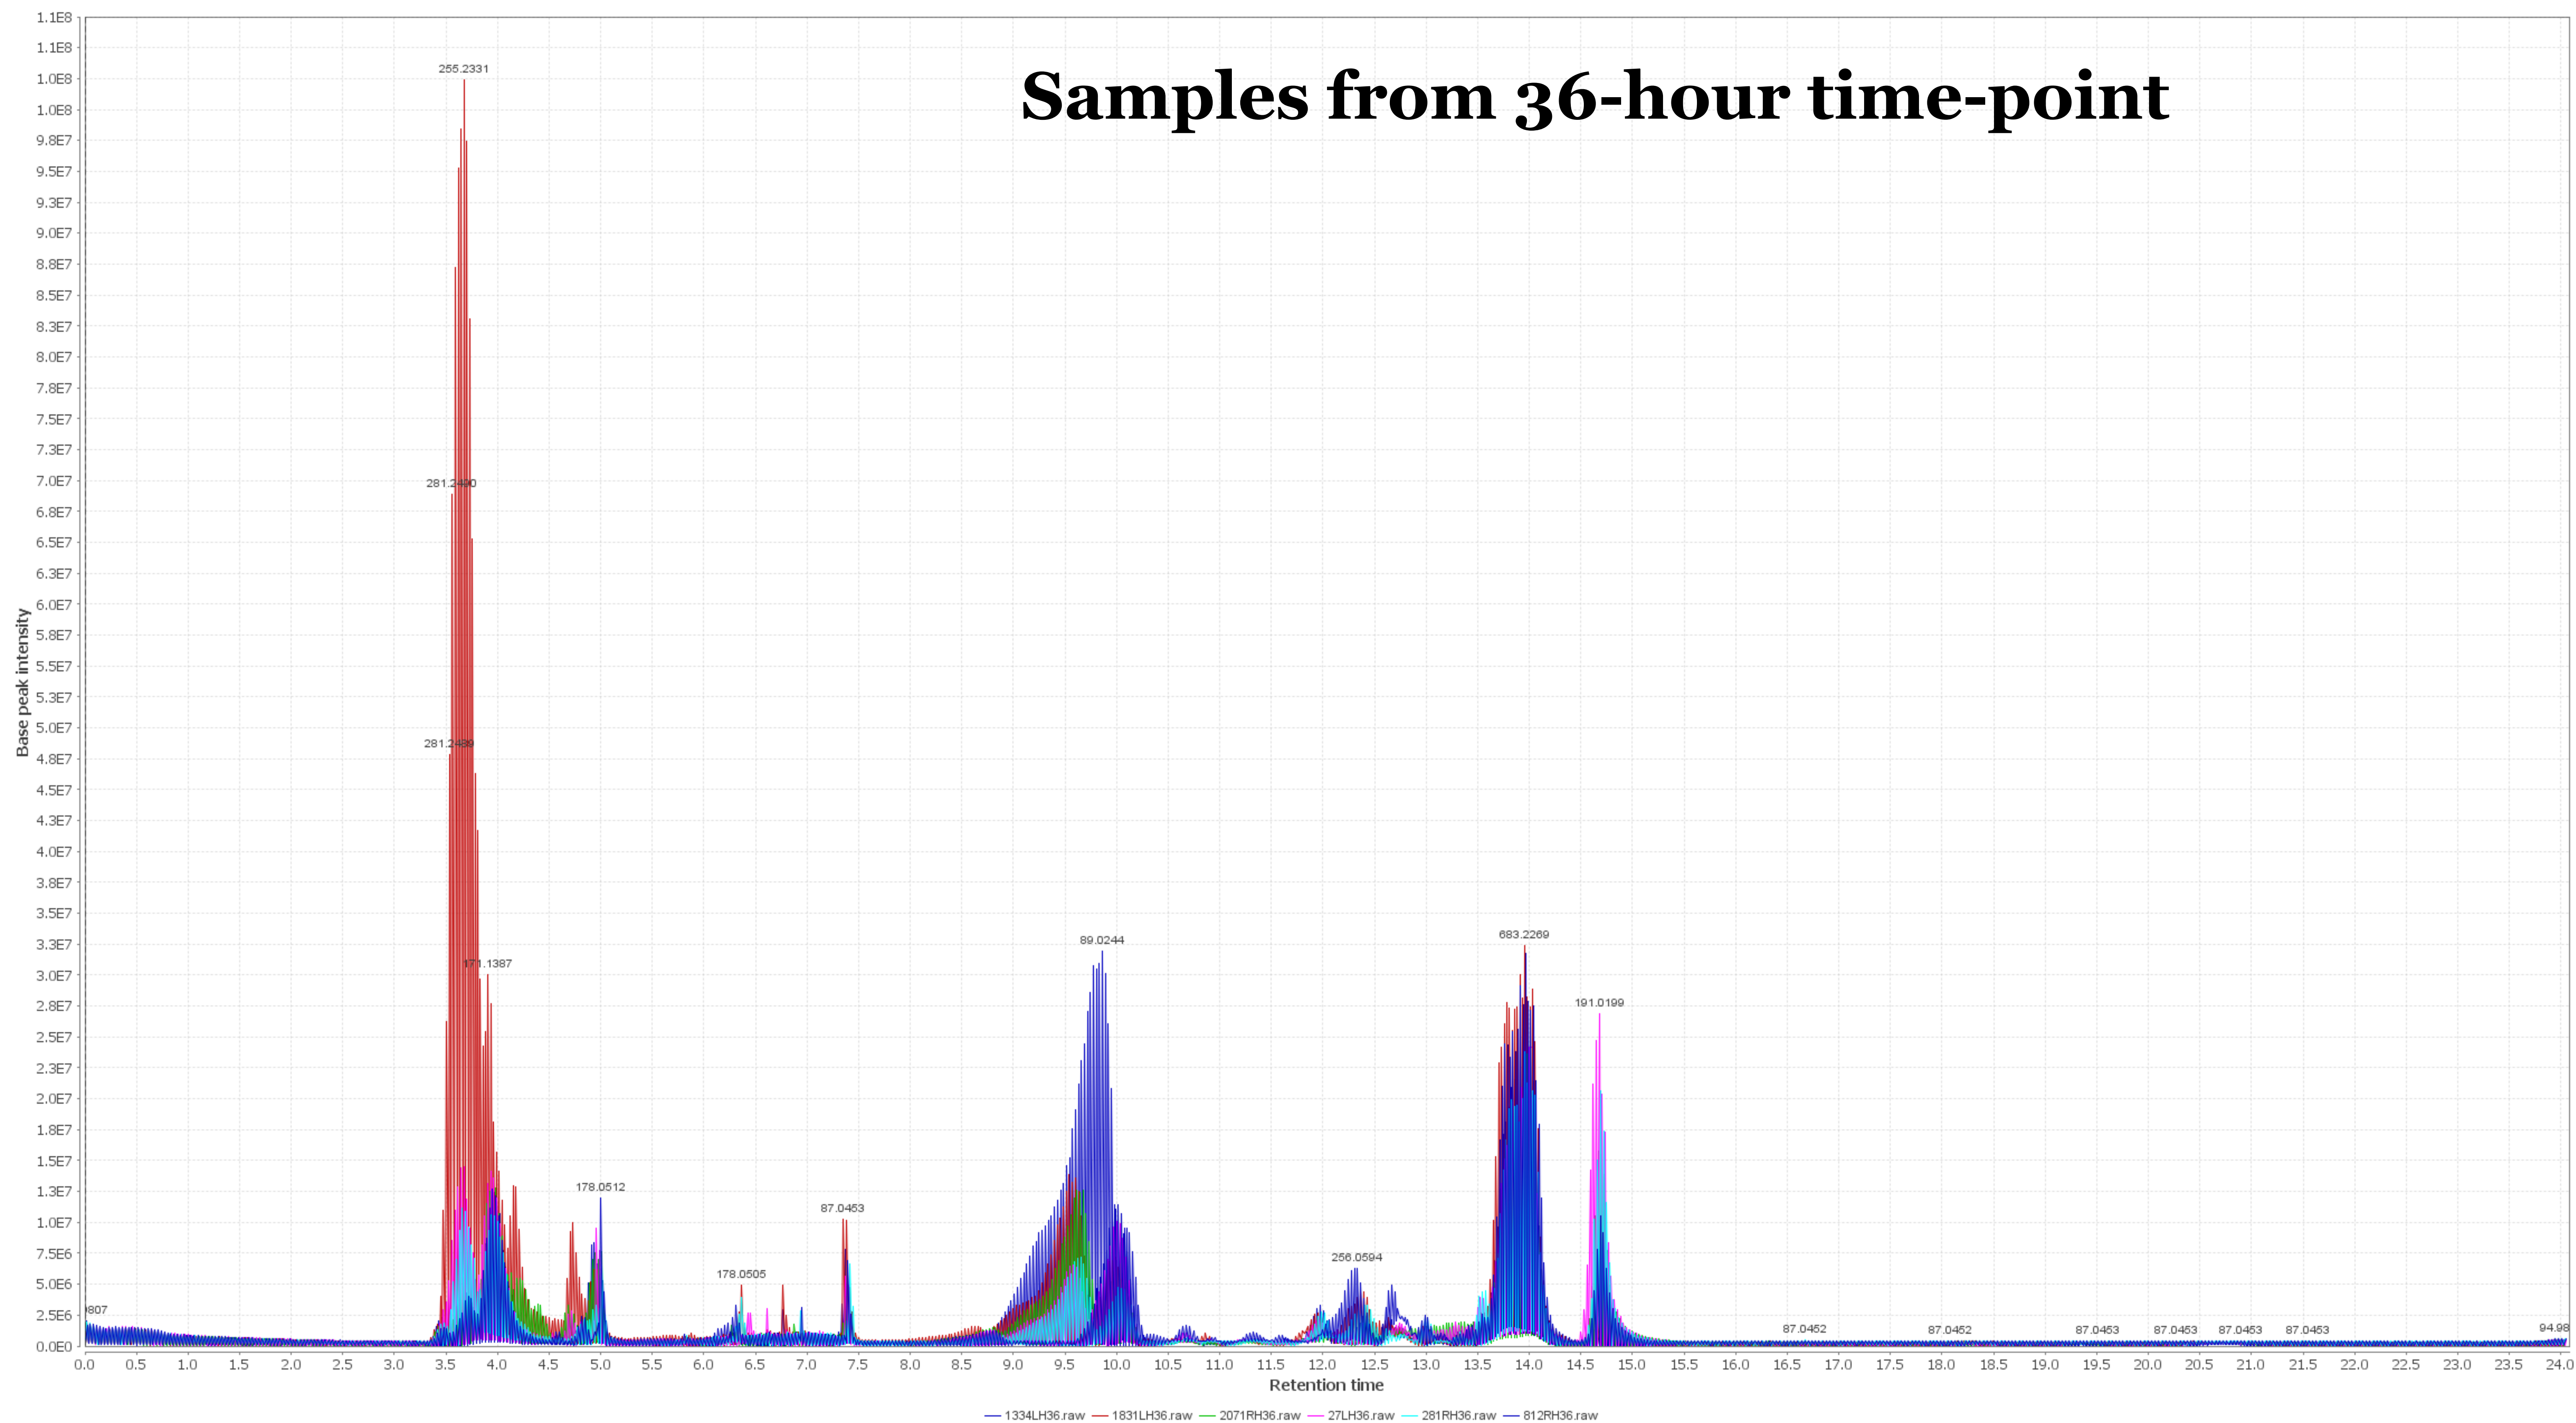



# Samples from 42-hour time-point

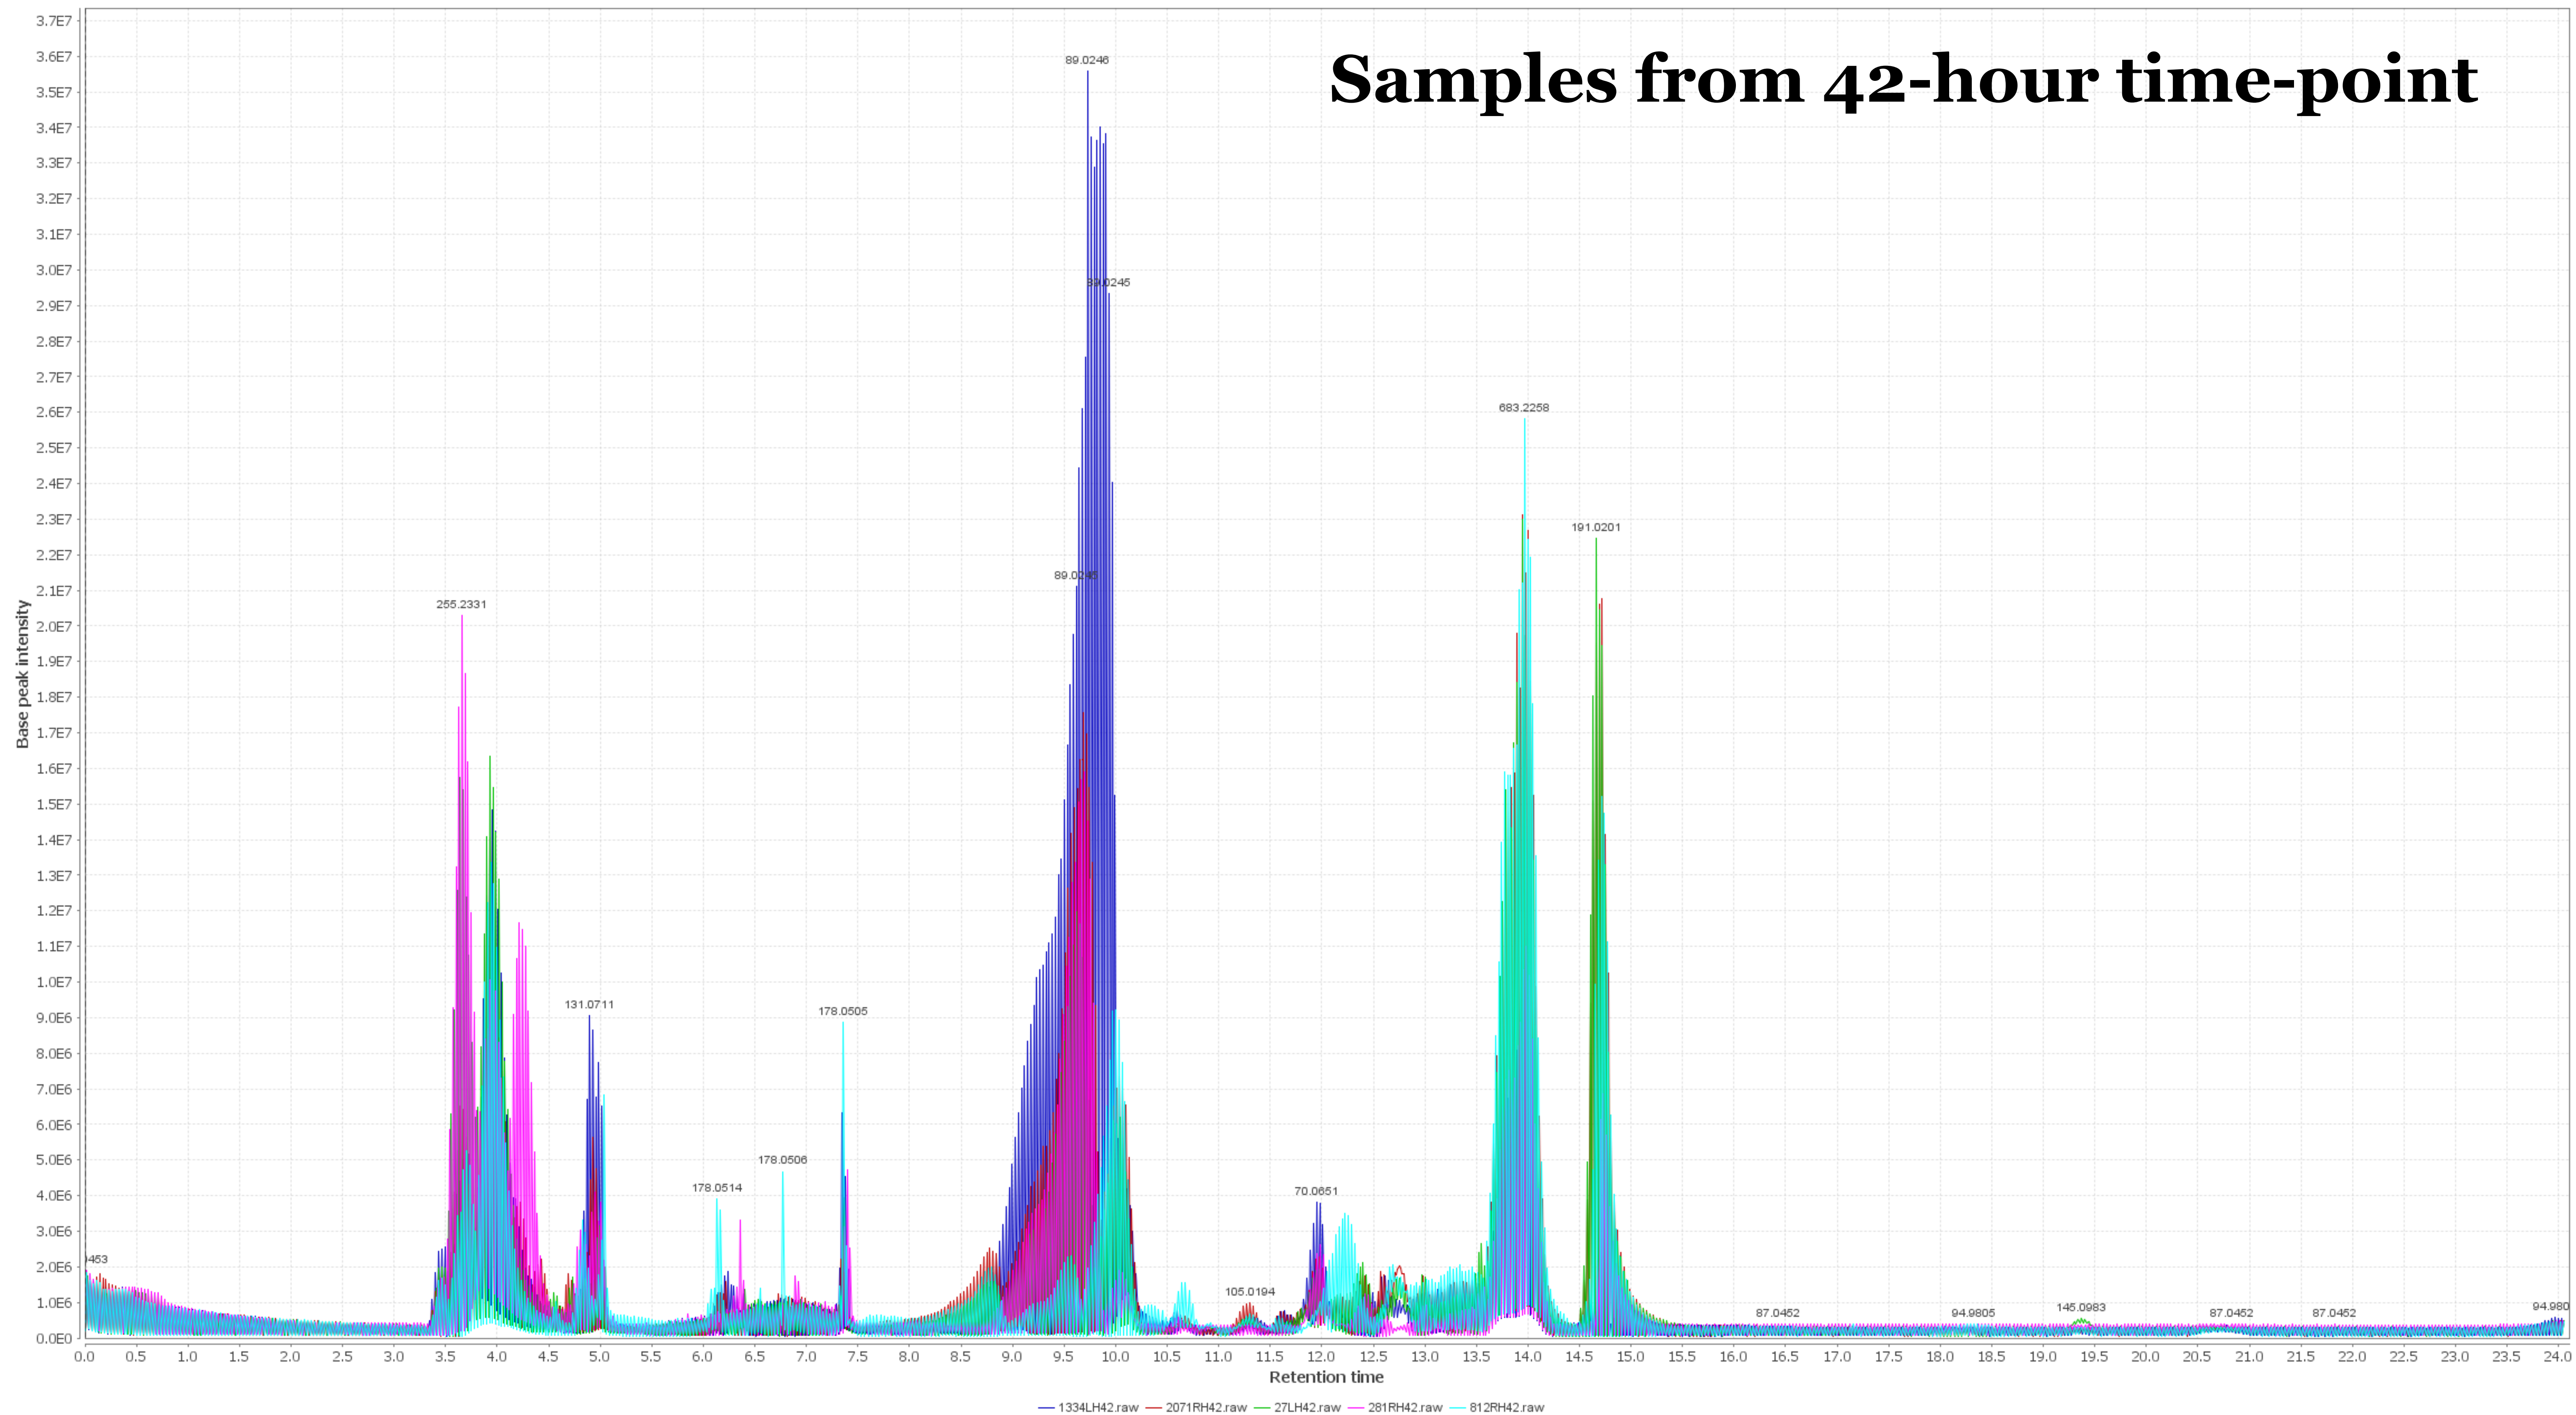



# Samples from 57-hour time-point

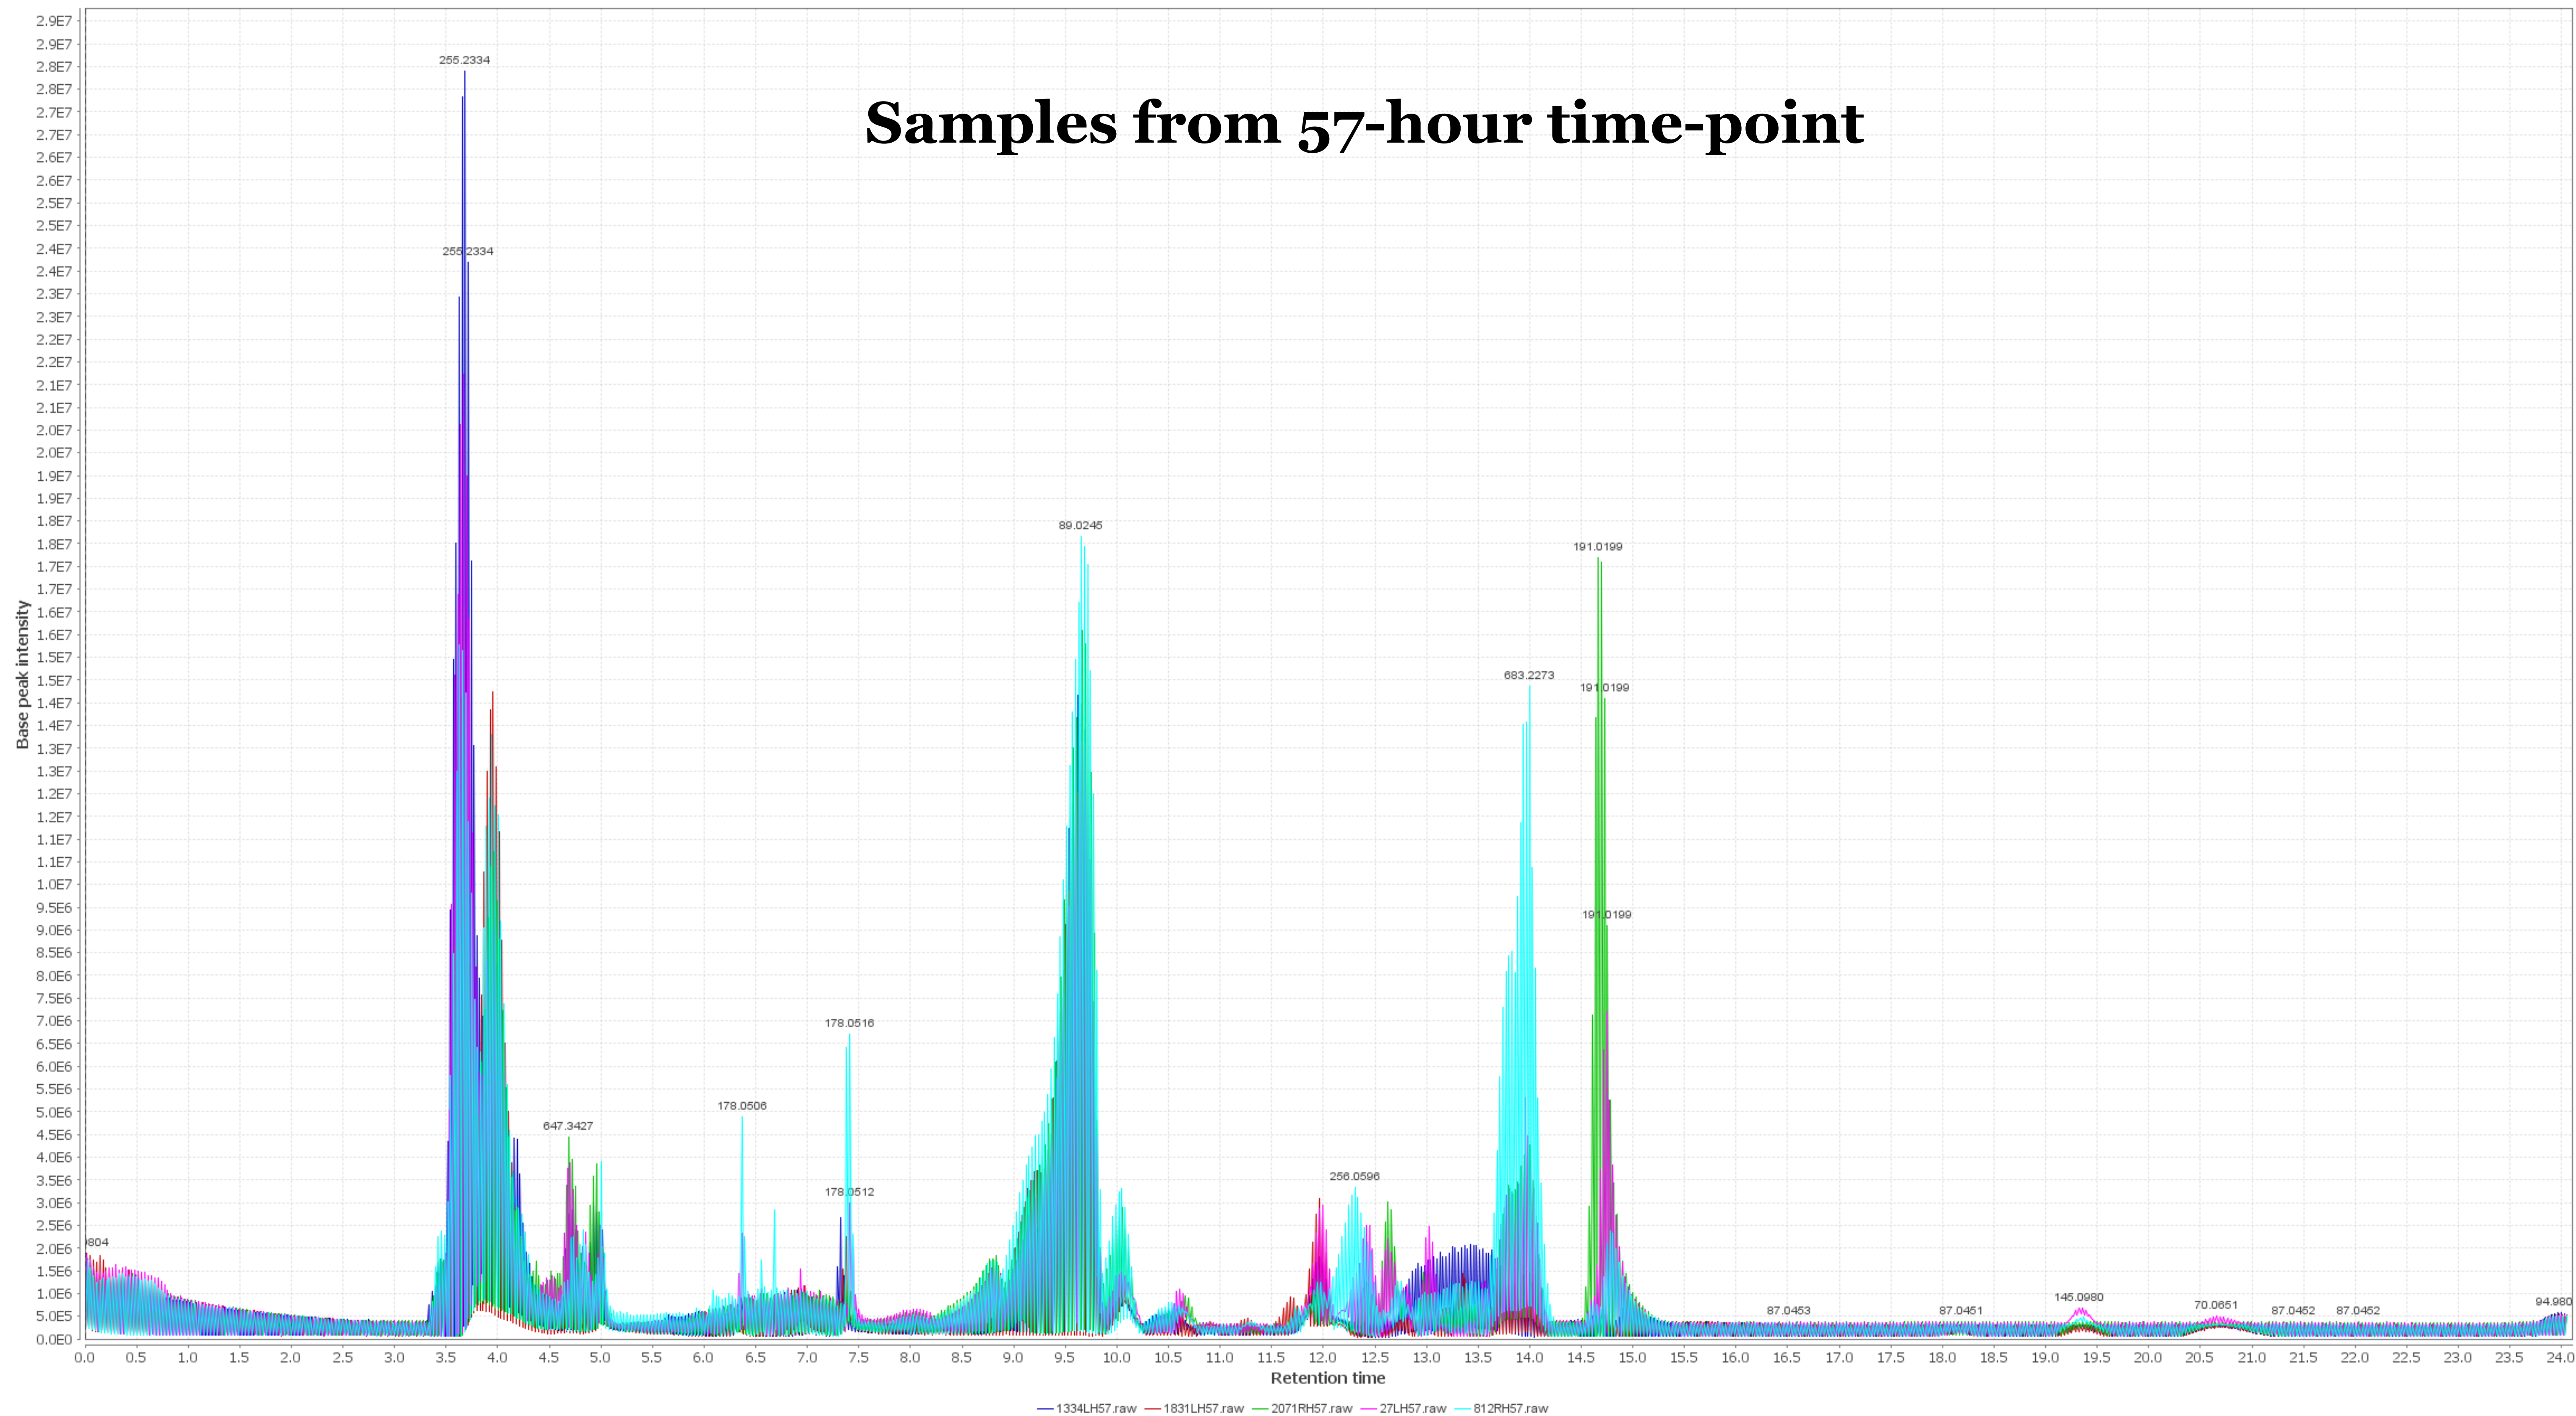



# Samples from 81-hour time-point

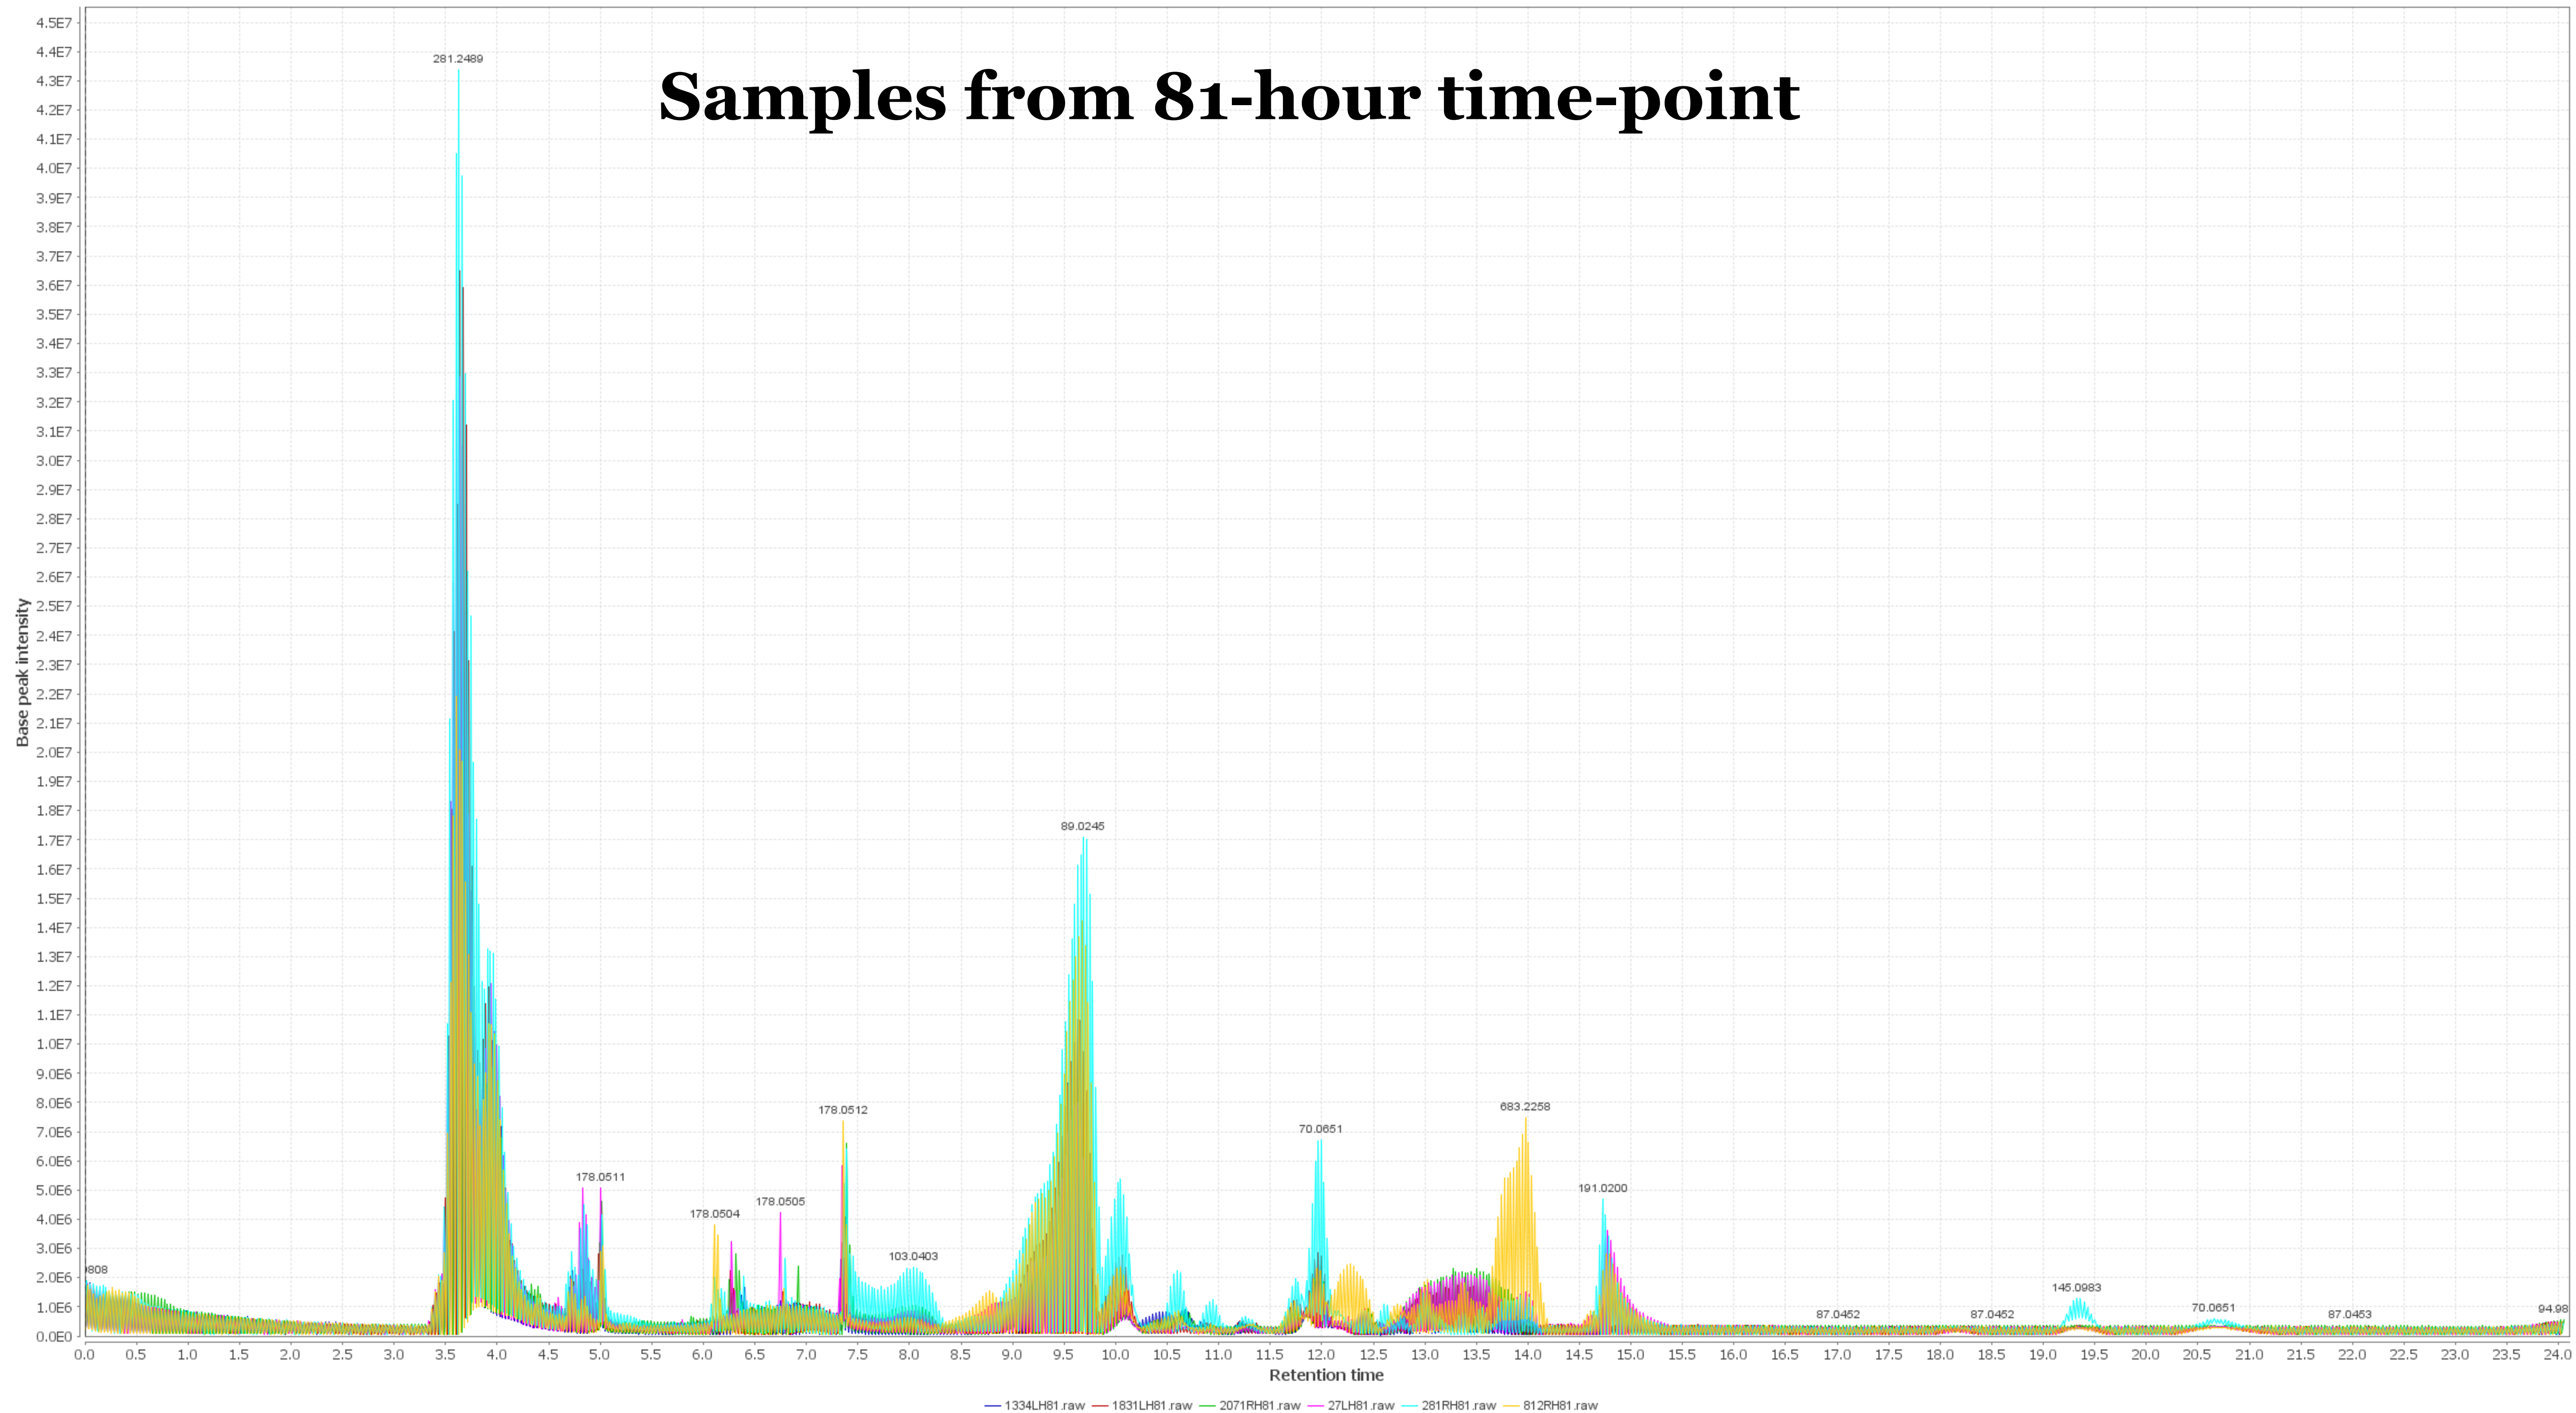



# Samples from 312-hour time-point

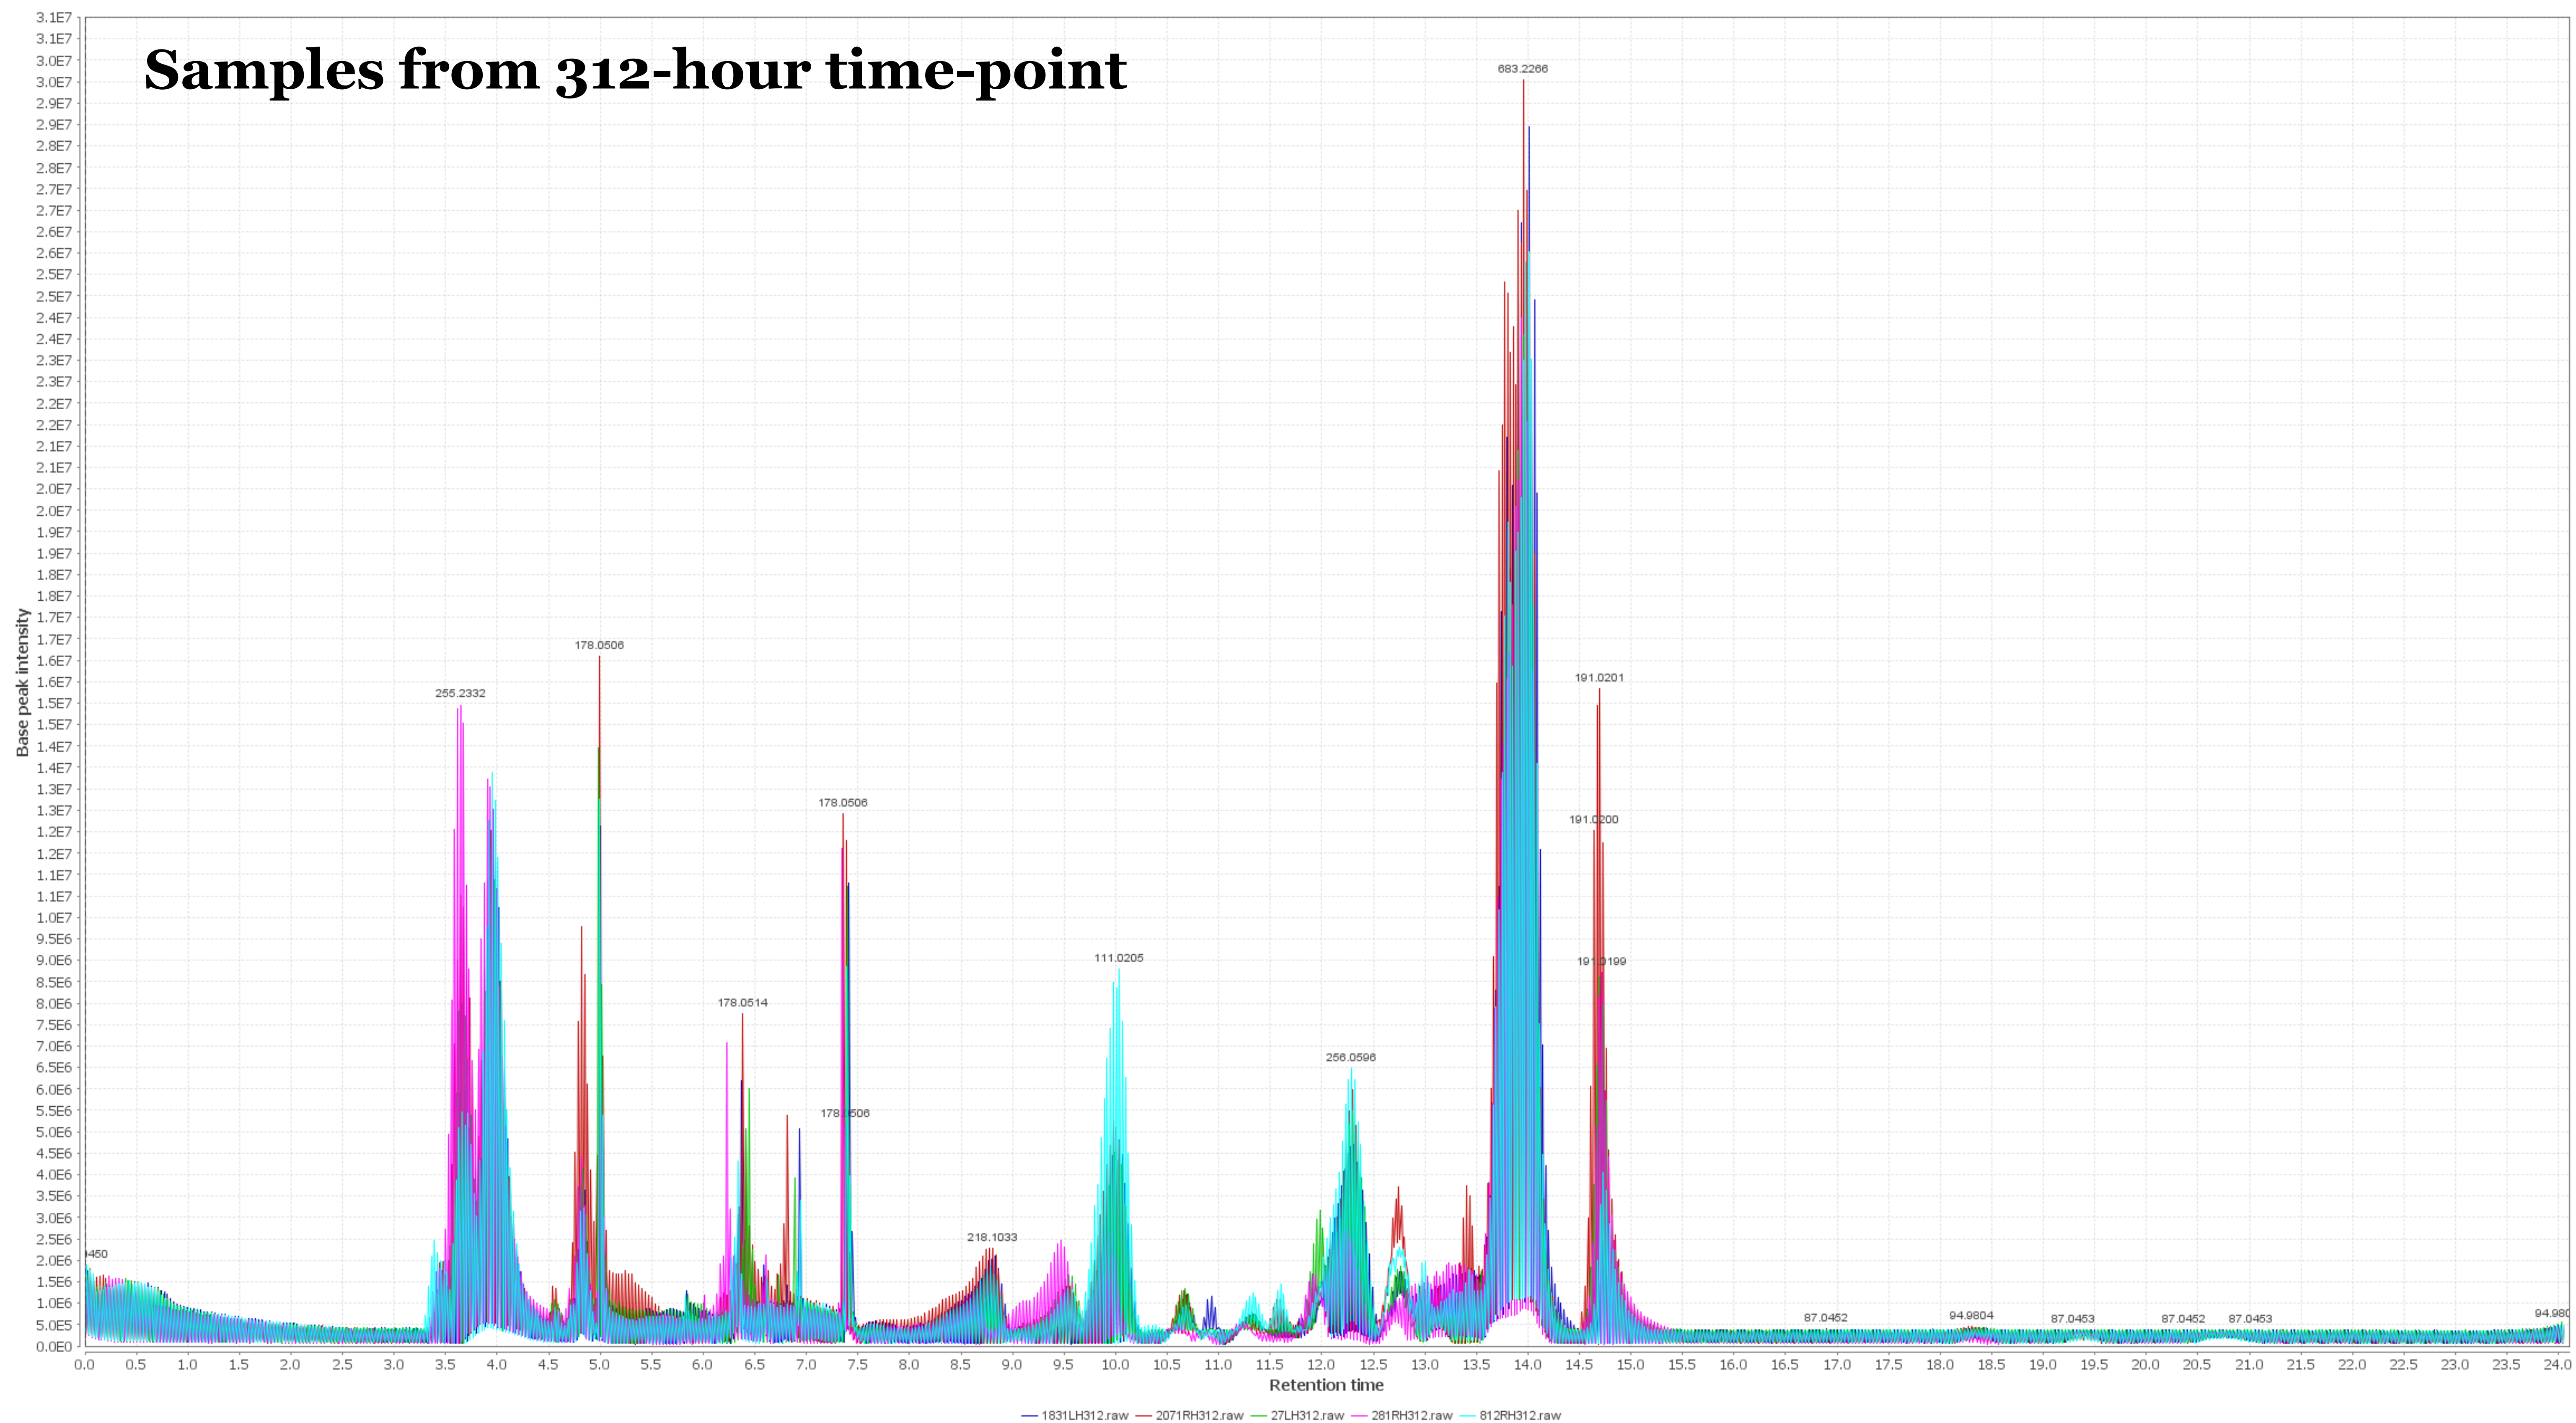



# Samples from all the time-points

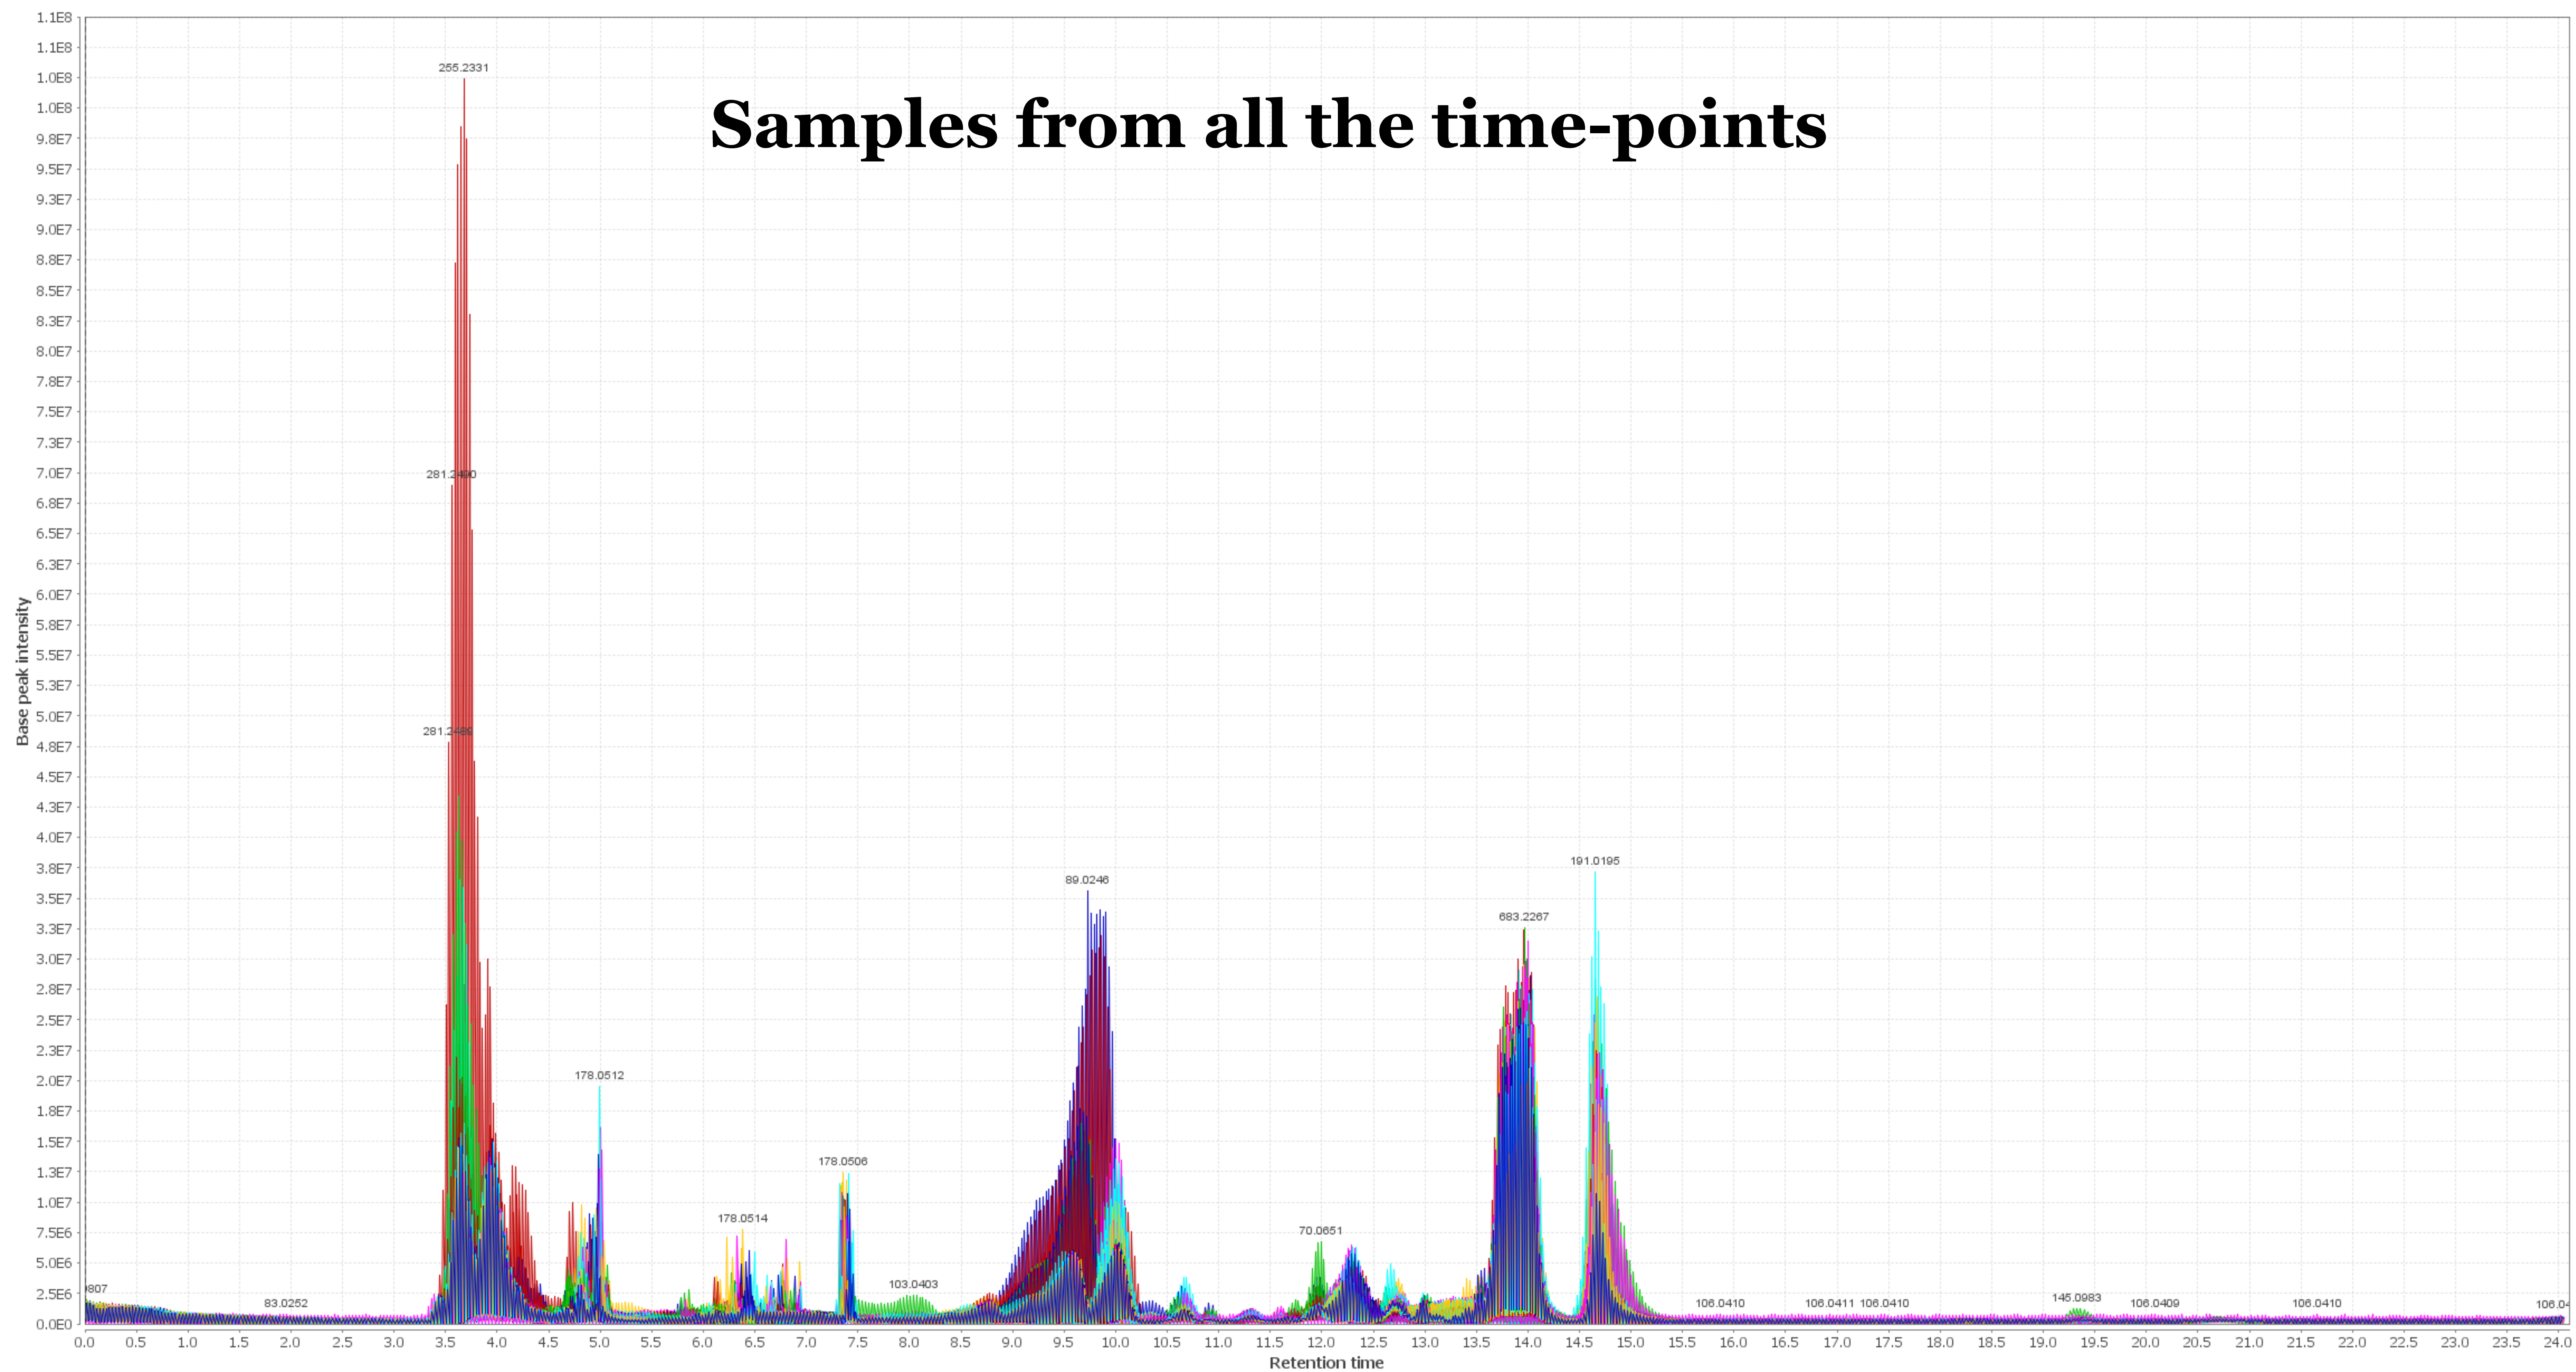

Supplement: c6mb00289g1.zip [file Figure_S1_basePeak_chromatograms.pdf › Figure_S1_basePeak_chromatograms.pdf]
