# Supplementary material for: Mastitomics, the integrated omics of bovine milk in an experimental model of Streptococcus uberis mastitis: 3. Untargeted metabolomics
Source: Royal Society of Chemistry journal article supplement (doi:10.1039/c6mb00289g), 2016-07-14
Supplement: c6mb00289g1.zip [file Table_S2_ANOVA_table_all_Identified_Peaks_log2Plus10_diffEX_lists.xlsx]

## Sheet: ANOVA
Putative Metabolites	Mass	RT	FORMULA	Map	Pathway	BP	p-value(Time)	FDR-stepup(p-value(Time))	p-value(H36 vs. H0)	FDR-stepup(p-value(H36 vs. H0))	Ratio(H36 vs. H0)	Fold-Change(H36 vs. H0)	Fold-Change(H36 vs. H0) (Description)	p-value(H42 vs. H0)	FDR-stepup(p-value(H42 vs. H0))	Ratio(H42 vs. H0)	Fold-Change(H42 vs. H0)	Fold-Change(H42 vs. H0) (Description)	p-value(H57 vs. H0)	FDR-stepup(p-value(H57 vs. H0))	Ratio(H57 vs. H0)	Fold-Change(H57 vs. H0)	Fold-Change(H57 vs. H0) (Description)	p-value(H81 vs. H0)	FDR-stepup(p-value(H81 vs. H0))	Ratio(H81 vs. H0)	Fold-Change(H81 vs. H0)	Fold-Change(H81 vs. H0) (Description)	p-value(H312 vs. H0)	FDR-stepup(p-value(H312 vs. H0))	Ratio(H312 vs. H0)	Fold-Change(H312 vs. H0)	Fold-Change(H312 vs. H0) (Description)	F(Time)	SS(Time)	SS(Error)	F(Error)
Cholesterolsulfate	466.312	3.43229	C27H46O4S	Lipids: Sterol lipids	0	Cholesterolsulfate	1.60072e-07	1.08284e-06	0.000170325	0.00136656	2.57981	2.57981	H36 up vs H0	8.49248e-05	0.000552812	2.85597	2.85597	H42 up vs H0	1.39397e-06	7.88394e-06	4.07311	4.07311	H57 up vs H0	3.232e-09	5.71815e-08	6.61333	6.61333	H81 up vs H0	8.4498e-07	4.85863e-05	4.25785	4.25785	H312 up vs H0	17.1972	22.7989	6.8938	1
1,4-Bis(2-ethylhexyl) sulfosuccinate	422.234	3.46461	C20H38O7S	0	0	1,4-Bis(2-ethylhexyl) sulfosuccinate	0.165701	0.185306	0.107421	0.209379	0.542243	-1.84419	H36 down vs H0	0.303622	0.402109	1.4953	1.4953	H42 up vs H0	0.963147	0.965946	1.01805	1.01805	H57 up vs H0	0.708646	0.753414	1.14874	1.14874	H81 up vs H0	0.886733	1	0.946348	-1.05669	H312 down vs H0	1.7184	6.57069	19.8834	1
[FA hydroxy(24:0)] 2-hydroxy-tetracosanoic acid	384.361	3.46471	C24H48O3	Lipids: Fatty Acyls	Fatty Acids and Conjugates	Ala-Leu-Gln-Arg	0.0517224	0.0638434	0.280226	0.417731	0.851419	-1.17451	H36 down vs H0	0.0888965	0.153731	0.763948	-1.30899	H42 down vs H0	0.485076	0.527091	0.897715	-1.11394	H57 down vs H0	0.179689	0.216758	1.22277	1.22277	H81 up vs H0	0.918962	1	1.01577	1.01577	H312 up vs H0	2.56187	1.54694	3.13992	1
17beta-Hydroxy-4-mercaptoandrost-4-en-3-one 4-acetate 17-propionate	418.218	3.47644	C24H34O4S	0	0	17beta-Hydroxy-4-mercaptoandrost-4-en-3	0.447071	0.466685	0.220086	0.354811	0.206587	-4.84057	H36 down vs H0	0.855324	0.891501	0.785533	-1.27302	H42 down vs H0	0.265212	0.307557	0.224774	-4.44891	H57 down vs H0	0.138099	0.169854	0.14658	-6.82222	H81 down vs H0	0.992967	1	1.01173	1.01173	H312 up vs H0	0.98263	43.9291	232.469	1
1-20:0-2-18:3-phosphatidylserine	813.552	3.49645	C44H80NO10P	0	0	[PS (18:1/18:1)] 1,2-di-(9E-octadecenoy	6.73561e-06	2.2561e-05	0.412894	0.547878	1.24776	1.24776	H36 up vs H0	0.199668	0.290045	1.44139	1.44139	H42 up vs H0	0.00241544	0.00446824	2.54345	2.54345	H57 up vs H0	7.8826e-07	3.83028e-06	5.55355	5.55355	H81 up vs H0	0.00370526	0.0232421	2.42513	2.42513	H312 up vs H0	11.4043	22.9014	10.4423	1
[PS (18:1/18:1)] 1,2-di-(9E-octadecenoyl)-sn-glycero-3-phosphoserine	787.536	3.49799	C42H78NO10P	Lipids: Glycerophospholipids	Glycerophosphoserines	[PS (18:1/18:1)] 1,2-di-(9E-octadecenoy	4.29459e-06	1.53537e-05	0.280289	0.417731	1.28246	1.28246	H36 up vs H0	0.139295	0.217451	1.43249	1.43249	H42 up vs H0	0.00144802	0.00284653	2.31508	2.31508	H57 up vs H0	4.22761e-07	2.41079e-06	4.52671	4.52671	H81 up vs H0	0.001131	0.00951693	2.36837	2.36837	H312 up vs H0	12.018	17.364	7.51316	1
sodium dodecyl sulfate	266.155	3.50055	C12H26O4S	0	0	sodium dodecyl sulfate	0.779	0.784686	0.335987	0.481223	1.74187	1.74187	H36 up vs H0	0.433463	0.527494	1.60071	1.60071	H42 up vs H0	0.874771	0.886331	1.09868	1.09868	H57 up vs H0	0.32803	0.377864	1.75829	1.75829	H81 up vs H0	0.96334	1	0.972932	-1.02782	H312 down vs H0	0.492242	4.47775	47.3026	1
Tetracosanoic acid	368.365	3.50065	C24H48O2	Lipid Metabolism	Biosynthesis of unsaturated fatty acids	Tetracosanoic acid	0.00013503	0.000279134	0.84677	0.920112	1.03735	1.03735	H36 up vs H0	0.961984	0.980456	0.990602	-1.00949	H42 down vs H0	0.539633	0.580885	1.1297	1.1297	H57 up vs H0	6.05847e-05	0.000141707	2.45303	2.45303	H81 up vs H0	0.941344	1	0.985529	-1.01468	H312 down vs H0	7.80269	7.81489	5.20813	1
PS(18:0/18:1(9Z))	789.552	3.50077	C42H80NO10P	Lipids: Glycerophospholipids	Glycerophosphoserines	[PS (18:1/18:1)] 1,2-di-(9E-octadecenoy	0.000250233	0.000494729	0.485034	0.605196	1.1865	1.1865	H36 up vs H0	0.241536	0.337368	1.35284	1.35284	H42 up vs H0	0.0201319	0.0292442	1.86686	1.86686	H57 up vs H0	3.61941e-05	8.95122e-05	3.32111	3.32111	H81 up vs H0	0.00236524	0.0166532	2.33818	2.33818	H312 up vs H0	7.15529	11.8363	8.60183	1
[FA hydroxy(26:0)] 2-hydroxy-hexacosanoic acid	412.392	3.50423	C26H52O3	Lipids: Fatty Acyls	Fatty Acids and Conjugates	Tetracosanoic acid	0.0249474	0.0326636	0.360135	0.497982	0.861685	-1.16052	H36 down vs H0	0.593104	0.677553	0.913657	-1.0945	H42 down vs H0	0.546407	0.58726	0.903024	-1.10739	H57 down vs H0	0.026624	0.0363054	1.45584	1.45584	H81 up vs H0	0.785888	0.966992	0.955221	-1.04688	H312 down vs H0	3.10637	2.25149	3.76895	1
[PI (18:0/20:4)] 1-octadecanoyl-2-(5Z,8Z,11Z,14Z-eicosatetraenoyl)-sn-glycero-3-phospho-(1'-myo-inositol)	886.558	3.50504	C47H83O13P	Lipids: Glycerophospholipids	Glycerophosphoinositols	[PS (18:1/18:1)] 1,2-di-(9E-octadecenoy	3.32774e-06	1.27226e-05	0.187799	0.310986	1.37489	1.37489	H36 up vs H0	0.300737	0.400566	1.29636	1.29636	H42 up vs H0	0.0166616	0.0246706	1.87589	1.87589	H57 up vs H0	5.6653e-07	3.078e-06	4.70085	4.70085	H81 up vs H0	0.78987	0.966992	1.06843	1.06843	H312 up vs H0	12.3751	19.4563	8.17551	1
PI(16:0/22:3(10Z,13Z,16Z))	888.573	3.50569	C47H85O13P	Lipids: Glycerophospholipids	Glycerophosphoinositols	[PS (18:1/18:1)] 1,2-di-(9E-octadecenoy	3.32041e-07	1.98439e-06	0.16284	0.280899	1.42948	1.42948	H36 up vs H0	0.315336	0.414441	1.30478	1.30478	H42 up vs H0	0.00544182	0.0091359	2.19872	2.19872	H57 up vs H0	1.94289e-07	1.30155e-06	5.71228	5.71228	H81 up vs H0	0.550526	0.822214	0.854568	-1.17018	H312 down vs H0	15.9344	27.9891	9.13389	1
[PS (18:1/18:2)] 1-(9Z-octadecenoyl)-2-(9Z,12Z-octadecadienoyl)-sn-glycero-3-phosphoserine	785.521	3.50781	C42H76NO10P	Lipids: Glycerophospholipids	Glycerophosphoserines	Ala-Leu-Gln-Arg	0.000253408	0.000499575	0.194679	0.31983	1.32402	1.32402	H36 up vs H0	0.133426	0.211642	1.40657	1.40657	H42 up vs H0	0.00766679	0.0125358	1.88987	1.88987	H57 up vs H0	1.00509e-05	2.95112e-05	3.16126	3.16126	H81 up vs H0	0.0137064	0.0634724	1.79004	1.79004	H312 up vs H0	7.14236	9.01155	6.56087	1
[PI (18:0/18:0)] 1,2-di-(9Z-octadecenoyl)-sn-glycero-3-phospho-(1'-myo-inositol)	862.557	3.51554	C45H83O13P	Lipids: Glycerophospholipids	Glycerophosphoinositols	[PS (18:1/18:1)] 1,2-di-(9E-octadecenoy	9.11354e-05	0.00019837	0.161739	0.280401	1.33427	1.33427	H36 up vs H0	0.297738	0.398138	1.24886	1.24886	H42 up vs H0	0.00396143	0.00686781	1.93715	1.93715	H57 up vs H0	5.38065e-06	1.81105e-05	3.12984	3.12984	H81 up vs H0	0.0485968	0.158918	1.54151	1.54151	H312 up vs H0	8.23074	9.36616	5.91734	1
[ST hydroxy(3:0)] (7E)-(1R,2S,3R)-2-(3-hydroxypropoxy)-19-nor-9,10-seco-5,7-cholestadiene-1,3,25-triol	478.366	3.51683	C29H50O5	Lipids: Sterol lipids	Secosteroids	Ala-Leu-Gln-Arg	7.6344e-05	0.000169927	0.950829	0.995155	1.00745	1.00745	H36 up vs H0	0.898384	0.930758	1.01618	1.01618	H42 up vs H0	0.0333553	0.0462593	1.32277	1.32277	H57 up vs H0	2.87869e-05	7.2758e-05	1.82753	1.82753	H81 up vs H0	0.0306326	0.112802	1.32926	1.32926	H312 up vs H0	8.42762	3.3983	2.09682	1
[PS (16:0/18:1)] 1-hexadecanoyl-2-(9Z-octadecenoyl)-sn-glycero-3-phosphoserine	761.521	3.51762	C40H76NO10P	Lipids: Glycerophospholipids	Glycerophosphoserines	Ala-Leu-Gln-Arg	0.0343625	0.043665	0.108752	0.211377	1.57358	1.57358	H36 up vs H0	0.0820684	0.144089	1.67476	1.67476	H42 up vs H0	0.00853683	0.0137306	2.25064	2.25064	H57 up vs H0	0.00172187	0.00285599	2.59541	2.59541	H81 up vs H0	0.0968668	0.2706	1.63405	1.63405	H312 up vs H0	2.86504	6.05862	10.9963	1
1-18:0-2-18:1-phosphatidylinositol	864.573	3.5203	C45H85O13P	0	0	Ala-Leu-Gln-Arg	0.00718999	0.0104225	0.355243	0.496572	1.17678	1.17678	H36 up vs H0	0.459265	0.547311	1.14533	1.14533	H42 up vs H0	0.119902	0.148799	1.33705	1.33705	H57 up vs H0	0.000793287	0.0014329	1.92815	1.92815	H81 up vs H0	0.914408	1	1.0198	1.0198	H312 up vs H0	4.0847	3.46747	4.41425	1
PI(16:0/20:3(5Z,8Z,11Z))	860.542	3.52532	C45H81O13P	Lipids: Glycerophospholipids	Glycerophosphoinositols	Ala-Leu-Gln-Arg	5.72203e-05	0.000133544	0.0508839	0.120239	1.44651	1.44651	H36 up vs H0	0.0839883	0.146343	1.40276	1.40276	H42 up vs H0	0.00177764	0.00341267	1.9266	1.9266	H57 up vs H0	2.43635e-06	9.20303e-06	2.95276	2.95276	H81 up vs H0	0.000519219	0.00526854	2.10819	2.10819	H312 up vs H0	8.75372	8.07976	4.79965	1
[FA oxo(21:0)] 2-oxo-heneicosanoic acid	340.298	3.52698	C21H40O3	Lipids: Fatty Acyls	Fatty Acids and Conjugates		1.12188e-06	5.30521e-06	0.40438	0.541791	1.14346	1.14346	H36 up vs H0	0.155637	0.237063	1.27324	1.27324	H42 up vs H0	0.00028781	0.00064687	1.99653	1.99653	H57 up vs H0	1.76234e-07	1.21601e-06	3.04697	3.04697	H81 up vs H0	0.0143193	0.0654324	1.54286	1.54286	H312 up vs H0	13.977	9.92338	3.69189	1
PI(16:0/18:2(9Z,12Z))	834.525	3.5322	C43H79O13P	Lipids: Glycerophospholipids	Glycerophosphoinositols	[PS (18:1/18:1)] 1,2-di-(9E-octadecenoy	2.2243e-05	5.97185e-05	0.00602522	0.0223516	2.03768	2.03768	H36 up vs H0	0.0211347	0.0457146	1.8407	1.8407	H42 up vs H0	0.000123626	0.000305741	3.06622	3.06622	H57 up vs H0	2.31433e-06	8.82257e-06	4.1952	4.1952	H81 up vs H0	1.11444e-05	0.000366174	3.84749	3.84749	H312 up vs H0	9.87241	15.8768	8.36266	1
[PI (16:0/18:1)] 1-hexadecanoyl-2-(9Z-octadecenoyl)-sn-glycero-3-phospho-(1'-myo-inositol)	836.541	3.53294	C43H81O13P	Lipids: Glycerophospholipids	Glycerophosphoinositols	[PS (18:1/18:1)] 1,2-di-(9E-octadecenoy	8.31458e-06	2.69345e-05	0.0451755	0.109372	1.56915	1.56915	H36 up vs H0	0.102133	0.173912	1.4607	1.4607	H42 up vs H0	0.000498108	0.00106407	2.43283	2.43283	H57 up vs H0	6.54549e-07	3.36191e-06	4.03783	4.03783	H81 up vs H0	9.92296e-05	0.00163131	2.79104	2.79104	H312 up vs H0	11.1242	14.4732	6.76547	1
[FA (26:0)] hexacosanoic acid	396.397	3.53316	C26H52O2	Lipids: Fatty Acyls	Fatty Acids and Conjugates	Tetracosanoic acid	0.0218871	0.0290425	0.951887	0.995155	1.01195	1.01195	H36 up vs H0	0.785254	0.833717	0.945457	-1.05769	H42 down vs H0	0.751685	0.777606	1.06732	1.06732	H57 up vs H0	0.00630344	0.00958011	1.78538	1.78538	H81 up vs H0	0.955589	1	0.98861	-1.01152	H312 down vs H0	3.20612	3.46198	5.61498	1
[FA trihydroxy(3:2/2:0)] isopropyl 9S,11R,15S-trihydroxy-5Z,13E-prostadienoate	396.288	3.53791	C23H40O5	Lipids: Fatty Acyls	Eicosanoids	Ala-Leu-Gln-Arg	0.224703	0.244937	0.753367	0.856127	1.04238	1.04238	H36 up vs H0	0.124803	0.202374	0.805311	-1.24176	H42 down vs H0	0.478408	0.521488	0.90648	-1.10317	H57 down vs H0	0.577195	0.626138	1.07658	1.07658	H81 up vs H0	0.570133	0.842381	1.08168	1.08168	H312 up vs H0	1.49805	0.726344	2.52126	1
[FA (24:0)] 15Z-tetracosenoic acid	366.35	3.5407	C24H46O2	Lipids: Fatty Acyls	Fatty Acids and Conjugates	[FA (24:0)] 15Z-tetracosenoic acid	1.81736e-07	1.20575e-06	0.426027	0.558856	1.33036	1.33036	H36 up vs H0	0.137561	0.215721	1.75919	1.75919	H42 up vs H0	0.000232012	0.000538232	4.82252	4.82252	H57 up vs H0	3.70651e-08	3.55207e-07	15.0793	15.0793	H81 up vs H0	0.0838094	0.240952	1.94029	1.94029	H312 up vs H0	16.9725	60.0161	18.3876	1
[FA (23:0)] tricosanoic acid	354.35	3.54283	C23H46O2	Lipids: Fatty Acyls	Fatty Acids and Conjugates	[FA (24:0)] 15Z-tetracosenoic acid	4.7205e-05	0.000113489	0.467108	0.591128	1.21546	1.21546	H36 up vs H0	0.998812	1	1.00042	1.00042	H42 up vs H0	0.0255937	0.0365624	1.9231	1.9231	H57 up vs H0	1.69391e-05	4.58351e-05	4.01746	4.01746	H81 up vs H0	0.762978	0.95471	1.0878	1.0878	H312 up vs H0	8.97521	17.8052	10.3159	1
[FA (23:1)] 22-tricosenoic acid	352.334	3.54729	C23H44O2	Lipids: Fatty Acyls	Fatty Acids and Conjugates	[FA (24:0)] 15Z-tetracosenoic acid	0.0120979	0.0169322	0.302002	0.439624	0.262306	-3.81235	H36 down vs H0	0.295658	0.396124	4.12316	4.12316	H42 up vs H0	0.0882452	0.113388	10.4961	10.4961	H57 up vs H0	0.0142819	0.0202768	28.1445	28.1445	H81 up vs H0	0.251851	0.52029	4.73763	4.73763	H312 up vs H0	3.66696	168.081	238.351	1
[FA (18:1)] 9Z-octadecenamide	281.272	3.55665	C18H35NO	Lipids: Fatty Acyls	Fatty amides	[FA (18:1)] 9Z-octadecenamide	2.26545e-09	3.97465e-08	0.76158	0.858644	0.920059	-1.08689	H36 down vs H0	0.301154	0.400566	1.34907	1.34907	H42 up vs H0	7.30186e-05	0.000196042	3.80254	3.80254	H57 up vs H0	5.47059e-09	7.56879e-08	10.0937	10.0937	H81 up vs H0	0.722728	0.937751	1.10716	1.10716	H312 up vs H0	26.1488	54.8012	10.8979	1
[FA (22:0)] 13Z-docosenoic acid	338.319	3.55876	C22H42O2	Lipids: Fatty Acyls	Biosynthesis of unsaturated fatty acids	[FA (24:0)] 15Z-tetracosenoic acid	0.0083789	0.0119699	0.528708	0.652609	0.605588	-1.65129	H36 down vs H0	0.395855	0.500257	2.03047	2.03047	H42 up vs H0	0.0818714	0.106187	4.4146	4.4146	H57 up vs H0	0.00386107	0.00600031	12.0799	12.0799	H81 up vs H0	0.534191	0.810589	1.67674	1.67674	H312 up vs H0	3.96047	69.3517	91.057	1
[GL methyl(15:0/8:0)] 1-(14-methyl-pentadecanoyl)-2-(8-[3]-ladderane-octanyl)-sn-glycerol	602.527	3.56093	C39H70O4	Lipids: Glycerolipids	Diradylglycerols	[FA (18:1)] 9Z-octadecenamide	4.23495e-05	0.000102891	0.41983	0.554329	0.84801	-1.17923	H36 down vs H0	0.725398	0.786989	1.07744	1.07744	H42 up vs H0	0.0305044	0.0430431	1.61715	1.61715	H57 up vs H0	4.43867e-05	0.000107087	2.67623	2.67623	H81 up vs H0	0.0705323	0.213453	1.4861	1.4861	H312 up vs H0	9.10156	10.4493	5.96999	1
Docosanoic acid	340.334	3.56486	C22H44O2	Lipid Metabolism	Biosynthesis of unsaturated fatty acids	[FA (24:0)] 15Z-tetracosenoic acid	5.74819e-05	0.000133544	0.550758	0.673799	1.1697	1.1697	H36 up vs H0	0.405457	0.504082	1.25739	1.25739	H42 up vs H0	0.0948671	0.120107	1.59916	1.59916	H57 up vs H0	8.86423e-06	2.67088e-05	4.1704	4.1704	H81 up vs H0	0.647286	0.893254	1.13357	1.13357	H312 up vs H0	8.7485	16.6964	9.92411	1
Nostocyclopeptide A1	378.208	3.58148	C37H56N8O9	0	0	Nostocyclopeptide A1	0.374223	0.395427	0.123087	0.229898	0.284926	-3.50968	H36 down vs H0	0.778158	0.831159	0.791181	-1.26393	H42 down vs H0	0.997027	0.998474	0.996909	-1.0031	H57 down vs H0	0.610892	0.659648	1.5004	1.5004	H81 up vs H0	0.997372	1	0.997267	-1.00274	H312 down vs H0	1.12018	19.7318	91.5974	1
Taxa-4(20),11(12)-dien-5alpha-yl acetate	330.256	3.58247	C22H34O2	Biosynthesis of Secondary Metabolites	Diterpenoid biosynthesis	Taxa-4(20),11(12)-dien-5alpha-yl acetat	0.00103033	0.00179075	0.092859	0.189564	2.1126	2.1126	H36 up vs H0	0.0338504	0.067505	2.72651	2.72651	H42 up vs H0	0.00665138	0.0110059	3.74582	3.74582	H57 up vs H0	8.95342e-05	0.000201233	7.27442	7.27442	H81 up vs H0	0.000327484	0.00401939	6.3726	6.3726	H312 up vs H0	5.77407	30.1178	27.1235	1
[FA (20:0)] 11Z-eicosenoic acid	310.287	3.58306	C20H38O2	Lipids: Fatty Acyls	Biosynthesis of unsaturated fatty acids	[FA (18:1)] 9Z-octadecenoic acid	0.000432607	0.000822311	0.195251	0.320008	1.94628	1.94628	H36 up vs H0	0.203964	0.295042	1.97734	1.97734	H42 up vs H0	0.00299776	0.00542901	5.54466	5.54466	H57 up vs H0	3.73824e-05	9.17931e-05	11.9927	11.9927	H81 up vs H0	0.256969	0.524582	1.8338	1.8338	H312 up vs H0	6.60445	47.032	37.0305	1
5-O-Methylembelin	308.199	3.58755	C18H28O4	0	0	5-O-Methylembelin	2.93972e-05	7.51262e-05	0.000225143	0.00170713	508.487	508.487	H36 up vs H0	0.000420168	0.00180072	467.03	467.03	H42 up vs H0	1.3335e-05	4.48838e-05	3426.46	3426.46	H57 up vs H0	7.63443e-06	2.3836e-05	3304.07	3304.07	H81 up vs H0	0.111526	0.298268	12.2515	12.2515	H312 up vs H0	9.53404	573.877	313	1
[FA (17:3)] 5,8,11-heptadecatriynoic acid	258.162	3.58906	C17H22O2	Lipids: Fatty Acyls	Fatty Acids and Conjugates	[FA (17:3)] 5,8,11-heptadecatriynoic ac	0.336031	0.358919	0.563842	0.681351	0.895968	-1.11611	H36 down vs H0	0.815678	0.860578	0.954836	-1.0473	H42 down vs H0	0.554285	0.593876	1.12477	1.12477	H57 up vs H0	0.299945	0.348421	1.21986	1.21986	H81 up vs H0	0.330329	0.615812	0.823089	-1.21494	H312 down vs H0	1.20152	1.20404	5.21088	1
Solavetivone	218.167	3.59084	C15H22O	0	sesquiterpenoid phytoalexins biosynthes	[FA (17:3)] 5,8,11-heptadecatriynoic ac	0.0499531	0.0619706	0.217399	0.352126	0.747724	-1.33739	H36 down vs H0	0.441468	0.535348	0.828813	-1.20654	H42 down vs H0	0.748362	0.776496	1.08099	1.08099	H57 up vs H0	0.153911	0.18763	1.40181	1.40181	H81 up vs H0	0.164176	0.38953	0.70902	-1.4104	H312 down vs H0	2.58748	3.88415	7.80589	1
Tremetone	202.099	3.59342	C13H14O2	0	0	[FA (17:3)] 5,8,11-heptadecatriynoic ac	0.218322	0.238358	0.340829	0.48489	0.811583	-1.23216	H36 down vs H0	0.564838	0.648483	0.877183	-1.14001	H42 down vs H0	0.873088	0.885927	1.03692	1.03692	H57 up vs H0	0.256147	0.302122	1.28379	1.28379	H81 up vs H0	0.289217	0.570171	0.784167	-1.27524	H312 down vs H0	1.51899	1.99575	6.8321	1
Nonadecanoicacid	298.287	3.59431	C19H38O2	Lipids: Fatty Acyls	Fatty Acids and Conjugates	[FA (18:1)] 9Z-octadecenoic acid	0.000115484	0.000245937	0.243181	0.379627	1.7404	1.7404	H36 up vs H0	0.250024	0.347117	1.76865	1.76865	H42 up vs H0	0.00144435	0.00284653	5.62283	5.62283	H57 up vs H0	1.31051e-05	3.7196e-05	12.0135	12.0135	H81 up vs H0	0.159405	0.385928	2.01788	2.01788	H312 up vs H0	7.97146	48.7118	31.776	1
[FA (20:4)] 5Z,8Z,11Z,14Z-eicosatetraenoic acid	304.24	3.60387	C20H32O2	Lipids: Fatty Acyls	Fatty Acids and Conjugates	[FA (18:1)] 9Z-octadecenoic acid	0.0390169	0.0488596	0.0791792	0.17073	2.16866	2.16866	H36 up vs H0	0.0524903	0.0989572	2.45757	2.45757	H42 up vs H0	0.0210662	0.0305371	2.9642	2.9642	H57 up vs H0	0.00167815	0.00280368	4.41335	4.41335	H81 up vs H0	0.0122707	0.0577366	3.29048	3.29048	H312 up vs H0	2.7703	14.1134	26.4916	1
Icosadienoic acid	308.272	3.60399	C20H36O2	Lipid Metabolism	Biosynthesis of unsaturated fatty acids	[FA (18:1)] 9Z-octadecenoic acid	0.00119083	0.00205934	0.0858461	0.181334	2.41749	2.41749	H36 up vs H0	0.0597305	0.110198	2.76373	2.76373	H42 up vs H0	0.00228829	0.00425586	5.73248	5.73248	H57 up vs H0	4.01599e-05	9.79163e-05	11.456	11.456	H81 up vs H0	0.0560162	0.179469	2.80912	2.80912	H312 up vs H0	5.64039	39.1272	36.0722	1
[FA methyl(18:0)] 11R,12S-methylene-octadecanoic acid	296.271	3.6045	C19H36O2	Lipids: Fatty Acyls	Fatty Acids and Conjugates	[FA (18:1)] 9Z-octadecenoic acid	0.00183214	0.00300995	0.352546	0.495303	1.69589	1.69589	H36 up vs H0	0.249919	0.347117	1.9855	1.9855	H42 up vs H0	0.00778583	0.0127003	5.36972	5.36972	H57 up vs H0	0.000175357	0.000364447	11.4804	11.4804	H81 up vs H0	0.294975	0.579866	1.86434	1.86434	H312 up vs H0	5.2504	46.3975	45.9521	1
[FA (18:1)] 9Z-octadecenoic acid	282.256	3.60568	C18H34O2	Lipids: Fatty Acyls	Fatty acid biosynthesis__Biosynthesis o	[FA (18:1)] 9Z-octadecenoic acid	0.00441838	0.00664201	0.407881	0.542269	1.59904	1.59904	H36 up vs H0	0.52823	0.612229	1.45147	1.45147	H42 up vs H0	0.0322838	0.0450308	3.73714	3.73714	H57 up vs H0	0.000466205	0.000888623	9.32362	9.32362	H81 up vs H0	0.464887	0.757221	1.54079	1.54079	H312 up vs H0	4.48798	39.6598	45.9518	1
16-hydroxypalmitate	272.235	3.62421	C16H32O3	0	cutin biosynthesis	[FA (18:1)] 9Z-octadecenoic acid	0.043863	0.0547296	0.223205	0.357335	1.81119	1.81119	H36 up vs H0	0.310863	0.409343	1.67172	1.67172	H42 up vs H0	0.0333871	0.0462593	3.05534	3.05534	H57 up vs H0	0.00270111	0.00432428	4.84639	4.84639	H81 up vs H0	0.305946	0.594143	1.6807	1.6807	H312 up vs H0	2.68344	17.2568	33.4405	1
Linoleate	280.24	3.62933	C18H32O2	Lipids: Fatty Acyls	Linoleic acid metabolism__Biosynthesis	[FA (18:1)] 9Z-octadecenoic acid	0.00512469	0.00757181	0.241081	0.378059	1.94021	1.94021	H36 up vs H0	0.25571	0.353588	1.95548	1.95548	H42 up vs H0	0.018803	0.0276044	4.24621	4.24621	H57 up vs H0	0.00026712	0.000531161	10.2581	10.2581	H81 up vs H0	0.216538	0.465005	2.07687	2.07687	H312 up vs H0	4.36383	37.8041	45.0479	1
[FA (17:0)] heptadecanoic acid	270.256	3.63833	C17H34O2	Lipids: Fatty Acyls	Fatty Acids and Conjugates	[FA (18:1)] 9Z-octadecenoic acid	0.00101101	0.00176162	0.10064	0.199545	2.45508	2.45508	H36 up vs H0	0.120266	0.198203	2.42366	2.42366	H42 up vs H0	0.00152054	0.00295542	7.04642	7.04642	H57 up vs H0	6.21153e-05	0.000144308	12.3715	12.3715	H81 up vs H0	0.126455	0.325575	2.38718	2.38718	H312 up vs H0	5.79164	45.7632	41.0883	1
Triphenyl phosphate	326.071	3.64215	C18H15O4P	0	0	[FA (17:3)] 5,8,11-heptadecatriynoic ac	0.936728	0.938087	0.286583	0.423431	0.811432	-1.23239	H36 down vs H0	0.703454	0.773987	0.925699	-1.08026	H42 down vs H0	0.613317	0.651446	0.902483	-1.10805	H57 down vs H0	0.541458	0.593026	0.887953	-1.12619	H81 down vs H0	0.587629	0.853084	0.895704	-1.11644	H312 down vs H0	0.24859	0.260249	5.44387	1
[FA methoxy,trihydrox] 1-methoxy-9S,11R,15S-trihydroxy-5Z,13E-prostadiene	354.277	3.65056	C21H38O4	Lipids: Fatty Acyls	Eicosanoids	[FA methyl(4:2/18:2)] methyl 9-butylper	0.0194715	0.0262922	0.258883	0.395198	0.475366	-2.10364	H36 down vs H0	0.652647	0.723997	0.736089	-1.35853	H42 down vs H0	0.0283562	0.0401762	0.209665	-4.76951	H57 down vs H0	0.0312232	0.0421604	0.23055	-4.33746	H81 down vs H0	0.383168	0.671585	1.81654	1.81654	H312 up vs H0	3.29584	38.8282	61.2611	1
[FA methyl(4:2/18:2)] methyl 9-butylperoxy-10,12-octadecadienoate	382.308	3.65068	C23H42O4	Lipids: Fatty Acyls	Fatty Acids and Conjugates	[FA methyl(4:2/18:2)] methyl 9-butylper	0.000161478	0.000330622	0.0399313	0.0987549	0.457529	-2.18566	H36 down vs H0	0.202302	0.293253	0.61023	-1.63873	H42 down vs H0	0.0158234	0.0236836	0.377262	-2.65068	H57 down vs H0	0.0003761	0.000731012	0.228502	-4.37633	H81 down vs H0	0.183466	0.419177	1.67533	1.67533	H312 up vs H0	7.61198	28.2369	19.2896	1
[FA (11:2)] 4,10-undecadiynal	162.104	3.65394	C11H14O	Lipids: Fatty Acyls	Fatty aldehydes	[FA (17:3)] 5,8,11-heptadecatriynoic ac	0.106603	0.123004	0.144041	0.257483	1.22327	1.22327	H36 up vs H0	0.326041	0.427696	0.869463	-1.15014	H42 down vs H0	0.531527	0.573949	1.09266	1.09266	H57 up vs H0	0.251458	0.2971	1.16991	1.16991	H81 up vs H0	0.549049	0.821787	0.918665	-1.08854	H312 down vs H0	2.03605	1.03435	2.64169	1
[ST (4:0)] 5beta-Cholestane-3alpha,7alpha,12alpha,26-tetrol	436.355	3.65459	C27H48O4	Lipids: Sterol lipids	Bile acid biosynthesis	[FA methyl(4:2/18:2)] methyl 9-butylper	0.0581501	0.0708897	0.106181	0.207549	0.14468	-6.9118	H36 down vs H0	0.264833	0.364013	0.252871	-3.95459	H42 down vs H0	0.0663431	0.0880322	0.0990399	-10.0969	H57 down vs H0	0.0141808	0.0201748	0.0479821	-20.8411	H81 down vs H0	0.843506	0.99689	1.27195	1.27195	H312 up vs H0	2.47594	93.7564	196.909	1
MG(0:0/22:2(13Z,16Z)/0:0)	410.339	3.65682	C25H46O4	Lipids: Glycerolipids	Monoradylglycerols	[FA methyl(4:2/18:2)] methyl 9-butylper	0.0287692	0.0374542	0.220784	0.355108	0.439153	-2.27711	H36 down vs H0	0.449703	0.540407	0.591087	-1.6918	H42 down vs H0	0.0200102	0.0291288	0.183068	-5.46246	H57 down vs H0	0.0422331	0.0557187	0.24629	-4.06026	H81 down vs H0	0.488928	0.775144	1.61755	1.61755	H312 up vs H0	2.99848	36.6133	63.4953	1
[FA methoxy,hydroxy(18:2)] 8-methoxy-13-hydroxy-9,11-octadecadienoic acid	326.246	3.6619	C19H34O4	Lipids: Fatty Acyls	Fatty Acids and Conjugates	[FA methyl(4:2/18:2)] methyl 9-butylper	0.00293148	0.00456596	0.0904566	0.186314	0.191223	-5.22949	H36 down vs H0	0.845591	0.884027	0.824241	-1.21324	H42 down vs H0	0.246601	0.289379	0.311982	-3.20531	H57 down vs H0	0.00140128	0.00238148	0.0346142	-28.8899	H81 down vs H0	0.499553	0.786967	1.95991	1.95991	H312 up vs H0	4.83776	121.54	130.641	1
(9Z)-Hexadecenoic acid	254.225	3.67206	C16H30O2	Lipid Metabolism	Fatty acid biosynthesis	[FA (18:1)] 9Z-octadecenoic acid	0.0032809	0.00506447	0.331765	0.476913	1.78431	1.78431	H36 up vs H0	0.407579	0.505809	1.67322	1.67322	H42 up vs H0	0.0164474	0.0245548	4.7985	4.7985	H57 up vs H0	0.000234735	0.000477779	12.1322	12.1322	H81 up vs H0	0.103707	0.28854	2.80426	2.80426	H312 up vs H0	4.74082	46.1198	50.5868	1
[FA (20:0)] eicosanoic acid	312.303	3.67264	C20H40O2	Lipids: Fatty Acyls	Fatty Acids and Conjugates	[FA (20:0)] eicosanoic acid	1.53302e-07	1.05778e-06	0.123279	0.229898	1.72049	1.72049	H36 up vs H0	0.802295	0.849054	0.913931	-1.09417	H42 down vs H0	0.000115874	0.000288639	5.01374	5.01374	H57 up vs H0	1.74589e-07	1.21601e-06	11.034	11.034	H81 up vs H0	0.376314	0.667497	1.37749	1.37749	H312 up vs H0	17.2742	56.8943	17.1267	1
omega-Cyclohexylundecanoic acid	268.24	3.67329	C17H32O2	Lipids: Fatty Acyls	Fatty Acids and Conjugates	[FA (18:1)] 9Z-octadecenoic acid	0.00312232	0.00484136	0.345944	0.489142	1.7876	1.7876	H36 up vs H0	0.400798	0.502819	1.71581	1.71581	H42 up vs H0	0.0151184	0.0228765	5.17701	5.17701	H57 up vs H0	0.000255364	0.0005126	12.9403	12.9403	H81 up vs H0	0.214076	0.463048	2.23661	2.23661	H312 up vs H0	4.78338	49.7146	54.0446	1
3-Hexenal	98.0732	3.67683	C6H10O	Lipids: Fatty Acyls	alpha-Linolenic acid metabolism	[FA methyl(4:2/18:2)] methyl 9-butylper	0.000196072	0.000395584	0.0781662	0.170141	0.6937	-1.44155	H36 down vs H0	0.105736	0.178381	0.705316	-1.4178	H42 down vs H0	0.0666089	0.0881549	0.67111	-1.49007	H57 down vs H0	0.000769619	0.00139747	0.467909	-2.13717	H81 down vs H0	0.0875697	0.249682	1.44743	1.44743	H312 up vs H0	7.4078	8.36285	5.87041	1
[PR] (-)-Limonene	136.125	3.68829	C10H16	Lipids: Prenols	Monoterpenoid biosynthesis__Limonene an	Styrene	0.0421954	0.0527443	0.983007	1	1.00385	1.00385	H36 up vs H0	0.725354	0.786989	0.93588	-1.06851	H42 down vs H0	0.608816	0.648277	0.907861	-1.10149	H57 down vs H0	0.0457953	0.0598461	0.687443	-1.45467	H81 down vs H0	0.162788	0.38953	1.30741	1.30741	H312 up vs H0	2.71215	2.45693	4.71067	1
[FA oxo(19:0)] 10-oxo-nonadecanoic acid	312.267	3.69054	C19H36O3	Lipids: Fatty Acyls	Fatty Acids and Conjugates	[FA (18:1)] 9Z-octadecenoic acid	0.536125	0.550486	0.309213	0.447289	0.37775	-2.64725	H36 down vs H0	0.737889	0.794296	0.717762	-1.39322	H42 down vs H0	0.868934	0.883011	1.17749	1.17749	H57 up vs H0	0.40495	0.459564	2.21366	2.21366	H81 up vs H0	0.884024	1	0.865524	-1.15537	H312 down vs H0	0.836133	20.9087	130.033	1
[FA dimethyl(13:0)] 2,5-dimethyl-2E-tridecenoic acid	240.209	3.6907	C15H28O2	Lipids: Fatty Acyls	Fatty Acids and Conjugates	[FA (18:1)] 9Z-octadecenoic acid	0.00042027	0.000801068	0.139138	0.252572	2.22593	2.22593	H36 up vs H0	0.269245	0.367152	1.85589	1.85589	H42 up vs H0	0.00276976	0.0050293	6.11436	6.11436	H57 up vs H0	2.49071e-05	6.41264e-05	14.6107	14.6107	H81 up vs H0	0.0382168	0.131033	3.30692	3.30692	H312 up vs H0	6.63302	51.7778	40.5915	1
Daphnoline	290.128	3.69123	C35H36N2O6	0	0	Daphnoline	0.347594	0.370696	0.482807	0.603622	0.295019	-3.38961	H36 down vs H0	0.422236	0.516426	0.232188	-4.30686	H42 down vs H0	0.421746	0.466353	0.231825	-4.3136	H57 down vs H0	0.050348	0.0651784	0.0296454	-33.7321	H81 down vs H0	0.984382	1	1.03603	1.03603	H312 up vs H0	1.17608	98.1202	433.834	1
Tetradecanoic acid	228.209	3.69689	C14H28O2	Lipid Metabolism	Fatty acid biosynthesis	Hexadecanoic acid	0.0188987	0.0255689	0.155066	0.271563	1.58473	1.58473	H36 up vs H0	0.616209	0.697023	1.18127	1.18127	H42 up vs H0	0.0733392	0.0962054	1.84561	1.84561	H57 up vs H0	0.00122337	0.00211031	3.12887	3.12887	H81 up vs H0	0.333936	0.619398	1.38167	1.38167	H312 up vs H0	3.31883	9.31103	14.5887	1
1,6-Dimethylnaphthalene	156.094	3.70294	C12H12	0	0	Styrene	0.147762	0.166594	0.0123907	0.0393459	2.09279	2.09279	H36 up vs H0	0.129012	0.207242	1.56832	1.56832	H42 up vs H0	0.0785823	0.102113	1.69138	1.69138	H57 up vs H0	0.275522	0.323868	1.35812	1.35812	H81 up vs H0	0.534519	0.810589	1.19803	1.19803	H312 up vs H0	1.80094	3.86004	11.1454	1
[FA hydroxy(18:0)] 2S-hydroxy-octadecanoic acid	300.266	3.70307	C18H36O3	Lipids: Fatty Acyls	Fatty Acids and Conjugates	Hexadecanoic acid	0.0107749	0.0152663	0.454016	0.577991	1.35397	1.35397	H36 up vs H0	0.751508	0.805187	1.14254	1.14254	H42 up vs H0	0.0997745	0.125628	2.03545	2.03545	H57 up vs H0	0.0020993	0.00344885	3.90319	3.90319	H81 up vs H0	0.93247	1	0.964999	-1.03627	H312 down vs H0	3.75881	16.9563	23.4576	1
[FA methyl(14:0)] 12-methyl-tetradecanoic acid	242.225	3.70421	C15H30O2	Lipids: Fatty Acyls	Fatty Acids and Conjugates	Hexadecanoic acid	0.0035473	0.0054392	0.242315	0.379133	1.97854	1.97854	H36 up vs H0	0.457476	0.546122	1.5672	1.5672	H42 up vs H0	0.00917075	0.0147159	5.34948	5.34948	H57 up vs H0	0.000298515	0.0005885	10.7952	10.7952	H81 up vs H0	0.11891	0.31316	2.6132	2.6132	H312 up vs H0	4.67402	43.1492	48.0049	1
[FA hydroxy(18:2)] 9S-hydroxy-10E,12Z-octadecadienoic acid	296.235	3.70446	C18H32O3	Lipids: Fatty Acyls	Linoleic acid metabolism	Hexadecanoic acid	0.599287	0.612605	0.357419	0.49747	1.99353	1.99353	H36 up vs H0	0.839365	0.878849	0.854303	-1.17054	H42 down vs H0	0.732107	0.760774	1.3049	1.3049	H57 up vs H0	0.20202	0.242424	2.62167	2.62167	H81 up vs H0	0.999756	1	1.00024	1.00024	H312 up vs H0	0.741696	11.4142	80.0243	1
Botrydial	310.178	3.72509	C17H26O5	Lipids: Prenols	Isoprenoids		0.501839	0.51887	0.261146	0.39578	0.832173	-1.20167	H36 down vs H0	0.133894	0.211897	0.772239	-1.29494	H42 down vs H0	0.0870063	0.112004	0.742965	-1.34596	H57 down vs H0	0.231236	0.275567	0.821963	-1.2166	H81 down vs H0	0.638117	0.887703	0.923579	-1.08274	H312 down vs H0	0.890331	0.646385	3.77522	1
[FA oxo(16:0)] 3-oxo-hexadecanoic acid	270.22	3.73134	C16H30O3	Lipids: Fatty Acyls	Fatty Acids and Conjugates	Hexadecanoic acid	0.0956729	0.111135	0.437007	0.568933	1.39134	1.39134	H36 up vs H0	0.98789	0.999478	0.993326	-1.00672	H42 down vs H0	0.428595	0.472413	1.42105	1.42105	H57 up vs H0	0.0153009	0.0216345	2.96296	2.96296	H81 up vs H0	0.977286	1	1.01264	1.01264	H312 up vs H0	2.11412	10.5026	25.8328	1
1,2,4-Trimethylbenzene	120.094	3.73195	C9H12	0	0	Styrene	0.718727	0.727121	0.178231	0.299949	1.33211	1.33211	H36 up vs H0	0.477665	0.56148	1.16878	1.16878	H42 up vs H0	0.484652	0.527091	1.16587	1.16587	H57 up vs H0	0.991719	0.996049	1.00217	1.00217	H81 up vs H0	0.506489	0.794267	1.15699	1.15699	H312 up vs H0	0.574773	0.700699	6.33926	1
(9Z)-Tetradecenoic acid	226.193	3.737	C14H26O2	Lipids: Fatty Acyls	Fatty Acids and Conjugates	(9Z)-Tetradecenoic acid	0.00390352	0.00593266	0.342926	0.485871	1.90816	1.90816	H36 up vs H0	0.501715	0.585759	1.60953	1.60953	H42 up vs H0	0.0125873	0.0193868	6.50557	6.50557	H57 up vs H0	0.000385481	0.000745048	15.2539	15.2539	H81 up vs H0	0.0603221	0.188336	3.94302	3.94302	H312 up vs H0	4.59263	58.3138	66.0258	1
[6]-Gingerol	294.183	3.74765	C17H26O4	0	0		0.94611	0.94611	0.661278	0.779969	0.920907	-1.08589	H36 down vs H0	0.826587	0.869428	0.957939	-1.04391	H42 down vs H0	0.659294	0.691357	1.09046	1.09046	H57 up vs H0	0.787862	0.819947	1.05184	1.05184	H81 up vs H0	0.85807	1	0.965537	-1.03569	H312 down vs H0	0.229701	0.225322	5.10089	1
CAI-1	214.193	3.75603	C13H26O2	0	0	Dodecanoic acid	0.0016112	0.00269837	0.182217	0.305169	1.91412	1.91412	H36 up vs H0	0.388786	0.49313	1.54289	1.54289	H42 up vs H0	0.00753087	0.0123428	4.19442	4.19442	H57 up vs H0	0.000107674	0.000236609	8.6676	8.6676	H81 up vs H0	0.108451	0.292309	2.27614	2.27614	H312 up vs H0	5.36552	34.1719	33.1178	1
[FA trihydroxy(2:0)] 9S,11R,15S-trihydroxy-2,3-dinor-5Z,13E-prostadienoic acid-cyclo[8S,12R]	326.209	3.75788	C18H30O5	Lipids: Fatty Acyls	Eicosanoids	[FA trihydroxy(2:0)] 9S,11R,15S-trihydr	6.82756e-05	0.000153955	0.141251	0.253347	1.46413	1.46413	H36 up vs H0	0.775343	0.829437	1.07862	1.07862	H42 up vs H0	0.000497373	0.00106407	2.83925	2.83925	H57 up vs H0	2.39137e-05	6.20317e-05	3.62836	3.62836	H81 up vs H0	0.108161	0.292309	1.54752	1.54752	H312 up vs H0	8.55312	15.327	9.3183	1
2-Oxooctadecanoic acid	298.251	3.75955	C18H34O3	Lipids: Fatty Acyls	Fatty Acids and Conjugates	Hexadecanoic acid	0.0671224	0.0800975	0.673373	0.787344	1.22828	1.22828	H36 up vs H0	0.622167	0.702611	0.77785	-1.2856	H42 down vs H0	0.351036	0.392569	1.61343	1.61343	H57 up vs H0	0.0231658	0.0318414	3.20205	3.20205	H81 up vs H0	0.812547	0.978493	0.886321	-1.12826	H312 down vs H0	2.37114	15.6535	34.3287	1
[SP (16:0)] N-(hexadecanoyl)-sphinganine	539.529	3.76348	C34H69NO3	Lipids: Sphingolipids	Ceramides	[PE (18:1/18:1)] 1-(1Z-octadecenyl)-2-(	4.29082e-05	0.000103883	0.183549	0.305915	6.35665	6.35665	H36 up vs H0	0.114747	0.191246	10.0475	10.0475	H42 up vs H0	0.0844199	0.108878	12.6384	12.6384	H57 up vs H0	5.5842e-06	1.85626e-05	2195.62	2195.62	H81 up vs H0	1	1	1	1	No change between H312 and H0	9.08625	472.558	270.442	1
2S-Hydroxytetradecanoic acid	244.204	3.76956	C14H28O3	Lipids: Fatty Acyls	Fatty Acids and Conjugates	Hexadecanoic acid	0.00364139	0.00555876	0.116699	0.221215	1.83872	1.83872	H36 up vs H0	0.117803	0.195866	1.88541	1.88541	H42 up vs H0	0.0141082	0.0214893	2.80542	2.80542	H57 up vs H0	0.000126781	0.000271673	5.40779	5.40779	H81 up vs H0	0.200929	0.438755	1.67261	1.67261	H312 up vs H0	4.6517	18.598	20.7901	1
Dodecanoic acid	200.178	3.77576	C12H24O2	Lipid Metabolism	Fatty acid biosynthesis	Dodecanoic acid	0.00640084	0.00935716	0.262132	0.39578	1.9974	1.9974	H36 up vs H0	0.50139	0.585759	1.53698	1.53698	H42 up vs H0	0.0143392	0.0217931	5.23029	5.23029	H57 up vs H0	0.000540405	0.00102439	10.8127	10.8127	H81 up vs H0	0.16428	0.38953	2.46516	2.46516	H312 up vs H0	4.17986	43.2187	53.7667	1
[SP (16:0)] N-(hexadecanoyl)-sphing-4-enine	537.512	3.78515	C34H67NO3	Lipids: Sphingolipids	Ceramides	[PE (18:1/18:1)] 1-(1Z-octadecenyl)-2-(	0.0014071	0.00239138	0.456255	0.579771	0.558279	-1.79122	H36 down vs H0	0.301295	0.400566	2.33718	2.33718	H42 up vs H0	0.06725	0.0887237	4.65215	4.65215	H57 up vs H0	0.000744476	0.00135896	19.0067	19.0067	H81 up vs H0	0.359326	0.654182	2.11946	2.11946	H312 up vs H0	5.48796	92.5183	87.6638	1
Cinnamyl alcohol	134.073	3.78678	C9H10O	0	0	Tiglic acid	0.202418	0.222757	0.17582	0.296729	0.855066	-1.1695	H36 down vs H0	0.0504038	0.0959783	0.785766	-1.27264	H42 down vs H0	0.237794	0.280475	0.867624	-1.15257	H57 down vs H0	0.0175595	0.0246762	0.751762	-1.33021	H81 down vs H0	0.377675	0.668194	0.8999	-1.11123	H312 down vs H0	1.57383	0.565455	1.86828	1
3-Isopropylcatechol	152.084	3.78693	C9H12O2	0	0	3-Isopropylcatechol	0.29943	0.321317	0.0798048	0.171543	0.0339186	-29.4823	H36 down vs H0	0.0542522	0.102	0.0200804	-49.7997	H42 down vs H0	0.06604	0.0877989	0.0242362	-41.2606	H57 down vs H0	0.0390097	0.0519628	0.0176901	-56.5288	H81 down vs H0	0.217002	0.465005	0.0860526	-11.6208	H312 down vs H0	1.28751	125.886	508.429	1
[FA (7:1)] 2-heptenal	112.089	3.79275	C7H12O	Lipids: Fatty Acyls	Fatty aldehydes	Alizarin	0.000332075	0.000645441	0.0126021	0.0393459	0.657253	-1.52149	H36 down vs H0	0.000212966	0.00109475	0.494941	-2.02044	H42 down vs H0	0.000139876	0.00034104	0.482185	-2.07389	H57 down vs H0	0.000378045	0.000732728	0.527761	-1.8948	H81 down vs H0	0.269857	0.54378	0.831604	-1.2025	H312 down vs H0	6.86786	4.77988	3.61909	1
Hexadecanoic acid	256.24	3.79597	C16H32O2	Lipid Metabolism	Fatty acid biosynthesis__Fatty acid elo	Hexadecanoic acid	0.139589	0.157664	0.26146	0.39578	1.38543	1.38543	H36 up vs H0	0.937621	0.95704	1.02372	1.02372	H42 up vs H0	0.30907	0.351331	1.36036	1.36036	H57 up vs H0	0.0414487	0.0547885	1.83905	1.83905	H81 up vs H0	0.687628	0.931386	0.886378	-1.12819	H312 down vs H0	1.8419	4.2166	11.9042	1
alpha-Methylstyrene	118.078	3.80105	C9H10	0	0	Styrene	0.0541698	0.0665074	0.320703	0.46294	1.34003	1.34003	H36 up vs H0	0.0374196	0.0731432	0.515635	-1.93936	H42 down vs H0	0.647838	0.682455	1.14976	1.14976	H57 up vs H0	0.586545	0.634351	0.85281	-1.17259	H81 down vs H0	0.574127	0.846469	0.842082	-1.18753	H312 down vs H0	2.52791	5.99761	12.3373	1
Octadecanoic acid	284.271	3.80444	C18H36O2	Lipid Metabolism	Fatty acid biosynthesis__Biosynthesis o	Hexadecanoic acid	0.695759	0.704954	0.752541	0.856127	1.08052	1.08052	H36 up vs H0	0.36125	0.465042	0.78985	-1.26606	H42 down vs H0	0.347449	0.389188	0.784355	-1.27493	H57 down vs H0	0.92256	0.936127	0.976426	-1.02414	H81 down vs H0	0.515244	0.797127	0.845809	-1.1823	H312 down vs H0	0.606218	1.01629	8.71754	1
[PR] Citronellyl acetate	198.162	3.82234	C12H22O2	Lipids: Prenols	Isoprenoids	Dodecanoic acid	0.0203066	0.0272069	0.244832	0.380481	2.22121	2.22121	H36 up vs H0	0.392209	0.496558	1.83952	1.83952	H42 up vs H0	0.0275644	0.0392153	5.13116	5.13116	H57 up vs H0	0.00123146	0.00211889	11.3766	11.3766	H81 up vs H0	0.0671778	0.2051	3.81217	3.81217	H312 up vs H0	3.26356	41.6648	66.3868	1
[PE (18:0/18:2)] 1-octadecanoyl-2-(9Z,12Z-octadecadienoyl)-sn-glycero-3-phosphoethanolamine	743.547	3.8264	C41H78NO8P	Lipids: Glycerophospholipids	Glycerophosphoethanolamines	[PE (18:0/18:2)] 1-octadecanoyl-2-(9Z,1	0.00164331	0.00272567	0.355517	0.496572	0.86528	-1.1557	H36 down vs H0	0.258914	0.357301	0.830739	-1.20375	H42 down vs H0	0.998502	0.998502	0.999695	-1.0003	H57 down vs H0	0.0104372	0.0152578	1.52904	1.52904	H81 up vs H0	0.0550642	0.177543	1.38088	1.38088	H312 up vs H0	5.34778	3.59145	3.4922	1
[PC (15:0/18:1)] 1-pentadecanoyl-2-(11Z-octadecenoyl)-sn-glycero-3-phosphocholine	745.562	3.82768	C41H80NO8P	Lipids: Glycerophospholipids	Glycerophosphocholines	[PE (18:0/18:2)] 1-octadecanoyl-2-(9Z,1	8.50268e-05	0.000186249	0.336158	0.481223	0.858085	-1.16539	H36 down vs H0	0.19386	0.284745	0.804466	-1.24306	H42 down vs H0	0.705271	0.736213	0.939523	-1.06437	H57 down vs H0	0.00238716	0.00387562	1.69139	1.69139	H81 up vs H0	0.0107222	0.0527498	1.56593	1.56593	H312 up vs H0	8.30756	5.75209	3.60044	1
[PE (18:1/18:2)] 1-(9Z-octadecenoyl)-2-(9Z,12Z-octadecadienoyl)-sn-glycero-3-phosphoethanolamine	741.531	3.82962	C41H76NO8P	Lipids: Glycerophospholipids	Glycerophosphoethanolamines	[PE (18:0/18:2)] 1-octadecanoyl-2-(9Z,1	0.00429374	0.00646873	0.560572	0.680559	0.919581	-1.08745	H36 down vs H0	0.501472	0.585759	0.903711	-1.10655	H42 down vs H0	0.810246	0.82948	1.03668	1.03668	H57 up vs H0	0.0268824	0.0365134	1.39597	1.39597	H81 up vs H0	0.012809	0.0597179	1.48739	1.48739	H312 up vs H0	4.51208	2.5896	2.98442	1
PE(18:1(11Z)/P-18:1(11Z))	727.552	3.84997	C41H78NO7P	Lipids: Glycerophospholipids	Glycerophosphoethanolamines	[PE (18:1/18:1)] 1-(1Z-octadecenyl)-2-(	0.00511766	0.00757181	0.690283	0.797026	0.635789	-1.57285	H36 down vs H0	0.136703	0.214863	6.06629	6.06629	H42 up vs H0	0.0344755	0.0475761	13.7322	13.7322	H57 up vs H0	0.00316495	0.00502026	38.6765	38.6765	H81 up vs H0	0.0260512	0.101484	15.9689	15.9689	H312 up vs H0	4.36498	156.502	186.441	1
[PE (18:1/18:1)] 1-(1Z-octadecenyl)-2-(9Z-octadecenoyl)-sn-glycero-3-phosphoethanolamine	729.567	3.85028	C41H80NO7P	Lipids: Glycerophospholipids	Glycerophosphoethanolamines	[PE (18:1/18:1)] 1-(1Z-octadecenyl)-2-(	5.44794e-09	7.83141e-08	0.000103507	0.00108825	71.627	71.627	H36 up vs H0	2.41485e-07	8.14961e-06	851.397	851.397	H42 up vs H0	1.10726e-08	3.05604e-07	2978.79	2978.79	H57 up vs H0	2.70209e-10	9.3222e-09	10202	10202	H81 up vs H0	2.14811e-07	2.11742e-05	891.536	891.536	H312 up vs H0	24.0585	595.515	128.715	1
[FA (11:0)] undecanoic acid	186.162	3.85576	C11H22O2	Lipids: Fatty Acyls	Fatty Acids and Conjugates	Hexadecanoic acid	0.00596893	0.00878159	0.0846	0.179612	2.14208	2.14208	H36 up vs H0	0.266377	0.365408	1.65535	1.65535	H42 up vs H0	0.0164766	0.0245548	3.11959	3.11959	H57 up vs H0	0.00021783	0.000445588	6.19174	6.19174	H81 up vs H0	0.11325	0.300549	2.06947	2.06947	H312 up vs H0	4.23738	21.7066	26.6378	1
[PE (16:0/18:2)] 1-hexadecanoyl-2-(9Z,12Z-octadecadienoyl)-sn-glycero-3-phosphoethanolamine	715.515	3.85931	C39H74NO8P	Lipids: Glycerophospholipids	Glycerophosphoethanolamines	[PE (18:0/18:2)] 1-octadecanoyl-2-(9Z,1	0.0171928	0.0234447	0.653305	0.771885	1.09759	1.09759	H36 up vs H0	0.820807	0.864667	1.05019	1.05019	H42 up vs H0	0.76442	0.788416	1.06696	1.06696	H57 up vs H0	0.132632	0.163714	1.37457	1.37457	H81 up vs H0	0.00221186	0.0158977	2.06817	2.06817	H312 up vs H0	3.39194	4.04264	6.19755	1
12-Hydroxydodecanoic acid	216.172	3.8671	C12H24O3	Lipids: Fatty Acyls	Fatty Acids and Conjugates	Hexadecanoic acid	0.0870156	0.10142	0.233398	0.370218	1.65692	1.65692	H36 up vs H0	0.218037	0.311482	1.72579	1.72579	H42 up vs H0	0.0965946	0.12207	2.10693	2.10693	H57 up vs H0	0.00453075	0.00696262	3.61823	3.61823	H81 up vs H0	0.420156	0.715821	1.4249	1.4249	H312 up vs H0	2.18269	10.612	25.2818	1
[PE (16:0/18:1)] 1-Hexadecanoyl-2-(9Z-octadecenoyl)-sn-glycero-3-phosphoethanolamine	717.531	3.86759	C39H76NO8P	Lipids: Glycerophospholipids	Glycerophosphoethanolamines	[PE (18:0/18:2)] 1-octadecanoyl-2-(9Z,1	0.0520728	0.0641611	0.839917	0.916998	0.962496	-1.03897	H36 down vs H0	0.990623	1	1.00232	1.00232	H42 up vs H0	0.486174	0.527453	0.870887	-1.14826	H57 down vs H0	0.534761	0.586621	0.888816	-1.12509	H81 down vs H0	0.0270968	0.103871	1.58145	1.58145	H312 up vs H0	2.55691	2.54722	5.18029	1
[FA hydroxy(18:0)] 9,10-dihydroxy-octadecanoic acid	316.261	3.872	C18H36O4	Lipids: Fatty Acyls	Fatty Acids and Conjugates	Hexadecanoic acid	0.494413	0.513	0.101735	0.200705	0.253243	-3.94877	H36 down vs H0	0.468627	0.554088	0.536927	-1.86245	H42 down vs H0	0.791864	0.811866	0.798163	-1.25288	H57 down vs H0	0.945591	0.953886	1.05737	1.05737	H81 up vs H0	0.584604	0.853084	0.626209	-1.59691	H312 down vs H0	0.902402	16.7857	96.7261	1
Alizarin	120.021	3.88088	C14H8O4	Biosynthesis of Secondary Metabolites	alizarin biosynthesis	Alizarin	0.00785966	0.0112748	0.0124594	0.0393459	0.594507	-1.68207	H36 down vs H0	0.00561921	0.0152648	0.542959	-1.84176	H42 down vs H0	0.00305044	0.00550996	0.516404	-1.93647	H57 down vs H0	0.00711048	0.0106657	0.56786	-1.761	H81 down vs H0	0.623916	0.873098	0.904495	-1.10559	H312 down vs H0	4.01226	4.27166	5.53618	1
Leu-Leu-Phe	391.247	3.88686	C21H33N3O4	Peptide(tri-)	Hydrophobic peptide	Leu-Leu-Phe	0.0012941	0.00221571	0.806458	0.89504	1.54435	1.54435	H36 up vs H0	0.467344	0.554068	3.86827	3.86827	H42 up vs H0	0.28204	0.324887	7.49849	7.49849	H57 up vs H0	0.00723513	0.0108157	0.00599004	-166.944	H81 down vs H0	0.0435574	0.145191	0.0204227	-48.9651	H312 down vs H0	5.56421	486.917	455.046	1
[FA hydroxy(18:1)] 9,10-dihydroxy-12Z-octadecenoic acid	314.246	3.89711	C18H34O4	Lipids: Fatty Acyls	Fatty Acids and Conjugates	Decanoic acid	0.0714371	0.0845482	0.359593	0.497982	0.709299	-1.40984	H36 down vs H0	0.352755	0.454955	0.694909	-1.43904	H42 down vs H0	0.961022	0.965218	1.01916	1.01916	H57 up vs H0	0.108916	0.136108	1.84299	1.84299	H81 up vs H0	0.298556	0.584858	0.664954	-1.50386	H312 down vs H0	2.32579	8.95361	20.0185	1
[GL (18:0)] 1-octadecanoyl-rac-glycerol	358.308	3.9008	C21H42O4	Lipids: Glycerolipids	Monoradylglycerols	[GL (16:0)] 1-hexadecanoyl-rac-glycerol	0.0617385	0.0746051	0.211844	0.343935	0.781974	-1.27882	H36 down vs H0	0.10048	0.171612	0.710512	-1.40744	H42 down vs H0	0.0100959	0.0159775	0.573032	-1.7451	H57 down vs H0	0.0107046	0.0156155	0.589585	-1.69611	H81 down vs H0	0.453247	0.750247	0.858298	-1.1651	H312 down vs H0	2.43214	2.54827	5.44829	1
MG(0:0/14:0/0:0)	302.245	3.90708	C17H34O4	Lipids: Glycerolipids	Monoradylglycerols	Decanoic acid	0.502905	0.51887	0.675394	0.787344	0.916043	-1.09165	H36 down vs H0	0.102407	0.173912	0.693417	-1.44213	H42 down vs H0	0.300853	0.343689	0.795896	-1.25645	H57 down vs H0	0.666926	0.713456	0.91381	-1.09432	H81 down vs H0	0.174381	0.406495	0.739339	-1.35256	H312 down vs H0	0.888609	1.08122	6.32715	1
[FA oxo,hydroxy(18:3)] 12-oxo-14,18-dihydroxy-9Z,13E,15Z-octadecatrienoic acid	324.194	3.90925	C18H28O5	Lipids: Fatty Acyls	Fatty Acids and Conjugates	[FA oxo,hydroxy(18:3)] 12-oxo-14,18-dih	3.85662e-05	9.53788e-05	0.149974	0.266706	1.41464	1.41464	H36 up vs H0	0.740806	0.794985	1.08508	1.08508	H42 up vs H0	0.000659895	0.00139244	2.57163	2.57163	H57 up vs H0	1.26666e-05	3.62652e-05	3.51073	3.51073	H81 up vs H0	0.221743	0.473692	1.35765	1.35765	H312 up vs H0	9.21131	14.2943	8.06946	1
Decanoic acid	172.146	3.92095	C10H20O2	Lipid Metabolism	Fatty acid biosynthesis	Decanoic acid	0.0148172	0.0204477	0.292052	0.426941	1.85923	1.85923	H36 up vs H0	0.452954	0.542601	1.58235	1.58235	H42 up vs H0	0.0271836	0.0387535	4.09548	4.09548	H57 up vs H0	0.00123448	0.00211889	8.08591	8.08591	H81 up vs H0	0.37164	0.660906	1.72903	1.72903	H312 up vs H0	3.50763	33.1051	49.0777	1
[GL (16:0)] 1-hexadecanoyl-rac-glycerol	330.277	3.94874	C19H38O4	Lipids: Glycerolipids	Monoradylglycerols	[GL (16:0)] 1-hexadecanoyl-rac-glycerol	0.0236842	0.0313668	0.403282	0.541371	0.876294	-1.14117	H36 down vs H0	0.158933	0.241113	0.790228	-1.26546	H42 down vs H0	0.00244013	0.00450184	0.579951	-1.72428	H57 down vs H0	0.0176313	0.0247268	0.674431	-1.48273	H81 down vs H0	0.465307	0.757221	0.886657	-1.12783	H312 down vs H0	3.14589	2.15688	3.56522	1
[PS (18:1)] 1-(9Z-octadecenoyl)-sn-glycero-3-phosphoserine	523.291	3.9506	C24H46NO9P	Lipids: Glycerophospholipids	Glycerophosphoserines	Decanoic acid	0.16852	0.188154	0.474013	0.596841	0.530483	-1.88507	H36 down vs H0	0.885479	0.918768	1.14175	1.14175	H42 up vs H0	0.371971	0.413301	2.28873	2.28873	H57 up vs H0	0.0714202	0.0910905	5.15581	5.15581	H81 up vs H0	0.650556	0.895976	1.51844	1.51844	H312 up vs H0	1.70623	36.8747	112.381	1
[FA (18:2)] 9S-hydroperoxy-10E,12Z-octadecadienoic acid	312.23	3.965	C18H32O4	Lipids: Fatty Acyls	Linoleic acid metabolism	Decanoic acid	0.408026	0.430486	0.899226	0.956033	0.950489	-1.05209	H36 down vs H0	0.37854	0.482501	0.689667	-1.44997	H42 down vs H0	0.769107	0.792065	0.884245	-1.13091	H57 down vs H0	0.282695	0.330609	1.54588	1.54588	H81 up vs H0	0.486357	0.774494	0.746116	-1.34027	H312 down vs H0	1.05387	4.71605	23.2699	1
butylene	70.0783	3.98274	C5H10	0	0	butylene	0.00161893	0.00270476	0.00378902	0.0150254	0.484144	-2.0655	H36 down vs H0	0.00256119	0.00772383	0.451546	-2.21461	H42 down vs H0	0.000753857	0.00157148	0.402814	-2.48253	H57 down vs H0	0.00113583	0.0019791	0.434185	-2.30316	H81 down vs H0	0.478837	0.770158	0.842646	-1.18674	H312 down vs H0	5.36121	7.91913	7.681	1
10-Hydroxydecanoic acid	188.141	3.98596	C10H20O3	Lipids: Fatty Acyls	Fatty Acids and Conjugates	Decanoic acid	0.0981315	0.113609	0.161529	0.280401	2.07539	2.07539	H36 up vs H0	0.330993	0.432547	1.68925	1.68925	H42 up vs H0	0.0382955	0.0525326	3.17426	3.17426	H57 up vs H0	0.00806645	0.0119696	4.27943	4.27943	H81 up vs H0	0.412569	0.708141	1.55383	1.55383	H312 up vs H0	2.0958	15.2725	37.8935	1
[PR] 1,13-Dihydroxy-herbertene	234.162	3.98647	C15H22O2	Lipids: Prenols	Isoprenoids	[GL (16:0)] 1-hexadecanoyl-rac-glycerol	0.864487	0.868262	0.78285	0.876894	0.957076	-1.04485	H36 down vs H0	0.740833	0.794985	0.946476	-1.05655	H42 down vs H0	0.519283	0.562489	0.898072	-1.1135	H57 down vs H0	0.567151	0.617247	1.09562	1.09562	H81 up vs H0	0.981926	1	0.996243	-1.00377	H312 down vs H0	0.369999	0.26065	3.6632	1
Nonanoic acid	158.131	4.01243	C9H18O2	Lipids: Fatty Acyls	Fatty Acids and Conjugates	Nonanoic acid	0.368618	0.390102	0.482898	0.603622	1.13014	1.13014	H36 up vs H0	0.450339	0.540407	0.87147	-1.14749	H42 down vs H0	0.829439	0.847871	1.03983	1.03983	H57 up vs H0	0.19897	0.23918	1.25424	1.25424	H81 up vs H0	0.355266	0.651951	1.18406	1.18406	H312 up vs H0	1.13166	0.948697	4.3593	1
[PR] (+)-15-nor-4-thujopsen-3-one	206.167	4.02077	C14H22O	Lipids: Prenols	Isoprenoids	[GL (16:0)] 1-hexadecanoyl-rac-glycerol	0.650026	0.660557	0.181948	0.305169	0.81579	-1.22581	H36 down vs H0	0.175202	0.263376	0.805655	-1.24123	H42 down vs H0	0.72965	0.759364	0.947275	-1.05566	H57 down vs H0	0.550767	0.602265	0.914173	-1.09388	H81 down vs H0	0.718384	0.937751	0.945041	-1.05816	H312 down vs H0	0.669517	0.418774	3.25253	1
[ST hydrox] N-(3alpha,7alpha-dihydroxy-5beta-cholan-24-oyl)-taurine	499.297	4.03211	C26H45NO6S	Lipids: Sterol lipids	Bile acid biosynthesis	[ST hydrox] N-(3alpha,7alpha-dihydroxy-	5.37891e-06	1.81934e-05	0.000131346	0.001177	205.684	205.684	H36 up vs H0	1.93231e-05	0.000168771	641.894	641.894	H42 up vs H0	2.4024e-06	1.2012e-05	1730.95	1730.95	H57 up vs H0	1.70784e-07	1.21485e-06	4374.33	4374.33	H81 up vs H0	5.07172e-05	0.00097208	407.643	407.643	H312 up vs H0	11.7084	468.966	208.28	1
[FA methyl(5:1/5:2/8:0)] methyl 8-[3,5-epidioxy-2-(3-hydroperoxy-1-pentenyl)-cyclopentyl]-octanoate	396.251	4.04752	C22H36O6	Lipids: Fatty Acyls	Fatty Acids and Conjugates	[FA methyl(5:1/5:2/8:0)] methyl 8-[3,5-	0.0209161	0.0279151	0.0941972	0.191729	0.658637	-1.51829	H36 down vs H0	0.00760909	0.0195906	0.483603	-2.06781	H42 down vs H0	0.0021212	0.00400994	0.424607	-2.35512	H57 down vs H0	0.0219031	0.0302263	0.556493	-1.79697	H81 down vs H0	0.357644	0.653133	0.790472	-1.26507	H312 down vs H0	3.24087	5.31525	8.52836	1
Grayanotoxin I	412.246	4.06754	C22H36O7	0	0	[FA methyl(5:1/5:2/8:0)] methyl 8-[3,5-	0.448106	0.467059	0.0603048	0.136876	0.241276	-4.14463	H36 down vs H0	0.586949	0.671633	0.659719	-1.5158	H42 down vs H0	0.57195	0.611853	0.648673	-1.54161	H57 down vs H0	0.516833	0.571498	0.621409	-1.60924	H81 down vs H0	0.841896	0.99689	0.858697	-1.16456	H312 down vs H0	0.980808	14.5892	77.3482	1
4-Hydroxyphenylacetaldehyde	136.052	4.06773	C8H8O2	Amino Acid Metabolism	Tyrosine metabolism__Alkaloid biosynthe		0.00344178	0.00528915	0.0210291	0.0592247	0.0246629	-40.5467	H36 down vs H0	0.00184678	0.00581862	0.00426465	-234.486	H42 down vs H0	0.00141664	0.0028008	0.00361916	-276.307	H57 down vs H0	0.0111659	0.0162541	0.0162808	-61.4219	H81 down vs H0	0.69768	0.936012	0.53882	-1.85591	H312 down vs H0	4.69982	303.063	335.317	1
[FA hydroxy(9:1)] 4-hydroxy-2-nonenal	156.115	4.06863	C9H16O2	Lipids: Fatty Acyls	Fatty aldehydes	Nonanoic acid	0.0026176	0.00414253	0.0646893	0.145393	1.65444	1.65444	H36 up vs H0	0.0509781	0.0963695	1.74671	1.74671	H42 up vs H0	0.0035414	0.00623359	2.39679	2.39679	H57 up vs H0	0.000127218	0.000271766	3.23252	3.23252	H81 up vs H0	0.242625	0.50425	1.38528	1.38528	H312 up vs H0	4.936	9.54133	10.0516	1
[SP (16:0)] N-(hexadecanoyl)-sphing-4-enine-1-phosphate	617.479	4.13892	C34H68NO6P	Lipids: Sphingolipids	Ceramides		0.0198823	0.0267423	0.00112497	0.00597099	1.67482	1.67482	H36 up vs H0	0.00598774	0.0160137	1.55327	1.55327	H42 up vs H0	0.00670526	0.0110685	1.54262	1.54262	H57 up vs H0	0.00418448	0.00645927	1.55622	1.55622	H81 up vs H0	0.0163524	0.0714122	1.45898	1.45898	H312 up vs H0	3.27978	1.84733	2.9289	1
L-Tyrosine methyl ester	195.089	4.14589	C10H13NO3	Amino Acid Metabolism	0	L-Tyrosine methyl ester	0.189015	0.209343	0.269112	0.405431	0.331358	-3.01788	H36 down vs H0	0.642234	0.718697	1.61645	1.61645	H42 up vs H0	0.308531	0.351298	2.88963	2.88963	H57 up vs H0	0.426205	0.481312	2.20498	2.20498	H81 up vs H0	0.229275	0.483792	3.51778	3.51778	H312 up vs H0	1.6234	44.0841	141.208	1
[FA trihydroxy(18:1)] 9S,12S,13S-trihydroxy-10E-octadecenoic acid	330.241	4.15859	C18H34O5	Lipids: Fatty Acyls	Octadecanoids	[FA (8:0)] octanoic acid	0.565902	0.579336	0.534623	0.658732	1.26683	1.26683	H36 up vs H0	0.831959	0.873293	0.919309	-1.08777	H42 down vs H0	0.628817	0.663431	1.21169	1.21169	H57 up vs H0	0.172386	0.208312	1.69444	1.69444	H81 up vs H0	0.872206	1	0.938223	-1.06584	H312 down vs H0	0.790849	3.17032	20.8455	1
Phe-Phe	312.147	4.16124	C18H20N2O3	Peptide(di-)	Hydrophobic peptide		1.92657e-07	1.26603e-06	1.14606e-05	0.000247118	1545.81	1545.81	H36 up vs H0	7.22548e-07	1.61395e-05	9782.72	9782.72	H42 up vs H0	6.44345e-06	2.51185e-05	2928	2928	H57 up vs H0	0.0124429	0.0178494	38.3222	38.3222	H81 up vs H0	1	1	1	1	No change between H312 and H0	16.8699	882.531	272.033	1
Avenacoside A	531.261	4.19918	C51H82O23	0	0	Avenacoside A	7.76603e-08	6.4561e-07	1.11469e-05	0.000247118	429.593	429.593	H36 up vs H0	5.40601e-07	1.38154e-05	2220.82	2220.82	H42 up vs H0	2.87999e-06	1.35183e-05	1032.54	1032.54	H57 up vs H0	1	1	1	1	No change between H81 and H0	0.0099408	0.0504349	25.7842	25.7842	H312 up vs H0	18.5202	657.863	184.711	1
Leu-Leu-Val	343.247	4.2057	C17H33N3O4	Peptide(tri-)	Hydrophobic peptide	Leu-Leu-Val	5.84443e-05	0.000134871	3.45824e-05	0.000487017	28.7331	28.7331	H36 up vs H0	1.47839e-05	0.000137813	41.8559	41.8559	H42 up vs H0	0.000243237	0.000557196	19.8352	19.8352	H57 up vs H0	0.101292	0.127539	3.13749	3.13749	H81 up vs H0	0.00179439	0.0136058	11.5297	11.5297	H312 up vs H0	8.72954	112.244	66.8613	1
[FA (8:0)] octanoic acid	144.115	4.22299	C8H16O2	Lipids: Fatty Acyls	Fatty acid biosynthesis	[FA (8:0)] octanoic acid	0.197296	0.217815	0.0526974	0.12342	2.14795	2.14795	H36 up vs H0	0.780745	0.832633	1.11698	1.11698	H42 up vs H0	0.291855	0.335075	1.52683	1.52683	H57 up vs H0	0.0621508	0.0798586	2.08343	2.08343	H81 up vs H0	0.769055	0.956122	1.12379	1.12379	H312 up vs H0	1.59239	6.40983	20.9315	1
(Z)-4-Hydroxyphenylacetaldehyde-oxime	151.063	4.23085	C8H9NO2	Amino Acid Metabolism	Tyrosine metabolism		0.430761	0.450341	0.274197	0.412192	0.262482	-3.80978	H36 down vs H0	0.167928	0.252992	0.169643	-5.89473	H42 down vs H0	0.09684	0.122157	0.115973	-8.62273	H57 down vs H0	0.431478	0.48647	0.384098	-2.6035	H81 down vs H0	0.968543	1	0.951421	-1.05106	H312 down vs H0	1.01176	41.1746	211.619	1
Bendiocarb	223.085	4.26457	C11H13NO4	0	0	Bendiocarb	0.0302269	0.0389842	0.250844	0.386344	0.330481	-3.02589	H36 down vs H0	0.0131496	0.0307568	0.0727372	-13.7481	H42 down vs H0	0.0152263	0.0228892	0.077426	-12.9156	H57 down vs H0	0.00268362	0.00430628	0.0438013	-22.8304	H81 down vs H0	0.104387	0.288762	0.190723	-5.24319	H312 down vs H0	2.96124	74.6929	131.162	1
[PR] (1S,4R)-1-Hydroxy-2-oxolimonene	168.115	4.26771	C10H16O2	Lipids: Prenols	Isoprenoids	[PR] (1S,4R)-1-Hydroxy-2-oxolimonene	0.418916	0.439957	0.101807	0.200705	0.145902	-6.85391	H36 down vs H0	0.308558	0.407532	0.291988	-3.4248	H42 down vs H0	0.314817	0.356104	0.296739	-3.36997	H57 down vs H0	0.889631	0.908056	0.852968	-1.17238	H81 down vs H0	0.993669	1	0.99055	-1.00954	H312 down vs H0	1.03347	37.7759	190.072	1
[FA (9:2)] 2,6-nonadienoic acid	154.099	4.32364	C9H14O2	Lipids: Fatty Acyls	Fatty Acids and Conjugates	[FA (9:2)] 2,6-nonadienoic acid	0.00785128	0.0112748	0.0227215	0.0619779	0.0520104	-19.2269	H36 down vs H0	0.00145994	0.00484307	0.0106985	-93.4714	H42 down vs H0	0.284008	0.326609	0.247884	-4.03415	H57 down vs H0	0.437069	0.491567	0.381542	-2.62094	H81 down vs H0	0.971473	1	0.955008	-1.04711	H312 down vs H0	4.01313	169.733	219.931	1
Butanal	72.0575	4.32688	C4H8O	Carbohydrate Metabolism	Butanoate metabolism	Butanal	0.176036	0.195281	0.261809	0.39578	0.520012	-1.92303	H36 down vs H0	0.383433	0.487236	1.69535	1.69535	H42 up vs H0	0.22777	0.270036	0.479255	-2.08657	H57 down vs H0	0.703071	0.74864	0.80275	-1.24572	H81 down vs H0	0.46292	0.757221	1.55835	1.55835	H312 up vs H0	1.67476	15.4478	47.9643	1
Leu-Phe	278.163	4.34194	C15H22N2O3	Peptide(di-)	Hydrophobic peptide		3.87959e-05	9.56042e-05	2.62681e-05	0.0004535	142.738	142.738	H36 up vs H0	1.63718e-05	0.000146708	213.648	213.648	H42 up vs H0	3.44788e-05	0.000101668	160.242	160.242	H57 up vs H0	0.00681167	0.0102621	17.5171	17.5171	H81 up vs H0	0.0762453	0.224826	6.54299	6.54299	H312 up vs H0	9.20432	247.835	140.015	1
N-Undecanoylglycine	243.184	4.4084	C13H25NO3	0	0	N-Undecanoylglycine	0.620489	0.631471	0.443518	0.573808	0.731287	-1.36745	H36 down vs H0	0.968144	0.985279	1.01708	1.01708	H42 up vs H0	0.652008	0.684757	0.825596	-1.21125	H57 down vs H0	0.848062	0.872075	1.08094	1.08094	H81 up vs H0	0.194154	0.429379	0.571282	-1.75045	H312 down vs H0	0.711216	3.2651	23.8726	1
[FA (7:0)] heptanoic acid	130.099	4.4214	C7H14O2	Lipids: Fatty Acyls	Fatty Acids and Conjugates	Ethyl (R)-3-hydroxyhexanoate	0.15476	0.173633	0.154813	0.271563	1.42487	1.42487	H36 up vs H0	0.600288	0.681248	0.874696	-1.14325	H42 down vs H0	0.344557	0.387129	1.27503	1.27503	H57 up vs H0	0.0832404	0.105775	1.54541	1.54541	H81 up vs H0	0.13024	0.331608	1.48344	1.48344	H312 up vs H0	1.76761	2.9292	8.61718	1
Ethyl (R)-3-hydroxyhexanoate	160.11	4.45956	C8H16O3	0	0	Ethyl (R)-3-hydroxyhexanoate	0.107958	0.124152	0.23302	0.370218	1.86035	1.86035	H36 up vs H0	0.694941	0.767215	1.23437	1.23437	H42 up vs H0	0.0645505	0.0861505	2.78692	2.78692	H57 up vs H0	0.0119884	0.0173055	3.9487	3.9487	H81 up vs H0	0.416882	0.713768	1.54969	1.54969	H312 up vs H0	2.02695	14.8684	38.1439	1
Glycodeoxycholate	449.314	4.46064	C26H43NO5	Lipid Metabolism	Bile acid biosynthesis	Glycodeoxycholate	5.06516e-07	2.86472e-06	0.000307469	0.00216585	13.1691	13.1691	H36 up vs H0	0.000202154	0.00106069	16.3765	16.3765	H42 up vs H0	1.20265e-06	7.03245e-06	58.2019	58.2019	H57 up vs H0	1.74424e-08	1.91036e-07	142.715	142.715	H81 up vs H0	0.00755651	0.0398015	6.51792	6.51792	H312 up vs H0	15.2349	166.023	56.6673	1
[PE (20:4)] 1-(5Z,8Z,11Z,14Z-eicosatetraenoyl)-sn-glycero-3-phosphoethanolamine	501.285	4.4728	C25H44NO7P	Lipids: Glycerophospholipids	Glycerophosphoethanolamines	[PE (20:4)] 1-(5Z,8Z,11Z,14Z-eicosatetr	0.0704869	0.0837108	0.863892	0.935754	1.17707	1.17707	H36 up vs H0	0.810593	0.856522	0.788104	-1.26887	H42 down vs H0	0.0305841	0.0430673	0.105473	-9.48112	H57 down vs H0	0.454362	0.50812	2.04466	2.04466	H81 up vs H0	0.765152	0.95471	1.34568	1.34568	H312 up vs H0	2.33553	58.779	130.87	1
[PC (15:0)] 1-pentadecanoyl-sn-glycero-3-phosphocholine	481.317	4.47289	C23H48NO7P	Lipids: Glycerophospholipids	Glycerophosphocholines	[PC (15:0)] 1-pentadecanoyl-sn-glycero-	8.81081e-10	1.89983e-08	0.846626	0.920112	0.963489	-1.03789	H36 down vs H0	0.102583	0.173912	1.39999	1.39999	H42 up vs H0	0.000122659	0.000304441	2.45155	2.45155	H57 up vs H0	8.12599e-10	2.24277e-08	5.94955	5.94955	H81 up vs H0	2.2834e-05	0.000547997	2.7826	2.7826	H312 up vs H0	28.5612	29.3817	5.34939	1
[ST hydrox] 3alpha,7alpha-Dihydroxy-5beta-cholan-24-oic Acid	392.293	4.49379	C24H40O4	Lipids: Sterol lipids	Bile acids and derivatives	Ala-Ala-Asp-Arg	0.000437331	0.000829006	0.00347376	0.0141828	33.1042	33.1042	H36 up vs H0	0.000139595	0.000816273	159.471	159.471	H42 up vs H0	0.000152402	0.000368973	153.546	153.546	H57 up vs H0	2.61939e-05	6.69401e-05	256.229	256.229	H81 up vs H0	0.00229101	0.0162969	46.7376	46.7376	H312 up vs H0	6.59374	221.794	174.913	1
[FA hydroxy(7:0)] 2-hydroxy-heptanoic acid	146.094	4.51427	C7H14O3	Lipids: Fatty Acyls	Fatty Acids and Conjugates	[FA hydroxy(7:0)] 2-hydroxy-heptanoic a	0.0961272	0.111475	0.0213821	0.0594906	0.0157862	-63.3464	H36 down vs H0	0.158995	0.241113	0.0768615	-13.0104	H42 down vs H0	0.142887	0.175743	0.0690254	-14.4874	H57 down vs H0	0.647243	0.693474	0.456444	-2.19085	H81 down vs H0	0.896697	1	1.2611	1.2611	H312 up vs H0	2.1107	171.923	423.555	1
Quinolin-2-ol	145.053	4.52618	C9H7NO	0	0	Agroclavine	0.0365141	0.0458086	0.0125864	0.0393459	2.70743	2.70743	H36 up vs H0	0.0108116	0.0263603	2.90228	2.90228	H42 up vs H0	0.0134491	0.020622	2.79888	2.79888	H57 up vs H0	0.114787	0.142709	1.8336	1.8336	H81 up vs H0	0.561501	0.833196	1.2564	1.2564	H312 up vs H0	2.81968	11.0482	20.3748	1
[PE (18:1)] 1-(9Z-octadecenoyl)-sn-glycero-3-phosphoethanolamine	479.301	4.55086	C23H46NO7P	Lipids: Glycerophospholipids	Glycerophosphoethanolamines	Arg-Leu-Phe-Phe	0.214051	0.234437	0.390474	0.525854	0.724412	-1.38043	H36 down vs H0	0.0225584	0.048041	0.392587	-2.54721	H42 down vs H0	0.145197	0.178267	0.560433	-1.78433	H57 down vs H0	0.721158	0.764361	0.875296	-1.14247	H81 down vs H0	0.370326	0.660543	0.703629	-1.4212	H312 down vs H0	1.53333	5.93056	20.1124	1
4,6-Dihydroxyquinoline	161.048	4.55266	C9H7NO2	Amino Acid Metabolism	Tryptophan metabolism		0.421138	0.441619	0.669	0.785735	0.743987	-1.34411	H36 down vs H0	0.468967	0.554088	0.591582	-1.69038	H42 down vs H0	0.171959	0.207072	0.366649	-2.7274	H57 down vs H0	0.279072	0.326927	0.469523	-2.12982	H81 down vs H0	0.597159	0.853084	1.46549	1.46549	H312 up vs H0	1.02936	13.6645	69.0287	1
Leucyl-leucine	244.179	4.56417	C12H24N2O3	Peptide(di-)	Hydrophobic peptide	Ile-Val-Pro-Tyr	0.0009729	0.00170381	0.000489245	0.0031098	13.0336	13.0336	H36 up vs H0	0.000263507	0.00128042	17.1323	17.1323	H42 up vs H0	0.000991947	0.00202498	12.1581	12.1581	H57 up vs H0	0.122547	0.151808	2.79829	2.79829	H81 up vs H0	0.107959	0.292309	3.06795	3.06795	H312 up vs H0	5.8274	68.7428	61.3417	1
Indole-5,6-quinone	147.032	4.56655	C8H5NO2	Amino Acid Metabolism	Tyrosine metabolism	Indole-5,6-quinone	1.245e-06	5.76542e-06	0.00035282	0.00237842	0.127218	-7.86053	H36 down vs H0	1.85439e-05	0.000164042	0.0645952	-15.481	H42 down vs H0	1.0369e-06	6.75697e-06	0.0360625	-27.7297	H57 down vs H0	1.73099e-05	4.66555e-05	0.0716384	-13.959	H81 down vs H0	0.539408	0.814424	0.721768	-1.38549	H312 down vs H0	13.8178	98.8094	37.1845	1
LPA(0:0/18:1(9Z))	436.259	4.57665	C21H41O7P	Lipid Metabolism	Glycerolipid metabolism__Glycerophospho	Arg-Leu-Phe-Phe	0.499418	0.517415	0.303446	0.440795	2.276	2.276	H36 up vs H0	0.477637	0.56148	0.554591	-1.80313	H42 down vs H0	0.553817	0.593876	1.63358	1.63358	H57 up vs H0	0.346271	0.396889	2.12005	2.12005	H81 up vs H0	0.585311	0.853084	1.57157	1.57157	H312 up vs H0	0.894253	15.5753	90.5691	1
Taurocholate	515.292	4.58015	C26H45NO7S	Lipid Metabolism	Bile acid biosynthesis__Taurine and hyp	Taurocholate	8.9281e-08	7.16324e-07	0.0308165	0.0802393	3.67673	3.67673	H36 up vs H0	0.00913663	0.0230083	5.35252	5.35252	H42 up vs H0	5.71169e-06	2.26498e-05	29.3684	29.3684	H57 up vs H0	4.3899e-09	6.88415e-08	135.162	135.162	H81 up vs H0	0.000706319	0.00676889	9.85176	9.85176	H312 up vs H0	18.2595	168.492	47.9838	1
(S)-3-Methyl-2-oxopentanoic acid	130.063	4.61024	C6H10O3	Amino Acid Metabolism	Valine, leucine and isoleucine degradat	(S)-3-Methyl-2-oxopentanoic acid	2.88304e-05	7.39517e-05	0.0357465	0.0906805	3.19815	3.19815	H36 up vs H0	0.000165374	0.000943041	11.1372	11.1372	H42 up vs H0	1.74373e-05	5.59615e-05	17.776	17.776	H57 up vs H0	3.31515e-06	1.19138e-05	21.9567	21.9567	H81 up vs H0	0.00270152	0.0183309	6.15818	6.15818	H312 up vs H0	9.55743	74.7442	40.6668	1
LysoPE(0:0/18:2(9Z,12Z))	477.286	4.61042	C23H44NO7P	Lipids: Glycerophospholipids	Glycerophosphoethanolamines	Arg-Leu-Phe-Phe	0.0647831	0.0776047	0.760437	0.858644	1.13113	1.13113	H36 up vs H0	0.19031	0.280585	0.570259	-1.75359	H42 down vs H0	0.947934	0.953461	1.02792	1.02792	H57 up vs H0	0.0554086	0.0714616	2.23001	2.23001	H81 up vs H0	0.7558	0.951646	1.14028	1.14028	H312 up vs H0	2.397	10.8787	23.6	1
LPA(0:0/18:2(9Z,12Z))	434.243	4.6133	C21H39O7P	Lipid Metabolism	Glycerolipid metabolism__Glycerophospho	Arg-Leu-Phe-Phe	0.0239648	0.0316777	0.00185282	0.00875647	8.41083	8.41083	H36 up vs H0	0.0257396	0.0533342	4.56499	4.56499	H42 up vs H0	0.00981541	0.015635	5.98131	5.98131	H57 up vs H0	0.00830909	0.0123032	5.78691	5.78691	H81 up vs H0	0.204786	0.445748	2.30449	2.30449	H312 up vs H0	3.13693	33.6248	55.739	1
4-Pyridoxolactone	165.042	4.61859	C8H7NO3	Metabolism of Cofactors and Vitamins	Vitamin B6 metabolism	Indole-5,6-quinone	0.00765305	0.0110242	0.00447228	0.0173364	0.0342584	-29.1899	H36 down vs H0	0.0261525	0.0540276	0.069241	-14.4423	H42 down vs H0	0.0131988	0.0202832	0.0491997	-20.3253	H57 down vs H0	0.0038402	0.00598135	0.0320381	-31.2128	H81 down vs H0	0.810144	0.978493	0.759739	-1.31624	H312 down vs H0	4.03389	134.532	173.422	1
Phe-Val	264.147	4.63137	C14H20N2O3	Peptide(di-)	Hydrophobic peptide	Phe-Val	0.0113831	0.0160293	0.022073	0.0609214	17.5869	17.5869	H36 up vs H0	0.0099958	0.0247208	30.5073	30.5073	H42 up vs H0	0.0320265	0.0448242	16.229	16.229	H57 up vs H0	0.783711	0.816858	0.721371	-1.38625	H81 down vs H0	0.0563169	0.179469	11.6705	11.6705	H312 up vs H0	3.71518	146.228	204.67	1
Tetrahydroharmine	216.126	4.63145	C13H16N2O	0	0	Tetrahydroharmine	7.05867e-06	2.33748e-05	1.13463e-05	0.000247118	7.20625	7.20625	H36 up vs H0	3.91982e-06	5.10316e-05	9.18941	9.18941	H42 up vs H0	1.72829e-06	9.03422e-06	10.371	10.371	H57 up vs H0	0.000262195	0.000522874	4.66519	4.66519	H81 up vs H0	0.0280824	0.107055	2.42649	2.42649	H312 up vs H0	11.3416	42.8557	19.6488	1
2-isocapryloyl-3R-hydroxymethyl-&gamma;-butyrolactone	242.152	4.65595	C13H22O4	0	0	2-isocapryloyl-3R-hydroxymethyl-&gamma;	0.0359205	0.0452283	0.18318	0.305915	0.723164	-1.38281	H36 down vs H0	0.0158618	0.0357667	0.527904	-1.89428	H42 down vs H0	0.124632	0.154391	0.675135	-1.48119	H57 down vs H0	0.622287	0.669856	0.888548	-1.12543	H81 down vs H0	0.489801	0.775144	1.18938	1.18938	H312 up vs H0	2.83191	4.51538	8.29123	1
[GP (16:0)] 1-hexadecanoyl-2-sn-glycero-3-phosphate	410.243	4.65738	C19H39O7P	Lipids: Glycerophospholipids	Glycerophosphates	Arg-Leu-Phe-Phe	0.149095	0.167823	0.423583	0.557772	1.41309	1.41309	H36 up vs H0	0.900559	0.931613	0.945491	-1.05765	H42 down vs H0	0.25056	0.293526	1.68546	1.68546	H57 up vs H0	0.04137	0.0547885	2.49114	2.49114	H81 up vs H0	0.0698202	0.212229	2.31634	2.31634	H312 up vs H0	1.79447	9.21233	26.6954	1
[PE (16:0)] 1-hexadecanoyl-sn-glycero-3-phosphoethanolamine	453.286	4.66176	C21H44NO7P	Lipids: Glycerophospholipids	Glycerophosphoethanolamines	[PE (16:0)] 1-hexadecanoyl-sn-glycero-3	0.0621102	0.0747924	0.837453	0.916616	1.07053	1.07053	H36 up vs H0	0.717337	0.78441	0.881863	-1.13396	H42 down vs H0	0.293807	0.336755	1.44492	1.44492	H57 up vs H0	0.034113	0.0457937	2.08664	2.08664	H81 up vs H0	0.0567017	0.179469	1.9839	1.9839	H312 up vs H0	2.42776	7.4531	15.9637	1
[FA oxo,hydroxy(5:1/5:0)] (1S,2R)-3-oxo-2-(5'-hydroxy-2'Z-pentenyl)-cyclopentaneacetic acid	226.121	4.68474	C12H18O4	Lipids: Fatty Acyls	Octadecanoids	[FA oxo,hydroxy(5:1/5:0)] (1S,2R)-3-oxo	0.201449	0.222044	0.119261	0.225453	0.145822	-6.85766	H36 down vs H0	0.971798	0.987541	0.956419	-1.04557	H42 down vs H0	0.0568282	0.076587	0.0830633	-12.039	H57 down vs H0	0.369778	0.422289	0.335934	-2.97678	H81 down vs H0	0.996476	1	0.99445	-1.00558	H312 down vs H0	1.57731	63.9465	210.815	1
Lenacil	234.137	4.69225	C13H18N2O2	0	0	Lenacil	0.000120806	0.000254134	0.00317701	0.0132057	26.3432	26.3432	H36 up vs H0	0.000966001	0.00345358	49.9031	49.9031	H42 up vs H0	1.24547e-05	4.23338e-05	284.813	284.813	H57 up vs H0	0.000128128	0.000272865	91.975	91.975	H81 up vs H0	0.176486	0.410018	4.30773	4.30773	H312 up vs H0	7.92264	227.721	149.464	1
(-)-Sativan	286.12	4.69376	C17H18O4	0	vestitol and sativan biosynthesis		0.0048256	0.0071915	0.012468	0.0393459	0.0645865	-15.4831	H36 down vs H0	0.176131	0.264196	0.227129	-4.40279	H42 down vs H0	0.650484	0.684198	1.63001	1.63001	H57 up vs H0	0.260413	0.30663	3.23519	3.23519	H81 up vs H0	0.617358	0.870265	1.71424	1.71424	H312 up vs H0	4.41403	130.472	153.703	1
Leu-Leu-Pro	341.231	4.70849	C17H31N3O4	Peptide(tri-)	Hydrophobic peptide	Leu-Leu-Pro	7.5948e-05	0.000169593	0.927082	0.975131	1.1492	1.1492	H36 up vs H0	0.0740488	0.131346	18.6437	18.6437	H42 up vs H0	0.000126345	0.00031135	1176.65	1176.65	H57 up vs H0	0.000237417	0.000481818	607.223	607.223	H81 up vs H0	0.400717	0.690236	3.82992	3.82992	H312 up vs H0	8.43344	542.058	334.229	1
Leu-Trp	317.174	4.71475	C17H23N3O3	Peptide(di-)	Hydrophobic peptide	Leu-Trp	0.00160385	0.0026926	0.00234489	0.0105063	7.02856	7.02856	H36 up vs H0	0.00108609	0.00374701	9.2022	9.2022	H42 up vs H0	0.0392571	0.0536385	3.71074	3.71074	H57 up vs H0	0.851432	0.874238	1.1156	1.1156	H81 up vs H0	0.442431	0.742768	1.60181	1.60181	H312 up vs H0	5.36963	50.968	49.3578	1
Leu-Ala-Tyr	365.195	4.71595	C18H27N3O5	Peptide(tri-)	Hydrophobic peptide	Leu-Ala-Tyr	2.16646e-05	5.86219e-05	1	1	1	1	No change between H36 and H0	0.0080624	0.0204524	34.8806	34.8806	H42 up vs H0	2.20152e-05	6.75132e-05	594.68	594.68	H57 up vs H0	0.000299886	0.000589519	140.044	140.044	H81 up vs H0	0.00141194	0.0111982	83.2415	83.2415	H312 up vs H0	9.90474	394.875	207.31	1
3-(3-Hydroxy-phenyl)-propanoic acid	166.063	4.72329	C9H10O3	Amino Acid Metabolism	Phenylalanine metabolism	3-(3-Hydroxy-phenyl)-propanoic acid	0.00243884	0.00389538	0.0286381	0.0751341	6.36445	6.36445	H36 up vs H0	0.010995	0.0266196	9.82109	9.82109	H42 up vs H0	0.00788521	0.0127718	11.0398	11.0398	H57 up vs H0	0.10648	0.133584	3.80239	3.80239	H81 up vs H0	0.331111	0.615812	0.437696	-2.28469	H312 down vs H0	4.99773	90.4944	94.1569	1
Hexanoic acid	116.084	4.73557	C6H12O2	Lipids: Fatty Acyls	OxidationofVeryLongChainFattyAcids	Hexanoic acid	0.075071	0.0880935	0.870511	0.937344	1.06394	1.06394	H36 up vs H0	0.713062	0.780973	0.863992	-1.15742	H42 down vs H0	0.265033	0.307557	1.56506	1.56506	H57 up vs H0	0.0181725	0.0254341	2.58332	2.58332	H81 up vs H0	0.40059	0.690236	1.39938	1.39938	H312 up vs H0	2.28973	9.21073	20.9177	1
Phenylpropanoate	150.068	4.75318	C9H10O2	Amino Acid Metabolism	Phenylalanine metabolism	Phenylpropanoate	0.11778	0.134773	0.439023	0.56941	1.54202	1.54202	H36 up vs H0	0.144939	0.223731	2.37496	2.37496	H42 up vs H0	0.0306858	0.0431226	3.72642	3.72642	H57 up vs H0	0.015218	0.0215615	4.18717	4.18717	H81 up vs H0	0.379512	0.669726	1.67294	1.67294	H312 up vs H0	1.9642	16.9299	44.8199	1
5-Methoxyindoleacetate	205.074	4.76679	C11H11NO3	Amino Acid Metabolism	Tryptophan metabolism	5-Methoxyindoleacetate	0.000352393	0.000679193	0.0655751	0.146186	0.326197	-3.06563	H36 down vs H0	0.000793735	0.00296281	0.0992093	-10.0797	H42 down vs H0	0.000206887	0.000487208	0.0725148	-13.7903	H57 down vs H0	0.109084	0.136108	0.380262	-2.62977	H81 down vs H0	0.944716	1	1.04354	1.04354	H312 up vs H0	6.80827	65.6183	50.1177	1
[FA (7:2)] 2,4-heptadienal	110.073	4.79695	C7H10O	Lipids: Fatty Acyls	Fatty aldehydes	(8S,9S,10S)-8,10-dimethyl-1-octalin	2.55631e-05	6.73226e-05	0.00129157	0.00650588	0.0436026	-22.9344	H36 down vs H0	0.00528633	0.0144173	0.0632024	-15.8222	H42 down vs H0	4.22244e-06	1.80962e-05	0.00522837	-191.264	H57 down vs H0	0.0456856	0.0598161	0.161552	-6.18996	H81 down vs H0	0.883279	1	0.874158	-1.14396	H312 down vs H0	9.70272	207.728	111.328	1
Leu-Val	230.163	4.80558	C11H22N2O3	Peptide(di-)	Hydrophobic peptide	Leu-Val	9.55003e-05	0.000206568	2.99616e-05	0.000470337	48.1679	48.1679	H36 up vs H0	2.52229e-05	0.000209684	60.3035	60.3035	H42 up vs H0	8.34014e-06	3.07738e-05	84.5686	84.5686	H57 up vs H0	0.000173654	0.000363056	28.8808	28.8808	H81 up vs H0	0.000680846	0.00661667	22.0576	22.0576	H312 up vs H0	8.17915	137.014	87.1085	1
(8S,9S,10S)-8,10-dimethyl-1-octalin	82.0782	4.81245	C12H20	0	geosmin biosynthesis	(8S,9S,10S)-8,10-dimethyl-1-octalin	0.00181857	0.00299478	0.0211534	0.0593327	0.0835548	-11.9682	H36 down vs H0	0.0194923	0.0431079	0.0720065	-13.8876	H42 down vs H0	0.000243874	0.000557196	0.0112306	-89.0427	H57 down vs H0	0.116196	0.1442	0.193198	-5.17605	H81 down vs H0	0.945788	1	0.930024	-1.07524	H312 down vs H0	5.25703	152.698	151.042	1
Phe-Tyr	328.142	4.82928	C18H20N2O4	Peptide(di-)	Hydrophobic peptide	Phe-Tyr	1.13992e-07	8.64336e-07	2.19409e-06	8.2621e-05	1841.6	1841.6	H36 up vs H0	2.18487e-07	8.14961e-06	8420.22	8420.22	H42 up vs H0	1.16043e-06	6.90258e-06	3553.29	3553.29	H57 up vs H0	0.000255557	0.0005126	192.906	192.906	H81 up vs H0	0.471299	0.763372	2.58488	2.58488	H312 up vs H0	17.8091	781.968	228.323	1
8-keto-7-aminoperlagonate	185.105	4.83799	C9H15NO3	0	0	8-keto-7-aminoperlagonate	0.0128601	0.0178901	0.012449	0.0393459	0.189087	-5.28856	H36 down vs H0	0.0119867	0.028718	0.173754	-5.75525	H42 down vs H0	0.0145298	0.0220343	0.183338	-5.45442	H57 down vs H0	0.305972	0.354825	0.523251	-1.91113	H81 down vs H0	0.954711	1	1.03785	1.03785	H312 up vs H0	3.61875	39.511	56.7757	1
Leu-Leu-Ser	331.211	4.83987	C15H29N3O5	Peptide(tri-)	Hydrophobic peptide	Leu-Leu-Ser	2.96242e-07	1.85825e-06	6.60314e-06	0.000182247	960.741	960.741	H36 up vs H0	1.57677e-07	6.79981e-06	8512.3	8512.3	H42 up vs H0	3.92997e-07	3.34775e-06	5322.39	5322.39	H57 up vs H0	6.53318e-07	3.36191e-06	2885.56	2885.56	H81 up vs H0	0.0209337	0.0864923	23.0555	23.0555	H312 up vs H0	16.1273	683.61	220.42	1
Myxochlin B	405.19	4.84295	C20H27N3O6	0	0	Myxochlin B	2.43705e-06	9.83373e-06	9.13342e-05	0.00101646	279.99	279.99	H36 up vs H0	1.30334e-05	0.000125783	921.331	921.331	H42 up vs H0	1.28896e-07	1.56031e-06	9257.36	9257.36	H57 up vs H0	5.25393e-07	2.90017e-06	3148.48	3148.48	H81 up vs H0	2.30318e-05	0.000547997	699.292	699.292	H312 up vs H0	12.8207	540.974	219.416	1
N-Butyryl-L-homoserine lactone	171.09	4.85116	C8H13NO3	Lipids: Fatty Acyls	Fatty amides	8-keto-7-aminoperlagonate	0.129899	0.147905	0.061651	0.139017	0.0823448	-12.1441	H36 down vs H0	0.0327902	0.0659628	0.0492528	-20.3034	H42 down vs H0	0.104169	0.130448	0.105564	-9.47296	H57 down vs H0	0.671591	0.717334	0.577991	-1.73013	H81 down vs H0	0.731812	0.943039	0.629668	-1.58814	H312 down vs H0	1.89369	87.8402	241.206	1
Glycocholate	465.309	4.89227	C26H43NO6	Lipid Metabolism	Bile acid biosynthesis	Glycocholate	3.07864e-08	3.03466e-07	0.013431	0.0411884	3.63165	3.63165	H36 up vs H0	0.00988028	0.0246115	4.1108	4.1108	H42 up vs H0	2.35319e-06	1.18518e-05	21.236	21.236	H57 up vs H0	1.47211e-09	3.5026e-08	83.2308	83.2308	H81 up vs H0	9.35753e-05	0.00161417	10.4024	10.4024	H312 up vs H0	20.3226	136.34	34.8856	1
Leu-Leu-Asn	358.222	4.9081	C16H30N4O5	Peptide(tri-)	Hydrophobic peptide	Leu-Leu-Ser	0.000184305	0.000372933	0.0377344	0.094336	22.0627	22.0627	H36 up vs H0	0.000552246	0.00222723	333.384	333.384	H42 up vs H0	2.65172e-05	7.9899e-05	1830.23	1830.23	H57 up vs H0	7.80063e-05	0.000177638	746.019	746.019	H81 up vs H0	0.0465749	0.153032	21.85	21.85	H312 up vs H0	7.47259	423.504	294.707	1
Cholate	408.288	4.90942	C24H40O5	Lipids: Sterol lipids	Bile acid biosynthesis	Cholate	6.12179e-05	0.000140647	0.0335903	0.0864825	3.51731	3.51731	H36 up vs H0	0.00180922	0.00572802	7.64678	7.64678	H42 up vs H0	0.000295901	0.000662895	11.5224	11.5224	H57 up vs H0	1.71524e-06	7.10417e-06	31.2515	31.2515	H81 up vs H0	0.0217135	0.0891803	4.17771	4.17771	H312 up vs H0	8.67672	77.3805	46.3745	1
Leu-Val-Pro	327.216	4.93511	C16H29N3O4	Peptide(tri-)	Hydrophobic peptide	Leu-Val-Pro	2.03915e-05	5.56131e-05	0.0164549	0.048521	6.5396	6.5396	H36 up vs H0	0.00613381	0.0163021	9.79029	9.79029	H42 up vs H0	2.55308e-06	1.24727e-05	97.3267	97.3267	H57 up vs H0	5.85264e-06	1.90487e-05	63.3635	63.3635	H81 up vs H0	0.0147005	0.0662615	7.38112	7.38112	H312 up vs H0	9.9793	151.867	79.1348	1
Leu-Leu-Gln	372.237	4.9405	C17H32N4O5	Peptide(tri-)	Hydrophobic peptide		0.00676414	0.00984654	0.782125	0.876894	0.678874	-1.47303	H36 down vs H0	0.1989	0.289537	6.74332	6.74332	H42 up vs H0	0.0042067	0.00723845	93.8753	93.8753	H57 up vs H0	0.0113276	0.0164548	43.7352	43.7352	H81 up vs H0	0.0663881	0.20359	16.0264	16.0264	H312 up vs H0	4.13459	225.461	283.558	1
Agroclavine	119.074	4.94233	C16H18N2	0	0	Agroclavine	1.0984e-06	5.26315e-06	9.02253e-05	0.00101646	3.3806	3.3806	H36 up vs H0	5.85236e-06	6.65893e-05	4.75046	4.75046	H42 up vs H0	1.01012e-07	1.26724e-06	7.38724	7.38724	H57 up vs H0	6.15011e-07	3.28818e-06	5.60113	5.60113	H81 up vs H0	0.0047334	0.0284004	2.33873	2.33873	H312 up vs H0	14.0095	27.5677	10.2325	1
Ala-Val-Val-Pro	384.237	4.94737	C18H32N4O5	Peptide(tetra-)	Hydrophobic peptide	Ala-Val-Val-Pro	0.000231042	0.000459421	0.000491259	0.0031098	1881.97	1881.97	H36 up vs H0	0.000242707	0.00118771	4484.24	4484.24	H42 up vs H0	0.000304638	0.000680261	3778.15	3778.15	H57 up vs H0	0.00390645	0.00605719	402.998	402.998	H81 up vs H0	0.59035	0.853084	2.93963	2.93963	H312 up vs H0	7.2374	736.886	529.445	1
N6-Methyl-2'-deoxyadenosine	265.118	4.95427	C11H15N5O3	0	0	Agroclavine	1.57555e-05	4.49227e-05	0.000292188	0.0021001	36.1618	36.1618	H36 up vs H0	0.000197704	0.00105895	48.4666	48.4666	H42 up vs H0	6.90935e-06	2.66338e-05	151.874	151.874	H57 up vs H0	6.32246e-06	2.01967e-05	126.27	126.27	H81 up vs H0	0.132968	0.336072	4.01773	4.01773	H312 up vs H0	10.3007	215.44	108.759	1
Leu-Tyr	294.158	4.96695	C15H22N2O4	Peptide(di-)	Hydrophobic peptide	Leu-Tyr	0.000277474	0.000542372	0.0166107	0.048772	12.6403	12.6403	H36 up vs H0	0.0161091	0.0362061	14.3473	14.3473	H42 up vs H0	0.301839	0.344246	2.97474	2.97474	H57 up vs H0	0.0360915	0.0482619	0.11192	-8.93494	H81 down vs H0	0.890914	1	1.15411	1.15411	H312 up vs H0	7.04964	196.426	144.889	1
Suberic acid	174.089	4.97129	C8H14O4	Lipids: Fatty Acyls	Fatty Acids and Conjugates	Suberic acid	0.244317	0.265478	0.186719	0.310449	0.629142	-1.58947	H36 down vs H0	0.0347377	0.069075	0.451489	-2.2149	H42 down vs H0	0.0930854	0.118285	0.536758	-1.86304	H57 down vs H0	0.456818	0.510039	0.772508	-1.29449	H81 down vs H0	0.691207	0.933333	0.866444	-1.15414	H312 down vs H0	1.43708	4.76248	17.2328	1
Nitroethane	75.032	4.97908	C2H5NO2	0	0		0.000711595	0.00127533	0.00119394	0.00624106	0.138875	-7.2007	H36 down vs H0	0.00128391	0.00434262	0.129266	-7.73598	H42 down vs H0	6.61404e-05	0.000180383	0.067958	-14.715	H57 down vs H0	0.000563874	0.00106304	0.118623	-8.43006	H81 down vs H0	0.122351	0.320996	0.404439	-2.47256	H312 down vs H0	6.12202	51.1785	43.4706	1
N-Phenylacetamide	135.068	4.98098	C8H9NO	0	0	2-Phenylacetamide	1.05338e-05	3.27402e-05	1.41309e-05	0.000286774	4.13777	4.13777	H36 up vs H0	3.83857e-06	5.09349e-05	5.06449	5.06449	H42 up vs H0	2.03489e-05	6.2682e-05	4.24058	4.24058	H57 up vs H0	0.0649742	0.0831766	1.67119	1.67119	H81 up vs H0	0.00436475	0.027034	2.3847	2.3847	H312 up vs H0	10.8148	21.7992	10.4815	1
Leu-Pro-Tyr	391.211	4.99634	C20H29N3O5	Peptide(tri-)	Hydrophobic peptide	Leu-Pro-Tyr	0.00196423	0.00321165	0.870779	0.937344	0.766763	-1.30418	H36 down vs H0	0.404181	0.503785	0.238877	-4.18626	H42 down vs H0	0.0117275	0.0181435	97.2504	97.2504	H57 up vs H0	0.00973445	0.014291	90.9608	90.9608	H81 up vs H0	0.0791586	0.229493	21.8739	21.8739	H312 up vs H0	5.18845	384.841	385.697	1
Phe-Ala	236.116	5.0024	C12H16N2O3	Peptide(di-)	Hydrophobic peptide	Phe-Ala	2.59567e-06	1.04129e-05	1.40579e-06	6.92852e-05	544.439	544.439	H36 up vs H0	3.79672e-07	1.09156e-05	1245.4	1245.4	H42 up vs H0	1.45933e-06	8.05932e-06	709.401	709.401	H57 up vs H0	0.000647602	0.0012012	50.6813	50.6813	H81 up vs H0	1.82146e-05	0.000502722	253.866	253.866	H312 up vs H0	12.7296	370.837	151.485	1
Leu-Val-Gly	287.185	5.00391	C13H25N3O4	Peptide(tri-)	Hydrophobic peptide	Leu-Val-Gly	4.77627e-09	7.01197e-08	7.37673e-06	0.000188516	1162.98	1162.98	H36 up vs H0	1.27965e-06	2.38638e-05	3899.2	3899.2	H42 up vs H0	2.7259e-08	5.45476e-07	30719.7	30719.7	H57 up vs H0	1.10538e-08	1.31756e-07	32222.5	32222.5	H81 up vs H0	0.370479	0.660543	3.33588	3.33588	H312 up vs H0	24.363	1107.63	236.411	1
N3-methylthymine	140.058	5.00541	C6H8N2O2	0	0		5.58116e-08	5.06711e-07	6.28117e-06	0.000180584	38.16	38.16	H36 up vs H0	9.84264e-08	5.22417e-06	135.93	135.93	H42 up vs H0	1.31367e-08	3.35716e-07	240.423	240.423	H57 up vs H0	1.12779e-08	1.31894e-07	198.625	198.625	H81 up vs H0	0.000124821	0.00195742	20.8532	20.8532	H312 up vs H0	19.1492	226.698	61.5602	1
Phe-Pro	262.132	5.00614	C14H18N2O3	Peptide(di-)	Hydrophobic peptide	Phe-Pro	0.000105543	0.000226868	0.000375446	0.00249094	70.0397	70.0397	H36 up vs H0	0.000187739	0.00103061	112.729	112.729	H42 up vs H0	7.66338e-06	2.88947e-05	421.933	421.933	H57 up vs H0	1.1122e-05	3.22444e-05	281.298	281.298	H81 up vs H0	0.000930458	0.00823097	57.8783	57.8783	H312 up vs H0	8.06949	247.922	159.761	1
3-acetamidopropanal	115.063	5.00707	C5H9NO2	0	spermine and spermidine degradation	Agroclavine	2.52956e-07	1.61611e-06	0.0977514	0.197218	1.64703	1.64703	H36 up vs H0	0.0039332	0.0113079	2.61215	2.61215	H42 up vs H0	4.03377e-07	3.35338e-06	7.66224	7.66224	H57 up vs H0	1.26809e-07	9.79983e-07	8.04693	8.04693	H81 up vs H0	0.0107793	0.0527498	2.30123	2.30123	H312 up vs H0	16.3971	39.2739	12.4549	1
Diacetylmonoxime	101.048	5.0117	C4H7NO2	0	0	Agroclavine	0.0152722	0.0209916	0.0050345	0.0192989	11.893	11.893	H36 up vs H0	0.00267471	0.00795496	16.4712	16.4712	H42 up vs H0	0.0216576	0.0312058	7.86188	7.86188	H57 up vs H0	0.000781039	0.00141448	21.5968	21.5968	H81 up vs H0	0.0156487	0.0689919	8.87224	8.87224	H312 up vs H0	3.48403	64.5666	96.3674	1
3-Methyl-2-oxobutanoic acid	116.047	5.01892	C5H8O3	Amino Acid Metabolism	Valine, leucine and isoleucine degradat	3-Methyl-2-oxobutanoic acid	2.57893e-05	6.76602e-05	0.787297	0.880446	1.08266	1.08266	H36 up vs H0	0.351033	0.454043	1.33501	1.33501	H42 up vs H0	0.131882	0.16308	1.60532	1.60532	H57 up vs H0	4.56202e-06	1.55064e-05	5.35714	5.35714	H81 up vs H0	0.011347	0.0547511	2.29128	2.29128	H312 up vs H0	9.69204	23.3435	12.5243	1
N,N-Dimethylformamide	73.0528	5.01954	C3H7NO	0	0		0.162421	0.181932	0.171251	0.291042	2.39376	2.39376	H36 up vs H0	0.111355	0.186492	2.90923	2.90923	H42 up vs H0	0.791371	0.811866	1.18907	1.18907	H57 up vs H0	0.0255217	0.0348712	4.34872	4.34872	H81 up vs H0	0.663092	0.909609	1.33046	1.33046	H312 up vs H0	1.73281	18.9264	56.7963	1
Chaksine	225.148	5.02629	C22H38N6O4	0	0	Chaksine	1.09524e-05	3.38376e-05	0.00953322	0.032476	1.71152	1.71152	H36 up vs H0	0.000555195	0.00222723	2.20097	2.20097	H42 up vs H0	7.00946e-06	2.68696e-05	3.07205	3.07205	H57 up vs H0	5.46353e-07	2.99193e-06	3.54432	3.54432	H81 up vs H0	0.000272026	0.00347588	2.32481	2.32481	H312 up vs H0	10.7643	11.2622	5.44048	1
Leu-Pro-Pro	325.2	5.0479	C16H27N3O4	Peptide(tri-)	Hydrophobic peptide	Leu-Pro-Pro	4.97214e-08	4.57437e-07	1	1	1	1	No change between H36 and H0	0.350694	0.454043	2.52678	2.52678	H42 up vs H0	0.00160486	0.00309318	31.0347	31.0347	H57 up vs H0	5.78048e-08	5.06257e-07	1102.78	1102.78	H81 up vs H0	1	1	1	1	No change between H312 and H0	19.373	479.526	128.712	1
Leu-Gln-Pro	356.206	5.06178	C16H28N4O5	Peptide(tri-)	Hydrophobic peptide		3.54104e-13	4.07219e-11	0.114179	0.218843	0.373978	-2.67395	H36 down vs H0	0.129666	0.207242	0.373978	-2.67395	H42 down vs H0	4.99931e-08	8.30334e-07	115.868	115.868	H57 up vs H0	1.47484e-10	5.65354e-09	455.976	455.976	H81 up vs H0	3.91663e-07	3.00294e-05	68.3834	68.3834	H312 up vs H0	56.9324	585.019	53.4336	1
2-Methylbutyrylglycine	159.089	5.07577	C7H13NO3	0	0	Gentioflavine	0.317033	0.339152	0.90113	0.956584	0.956516	-1.04546	H36 down vs H0	0.528824	0.612229	0.789561	-1.26653	H42 down vs H0	0.214255	0.254889	0.624245	-1.60194	H57 down vs H0	0.415433	0.469916	1.34082	1.34082	H81 up vs H0	0.556872	0.829895	1.24644	1.24644	H312 up vs H0	1.24505	4.43777	18.5346	1
valeronitrile	83.0735	5.0827	C5H9N	0	0	Piperideine	1.19071e-05	3.57213e-05	0.000141424	0.00123522	3.29786	3.29786	H36 up vs H0	2.70371e-05	0.000217272	4.14408	4.14408	H42 up vs H0	3.20238e-06	1.46334e-05	5.20625	5.20625	H57 up vs H0	4.5035e-06	1.53832e-05	4.68516	4.68516	H81 up vs H0	0.0332138	0.119033	1.87587	1.87587	H312 up vs H0	10.6566	21.6938	10.5857	1
Glu-Phe-Val	393.19	5.17828	C19H27N3O6	Peptide(tri-)	Hydrophobic peptide	Dethiobiotin	9.2017e-08	7.2979e-07	0.168202	0.286566	0.332396	-3.00846	H36 down vs H0	0.00104187	0.00370562	19.989	19.989	H42 up vs H0	6.01819e-06	2.37289e-05	98.4511	98.4511	H57 up vs H0	1.84153e-05	4.906e-05	58.1144	58.1144	H81 up vs H0	0.000233485	0.00322209	31.8618	31.8618	H312 up vs H0	18.2034	311.924	89.1046	1
Phenol sulfate	173.999	5.74504	C6H6O4S	0	0	Phenol sulfate	0.048634	0.0605731	0.152485	0.269781	1.58346	1.58346	H36 up vs H0	0.737069	0.794296	0.895369	-1.11686	H42 down vs H0	0.321854	0.363468	0.719716	-1.38944	H57 down vs H0	0.15763	0.191825	1.57412	1.57412	H81 up vs H0	0.364757	0.659039	0.740498	-1.35044	H312 down vs H0	2.60719	7.19459	14.3495	1
p-Benzenediol	110.037	5.89828	C6H6O2	Amino Acid Metabolism	Tyrosine metabolism__gamma-Hexachlorocy	3-Sulfocatechol	0.0320366	0.0411644	0.980027	1	1.00849	1.00849	H36 up vs H0	0.44941	0.540407	0.764682	-1.30773	H42 down vs H0	0.0114362	0.0177725	0.386432	-2.58777	H57 down vs H0	0.519663	0.57302	0.803869	-1.24398	H81 down vs H0	0.429956	0.725354	1.32325	1.32325	H312 up vs H0	2.91755	9.26371	16.5109	1
Phenylacetylglycine	193.074	6.19411	C10H11NO3	Amino Acid Metabolism	Phenylalanine metabolism	Phenylacetylglycine	0.0125829	0.0175398	0.0176072	0.051046	2.56617	2.56617	H36 up vs H0	0.00171428	0.0055533	3.88635	3.88635	H42 up vs H0	0.037931	0.0522403	2.33787	2.33787	H57 up vs H0	0.00257099	0.00415453	3.45559	3.45559	H81 up vs H0	0.316026	0.600823	1.48735	1.48735	H312 up vs H0	3.63593	14.2638	20.3997	1
2-Hydroxypyridine	95.0371	6.20671	C5H5NO	0	0	2-Hydroxypyridine	3.99534e-08	3.72539e-07	0.0691833	0.153002	0.566094	-1.76649	H36 down vs H0	0.00030985	0.00143393	0.27161	-3.68174	H42 down vs H0	1.67617e-08	3.8552e-07	0.0808358	-12.3708	H57 down vs H0	8.30539e-08	6.74202e-07	0.110053	-9.08652	H81 down vs H0	2.15841e-05	0.000547997	0.197852	-5.05429	H312 down vs H0	19.802	50.6391	13.2978	1
(Z)-Phenylacetaldehyde oxime	135.068	6.24693	C8H9NO	Xenobiotics Biodegradation and Metaboli	Styrene degradation	2-Phenylacetamide	0.000543111	0.00100738	0.00035504	0.00237842	6.77551	6.77551	H36 up vs H0	4.78081e-05	0.000336608	10.6854	10.6854	H42 up vs H0	0.000109726	0.000276317	9.16809	9.16809	H57 up vs H0	0.00785284	0.0116777	3.82827	3.82827	H81 up vs H0	0.0121111	0.0576323	3.71699	3.71699	H312 up vs H0	6.38182	39.343	32.0572	1
2-Pyridyl hydroxymethane sulfonic acid	189.009	6.33706	C6H7NO4S	0	0	2-Pyridyl hydroxymethane sulfonic acid	0.353443	0.375771	0.559812	0.680559	1.2393	1.2393	H36 up vs H0	0.734652	0.794296	0.878124	-1.13879	H42 down vs H0	0.252364	0.295137	0.641412	-1.55906	H57 down vs H0	0.85963	0.881345	1.06702	1.06702	H81 up vs H0	0.224054	0.477151	0.623451	-1.60398	H312 down vs H0	1.1635	4.35622	19.4692	1
4-Nitroaniline	69.0215	6.3449	C6H6N2O2	0	0	Urocanate	4.49985e-05	0.000108563	0.00377602	0.0150254	0.527726	-1.89492	H36 down vs H0	0.000591702	0.00234475	0.44022	-2.27159	H42 down vs H0	8.8361e-05	0.000229207	0.378136	-2.64455	H57 down vs H0	2.2032e-06	8.58876e-06	0.296928	-3.36782	H81 down vs H0	0.072806	0.218418	0.675419	-1.48056	H312 down vs H0	9.03081	10.3486	5.95879	1
Acetohydroxamic acid	75.032	6.41379	C2H5NO2	Xenobiotics Drugs etc	0	Nitroethane	0.409326	0.431199	0.453096	0.577886	1.29354	1.29354	H36 up vs H0	0.119414	0.198066	1.76531	1.76531	H42 up vs H0	0.533286	0.574949	1.24963	1.24963	H57 up vs H0	0.171714	0.207865	1.6079	1.6079	H81 up vs H0	0.845436	0.99689	0.932866	-1.07197	H312 down vs H0	1.05141	3.40742	16.8521	1
2-Carboxy-2,3-dihydro-5,6-dihydroxyindole	195.053	6.42902	C9H9NO4	Amino Acid Metabolism	Tyrosine metabolism	Dopaquinone	0.0741616	0.0871746	0.244697	0.380481	0.221593	-4.51278	H36 down vs H0	0.0299299	0.0611531	0.0479674	-20.8475	H42 down vs H0	0.158953	0.192417	0.146949	-6.80508	H57 down vs H0	0.895117	0.912306	0.844894	-1.18358	H81 down vs H0	0.596381	0.853084	2.03201	2.03201	H312 up vs H0	2.29858	104.567	236.559	1
N-Acetylmethionine	191.062	6.43037	C7H13NO3S	0	0	N-Acetylmethionine	9.67804e-12	4.76989e-10	0.000180568	0.00141582	36.3766	36.3766	H36 up vs H0	2.65628e-08	1.83283e-06	840.964	840.964	H42 up vs H0	5.09298e-10	3.19469e-08	3813.31	3813.31	H57 up vs H0	1.21184e-10	5.57448e-09	4725	4725	H81 up vs H0	1	1	1	1	No change between H312 and H0	42.8343	824.965	100.149	1
Triacetylene	74.0156	6.67757	C6H2	0	0	9,10-Anthraquinone	0.0336605	0.0428519	0.0405756	0.0999898	0.482345	-2.0732	H36 down vs H0	0.0143806	0.0330753	0.395807	-2.52649	H42 down vs H0	0.00656906	0.0108958	0.352065	-2.84038	H57 down vs H0	0.108533	0.135913	0.569948	-1.75455	H81 down vs H0	0.711387	0.93748	0.876194	-1.1413	H312 down vs H0	2.88048	9.35561	16.8892	1
Arene oxide	94.0418	6.71828	C6H6O	0	0	9,10-Anthraquinone	0.00259432	0.00411514	0.0330227	0.0854157	0.415783	-2.4051	H36 down vs H0	0.00616643	0.0163021	0.297166	-3.36512	H42 down vs H0	0.000336742	0.000744718	0.186467	-5.36289	H57 down vs H0	0.0842977	0.106922	0.49678	-2.01297	H81 down vs H0	0.755118	0.951646	0.879571	-1.13692	H312 down vs H0	4.94378	21.3165	22.4213	1
5-Oxopentanoate	116.047	6.86586	C5H8O3	Amino Acid Metabolism	Lysine degradation	3-Methyl-2-oxobutanoic acid	0.00342929	0.00528171	0.566452	0.683307	0.856745	-1.16721	H36 down vs H0	0.923156	0.947884	1.02746	1.02746	H42 up vs H0	0.847509	0.864056	1.0555	1.0555	H57 up vs H0	0.00149973	0.00252393	2.5723	2.5723	H81 up vs H0	0.39717	0.690236	1.27051	1.27051	H312 up vs H0	4.70293	9.46318	10.4634	1
Gly-His	212.091	7.21836	C8H12N4O3	Peptide(di-)	Basic peptide	Gly-His	0.0218038	0.0289876	0.537268	0.660811	0.482983	-2.07047	H36 down vs H0	0.606259	0.686894	0.530291	-1.88576	H42 down vs H0	0.0151858	0.0228892	0.0424085	-23.5802	H57 down vs H0	0.00449823	0.00692808	0.0267797	-37.3417	H81 down vs H0	0.312412	0.59831	0.285801	-3.49894	H312 down vs H0	3.20904	123.405	199.968	1
Pyridine	79.0421	7.2654	C5H5N	0	0	Pyridine	9.17826e-05	0.000199151	0.000144779	0.00124872	0.197936	-5.05213	H36 down vs H0	0.000132542	0.000781659	0.181849	-5.49908	H42 down vs H0	0.00191385	0.00364795	0.268869	-3.71929	H57 down vs H0	0.000187427	0.000384895	0.205131	-4.87494	H81 down vs H0	0.543658	0.815487	0.791258	-1.26381	H312 down vs H0	8.22292	30.9688	19.584	1
D-Tyrosine	181.074	7.27036	C9H11NO3	Amino Acid Metabolism	0	Otonecine	0.00955135	0.0135606	0.0330521	0.0854157	0.244912	-4.0831	H36 down vs H0	0.0217308	0.0467111	0.203156	-4.92233	H42 down vs H0	0.0109028	0.0170588	0.166992	-5.98833	H57 down vs H0	0.779219	0.813405	0.83776	-1.19366	H81 down vs H0	0.791825	0.967008	1.19013	1.19013	H312 up vs H0	3.85508	42.7332	57.6415	1
Otonecine	185.105	7.31357	C9H15NO3	0	0	Otonecine	0.110562	0.126935	0.152055	0.269713	0.41382	-2.41651	H36 down vs H0	0.239091	0.335994	0.47119	-2.12229	H42 down vs H0	0.3427	0.385747	0.546839	-1.82869	H57 down vs H0	0.447057	0.501576	1.58665	1.58665	H81 up vs H0	0.517254	0.798446	1.50684	1.50684	H312 up vs H0	2.00977	20.3941	52.7667	1
Lumichrome	242.08	7.32505	C12H10N4O2	Metabolism of Cofactors and Vitamins	Riboflavin metabolism	Lumichrome	0.0851595	0.0995933	0.425931	0.558856	0.779283	-1.28323	H36 down vs H0	0.0156658	0.0355572	0.434859	-2.2996	H42 down vs H0	0.213279	0.254166	0.663081	-1.50811	H57 down vs H0	0.286244	0.334194	0.714853	-1.39889	H81 down vs H0	0.700754	0.936169	1.13329	1.13329	H312 up vs H0	2.1983	5.93071	14.0289	1
[FA oxo,amino(6:0)] 3-oxo-5S-amino-hexanoic acid	145.074	7.3279	C6H11NO3	Amino Acid Metabolism	Lysine degradation	Indoxylsulfate	0.136195	0.15431	0.281249	0.418237	0.74443	-1.34331	H36 down vs H0	0.63264	0.710948	0.873274	-1.14512	H42 down vs H0	0.0236446	0.0339185	0.50996	-1.96094	H57 down vs H0	0.637501	0.684099	0.87996	-1.13642	H81 down vs H0	0.770832	0.956579	1.08595	1.08595	H312 up vs H0	1.85962	3.79689	10.6172	1
Ile-Phe-Thr-Pro	238.132	7.32827	C24H36N4O6	Peptide(tetra-)	Hydrophobic peptide	Ile-Phe-Thr-Pro	0.366546	0.388505	0.388556	0.524665	0.86569	-1.15515	H36 down vs H0	0.161983	0.245106	0.78094	-1.28051	H42 down vs H0	0.0887165	0.113781	0.738013	-1.35499	H57 down vs H0	0.956602	0.963585	0.991004	-1.00908	H81 down vs H0	0.744945	0.944876	0.945084	-1.05811	H312 down vs H0	1.13594	0.872123	3.99233	1
Phosphonoacetaldehyde	123.993	7.34806	C2H5O4P	Amino Acid Metabolism	Aminophosphonate metabolism	Phosphonoacetaldehyde	0.0619454	0.0747243	0.0212557	0.0593782	1.85383	1.85383	H36 up vs H0	0.185167	0.274755	1.43037	1.43037	H42 up vs H0	0.0113735	0.0177149	2.04694	2.04694	H57 up vs H0	0.0051752	0.0079353	2.15682	2.15682	H81 up vs H0	0.0737786	0.219428	1.63224	1.63224	H312 up vs H0	2.4297	4.37159	9.35599	1
5-Hydroxypentanoate	118.063	7.35762	C5H10O3	Lipids: Fatty Acyls	Fatty Acids and Conjugates	5-Hydroxypentanoate	0.000117146	0.000247516	5.3753e-05	0.000662313	16.8579	16.8579	H36 up vs H0	3.3856e-05	0.00025392	21.2759	21.2759	H42 up vs H0	0.000375824	0.000828494	12.1653	12.1653	H57 up vs H0	0.000968168	0.00171732	8.83517	8.83517	H81 up vs H0	0.1602	0.386498	2.42198	2.42198	H312 up vs H0	7.95596	77.492	50.6486	1
LysoPE(0:0/18:1(11Z))	479.302	7.35838	C23H46NO7P	Lipids: Glycerophospholipids	Glycerophosphoethanolamines	[PE (18:1)] 1-(9Z-octadecenoyl)-sn-glyc	0.0587309	0.0714715	0.288015	0.424637	0.646752	-1.54619	H36 down vs H0	0.0103912	0.0255157	0.313735	-3.18741	H42 down vs H0	0.0219759	0.0315903	0.35969	-2.78017	H57 down vs H0	0.340454	0.390871	0.676956	-1.4772	H81 down vs H0	0.698618	0.936012	0.8485	-1.17855	H312 down vs H0	2.46866	11.3098	23.823	1
(S)-Methylmalonate semialdehyde	102.032	7.36099	C4H6O3	Amino Acid Metabolism	Valine, leucine and isoleucine degradat	2-Oxobutanoate	1.39578e-07	9.82745e-07	0.000926284	0.00511309	5.26098	5.26098	H36 up vs H0	0.000473211	0.00197888	6.38758	6.38758	H42 up vs H0	8.00225e-06	3.00085e-05	13.1194	13.1194	H57 up vs H0	4.79078e-09	7.03328e-08	44.9986	44.9986	H81 up vs H0	3.91688e-07	3.00294e-05	22.6539	22.6539	H312 up vs H0	17.4423	97.7549	29.1433	1
Ile-Val-Gly-Pro	384.238	7.36241	C18H32N4O5	Peptide(tetra-)	Hydrophobic peptide	Ala-Val-Val-Pro	1.00174e-07	7.68294e-07	8.39462e-07	4.51771e-05	13053.4	13053.4	H36 up vs H0	6.73289e-07	1.60196e-05	22753.5	22753.5	H42 up vs H0	1.12793e-06	6.82695e-06	16633	16633	H57 up vs H0	3.36768e-05	8.44981e-05	1601.71	1601.71	H81 up vs H0	0.536925	0.812452	2.624	2.624	H312 up vs H0	18.0463	1115.86	321.534	1
Ala-Leu-Pro-Ser	386.216	7.36565	C17H30N4O6	Peptide(tetra-)	Hydrophobic peptide	2-Phenylacetamide	0.00163269	0.00272114	0.00650689	0.0238817	57.5424	57.5424	H36 up vs H0	0.00326769	0.00955383	102.965	102.965	H42 up vs H0	0.00248981	0.00457613	120.3	120.3	H57 up vs H0	0.00378678	0.00591149	77.9202	77.9202	H81 up vs H0	1	1	1	1	No change between H312 and H0	5.3536	285.092	276.912	1
Quinolin-4-ol	145.053	7.36586	C9H7NO	0	0	Isoquinoline	0.0147728	0.0204273	0.113332	0.217824	0.696631	-1.43548	H36 down vs H0	0.00460075	0.0129572	0.48944	-2.04315	H42 down vs H0	0.00138207	0.00274031	0.438241	-2.28185	H57 down vs H0	0.0438674	0.0575447	0.626686	-1.5957	H81 down vs H0	0.310782	0.597325	0.788054	-1.26895	H312 down vs H0	3.50998	4.84833	7.18275	1
L-Adrenaline	183.09	7.36705	C9H13NO3	Amino Acid Metabolism	Tyrosine metabolism	Otonecine	0.171672	0.191362	0.115678	0.219964	0.136701	-7.31526	H36 down vs H0	0.128607	0.207242	0.134743	-7.42155	H42 down vs H0	0.450559	0.493469	0.375972	-2.65978	H57 down vs H0	0.804996	0.836517	1.35657	1.35657	H81 up vs H0	0.702306	0.936169	1.63806	1.63806	H312 up vs H0	1.69287	71.827	220.631	1
2-hydroxy-4-methylthiobutanoate	150.035	7.36713	C5H10O3S	0	dimethylsulfoniopropionate biosynthesis	5-Hydroxypentanoate	1.51987e-08	1.6592e-07	1.60954e-06	7.32072e-05	890.375	890.375	H36 up vs H0	1.30308e-07	5.99417e-06	3813.71	3813.71	H42 up vs H0	7.42803e-07	5.17711e-06	1707.61	1707.61	H57 up vs H0	6.01355e-06	1.92993e-05	507.796	507.796	H81 up vs H0	1	1	1	1	No change between H312 and H0	21.7858	750.342	179.097	1
Val-Val-Ala	287.185	7.36955	C13H25N3O4	Peptide(tri-)	Hydrophobic peptide	Leu-Val-Gly	2.28915e-08	2.35748e-07	4.89329e-05	0.000649302	503.673	503.673	H36 up vs H0	4.96415e-05	0.000342526	659.384	659.384	H42 up vs H0	2.03332e-07	2.09402e-06	11459.3	11459.3	H57 up vs H0	1.15072e-07	9.02265e-07	10354.8	10354.8	H81 up vs H0	1	1	1	1	No change between H312 and H0	20.9273	974.451	242.131	1
Methohexital	262.132	7.3698	C14H18N2O3	Xenobiotics Drugs etc	0	Leu-Pro	2.76955e-09	4.54997e-08	2.00749e-07	1.38517e-05	956.752	956.752	H36 up vs H0	8.88511e-09	8.75818e-07	4946.38	4946.38	H42 up vs H0	4.86056e-10	3.19469e-08	18951.1	18951.1	H57 up vs H0	4.89378e-10	1.46814e-08	12421.1	12421.1	H81 up vs H0	2.32306e-08	5.34304e-06	3241.59	3241.59	H312 up vs H0	25.6577	701.787	142.23	1
Ile-Tyr	294.158	7.37108	C15H22N2O4	Peptide(di-)	Hydrophobic peptide	Leu-Tyr	4.33087e-06	1.54036e-05	0.0146635	0.0443765	21.8804	21.8804	H36 up vs H0	0.0106455	0.0260475	29.7318	29.7318	H42 up vs H0	0.1972	0.236229	5.11027	5.11027	H57 up vs H0	0.001146	0.00198679	0.0134131	-74.5539	H81 down vs H0	0.718205	0.937751	1.56776	1.56776	H312 up vs H0	12.0063	474.551	205.531	1
Albine	232.158	7.37189	C14H20N2O	0	0	Albine	1.10886e-09	2.25034e-08	1.91982e-07	1.38517e-05	119.899	119.899	H36 up vs H0	5.5986e-08	3.51185e-06	212.698	212.698	H42 up vs H0	5.31528e-08	8.33533e-07	215.999	215.999	H57 up vs H0	1.69421e-07	1.21485e-06	124.12	124.12	H81 up vs H0	1	1	1	1	No change between H312 and H0	27.9576	370.008	68.82	1
[FA methyl,hydroxy(5:0)] 3R-methyl-3,5-dihydroxy-pentanoic acid	148.074	7.37237	C6H12O4	Lipids: Fatty Acyls	Fatty Acids and Conjugates	[FA methyl,hydroxy(5:0)] 3R-methyl-3,5-	1.59882e-05	4.52126e-05	0.000104169	0.00108825	4.5095	4.5095	H36 up vs H0	1.22522e-06	2.34834e-05	8.65674	8.65674	H42 up vs H0	0.000507297	0.00108035	3.91849	3.91849	H57 up vs H0	0.000659218	0.00121296	3.57641	3.57641	H81 up vs H0	0.200937	0.438755	1.57073	1.57073	H312 up vs H0	10.2822	31.6791	16.021	1
Carbetamide	236.116	7.37293	C12H16N2O3	0	0	Phe-Ala	6.24925e-05	0.00014231	0.00012163	0.00116562	827.41	827.41	H36 up vs H0	1.47005e-05	0.000137813	3877.17	3877.17	H42 up vs H0	1.96131e-05	6.12356e-05	3269.37	3269.37	H57 up vs H0	0.0349937	0.0468848	27.438	27.438	H81 up vs H0	0.00766784	0.0400819	89.5005	89.5005	H312 up vs H0	8.6533	544.327	327.1	1
Girgensonine	216.126	7.37424	C13H16N2O	0	0	Agroclavine	2.22751e-08	2.32876e-07	7.39808e-08	8.6142e-06	297.623	297.623	H36 up vs H0	5.91396e-09	8.16126e-07	909.378	909.378	H42 up vs H0	5.22785e-09	1.80361e-07	949.838	949.838	H57 up vs H0	1.49585e-08	1.71189e-07	499.296	499.296	H81 up vs H0	8.42336e-07	4.85863e-05	174.327	174.327	H312 up vs H0	20.9836	352.883	87.4487	1
Leu-Pro	228.148	7.37448	C11H20N2O3	Peptide(di-)	Hydrophobic peptide	Leu-Pro	9.86347e-11	3.24086e-09	0.128401	0.237525	1.80857	1.80857	H36 up vs H0	0.00010224	0.000641321	6.07588	6.07588	H42 up vs H0	1.12321e-09	5.53583e-08	37.8127	37.8127	H57 up vs H0	9.233e-11	4.94916e-09	50.6776	50.6776	H81 up vs H0	1.21213e-05	0.000380168	8.35698	8.35698	H312 up vs H0	34.8747	140.908	21.0101	1
1-Pyrroline	69.0579	7.37523	C4H7N	Amino Acid Metabolism	Arginine and proline metabolism	1-Pyrroline	0.000337075	0.000653319	0.00547123	0.0207426	2.99233	2.99233	H36 up vs H0	0.00092125	0.00332808	4.10601	4.10601	H42 up vs H0	0.00322554	0.00575096	3.40701	3.40701	H57 up vs H0	4.4617e-06	1.53163e-05	8.06305	8.06305	H81 up vs H0	0.00542616	0.0314348	3.14581	3.14581	H312 up vs H0	6.85284	25.4503	19.3119	1
Hippurate	179.058	7.37661	C9H9NO3	Amino Acid Metabolism	Phenylalanine metabolism	Hippurate	0.00851429	0.0121381	0.357602	0.49747	0.387171	-2.58284	H36 down vs H0	0.00824608	0.0208417	0.0484892	-20.6231	H42 down vs H0	0.00565805	0.00947586	0.041098	-24.3321	H57 down vs H0	0.556816	0.607916	0.547116	-1.82776	H81 down vs H0	0.890427	1	1.15861	1.15861	H312 up vs H0	3.94753	115.008	151.498	1
Leu-Thr	232.142	7.37692	C10H20N2O4	Peptide(di-)	Hydrophobic peptide	Leu-Val-Gly	3.71823e-06	1.37934e-05	4.87835e-05	0.000649302	286.668	286.668	H36 up vs H0	2.0762e-05	0.000176862	546.71	546.71	H42 up vs H0	5.94958e-07	4.4142e-06	2907.66	2907.66	H57 up vs H0	3.23282e-07	1.91644e-06	2748.24	2748.24	H81 up vs H0	5.94654e-06	0.000215953	976.802	976.802	H312 up vs H0	12.2189	470.326	200.157	1
[FA hydroxy(2:0/2:0)] 9S,15S-dihydroxy-11R,18-diacetoxy-5Z,13E-prostadienoic acid	454.257	7.37848	C24H38O8	Lipids: Fatty Acyls	Eicosanoids	Agroclavine	5.03614e-07	2.86472e-06	1.78998e-05	0.000343079	77.5691	77.5691	H36 up vs H0	3.59805e-05	0.000264112	74.7985	74.7985	H42 up vs H0	2.80689e-06	1.33569e-05	174.275	174.275	H57 up vs H0	1.83022e-05	4.89479e-05	77.0264	77.0264	H81 up vs H0	1	1	1	1	No change between H312 and H0	15.2443	298.439	101.801	1
Porphobilinogen	226.095	7.38299	C10H14N2O4	Metabolism of Cofactors and Vitamins	Porphyrin and chlorophyll metabolism	Agroclavine	1.31297e-06	6.01596e-06	2.82989e-06	9.21508e-05	263.055	263.055	H36 up vs H0	2.89114e-07	9.06767e-06	812.157	812.157	H42 up vs H0	3.46716e-07	3.0726e-06	756.26	756.26	H57 up vs H0	7.37783e-07	3.63621e-06	430.448	430.448	H81 up vs H0	0.00022218	0.00312866	66.243	66.243	H312 up vs H0	13.737	342.425	129.621	1
1-Pyrroline-4-hydroxy-2-carboxylate	129.043	7.38322	C5H7NO3	Amino Acid Metabolism	Arginine and proline metabolism	L-1-Pyrroline-3-hydroxy-5-carboxylate	0.206875	0.227229	0.0769781	0.168619	2.66722	2.66722	H36 up vs H0	0.0362205	0.0712026	3.41746	3.41746	H42 up vs H0	0.430616	0.473883	1.56122	1.56122	H57 up vs H0	0.043406	0.0571421	3.0992	3.0992	H81 up vs H0	0.418759	0.715207	1.57959	1.57959	H312 up vs H0	1.55806	12.5498	41.8848	1
Piperidine	85.0891	7.38353	C5H11N	0	piperine biosynthesis	1-Pyrroline	1.56089e-06	6.94848e-06	4.68977e-05	0.000647189	2.96843	2.96843	H36 up vs H0	6.37956e-05	0.000431558	3.03207	3.03207	H42 up vs H0	2.70575e-07	2.56804e-06	4.96384	4.96384	H57 up vs H0	1.11433e-07	8.94053e-07	5.02445	5.02445	H81 up vs H0	0.00111296	0.00948075	2.35036	2.35036	H312 up vs H0	13.4764	19.0628	7.35553	1
Nicotinamide	122.048	7.38361	C6H6N2O	Metabolism of Cofactors and Vitamins	Nicotinate and nicotinamide metabolism	Nicotinamide	0.106091	0.122618	0.0364328	0.0917469	0.363082	-2.7542	H36 down vs H0	0.068268	0.123311	0.401506	-2.49062	H42 down vs H0	0.592353	0.631721	0.771007	-1.29701	H57 down vs H0	0.62953	0.676598	0.799153	-1.25133	H81 down vs H0	0.848079	0.99689	1.09726	1.09726	H312 up vs H0	2.03953	12.2107	31.1326	1
Indoxylsulfate	213.01	7.3842	C8H7NO4S	0	0	Indoxylsulfate	0.0688754	0.081938	0.388459	0.524665	0.779073	-1.28358	H36 down vs H0	0.371224	0.476105	0.762994	-1.31063	H42 down vs H0	0.0139518	0.0212981	0.456703	-2.18961	H57 down vs H0	0.0116725	0.0169203	0.462006	-2.16447	H81 down vs H0	0.104667	0.288762	0.606624	-1.64847	H312 down vs H0	2.35236	5.4089	11.9566	1
Indolelactate	205.074	7.38428	C11H11NO3	Amino Acid Metabolism	Tryptophan metabolism	Indolelactate	0.0904024	0.10519	0.719568	0.826126	1.11645	1.11645	H36 up vs H0	0.13314	0.211642	1.63464	1.63464	H42 up vs H0	0.00784907	0.0127718	2.49193	2.49193	H57 up vs H0	0.132016	0.163245	1.60309	1.60309	H81 up vs H0	0.165847	0.3919	1.57131	1.57131	H312 up vs H0	2.15507	5.63326	13.5926	1
3-hydroxypyridine	95.0371	7.38569	C5H5NO	0	0	2-Hydroxypyridine	0.0331307	0.0422554	0.0584718	0.134038	0.151355	-6.60697	H36 down vs H0	0.0804589	0.141986	0.163267	-6.12493	H42 down vs H0	0.00338951	0.00598149	0.0402377	-24.8523	H57 down vs H0	0.0865578	0.109587	0.182817	-5.46994	H81 down vs H0	0.836259	0.99689	0.812198	-1.23123	H312 down vs H0	2.89237	74.709	134.314	1
Leu-Gln-Tyr	422.217	7.38698	C20H30N4O6	Peptide(tri-)	Hydrophobic peptide		0.00240144	0.00386245	0.0437208	0.106598	23.3967	23.3967	H36 up vs H0	0.00178799	0.00572802	222.348	222.348	H42 up vs H0	9.65812e-05	0.00024866	1268.19	1268.19	H57 up vs H0	0.00193344	0.00318394	168.724	168.724	H81 up vs H0	0.00711865	0.0377836	93.4639	93.4639	H312 up vs H0	5.01126	314.562	326.409	1
Ala-Val-Asp-Pro	400.196	7.38788	C17H28N4O7	Peptide(tetra-)	Hydrophobic peptide	Ala-Val-Asp-Pro	1.31882e-07	9.47903e-07	0.082263	0.17519	7.70037	7.70037	H36 up vs H0	0.000220298	0.00110953	157.109	157.109	H42 up vs H0	4.65725e-06	1.95945e-05	885.989	885.989	H57 up vs H0	3.24962e-07	1.91644e-06	2157.52	2157.52	H81 up vs H0	1	1	1	1	No change between H312 and H0	17.5444	635.057	188.225	1
5,6-Dihydrothymine	128.059	7.38916	C5H8N2O2	Nucleotide Metabolism	Pyrimidine metabolism	Agroclavine	1.34409e-07	9.56103e-07	7.78718e-06	0.000191898	64.608	64.608	H36 up vs H0	7.48498e-07	1.61395e-05	158.565	158.565	H42 up vs H0	1.99246e-07	2.08303e-06	239.975	239.975	H57 up vs H0	2.37371e-07	1.50262e-06	180.218	180.218	H81 up vs H0	0.0834936	0.240952	4.09705	4.09705	H312 up vs H0	17.5102	279.68	83.0565	1
Asn-Leu-Leu-Ser	445.254	7.39246	C19H35N5O7	Peptide(tetra-)	Hydrophobic peptide	Asn-Leu-Leu-Ser	1.17709e-05	3.56223e-05	0.0293541	0.0767211	18.299	18.299	H36 up vs H0	0.0100718	0.0248197	38.661	38.661	H42 up vs H0	2.2642e-05	6.91281e-05	880.851	880.851	H57 up vs H0	2.34604e-05	6.10855e-05	648.856	648.856	H81 up vs H0	1	1	1	1	No change between H312 and H0	10.6714	481.367	234.561	1
Thymine	126.043	7.39422	C5H6N2O2	Nucleotide Metabolism	Pyrimidine metabolism	Thymine	5.87769e-08	5.26702e-07	1.99517e-07	1.38517e-05	0.148267	-6.74457	H36 down vs H0	1.10581e-07	5.45009e-06	0.127191	-7.86221	H42 down vs H0	3.03587e-08	5.81875e-07	0.109147	-9.16195	H57 down vs H0	6.37678e-05	0.000147562	0.272992	-3.66312	H81 down vs H0	0.0206371	0.0862227	0.495325	-2.01888	H312 down vs H0	19.0496	40.2679	10.992	1
Val-Asp-Pro	329.159	7.39658	C14H23N3O6	Peptide(tri-)	Hydrophobic peptide	Leu-Val-Gly	7.61184e-07	3.91953e-06	0.00141749	0.00698622	114.684	114.684	H36 up vs H0	0.000181064	0.00100754	424.446	424.446	H42 up vs H0	5.05457e-06	2.08841e-05	2801.85	2801.85	H57 up vs H0	1.97364e-06	7.8727e-06	3238.97	3238.97	H81 up vs H0	1	1	1	1	No change between H312 and H0	14.5811	730.025	260.346	1
Dethiobiotin	214.132	7.39823	C10H18N2O3	Metabolism of Cofactors and Vitamins	Biotin metabolism	Leu-Pro	1.03168e-08	1.30136e-07	0.00394542	0.0155562	4.27796	4.27796	H36 up vs H0	1.61376e-05	0.000146512	12.5942	12.5942	H42 up vs H0	6.74568e-09	2.11569e-07	56.7732	56.7732	H57 up vs H0	3.10369e-09	5.63564e-08	55.9536	55.9536	H81 up vs H0	0.00083525	0.00758319	6.12497	6.12497	H312 up vs H0	22.6232	135.563	31.1596	1
alpha-aminopimelate	175.084	7.39899	C7H13NO4	0	0	alpha-aminopimelate	0.719744	0.727121	0.939219	0.984896	1.02581	1.02581	H36 up vs H0	0.557451	0.642139	1.2281	1.2281	H42 up vs H0	0.684794	0.715921	0.867683	-1.15249	H57 down vs H0	0.29314	0.34109	1.42643	1.42643	H81 up vs H0	0.987432	1	1.00551	1.00551	H312 up vs H0	0.573383	1.78318	16.1716	1
3-Amino-2-piperidone	114.079	7.39944	C5H10N2O	0	0	Agroclavine	1.31822e-08	1.51595e-07	1.2965e-07	1.27797e-05	124.636	124.636	H36 up vs H0	8.52119e-09	8.75818e-07	345.503	345.503	H42 up vs H0	2.44581e-09	1.05475e-07	508.913	508.913	H57 up vs H0	3.7464e-09	6.30492e-08	343.411	343.411	H81 up vs H0	9.89034e-07	5.24949e-05	87.2056	87.2056	H312 up vs H0	22.0906	284.035	66.8603	1
Ala-Tyr	252.111	7.40651	C12H16N2O4	Peptide(di-)	Hydrophobic peptide	Phe-Ala	3.04132e-07	1.87367e-06	3.3606e-06	0.000100818	322.855	322.855	H36 up vs H0	2.32387e-07	8.14961e-06	1229.94	1229.94	H42 up vs H0	7.81778e-08	1.0577e-06	1940.43	1940.43	H57 up vs H0	1.34651e-07	1.00988e-06	1129.22	1129.22	H81 up vs H0	0.000776722	0.0072424	49.6275	49.6275	H312 up vs H0	16.0827	440.709	142.494	1
Isoquinoline	129.058	7.40693	C9H7N	0	0	Isoquinoline	0.000789621	0.00140422	0.0250236	0.0664088	0.378282	-2.64353	H36 down vs H0	0.0019657	0.00613725	0.230076	-4.34639	H42 down vs H0	5.09729e-05	0.00014182	0.126545	-7.90233	H57 down vs H0	0.0025986	0.00417956	0.256276	-3.90205	H81 down vs H0	0.258113	0.525362	0.61043	-1.63819	H312 down vs H0	6.0233	28.5602	24.6564	1
Nicotinate	123.032	7.4077	C6H5NO2	Metabolism of Cofactors and Vitamins	Nicotinate and nicotinamide metabolism_	Nicotinate	0.0649982	0.0777274	0.13888	0.252572	2.62053	2.62053	H36 up vs H0	0.0812353	0.142991	3.30513	3.30513	H42 up vs H0	0.34505	0.387129	1.88476	1.88476	H57 up vs H0	0.740418	0.780079	0.809543	-1.23527	H81 down vs H0	0.391782	0.68265	0.5633	-1.77525	H312 down vs H0	2.39458	27.0579	58.7581	1
Ile-Pro-Pro	325.2	7.41295	C16H27N3O4	Peptide(tri-)	Hydrophobic peptide	Leu-Pro	2.62391e-12	2.01166e-10	1	1	1	1	No change between H36 and H0	1	1	1	1	No change between H42 and H0	1.09644e-06	6.81573e-06	62.5298	62.5298	H57 up vs H0	1.99658e-11	1.3839e-09	1103.76	1103.76	H81 up vs H0	1	1	1	1	No change between H312 and H0	47.9732	535.208	58.0133	1
Met-Pro	246.104	7.42339	C10H18N2O3S	Peptide(di-)	Hydrophobic peptide	Met-Pro	1.33448e-05	3.91827e-05	0.000833828	0.00467757	19.8639	19.8639	H36 up vs H0	6.94388e-06	7.48637e-05	102.389	102.389	H42 up vs H0	2.58493e-06	1.24727e-05	140.251	140.251	H57 up vs H0	2.08185e-06	8.25562e-06	121.445	121.445	H81 up vs H0	0.000207261	0.00305285	35.2561	35.2561	H312 up vs H0	10.5108	186.806	92.4181	1
Thymidine	242.09	7.43035	C10H14N2O5	Nucleotide Metabolism	Pyrimidine metabolism	Thymine	0.000260232	0.000510113	0.0024021	0.0106932	0.025145	-39.7693	H36 down vs H0	0.000944028	0.0033926	0.014033	-71.2604	H42 down vs H0	0.000103007	0.000263241	0.00532608	-187.755	H57 down vs H0	0.181046	0.218014	0.221901	-4.50651	H81 down vs H0	0.600308	0.855812	0.54505	-1.8347	H312 down vs H0	7.11514	242.311	177.09	1
beta-Aminopropion aldehyde	73.0527	7.47024	C3H7NO	Amino Acid Metabolism	beta-Alanine metabolism	Agroclavine	6.97354e-08	6.09082e-07	0.00012808	0.001177	2.35299	2.35299	H36 up vs H0	2.97412e-06	4.5567e-05	3.25077	3.25077	H42 up vs H0	1.92081e-07	2.07062e-06	4.03195	4.03195	H57 up vs H0	2.1328e-07	1.36262e-06	3.76908	3.76908	H81 up vs H0	0.381835	0.671585	1.19357	1.19357	H312 up vs H0	18.7234	19.2731	5.35267	1
Phenylacetonitrile	117.058	7.48215	C8H7N	Xenobiotics Biodegradation and Metaboli	Styrene degradation	Indole	0.0329234	0.0421468	0.606266	0.726256	1.06028	1.06028	H36 up vs H0	0.731304	0.79215	1.04151	1.04151	H42 up vs H0	0.00429743	0.00735929	1.44281	1.44281	H57 up vs H0	0.467438	0.520213	1.08625	1.08625	H81 up vs H0	0.893998	1	0.984357	-1.01589	H312 down vs H0	2.89707	1.03487	1.85751	1
3-Indoleacetonitrile	78.0343	7.48668	C10H8N2	Amino Acid Metabolism	Tryptophan metabolism	3-Indoleacetonitrile	0.000601268	0.00110524	0.0056989	0.0213709	0.302752	-3.30303	H36 down vs H0	0.000673437	0.00258151	0.202197	-4.94567	H42 down vs H0	0.000441759	0.000964601	0.189071	-5.28902	H57 down vs H0	9.23993e-05	0.000205002	0.160295	-6.23851	H81 down vs H0	0.187805	0.425388	0.57108	-1.75107	H312 down vs H0	6.28343	28.0409	23.2059	1
3-(4-Hydroxyphenyl)pyruvate	180.042	7.49457	C9H8O4	Amino Acid Metabolism	Tyrosine metabolism__Phenylalanine, tyr	3-(4-Hydroxyphenyl)pyruvate	0.352619	0.375474	0.359258	0.497982	0.339593	-2.9447	H36 down vs H0	0.710449	0.779347	0.635295	-1.57407	H42 down vs H0	0.427567	0.472034	0.377512	-2.64892	H57 down vs H0	0.751489	0.789235	0.690484	-1.44826	H81 down vs H0	0.0414536	0.139527	0.0748119	-13.3669	H312 down vs H0	1.16526	44.2886	197.639	1
3-Hydroxypropenoate	88.0161	7.50552	C3H4O3	0	0	3-Oxopropanoate	0.00156912	0.00264071	0.00128465	0.00650588	4.26367	4.26367	H36 up vs H0	0.000235027	0.00117514	5.98305	5.98305	H42 up vs H0	0.00269085	0.00489892	4.02334	4.02334	H57 up vs H0	8.50991e-05	0.000192516	6.47308	6.47308	H81 up vs H0	0.00140122	0.0111982	4.48326	4.48326	H312 up vs H0	5.38935	24.6959	23.8282	1
N-Ethylmaleimide	125.048	7.50969	C6H7NO2	0	0	N-Ethylmaleimide	3.32236e-06	1.27226e-05	0.0344236	0.0876468	0.37394	-2.67423	H36 down vs H0	0.00180513	0.00572802	0.201986	-4.95083	H42 down vs H0	5.27696e-07	4.13761e-06	0.0478564	-20.8958	H57 down vs H0	1.8207e-06	7.43361e-06	0.0675049	-14.8137	H81 down vs H0	0.000268614	0.00347588	0.14393	-6.94782	H312 down vs H0	12.3774	68.2114	28.657	1
Met-Ala	220.088	7.58182	C8H16N2O3S	Peptide(di-)	Hydrophobic peptide	Met-Ala	0.000155154	0.00031862	0.00915067	0.0317285	4.18464	4.18464	H36 up vs H0	0.00108214	0.00374701	7.03903	7.03903	H42 up vs H0	0.0632412	0.084731	2.80149	2.80149	H57 up vs H0	0.578043	0.626138	0.751019	-1.33152	H81 down vs H0	0.000450582	0.00472765	8.42354	8.42354	H312 up vs H0	7.65436	56.1258	38.1292	1
Methylimidazoleacetic acid	140.059	7.6857	C6H8N2O2	Amino Acid Metabolism	Histidine metabolism	Methylimidazoleacetic acid	0.0117999	0.0165486	0.113248	0.217824	0.423515	-2.36119	H36 down vs H0	0.0304192	0.0619152	0.285517	-3.50242	H42 down vs H0	0.0151965	0.0228892	0.240977	-4.14978	H57 down vs H0	0.000615486	0.00115091	0.129854	-7.70097	H81 down vs H0	0.330114	0.615812	0.580787	-1.7218	H312 down vs H0	3.68669	28.751	40.5526	1
N-Acetyl-L-glutamate 5-semialdehyde	173.069	7.71013	C7H11NO4	Amino Acid Metabolism	Arginine and proline metabolism	N-Acetyl-L-glutamate 5-semialdehyde	0.0178182	0.0242496	0.255994	0.391653	1.32003	1.32003	H36 up vs H0	0.195218	0.285383	1.3937	1.3937	H42 up vs H0	0.0384378	0.0526232	0.580133	-1.72374	H57 down vs H0	0.675747	0.720657	0.903818	-1.10642	H81 down vs H0	0.624669	0.873098	0.883713	-1.13159	H312 down vs H0	3.36429	5.45658	8.43394	1
4-Hydroxybutanoic acid	104.047	7.74889	C4H8O3	Carbohydrate Metabolism	Butanoate metabolism	4-Hydroxybutanoic acid	4.20276e-09	6.44424e-08	5.53653e-05	0.000670211	7.0958	7.0958	H36 up vs H0	3.57902e-07	1.07371e-05	17.733	17.733	H42 up vs H0	9.53694e-09	2.86108e-07	33.6606	33.6606	H57 up vs H0	1.39127e-10	5.64693e-09	63.8143	63.8143	H81 up vs H0	2.23287e-05	0.000547997	8.96268	8.96268	H312 up vs H0	24.6621	116.124	24.4848	1
Nicotine	81.0578	7.80384	C10H14N2	Biosynthesis of Secondary Metabolites	Alkaloid biosynthesis II	Nicotine	0.0599037	0.072515	0.0114183	0.0375174	0.501017	-1.99594	H36 down vs H0	0.0309013	0.0627115	0.545994	-1.83152	H42 down vs H0	0.00429825	0.00735929	0.436243	-2.2923	H57 down vs H0	0.011973	0.0173055	0.503602	-1.98569	H81 down vs H0	0.0227862	0.0916775	0.526338	-1.89992	H312 down vs H0	2.4542	4.48927	9.51196	1
4-Hydroxy-3-nitrosobenzamide	166.038	7.99821	C7H6N2O3	0	0		2.86928e-06	1.13782e-05	0.0529452	0.12342	0.116226	-8.60389	H36 down vs H0	0.000744413	0.00282222	0.0144688	-69.1141	H42 down vs H0	4.62401e-06	1.9574e-05	0.00169272	-590.764	H57 down vs H0	1.66783e-06	6.97457e-06	0.0014606	-684.651	H81 down vs H0	0.215862	0.465005	0.245074	-4.0804	H312 down vs H0	12.5858	402.398	166.256	1
3-Oxohexobarbital	250.095	8.03865	C12H14N2O4	0	0		4.58801e-06	1.59967e-05	0.253551	0.389644	0.31561	-3.16847	H36 down vs H0	0.000170703	0.000958445	0.0108593	-92.087	H42 down vs H0	1.05878e-05	3.68969e-05	0.00365756	-273.406	H57 down vs H0	5.62865e-06	1.85826e-05	0.00365756	-273.406	H81 down vs H0	0.0924768	0.260445	0.164969	-6.06175	H312 down vs H0	11.9266	330.214	143.974	1
N2-(D-1-Carboxyethyl)-L-lysine	218.127	8.08606	C9H18N2O4	Amino Acid Metabolism	Lysine degradation	4-Hydroxybutanoic acid	3.33607e-07	1.98439e-06	1.61002e-05	0.000317404	20.4816	20.4816	H36 up vs H0	1.05299e-06	2.13695e-05	43.915	43.915	H42 up vs H0	2.33643e-07	2.33643e-06	62.8056	62.8056	H57 up vs H0	5.79628e-08	5.06257e-07	72.9618	72.9618	H81 up vs H0	0.00506931	0.0298959	6.22607	6.22607	H312 up vs H0	15.9265	147.87	48.2795	1
2,4-Dinitrophenylhydrazine	198.039	8.11669	C6H6N4O4	0	0	2,4-Dinitrophenylhydrazine	0.00357535	0.00547005	0.520188	0.643243	0.442313	-2.26084	H36 down vs H0	0.294932	0.39592	0.247329	-4.04319	H42 down vs H0	0.00413931	0.00715821	0.0164261	-60.8788	H57 down vs H0	0.00286171	0.00457079	0.0162447	-61.5586	H81 down vs H0	0.944079	1	1.09699	1.09699	H312 up vs H0	4.66731	207.421	231.095	1
Monomethyl sulfate	111.983	8.15356	CH4O4S	0	0	Monomethyl sulfate	0.428143	0.448283	0.338989	0.483269	0.608349	-1.64379	H36 down vs H0	0.166785	0.25182	0.468583	-2.13409	H42 down vs H0	0.0841023	0.108875	0.383969	-2.60437	H57 down vs H0	0.750774	0.789235	0.848925	-1.17796	H81 down vs H0	0.735297	0.943039	0.833505	-1.19975	H312 down vs H0	1.01652	7.51091	38.422	1
2,4-Dinitroaniline	183.028	8.24166	C6H5N3O4	0	0	2,4-Dinitroaniline	0.019873	0.0267423	0.373712	0.509607	0.344048	-2.90657	H36 down vs H0	0.233289	0.329181	0.222567	-4.49302	H42 down vs H0	0.00328515	0.00582714	0.0185792	-53.8237	H57 down vs H0	0.00703328	0.0105729	0.0317592	-31.487	H81 down vs H0	0.369487	0.660543	0.324827	-3.07856	H312 down vs H0	3.28014	129.37	205.09	1
Ricinine	164.059	8.26539	C8H8N2O2	0	0	Ricinine	0.00268393	0.00423778	0.0859367	0.181334	0.253001	-3.95255	H36 down vs H0	0.00570087	0.0154259	0.0886441	-11.2811	H42 down vs H0	0.000235182	0.000542727	0.0324588	-30.8083	H57 down vs H0	0.040339	0.0535268	0.189835	-5.26773	H81 down vs H0	0.577761	0.850011	0.635491	-1.57359	H312 down vs H0	4.91423	82.6865	87.4949	1
Justicidin B	364.094	8.34652	C21H16O6	0	0		0.00164148	0.00272567	0.0101221	0.0340695	32.7572	32.7572	H36 up vs H0	0.148315	0.227923	7.08128	7.08128	H42 up vs H0	0.0216632	0.0312058	24.7801	24.7801	H57 up vs H0	0.000261274	0.000522548	202.683	202.683	H81 up vs H0	0.000215432	0.00309684	282.679	282.679	H312 up vs H0	5.34877	240.245	233.563	1
Asn-Trp-Asp-Pro	530.213	8.34809	C24H30N6O8	Peptide(tetra-)	Hydrophobic peptide	Asn-Trp-Asp-Pro	1.00212e-07	7.68294e-07	0.0649873	0.145588	11.8046	11.8046	H36 up vs H0	0.000812699	0.00301485	158.724	158.724	H42 up vs H0	5.5499e-07	4.25492e-06	6700.34	6700.34	H57 up vs H0	3.02563e-08	3.11594e-07	21099.6	21099.6	H81 up vs H0	0.0348052	0.122159	19.6886	19.6886	H312 up vs H0	18.0455	840.544	242.211	1
[FA amino(11:0)] 11-amino-undecanoic acid	201.173	8.35674	C11H23NO2	Lipids: Fatty Acyls	Amino Fatty Acids	[FA amino(11:0)] 11-amino-undecanoic ac	0.507033	0.522168	0.972114	1	0.971599	-1.02923	H36 down vs H0	0.6	0.681248	0.635947	-1.57246	H42 down vs H0	0.103531	0.129885	0.237283	-4.21438	H57 down vs H0	0.291791	0.340094	0.415454	-2.40701	H81 down vs H0	0.71205	0.93748	0.727484	-1.3746	H312 down vs H0	0.881964	16.6804	98.3464	1
N-(octanoyl)-L-homoserine	245.163	8.36538	C12H23NO4	0	0	[FA amino(11:0)] 11-amino-undecanoic ac	0.463036	0.481167	0.920287	0.970945	0.924586	-1.08157	H36 down vs H0	0.645411	0.71944	0.685703	-1.45836	H42 down vs H0	0.0924434	0.117686	0.242717	-4.12003	H57 down vs H0	0.245015	0.289983	0.397345	-2.51671	H81 down vs H0	0.709208	0.93748	0.736704	-1.3574	H312 down vs H0	0.954896	16.3183	88.8631	1
Hypoxanthine	136.038	8.42792	C5H4N4O	Nucleotide Metabolism	Purine metabolism	Hypoxanthine	1.81633e-10	5.22195e-09	0.449031	0.576053	0.81859	-1.22161	H36 down vs H0	0.832792	0.873293	1.05972	1.05972	H42 up vs H0	0.000112678	0.00028272	3.43964	3.43964	H57 up vs H0	6.07649e-10	1.74699e-08	11.8758	11.8758	H81 up vs H0	0.29921	0.584858	1.33393	1.33393	H312 up vs H0	33.0064	63.5332	10.0093	1
Asp-Pro-Tyr	393.154	8.4505	C18H23N3O7	Peptide(tri-)	Hydrophobic peptide	Asp-Pro-Tyr	3.0476e-06	1.1948e-05	0.0259182	0.0682579	8.70953	8.70953	H36 up vs H0	0.00476629	0.0132078	19.1719	19.1719	H42 up vs H0	7.45665e-06	2.82697e-05	207.043	207.043	H57 up vs H0	8.39003e-06	2.55027e-05	158.308	158.308	H81 up vs H0	1	1	1	1	No change between H312 and H0	12.4998	297.783	123.879	1
Deoxyuridine	228.075	8.45538	C9H12N2O5	Nucleotide Metabolism	Pyrimidine metabolism		0.000457567	0.000862627	7.61144e-05	0.000890151	0.0028882	-346.237	H36 down vs H0	0.000213965	0.00109475	0.00371	-269.542	H42 down vs H0	0.00134411	0.00268045	0.00931535	-107.35	H57 down vs H0	0.0193157	0.0268706	0.0446389	-22.402	H81 down vs H0	0.183395	0.419177	0.168699	-5.92772	H312 down vs H0	6.54922	288.875	229.363	1
5-Acetylamino-6-amino-3-methyluracil	198.075	8.48552	C7H10N4O3	Biosynthesis of Secondary Metabolites	Caffeine metabolism	5-Acetylamino-6-amino-3-methyluracil	0.00556333	0.00820234	0.247617	0.383085	0.222904	-4.48625	H36 down vs H0	0.229104	0.323938	0.195421	-5.11717	H42 down vs H0	0.00112822	0.0022829	0.0078203	-127.872	H57 down vs H0	0.00135292	0.00231068	0.0105197	-95.0597	H81 down vs H0	0.105464	0.288762	0.108246	-9.23822	H312 down vs H0	4.29558	196.366	237.71	1
1-thio-&beta;-D-glucose	196.041	8.48603	C6H12O5S	0	0	1-thio-&beta;-D-glucose	0.107944	0.124152	0.337788	0.482555	1.12527	1.12527	H36 up vs H0	0.012607	0.0299959	1.40256	1.40256	H42 up vs H0	0.362134	0.403671	1.12423	1.12423	H57 up vs H0	0.924822	0.937044	1.01158	1.01158	H81 up vs H0	0.768455	0.956122	1.03827	1.03827	H312 up vs H0	2.02705	0.840387	2.15585	1
Borreline	266.142	8.63677	C17H18N2O	0	0	Borreline	7.68173e-05	0.000170431	0.00077805	0.00451138	54.414	54.414	H36 up vs H0	0.000513815	0.00212295	77.4605	77.4605	H42 up vs H0	0.000690823	0.00145326	68.3564	68.3564	H57 up vs H0	0.573726	0.623418	1.81964	1.81964	H81 up vs H0	1	1	1	1	No change between H312 and H0	8.42071	263.831	162.922	1
3-Methylbut-2-enal	84.0575	8.66945	C5H8O	Biosynthesis of Secondary Metabolites	Zeatin biosynthesis	Urocanate	1.16742e-05	3.55525e-05	0.00055052	0.00336158	0.303836	-3.29125	H36 down vs H0	0.000150915	0.000875056	0.246533	-4.05625	H42 down vs H0	1.01176e-05	3.56181e-05	0.178293	-5.60873	H57 down vs H0	5.59568e-06	1.85626e-05	0.179151	-5.58189	H81 down vs H0	0.230269	0.484408	0.678261	-1.47436	H312 down vs H0	10.682	27.7546	13.5109	1
sorbate	112.052	8.67734	C6H8O2	Lipids: Fatty Acyls	Fatty Acids and Conjugates	Urocanate	8.24016e-06	2.68669e-05	0.00178231	0.00848131	0.400236	-2.49852	H36 down vs H0	0.000292777	0.00136498	0.317161	-3.15297	H42 down vs H0	5.44402e-06	2.18394e-05	0.209171	-4.78079	H57 down vs H0	9.99331e-06	2.94675e-05	0.237687	-4.20721	H81 down vs H0	0.401137	0.690236	0.790922	-1.26435	H312 down vs H0	11.1361	21.8778	10.2159	1
Maleimide	97.0164	8.68613	C4H3NO2	0	0	Urocanate	8.25475e-06	2.68669e-05	0.000871895	0.00485167	0.327607	-3.05244	H36 down vs H0	0.000218295	0.00110753	0.264436	-3.78163	H42 down vs H0	1.03651e-05	3.63043e-05	0.184766	-5.41224	H57 down vs H0	1.94349e-06	7.8727e-06	0.163963	-6.09893	H81 down vs H0	0.188969	0.426107	0.658232	-1.51922	H312 down vs H0	11.1337	27.8381	13.0017	1
2-Phenylacetamide	135.068	8.69628	C8H9NO	Amino Acid Metabolism	Phenylalanine metabolism__Styrene degra	2-Phenylacetamide	1.06321e-06	5.13018e-06	2.24248e-05	0.000418191	5.64999	5.64999	H36 up vs H0	4.9575e-07	1.31564e-05	10.2425	10.2425	H42 up vs H0	3.99773e-08	7.12011e-07	14.6839	14.6839	H57 up vs H0	3.69132e-06	1.2799e-05	7.12396	7.12396	H81 up vs H0	2.44719e-05	0.000550186	6.03161	6.03161	H312 up vs H0	14.0596	45.0553	16.6639	1
Urocanate	69.0215	8.69711	C6H6N2O2	Amino Acid Metabolism	Histidine metabolism	Urocanate	0.000719332	0.00128253	0.1459	0.260131	0.291639	-3.4289	H36 down vs H0	0.155491	0.237063	0.284808	-3.51113	H42 down vs H0	3.60257e-05	0.000105778	0.01398	-71.5306	H57 down vs H0	0.0465192	0.0606772	0.179391	-5.57442	H81 down vs H0	0.618014	0.870265	0.648354	-1.54237	H312 down vs H0	6.11173	117.208	99.7231	1
Brunfelsamidine	109.064	8.72265	C5H7N3	0	0	Brunfelsamidine	1.7071e-05	4.74958e-05	0.000193737	0.00148531	3.11977	3.11977	H36 up vs H0	5.23259e-06	6.4473e-05	4.78073	4.78073	H42 up vs H0	8.70541e-07	5.83178e-06	5.78744	5.78744	H57 up vs H0	3.56594e-05	8.88265e-05	3.69158	3.69158	H81 up vs H0	0.00132293	0.0108713	2.68031	2.68031	H312 up vs H0	10.2001	19.932	10.1613	1
Riboflavin	376.139	8.72534	C17H20N4O6	Metabolism of Cofactors and Vitamins	Riboflavin metabolism	Pantothenate	0.017902	0.0243157	0.561215	0.680559	0.585138	-1.709	H36 down vs H0	0.0425688	0.0829731	0.131594	-7.59915	H42 down vs H0	0.00249366	0.00457613	0.0414462	-24.1277	H57 down vs H0	0.213728	0.255574	0.313328	-3.19155	H81 down vs H0	0.841853	0.99689	0.825595	-1.21125	H312 down vs H0	3.36066	79.0725	122.35	1
L-Glutamate 5-semialdehyde	131.058	8.73736	C5H9NO3	Amino Acid Metabolism	Arginine and proline metabolism	L-Glutamate 5-semialdehyde	0.000628619	0.00113844	0.100431	0.199545	1.41303	1.41303	H36 up vs H0	0.402526	0.503785	1.19772	1.19772	H42 up vs H0	0.0898912	0.115074	1.45276	1.45276	H57 up vs H0	4.82013e-05	0.000115885	2.68354	2.68354	H81 up vs H0	0.639529	0.887877	1.10569	1.10569	H312 up vs H0	6.24062	7.2973	6.08048	1
2-amino-4-methylphenol	123.069	8.74454	C7H9NO	0	0	Urocanate	8.75465e-06	2.82276e-05	0.00231486	0.0105063	0.391213	-2.55615	H36 down vs H0	0.000197977	0.00105895	0.284726	-3.51215	H42 down vs H0	1.56463e-05	5.13436e-05	0.215333	-4.64397	H57 down vs H0	3.42821e-06	1.21931e-05	0.195572	-5.11322	H81 down vs H0	0.323535	0.609943	0.746695	-1.33923	H312 down vs H0	11.0563	24.2356	11.3985	1
Iminoglycine	73.0164	8.74787	C2H3NO2	Metabolism of Cofactors and Vitamins	Thiamine metabolism	Urocanate	1.99367e-05	5.45886e-05	0.000832386	0.00467757	0.40337	-2.47911	H36 down vs H0	0.00282499	0.00836584	0.437027	-2.28819	H42 down vs H0	1.01035e-05	3.56181e-05	0.254165	-3.93445	H57 down vs H0	3.68187e-06	1.2799e-05	0.245478	-4.07368	H81 down vs H0	0.131767	0.334261	0.676644	-1.47788	H312 down vs H0	10.0072	16.4046	8.52427	1
Pantothenate	219.111	8.77621	C9H17NO5	Amino Acid Metabolism	beta-Alanine metabolism__Pantothenate a	Pantothenate	0.0135339	0.0187893	0.916121	0.969515	0.972506	-1.02827	H36 down vs H0	0.528329	0.612229	0.839462	-1.19124	H42 down vs H0	0.065528	0.0872863	0.590695	-1.69292	H57 down vs H0	0.0205572	0.0285402	0.523845	-1.90896	H81 down vs H0	0.284244	0.563588	1.34901	1.34901	H312 up vs H0	3.57859	6.97973	10.1422	1
N-hydroxyisoleucine	147.09	8.78236	C6H13NO3	0	lotaustralin biosynthesis __ superpathw	Pantothenate	0.0293789	0.0381042	0.926619	0.975131	1.0277	1.0277	H36 up vs H0	0.789052	0.836323	0.920402	-1.08648	H42 down vs H0	0.147861	0.180846	0.632759	-1.58038	H57 down vs H0	0.0403289	0.0535268	0.530448	-1.8852	H81 down vs H0	0.248973	0.515891	1.43599	1.43599	H312 up vs H0	2.98267	7.30645	12.7381	1
Trp-Gln-Tyr	495.212	8.78618	C25H29N5O6	Peptide(tri-)	Hydrophobic peptide	Trp-Gln-Tyr	1.29783e-08	1.51595e-07	1.11716e-05	0.000247118	443.447	443.447	H36 up vs H0	1.46869e-06	2.59846e-05	1457.98	1457.98	H42 up vs H0	5.17455e-08	8.30334e-07	7092.64	7092.64	H57 up vs H0	1.43645e-06	6.08068e-06	1079.69	1079.69	H81 up vs H0	1	1	1	1	No change between H312 and H0	22.1242	794.377	186.708	1
L-Alanine	89.0477	8.79794	C3H7NO2	Amino Acid Metabolism	Alanine and aspartate metabolism__Cyste	Pantothenate	0.134335	0.152704	0.896168	0.954253	0.969636	-1.03132	H36 down vs H0	0.51139	0.596046	0.849834	-1.1767	H42 down vs H0	0.232359	0.274534	0.741679	-1.34829	H57 down vs H0	0.231798	0.27576	0.750909	-1.33172	H81 down vs H0	0.195237	0.430395	1.38389	1.38389	H312 up vs H0	1.86951	2.90485	8.07976	1
Ala-Ala-Pro-Tyr	420.2	8.80325	C20H28N4O6	Peptide(tetra-)	Hydrophobic peptide	Ala-Ala-Pro-Tyr	3.18798e-06	1.24277e-05	0.000994768	0.00540464	17.9602	17.9602	H36 up vs H0	0.000292639	0.00136498	29.942	29.942	H42 up vs H0	2.48886e-06	1.23548e-05	131.226	131.226	H57 up vs H0	1.99847e-07	1.32591e-06	231.886	231.886	H81 up vs H0	4.18349e-06	0.000167755	111.459	111.459	H312 up vs H0	12.4359	214.059	89.508	1
Dopaquinone	195.053	8.80507	C9H9NO4	Amino Acid Metabolism	Tyrosine metabolism	Dopaquinone	0.252012	0.27298	0.865233	0.935754	1.09906	1.09906	H36 up vs H0	0.20997	0.302462	0.477177	-2.09566	H42 down vs H0	0.155992	0.189164	0.431313	-2.3185	H57 down vs H0	0.734658	0.777476	0.827958	-1.20779	H81 down vs H0	0.525571	0.804089	1.44824	1.44824	H312 up vs H0	1.41441	12.1909	44.8192	1
Sinapyl alcohol	210.089	8.80934	C11H14O4	Biosynthesis of Secondary Metabolites	Phenylpropanoid biosynthesis	Sinapyl alcohol	0.121726	0.139058	0.364691	0.500273	0.506968	-1.97251	H36 down vs H0	0.308897	0.407532	0.450169	-2.22139	H42 down vs H0	0.0068568	0.0112916	0.104506	-9.56886	H57 down vs H0	0.239617	0.284082	0.412244	-2.42575	H81 down vs H0	0.522306	0.802652	0.60728	-1.64669	H312 down vs H0	1.94047	29.8572	80.0101	1
2,3-Diaminosalicylic acid	168.053	8.82503	C7H8N2O3	0	0	4-Hydroxyphenylacetylglycine	0.0578446	0.0707673	0.363169	0.500174	1.16972	1.16972	H36 up vs H0	0.422342	0.516426	0.865705	-1.15513	H42 down vs H0	0.10871	0.135642	0.745398	-1.34156	H57 down vs H0	0.918062	0.932934	1.01775	1.01775	H81 up vs H0	0.0789126	0.229493	0.723599	-1.38198	H312 down vs H0	2.47979	2.01885	4.23343	1
Asn-Leu-Pro-Ser	429.222	8.83132	C18H31N5O7	Peptide(tetra-)	Hydrophobic peptide	Asn-Leu-Pro-Ser	3.88778e-06	1.41935e-05	0.00129175	0.00650588	41.5267	41.5267	H36 up vs H0	0.000601478	0.00234475	67.4786	67.4786	H42 up vs H0	9.55343e-06	3.41548e-05	369.261	369.261	H57 up vs H0	1.48237e-05	4.12434e-05	241.474	241.474	H81 up vs H0	1	1	1	1	No change between H312 and H0	12.1565	368.269	157.529	1
N-Hydroxy-2-acetamidofluorene	239.095	8.84928	C15H13NO2	0	0	Ala-Asn-Ser-Tyr	0.000608215	0.00111318	0.0537028	0.124764	0.0963741	-10.3762	H36 down vs H0	0.0233868	0.049652	0.0543325	-18.4052	H42 down vs H0	0.00048572	0.00104407	0.00807579	-123.827	H57 down vs H0	0.000251386	0.000507183	0.00740868	-134.977	H81 down vs H0	0.723019	0.937751	0.648413	-1.54223	H312 down vs H0	6.27236	238.59	197.799	1
1-Methylhypoxanthine	150.054	8.86198	C6H6N4O	0	0	1-Methylhypoxanthine	0.000116159	0.000246613	0.00364454	0.014706	0.0368517	-27.1358	H36 down vs H0	0.000239523	0.00118771	0.0101385	-98.6336	H42 down vs H0	0.613681	0.651446	0.576191	-1.73554	H57 down vs H0	0.483127	0.536807	2.08541	2.08541	H81 up vs H0	0.530896	0.808649	0.503953	-1.98431	H312 down vs H0	7.96514	241.245	157.495	1
4-Hydroxyphenylacetylglycine	209.069	8.89964	C10H11NO4	Amino Acid Metabolism	Tyrosine metabolism	4-Hydroxyphenylacetylglycine	0.173816	0.193441	0.822126	0.903797	0.94996	-1.05268	H36 down vs H0	0.184315	0.274682	0.724693	-1.3799	H42 down vs H0	0.091056	0.116349	0.660774	-1.51338	H57 down vs H0	0.033686	0.0453086	0.602361	-1.66013	H81 down vs H0	0.111216	0.298268	0.677532	-1.47594	H312 down vs H0	1.68392	2.44229	7.54187	1
7-Aminomethyl-7-carbaguanine	179.081	8.90546	C7H9N5O	0	0	1-Methylhypoxanthine	0.027851	0.0363274	0.0910419	0.186961	0.24677	-4.05235	H36 down vs H0	0.0453267	0.0878523	0.173587	-5.76081	H42 down vs H0	0.849173	0.864202	1.17346	1.17346	H57 up vs H0	0.320983	0.370365	2.24049	2.24049	H81 up vs H0	0.594695	0.853084	0.638522	-1.56612	H312 down vs H0	3.02296	54.5453	93.827	1
Homocysteinesulfinicacid	167.025	8.94476	C4H9NO4S	0	0	Homocysteinesulfinicacid	1.62398e-06	7.13724e-06	0.00205628	0.00958671	2.24172	2.24172	H36 up vs H0	6.62232e-05	0.000443631	3.21537	3.21537	H42 up vs H0	3.35411e-06	1.50282e-05	4.25451	4.25451	H57 up vs H0	6.68421e-08	5.62452e-07	5.77998	5.77998	H81 up vs H0	0.00696126	0.0373587	2.05779	2.05779	H312 up vs H0	13.4172	21.1664	8.20327	1
3,5-dihydro-5-methylidene-4H-imidazol-4-one	196.096	8.95221	C8H12N4O2	0	0	1H-Imidazole-4-ethanamine	1.90152e-06	8.04938e-06	2.27507e-06	8.2621e-05	116.34	116.34	H36 up vs H0	9.03437e-07	1.889e-05	193.527	193.527	H42 up vs H0	3.47337e-07	3.0726e-06	264.532	264.532	H57 up vs H0	7.18908e-06	2.27544e-05	81.9976	81.9976	H81 up vs H0	0.00250713	0.0172992	15.7345	15.7345	H312 up vs H0	13.1832	232.766	91.8127	1
Ala-Pro-Ser-Tyr	436.196	8.97413	C20H28N4O7	Peptide(tetra-)	Hydrophobic peptide	Ala-Trp-Ser-Tyr	1.39855e-08	1.58196e-07	0.385732	0.522898	2.1247	2.1247	H36 up vs H0	0.00204491	0.00632729	21.2616	21.2616	H42 up vs H0	6.86614e-08	9.66864e-07	757.084	757.084	H57 up vs H0	9.54119e-07	4.44826e-06	230.803	230.803	H81 up vs H0	1	1	1	1	No change between H312 and H0	21.9635	454.879	107.695	1
Asn-Leu-Thr-Pro	443.238	8.97657	C19H33N5O7	Peptide(tetra-)	Hydrophobic peptide	Asn-Leu-Thr-Pro	1.8343e-05	5.08301e-05	0.0133606	0.0411554	16.4294	16.4294	H36 up vs H0	0.000520368	0.00213722	78.2082	78.2082	H42 up vs H0	4.30069e-05	0.000122623	222.044	222.044	H57 up vs H0	6.04555e-05	0.000141707	153.992	153.992	H81 up vs H0	1	1	1	1	No change between H312 and H0	10.1105	318.957	164.046	1
3-(4-Hydroxyphenyl)lactate	182.058	8.99505	C9H10O4	Amino Acid Metabolism	Tyrosine metabolism	3-(4-Hydroxyphenyl)lactate	8.35696e-05	0.00018364	0.0153091	0.0459274	2.53644	2.53644	H36 up vs H0	0.000202914	0.00106069	5.03891	5.03891	H42 up vs H0	8.08202e-05	0.000215312	5.74268	5.74268	H57 up vs H0	0.00621997	0.00949508	2.9079	2.9079	H81 up vs H0	0.963844	1	0.983007	-1.01729	H312 down vs H0	8.32677	30.38	18.9721	1
Leu-Asn	245.138	9.00006	C10H19N3O4	Peptide(di-)	Hydrophobic peptide	Leu-Asn	1.15299e-05	3.53585e-05	0.000442507	0.00285355	5.07985	5.07985	H36 up vs H0	6.3709e-07	1.56997e-05	15.7453	15.7453	H42 up vs H0	2.22334e-06	1.14485e-05	12.8032	12.8032	H57 up vs H0	0.000137011	0.000289993	6.08471	6.08471	H81 up vs H0	0.00103519	0.00892851	4.75465	4.75465	H312 up vs H0	10.698	49.6051	24.1116	1
1H-Imidazole-4-ethanamine	111.08	9.0181	C5H9N3	Amino Acid Metabolism	Histidine metabolism	1H-Imidazole-4-ethanamine	3.452e-06	1.30157e-05	1.88992e-06	7.67085e-05	74.8596	74.8596	H36 up vs H0	2.031e-06	3.41803e-05	88.8387	88.8387	H42 up vs H0	7.10266e-07	5.0524e-06	120.42	120.42	H57 up vs H0	1.37319e-05	3.86734e-05	43.6497	43.6497	H81 up vs H0	0.00305665	0.0195286	11.1603	11.1603	H312 up vs H0	12.3234	174.909	73.805	1
Skatole	131.074	9.02349	C9H9N	0	0	Skatole	0.000577959	0.00106629	0.0528701	0.12342	0.618669	-1.61637	H36 down vs H0	0.129752	0.207242	0.679185	-1.47235	H42 down vs H0	0.104538	0.130672	1.5157	1.5157	H57 up vs H0	0.559215	0.609571	1.15033	1.15033	H81 up vs H0	0.00645437	0.0359155	0.48079	-2.07991	H312 down vs H0	6.32158	10.0543	8.27041	1
[FA amino(10:0)] 10-amino-decanoic acid	187.157	9.04471	C10H21NO2	Lipids: Fatty Acyls	Amino Fatty Acids	[FA amino(10:0)] 10-amino-decanoic acid	0.750285	0.756866	0.651697	0.771305	1.44479	1.44479	H36 up vs H0	0.917661	0.944139	1.09183	1.09183	H42 up vs H0	0.328339	0.370186	0.432414	-2.3126	H57 down vs H0	0.880806	0.901407	1.12977	1.12977	H81 up vs H0	0.790411	0.966992	1.25356	1.25356	H312 up vs H0	0.531658	9.7967	95.8187	1
O-Butanoylcarnitine	231.147	9.05235	C11H21NO4	Lipids: Fatty Acyls	Fatty acyl carnitines	[FA amino(10:0)] 10-amino-decanoic acid	0.612799	0.624566	0.819631	0.903797	1.19352	1.19352	H36 up vs H0	0.783837	0.833717	0.80064	-1.249	H42 down vs H0	0.170792	0.206026	0.323043	-3.09556	H57 down vs H0	0.740509	0.780079	0.773301	-1.29316	H81 down vs H0	0.913187	1	1.09232	1.09232	H312 up vs H0	0.722212	12.0911	87.0569	1
Met-Ser	236.083	9.07876	C8H16N2O4S	Peptide(di-)	Hydrophobic peptide	Leu-Asn	5.22061e-07	2.92864e-06	0.000121415	0.00116562	30.7719	30.7719	H36 up vs H0	4.8197e-07	1.31564e-05	193.537	193.537	H42 up vs H0	7.76318e-08	1.0577e-06	347.844	347.844	H57 up vs H0	2.06137e-07	1.33191e-06	200.316	200.316	H81 up vs H0	2.94969e-06	0.000127205	110.191	110.191	H312 up vs H0	15.1857	248.423	85.0669	1
Tauropine	197.036	9.08712	C5H11NO5S	0	0	Tauropine	5.45319e-07	2.99541e-06	8.51163e-07	4.51771e-05	27.4971	27.4971	H36 up vs H0	2.07653e-08	1.592e-06	72.2236	72.2236	H42 up vs H0	1.71728e-05	5.53702e-05	17.037	17.037	H57 up vs H0	2.25418e-06	8.6893e-06	22.5854	22.5854	H81 up vs H0	0.00132346	0.0108713	6.96605	6.96605	H312 up vs H0	15.1149	114.491	39.3883	1
L-a-glutamyl-L-Lysine	275.148	9.0877	C11H21N3O5	Peptide(di-)	Basic peptide	L-a-glutamyl-L-Lysine	5.80298e-05	0.000134364	0.167484	0.28605	5.12441	5.12441	H36 up vs H0	0.0710205	0.126954	9.60601	9.60601	H42 up vs H0	7.85819e-05	0.000210161	276.629	276.629	H57 up vs H0	4.12847e-05	0.000100304	288.233	288.233	H81 up vs H0	0.51423	0.797127	2.21402	2.21402	H312 up vs H0	8.73767	328.375	195.424	1
Thr-Tyr	282.122	9.09013	C13H18N2O5	Peptide(di-)	Hydrophobic peptide	Thr-Tyr	6.81253e-06	2.27084e-05	0.000276026	0.00202615	70.8429	70.8429	H36 up vs H0	0.000241477	0.00118771	90.365	90.365	H42 up vs H0	1.71389e-06	9.02738e-06	667.841	667.841	H57 up vs H0	5.95674e-06	1.92063e-05	310.675	310.675	H81 up vs H0	0.148403	0.364405	4.84302	4.84302	H312 up vs H0	11.3891	332.401	151.767	1
Hexazinone	126.079	9.12866	C12H20N4O2	0	0	Hexazinone	4.46099e-06	1.57045e-05	2.93814e-06	9.21508e-05	8.64131	8.64131	H36 up vs H0	3.0378e-06	4.5567e-05	9.46449	9.46449	H42 up vs H0	1.46492e-06	8.05932e-06	10.5402	10.5402	H57 up vs H0	0.000176493	0.000365707	4.90073	4.90073	H81 up vs H0	0.0168334	0.0725942	2.63817	2.63817	H312 up vs H0	11.9653	44.8915	19.5093	1
Ribothymidine	258.085	9.18836	C10H14N2O6	0	0	(1-Ribosylimidazole)-4-acetate	0.244828	0.265616	0.156058	0.272607	0.20514	-4.87472	H36 down vs H0	0.0732222	0.130215	0.120687	-8.2859	H42 down vs H0	0.192516	0.23102	0.219737	-4.55089	H57 down vs H0	0.881811	0.901407	0.849749	-1.17682	H81 down vs H0	0.0786781	0.229493	0.125791	-7.94972	H312 down vs H0	1.43555	47.912	173.552	1
Ile-Thr-Ser-Ser	406.207	9.20178	C16H30N4O8	Peptide(tetra-)	Hydrophobic peptide		6.33102e-10	1.45614e-08	0.406387	0.542269	2.17168	2.17168	H36 up vs H0	0.241022	0.337332	3.16302	3.16302	H42 up vs H0	3.8906e-07	3.34775e-06	635.795	635.795	H57 up vs H0	4.53275e-09	6.95022e-08	2680.82	2680.82	H81 up vs H0	1	1	1	1	No change between H312 and H0	29.4475	705.686	124.614	1
Ala-Phe-Val-Asp	450.212	9.20804	C21H30N4O7	Peptide(tetra-)	Hydrophobic peptide	Ala-Phe-Val-Asp	0.000612738	0.00111849	0.0237805	0.0635991	15.1362	15.1362	H36 up vs H0	0.00735009	0.019066	31.0836	31.0836	H42 up vs H0	1.888e-05	5.95777e-05	477.07	477.07	H57 up vs H0	0.000296938	0.000587069	112.436	112.436	H81 up vs H0	0.00665916	0.0366205	32.627	32.627	H312 up vs H0	6.26523	227.664	188.956	1
Lys-Phe-Cys	396.183	9.23143	C18H28N4O4S	Peptide(tri-)	Basic peptide	Lys-Phe-Cys	0.000115169	0.000245937	0.00191843	0.00900488	191.118	191.118	H36 up vs H0	0.000909759	0.00330386	383.919	383.919	H42 up vs H0	6.67075e-05	0.000181213	1872.88	1872.88	H57 up vs H0	0.00724179	0.0108157	84.3647	84.3647	H81 up vs H0	1	1	1	1	No change between H312 and H0	7.97443	524.252	341.856	1
Leu-Gln-His	396.213	9.24609	C17H28N6O5	Peptide(tri-)	Basic peptide		3.01588e-10	8.00369e-09	1	1	1	1	No change between H36 and H0	0.204821	0.295662	2.72116	2.72116	H42 up vs H0	3.33589e-08	6.22097e-07	384.118	384.118	H57 up vs H0	2.9001e-09	5.52812e-08	650.06	650.06	H81 up vs H0	0.000552878	0.00552878	20.6826	20.6826	H312 up vs H0	31.5199	485.853	80.1536	1
Adenine	135.054	9.25319	C5H5N5	Nucleotide Metabolism	Purine metabolism__Zeatin biosynthesis	Adenine	5.34782e-07	2.9758e-06	2.71338e-06	9.21508e-05	0.0705295	-14.1785	H36 down vs H0	4.42515e-06	5.55155e-05	0.0684331	-14.6128	H42 down vs H0	0.0177923	0.0262885	0.308704	-3.23935	H57 down vs H0	0.0155593	0.0219549	0.316184	-3.16271	H81 down vs H0	1.17873e-07	1.35554e-05	0.0351419	-28.4561	H312 down vs H0	15.1466	85.0333	29.193	1
(R)-3-Hydroxybutanoate	104.047	9.25613	C4H8O3	Lipid Metabolism	Synthesis and degradation of ketone bod	(R)-3-Hydroxybutanoate	4.42891e-06	1.56715e-05	0.00323101	0.0133345	3.14927	3.14927	H36 up vs H0	0.00121122	0.0041579	3.82497	3.82497	H42 up vs H0	0.000173295	0.000415186	5.03937	5.03937	H57 up vs H0	7.6138e-08	6.25419e-07	13.6348	13.6348	H81 up vs H0	0.0285194	0.108123	2.35505	2.35505	H312 up vs H0	11.9753	42.5081	18.4581	1
3-Methoxy-4-hydroxyphenylethyleneglycolsulfate	264.03	9.26639	C9H12O7S	0	0	3-Methoxy-4-hydroxyphenylethyleneglycol	4.00494e-05	9.76471e-05	0.491383	0.611603	0.543752	-1.83908	H36 down vs H0	0.275687	0.375195	0.36234	-2.75984	H42 down vs H0	0.00454223	0.00773861	0.0589048	-16.9765	H57 down vs H0	5.95327e-06	1.92063e-05	0.00715424	-139.777	H81 down vs H0	0.269549	0.54378	0.357521	-2.79704	H312 down vs H0	9.16696	198.24	112.453	1
Glu-Leu-Leu-Gln	501.28	9.26838	C22H39N5O8	Peptide(tetra-)	Hydrophobic peptide	Ala-Phe-Val-Asp	1.28248e-05	3.79789e-05	0.00734514	0.0265348	17.2602	17.2602	H36 up vs H0	0.00021419	0.00109475	81.1823	81.1823	H42 up vs H0	5.1243e-07	4.11135e-06	869.503	869.503	H57 up vs H0	1.30634e-05	3.7196e-05	190.316	190.316	H81 up vs H0	0.00496484	0.0295322	23.1112	23.1112	H312 up vs H0	10.5615	287.551	141.576	1
Ala-Val-Asn-Pro	399.212	9.26904	C17H29N5O6	Peptide(tetra-)	Hydrophobic peptide		1.20743e-09	2.38036e-08	0.373591	0.509607	2.25732	2.25732	H36 up vs H0	0.00470102	0.0131237	18.2531	18.2531	H42 up vs H0	1.67141e-07	1.89061e-06	762.676	762.676	H57 up vs H0	8.18483e-09	1.03614e-07	1795.11	1795.11	H81 up vs H0	1	1	1	1	No change between H312 and H0	27.7368	636.656	119.358	1
Leu-Phe-Asp	393.19	9.28709	C19H27N3O6	Peptide(tri-)	Hydrophobic peptide	6-Hydroxy-5-methoxyindoleglucuronide	0.000177544	0.00036031	0.644626	0.764247	0.659424	-1.51648	H36 down vs H0	0.0253593	0.0528638	9.12367	9.12367	H42 up vs H0	0.000232454	0.000538232	53.3259	53.3259	H57 up vs H0	0.00172085	0.00285599	22.5978	22.5978	H81 up vs H0	0.0239651	0.0955835	9.3431	9.3431	H312 up vs H0	7.51185	169.738	117.5	1
Suberylglycine	231.111	9.28728	C10H17NO5	0	0	Suberylglycine	2.18075e-05	5.87779e-05	0.893604	0.952994	1.10813	1.10813	H36 up vs H0	0.737072	0.794296	0.763807	-1.30923	H42 down vs H0	0.142834	0.175743	0.301266	-3.31932	H57 down vs H0	7.24714e-06	2.28334e-05	0.0143373	-69.7483	H81 down vs H0	0.322858	0.609943	0.449262	-2.22587	H312 down vs H0	9.89667	162.321	85.2885	1
1-(beta-D-Ribofuranosyl)-1,4-dihydronicotinamide	256.106	9.29593	C11H16N2O5	0	0	1-(beta-D-Ribofuranosyl)-1,4-dihydronic	0.0116968	0.0164375	0.280107	0.417731	0.463181	-2.15898	H36 down vs H0	0.000513623	0.00212295	0.0556481	-17.9701	H42 down vs H0	0.20932	0.250313	0.391351	-2.55525	H57 down vs H0	0.153469	0.187423	0.358475	-2.7896	H81 down vs H0	0.514861	0.797127	0.618037	-1.61802	H312 down vs H0	3.69363	51.0358	71.8496	1
Asn-Gln-Tyr-Tyr	586.238	9.30226	C27H34N6O9	Peptide(tetra-)	Hydrophobic peptide	Asn-Gln-Tyr-Tyr	0.0846111	0.09912	0.0719828	0.158684	15.2763	15.2763	H36 up vs H0	0.0831104	0.145549	15.4281	15.4281	H42 up vs H0	0.00335925	0.00594329	134.43	134.43	H57 up vs H0	0.0522056	0.0674567	19.249	19.249	H81 up vs H0	0.032378	0.117583	30.9443	30.9443	H312 up vs H0	2.20297	132.107	311.831	1
Leu-Gln-Ser	346.185	9.30897	C14H26N4O6	Peptide(tri-)	Hydrophobic peptide	Leu-Gln-Ser	0.000134783	0.000279134	0.00113909	0.00599981	65.5269	65.5269	H36 up vs H0	0.000124563	0.000747378	217.345	217.345	H42 up vs H0	1.80588e-05	5.74218e-05	521.191	521.191	H57 up vs H0	8.10722e-05	0.000184012	208.206	208.206	H81 up vs H0	0.0584964	0.183466	10.6409	10.6409	H312 up vs H0	7.80466	289.914	193.161	1
Asp-Leu-Leu-Gln	487.265	9.31154	C21H37N5O8	Peptide(tetra-)	Hydrophobic peptide	Ala-Phe-Thr-Gln	1.61636e-05	4.53369e-05	0.00533755	0.0203476	42.8522	42.8522	H36 up vs H0	0.000349938	0.00155386	201.771	201.771	H42 up vs H0	3.10634e-06	1.42892e-05	2058.59	2058.59	H57 up vs H0	2.11461e-05	5.569e-05	600.299	600.299	H81 up vs H0	0.193182	0.429379	5.61003	5.61003	H312 up vs H0	10.2685	445.266	225.484	1
Fasoracetam	196.121	9.33292	C10H16N2O2	0	0	Fasoracetam	0.542461	0.556164	0.236621	0.372758	0.283929	-3.52201	H36 down vs H0	0.196666	0.286891	0.237311	-4.21389	H42 down vs H0	0.278745	0.321628	0.300942	-3.3229	H57 down vs H0	0.96934	0.974992	1.04116	1.04116	H81 up vs H0	0.742748	0.943824	0.697609	-1.43347	H312 down vs H0	0.826369	25.333	159.41	1
6-Hydroxy-5-methoxyindoleglucuronide	339.096	9.37483	C15H17NO8	0	0	6-Hydroxy-5-methoxyindoleglucuronide	7.22146e-06	2.37276e-05	9.62355e-05	0.00105401	33.0959	33.0959	H36 up vs H0	5.88646e-06	6.65893e-05	89.9044	89.9044	H42 up vs H0	1.3614e-06	7.76337e-06	141.049	141.049	H57 up vs H0	1.96561e-06	7.8727e-06	102.458	102.458	H81 up vs H0	0.00438813	0.027034	11.9214	11.9214	H312 up vs H0	11.3112	185.67	85.3567	1
5-Methylcytosine	125.059	9.37639	C5H7N3O	Nucleotide Metabolism	Pyrimidine metabolism	5-Methylcytosine	5.70489e-05	0.000133544	0.00232215	0.0105063	0.035506	-28.1642	H36 down vs H0	3.20103e-05	0.000243145	0.00561131	-178.212	H42 down vs H0	3.96473e-06	1.74285e-05	0.00246281	-406.041	H57 down vs H0	5.8759e-05	0.000138848	0.00878417	-113.841	H81 down vs H0	0.0101697	0.0512198	0.0571281	-17.5045	H312 down vs H0	8.75715	243.021	144.306	1
Homolanthionine	268.073	9.40283	C8H16N2O6S	0	0	Homolanthionine	0.0289791	0.0376565	0.0144926	0.0440524	0.513271	-1.94829	H36 down vs H0	0.00260934	0.00782801	0.412596	-2.42368	H42 down vs H0	0.010771	0.0168908	0.481677	-2.07608	H57 down vs H0	0.01221	0.0175519	0.503711	-1.98527	H81 down vs H0	0.00335847	0.02126	0.423838	-2.35939	H312 down vs H0	2.99299	5.50559	9.56536	1
Dihydroclavaminic acid	200.08	9.40991	C8H12N2O4	Biosynthesis of Secondary Metabolites	Clavulanic acid biosynthesis	Dihydroclavaminic acid	1.07504e-08	1.30136e-07	0.114631	0.2191	1.6476	1.6476	H36 up vs H0	0.0198137	0.043499	2.21037	2.21037	H42 up vs H0	5.16994e-06	2.12337e-05	6.20463	6.20463	H57 up vs H0	7.30062e-09	9.50458e-08	12.9833	12.9833	H81 up vs H0	0.731181	0.943039	1.11733	1.11733	H312 up vs H0	22.533	59.8309	13.8073	1
Ala-Leu-Ser-Ser	376.196	9.41632	C15H28N4O7	Peptide(tetra-)	Hydrophobic peptide	Ala-Leu-Ser-Ser	1.31945e-11	5.69012e-10	5.24683e-10	1.20677e-07	2095.31	2095.31	H36 up vs H0	2.53812e-10	5.83767e-08	3920.84	3920.84	H42 up vs H0	8.93624e-12	2.05534e-09	15949.8	15949.8	H57 up vs H0	2.82679e-12	3.90097e-10	17332.5	17332.5	H81 up vs H0	6.97587e-06	0.000240668	106.978	106.978	H312 up vs H0	41.6878	755.485	94.2367	1
3',5'-Cyclic AMP	329.053	9.43961	C10H12N5O6P	Nucleotide Metabolism	Purine metabolism	3',5'-Cyclic AMP	1.63658e-05	4.57182e-05	3.08919e-05	0.000470337	0.00182887	-546.786	H36 down vs H0	4.17551e-05	0.000299384	0.00160449	-623.25	H42 down vs H0	3.0018e-06	1.39949e-05	0.000430459	-2323.1	H57 down vs H0	1.52421e-06	6.41284e-06	0.000430459	-2323.1	H81 down vs H0	1.52828e-05	0.000458485	0.000973964	-1026.73	H312 down vs H0	10.2529	456.74	231.646	1
L-2-Aminoadipate	161.069	9.45641	C6H11NO4	Amino Acid Metabolism	Lysine biosynthesis__Lysine degradation	L-2-Aminoadipate	7.77309e-05	0.000171905	0.0502485	0.119146	2.12697	2.12697	H36 up vs H0	0.0202053	0.0441192	2.58539	2.58539	H42 up vs H0	0.00378124	0.00658853	3.39083	3.39083	H57 up vs H0	0.000682871	0.00125314	4.12378	4.12378	H81 up vs H0	0.135555	0.337664	0.553558	-1.8065	H312 down vs H0	8.40749	32.2422	19.9417	1
N6-Acetyl-N6-hydroxy-L-lysine	204.111	9.47185	C8H16N2O4	Amino Acid Metabolism	Lysine degradation	Dihydroclavaminic acid	9.7863e-06	3.08335e-05	0.0102625	0.0343743	3.19197	3.19197	H36 up vs H0	0.0015694	0.00513217	4.69434	4.69434	H42 up vs H0	9.1984e-06	3.30567e-05	11.0874	11.0874	H57 up vs H0	2.17201e-06	8.51525e-06	12.6351	12.6351	H81 up vs H0	0.174221	0.406495	1.84389	1.84389	H312 up vs H0	10.9105	54.4548	25.9535	1
Trp-Ala-Gly	166.074	9.50277	C16H20N4O4	Peptide(tri-)	Hydrophobic peptide	Trp-Ala-Gly	5.67999e-07	3.06187e-06	0.00278598	0.0118662	0.0252463	-39.6098	H36 down vs H0	0.0057316	0.0154485	0.0301189	-33.2018	H42 down vs H0	2.71691e-07	2.56804e-06	0.000338349	-2955.53	H57 down vs H0	1.27824e-07	9.79983e-07	0.000338349	-2955.53	H81 down vs H0	0.0139165	0.0640158	0.0465113	-21.5001	H312 down vs H0	15.049	529.851	183.084	1
5,6-Dihydroxyindole	149.048	9.51234	C8H7NO2	Amino Acid Metabolism	Tyrosine metabolism	Aniline	1.61488e-05	4.53369e-05	0.00252941	0.0110461	0.151773	-6.58879	H36 down vs H0	0.00034024	0.00153441	0.0881489	-11.3444	H42 down vs H0	1.04537e-06	6.75697e-06	0.0239311	-41.7867	H57 down vs H0	4.11281e-06	1.41892e-05	0.0378862	-26.3949	H81 down vs H0	6.73342e-05	0.00122265	0.0613463	-16.3009	H312 down vs H0	10.2697	92.7769	46.9772	1
N-Acetyl-4-O-acetylneuraminate	351.117	9.51727	C13H21NO10	0	0	N-Acetyl-4-O-acetylneuraminate	6.02671e-07	3.19879e-06	0.682392	0.791594	0.646453	-1.5469	H36 down vs H0	0.0204991	0.0446195	0.0660679	-15.136	H42 down vs H0	3.07855e-05	9.1516e-05	0.00391915	-255.157	H57 down vs H0	1.24804e-06	5.4503e-06	0.00135463	-738.208	H81 down vs H0	0.752974	0.951646	0.704539	-1.41937	H312 down vs H0	14.9534	471.653	164.015	1
D-Proline	115.063	9.51982	C5H9NO2	Amino Acid Metabolism	Arginine and proline metabolism	D-Proline	8.4686e-08	6.88855e-07	0.000637678	0.00382607	2.53448	2.53448	H36 up vs H0	2.97252e-06	4.5567e-05	4.40853	4.40853	H42 up vs H0	1.96573e-08	4.2386e-07	7.32406	7.32406	H57 up vs H0	4.79971e-08	4.35764e-07	6.14902	6.14902	H81 up vs H0	0.0051197	0.0299372	2.14949	2.14949	H312 up vs H0	18.3579	29.9235	8.47601	1
Trp-Gln-Gln	460.208	9.52795	C21H28N6O6	Peptide(tri-)	Hydrophobic peptide	Trp-Gln-Gln	1.26121e-08	1.5004e-07	1	1	1	1	No change between H36 and H0	1	1	1	1	No change between H42 and H0	2.87596e-05	8.62789e-05	159.184	159.184	H57 up vs H0	3.60078e-08	3.54934e-07	1615.75	1615.75	H81 up vs H0	0.0788032	0.229493	6.25617	6.25617	H312 up vs H0	22.1859	579.732	135.879	1
1(2H)-Isoquinolinone	145.053	9.57457	C9H7NO	0	0	3-Methyleneoxindole	0.190663	0.21083	0.199478	0.325389	0.564741	-1.77072	H36 down vs H0	0.936153	0.956956	1.03735	1.03735	H42 up vs H0	0.313333	0.355008	1.59373	1.59373	H57 up vs H0	0.823175	0.850389	1.10293	1.10293	H81 up vs H0	0.270314	0.54378	0.600154	-1.66624	H312 down vs H0	1.61712	8.64522	27.7995	1
Val-Gly-Pro	271.153	9.58578	C12H21N3O4	Peptide(tri-)	Hydrophobic peptide	Val-Gly-Pro	1.68138e-06	7.34272e-06	3.1193e-05	0.000470337	406.395	406.395	H36 up vs H0	1.49797e-05	0.000137813	751.518	751.518	H42 up vs H0	1.63587e-07	1.88125e-06	6822.6	6822.6	H57 up vs H0	8.07617e-07	3.86983e-06	2184.19	2184.19	H81 up vs H0	0.00698445	0.0373587	38.6742	38.6742	H312 up vs H0	13.3655	541.456	210.66	1
4'-O-Methylisoflavone	252.078	9.59375	C16H12O3	0	0	4'-O-Methylisoflavone	0.516498	0.531123	0.291631	0.426941	0.82573	-1.21105	H36 down vs H0	0.124944	0.202374	0.744835	-1.34258	H42 down vs H0	0.117468	0.146042	0.740182	-1.35102	H57 down vs H0	0.619159	0.667531	0.914396	-1.09362	H81 down vs H0	0.190905	0.427678	0.779174	-1.28341	H312 down vs H0	0.866864	0.77862	4.67066	1
(R)-Lactate	90.0318	9.59438	C3H6O3	Carbohydrate Metabolism	Pyruvate metabolism	(R)-Lactate	1.04204e-08	1.30136e-07	7.49061e-08	8.6142e-06	41.6591	41.6591	H36 up vs H0	1.36053e-08	1.17346e-06	71.7766	71.7766	H42 up vs H0	6.6512e-09	2.11569e-07	84.5102	84.5102	H57 up vs H0	4.78418e-09	7.03328e-08	75.2579	75.2579	H81 up vs H0	0.000238508	0.00322687	9.41777	9.41777	H312 up vs H0	22.6012	163.184	37.5447	1
Nicotyrine	158.084	9.6005	C10H10N2	0	0	Nicotyrine	5.14252e-06	1.7566e-05	0.00590782	0.0220346	5.2153	5.2153	H36 up vs H0	0.00108454	0.00374701	8.28376	8.28376	H42 up vs H0	3.32006e-06	1.49728e-05	29.5263	29.5263	H57 up vs H0	3.51026e-07	2.03536e-06	41.5664	41.5664	H81 up vs H0	0.0103404	0.0515362	4.90603	4.90603	H312 up vs H0	11.7698	101.353	44.7785	1
2-Hydroxyadenine	151.049	9.66522	C5H5N5O	0	0	2-Hydroxyadenine	0.000635034	0.00114705	0.0429979	0.105208	0.206601	-4.84025	H36 down vs H0	0.25252	0.349878	0.404197	-2.47404	H42 down vs H0	0.274083	0.31678	2.37471	2.37471	H57 up vs H0	0.0121477	0.0174988	7.37395	7.37395	H81 up vs H0	0.893423	1	0.900571	-1.11041	H312 down vs H0	6.23087	97.1347	81.0642	1
N2-Acetyl-L-aminoadipate	203.08	9.68623	C8H13NO5	Amino Acid Metabolism	Lysine biosynthesis	N2-Acetyl-L-aminoadipate	1.43196e-05	4.15147e-05	0.965224	1	0.991347	-1.00873	H36 down vs H0	0.136503	0.214863	0.728465	-1.37275	H42 down vs H0	0.000789313	0.00163551	0.456941	-2.18847	H57 down vs H0	0.000120291	0.000260191	0.409946	-2.43935	H81 down vs H0	0.313029	0.59831	1.23633	1.23633	H312 up vs H0	10.4213	11.5277	5.75206	1
Aspartyl-L-proline	230.09	9.68958	C9H14N2O5	Peptide(di-)	Acidic peptide	Aspartyl-L-proline	0.114731	0.131502	0.628041	0.748442	0.647694	-1.54394	H36 down vs H0	0.70444	0.773987	0.701261	-1.426	H42 down vs H0	0.146404	0.17943	3.99579	3.99579	H57 up vs H0	0.0830049	0.10567	4.939	4.939	H81 up vs H0	0.596845	0.853084	1.64131	1.64131	H312 up vs H0	1.9831	44.1713	115.824	1
Met-Trp-Asp	450.158	9.69777	C20H26N4O6S	Peptide(tri-)	Hydrophobic peptide	Met-Trp-Asp	5.87563e-12	3.37849e-10	1	1	1	1	No change between H36 and H0	0.176979	0.264893	3.25698	3.25698	H42 up vs H0	2.67686e-09	1.08649e-07	1823.66	1823.66	H57 up vs H0	4.09962e-10	1.28579e-08	2672.3	2672.3	H81 up vs H0	1	1	1	1	No change between H312 and H0	44.7386	842.643	97.941	1
Ala-Phe-Phe-Thr	242.116	9.73304	C25H32N4O6	Peptide(tetra-)	Hydrophobic peptide		0.207141	0.227229	0.438788	0.56941	0.480858	-2.07962	H36 down vs H0	0.0476644	0.0916112	0.132452	-7.54988	H42 down vs H0	0.907975	0.917281	1.12022	1.12022	H57 up vs H0	0.813328	0.843904	1.24872	1.24872	H81 up vs H0	0.831759	0.994651	0.811636	-1.23208	H312 down vs H0	1.55713	38.3188	127.965	1
Pro-His	252.122	9.7461	C11H16N4O3	Peptide(di-)	Basic peptide	Pro-His	0.0672123	0.0800975	0.206276	0.335684	0.413786	-2.41671	H36 down vs H0	0.724001	0.786989	1.28892	1.28892	H42 up vs H0	0.246375	0.289379	2.32379	2.32379	H57 up vs H0	0.144708	0.177351	2.78327	2.78327	H81 up vs H0	0.591421	0.853084	0.679481	-1.47171	H312 down vs H0	2.37017	31.1733	68.3923	1
N-Benzylformamide	135.068	9.75462	C8H9NO	0	0	2-Phenylacetamide	0.00034425	0.000665358	0.000136342	0.0012061	3.50262	3.50262	H36 up vs H0	2.76726e-05	0.000217272	4.42039	4.42039	H42 up vs H0	8.72643e-05	0.000228077	3.89146	3.89146	H57 up vs H0	0.000410733	0.000791637	3.11351	3.11351	H81 up vs H0	0.00465544	0.0281777	2.47671	2.47671	H312 up vs H0	6.8317	15.2517	11.6089	1
1-Methyluric acid	182.044	9.78263	C6H6N4O3	Biosynthesis of Secondary Metabolites	Caffeine metabolism	1-Methyluric acid	0.0346544	0.0439087	0.563534	0.681351	0.494267	-2.0232	H36 down vs H0	0.599735	0.681248	0.512565	-1.95097	H42 down vs H0	0.00224545	0.00421022	0.0140744	-71.0512	H57 down vs H0	0.203215	0.243435	0.207599	-4.81697	H81 down vs H0	0.256286	0.524582	0.232191	-4.3068	H312 down vs H0	2.85871	117.697	214.09	1
3-ureidoacrylate	130.038	9.79153	C4H6N2O3	0	0	3-ureidoacrylate	4.88036e-06	1.68248e-05	0.882032	0.943569	1.19792	1.19792	H36 up vs H0	0.925785	0.94917	1.12568	1.12568	H42 up vs H0	0.000104719	0.000264841	0.0031785	-314.613	H57 down vs H0	6.12366e-05	0.000142748	0.0031785	-314.613	H81 down vs H0	0.59513	0.853084	0.508044	-1.96833	H312 down vs H0	11.8415	488.051	214.319	1
Glu-Gln-Pro-Tyr	535.228	9.8033	C24H33N5O9	Peptide(tetra-)	Hydrophobic peptide		4.90112e-06	1.68248e-05	0.00245775	0.0108708	64.3424	64.3424	H36 up vs H0	0.000438135	0.00185468	185.036	185.036	H42 up vs H0	4.99429e-06	2.08703e-05	1682.76	1682.76	H57 up vs H0	5.82404e-06	1.90454e-05	1139.82	1139.82	H81 up vs H0	0.502484	0.789781	2.41591	2.41591	H312 up vs H0	11.8357	518.062	227.61	1
Creatinine	113.059	9.81468	C4H7N3O	Amino Acid Metabolism	Arginine and proline metabolism	Creatinine	3.24777e-07	1.96575e-06	0.000315556	0.00217733	0.461415	-2.16725	H36 down vs H0	6.57539e-06	7.20162e-05	0.33482	-2.98668	H42 down vs H0	1.18448e-06	6.98538e-06	0.294229	-3.39872	H57 down vs H0	4.32213e-07	2.44448e-06	0.287777	-3.47492	H81 down vs H0	1.57288e-08	5.34304e-06	0.208684	-4.79194	H312 down vs H0	15.9717	15.7435	5.1257	1
Pyrazinamide	123.043	9.8343	C5H5N3O	0	0	Creatinine	0.000463001	0.000870492	0.0128182	0.0397287	0.451351	-2.21557	H36 down vs H0	0.000289752	0.00136498	0.272443	-3.67049	H42 down vs H0	0.00100087	0.00203716	0.315954	-3.16501	H57 down vs H0	6.51684e-05	0.000149887	0.243291	-4.11031	H81 down vs H0	7.24957e-05	0.00128262	0.231353	-4.32239	H312 down vs H0	6.53762	16.4372	13.0741	1
7-Methylxanthine	166.049	9.85362	C6H6N4O2	Biosynthesis of Secondary Metabolites	Caffeine metabolism	Creatinine	0.00227536	0.00368544	0.0116733	0.0381734	0.421258	-2.37384	H36 down vs H0	0.000373329	0.00162011	0.256657	-3.89625	H42 down vs H0	0.00182669	0.00349145	0.314992	-3.17468	H57 down vs H0	0.000330963	0.000648763	0.267997	-3.73139	H81 down vs H0	0.000493036	0.00507754	0.265921	-3.76051	H312 down vs H0	5.05857	14.5797	14.9873	1
Quinoline	129.058	9.85858	C9H7N	0	0	Isoquinoline	0.000985632	0.00172174	0.165025	0.283649	0.613025	-1.63125	H36 down vs H0	0.291196	0.391667	0.680136	-1.47029	H42 down vs H0	0.151146	0.183934	1.6975	1.6975	H57 up vs H0	0.00864335	0.0127434	2.64555	2.64555	H81 up vs H0	0.542634	0.815487	0.801937	-1.24698	H312 down vs H0	5.81529	19.3659	17.3169	1
5-Hydroxy-L-tryptophan	220.085	9.8607	C11H12N2O3	Amino Acid Metabolism	Tryptophan metabolism	5-Hydroxy-L-tryptophan	0.0247751	0.0325373	0.822587	0.903797	1.33765	1.33765	H36 up vs H0	0.599508	0.681248	2.04047	2.04047	H42 up vs H0	0.028096	0.0398894	22.65	22.65	H57 up vs H0	0.0133562	0.0190565	30.2736	30.2736	H81 up vs H0	0.0241806	0.0958887	24.8136	24.8136	H312 up vs H0	3.11164	145.698	243.483	1
dTTP	240.995	9.86217	C10H17N2O14P3	Nucleotide Metabolism	Pyrimidine metabolism	dTTP	2.69978e-05	7.02961e-05	0.00367085	0.0147261	0.323222	-3.09385	H36 down vs H0	0.033576	0.0671521	0.436426	-2.29134	H42 down vs H0	3.09032e-05	9.1516e-05	0.155784	-6.41916	H57 down vs H0	1.97388e-06	7.8727e-06	0.116131	-8.61095	H81 down vs H0	9.92973e-05	0.00163131	0.18343	-5.45166	H312 down vs H0	9.6366	34.2321	18.472	1
L-2-Amino-3-oxobutanoic acid	117.043	9.89896	C4H7NO3	Amino Acid Metabolism	Glycine, serine and threonine metabolis	L-2-Amino-3-oxobutanoic acid	0.0328276	0.0421023	0.189256	0.311663	1.55874	1.55874	H36 up vs H0	0.127453	0.205955	1.71856	1.71856	H42 up vs H0	0.0666911	0.0881549	1.93135	1.93135	H57 up vs H0	0.00119699	0.00206999	3.31146	3.31146	H81 up vs H0	0.271193	0.543962	1.472	1.472	H312 up vs H0	2.89925	8.92102	16.0004	1
3-Methylguanine	165.065	9.92423	C6H7N5O	0	0	Orotate(Fragment)	0.000165733	0.000338332	0.000131338	0.001177	0.171017	-5.84736	H36 down vs H0	9.12394e-06	9.39629e-05	0.104252	-9.59212	H42 down vs H0	0.000525732	0.00111617	0.196516	-5.08863	H57 down vs H0	0.000286375	0.000567813	0.192187	-5.20327	H81 down vs H0	4.04094e-05	0.000844924	0.131574	-7.60027	H312 down vs H0	7.58445	33.395	22.8961	1
Ala-Gly-Tyr	309.133	9.94144	C14H19N3O5	Peptide(tri-)	Hydrophobic peptide	Ala-Gly-Tyr	0.000872696	0.00154005	0.00157287	0.00758938	68.9455	68.9455	H36 up vs H0	0.000825904	0.00304745	113.99	113.99	H42 up vs H0	4.33257e-05	0.000123024	465.347	465.347	H57 up vs H0	0.000342267	0.000667131	139.841	139.841	H81 up vs H0	0.000349705	0.00408977	172.415	172.415	H312 up vs H0	5.92905	242.059	212.295	1
Uridine	244.07	9.954	C9H12N2O6	Nucleotide Metabolism	Pyrimidine metabolism	Uridine	3.34262e-05	8.41756e-05	2.74803e-05	0.0004535	0.0113247	-88.3028	H36 down vs H0	0.107688	0.180791	0.215223	-4.64634	H42 down vs H0	0.896406	0.906921	0.88584	-1.12887	H57 down vs H0	0.523374	0.575962	1.77004	1.77004	H81 up vs H0	0.686576	0.931386	0.686466	-1.45674	H312 down vs H0	9.38054	207.438	114.991	1
Orotate(Fragment)	112.027	9.96334	C4H4N2O2	Nucleotide Metabolism	Pyrimidine metabolism	Orotate(Fragment)	3.75681e-09	5.89136e-08	1.99152e-09	3.43537e-07	0.0677712	-14.7555	H36 down vs H0	8.72646e-10	1.50532e-07	0.0534279	-18.7168	H42 down vs H0	5.30708e-06	2.14347e-05	0.16696	-5.98948	H57 down vs H0	0.00176299	0.00291718	0.350951	-2.8494	H81 down vs H0	1.9056e-06	9.39191e-05	0.147448	-6.78207	H312 down vs H0	24.9267	63.8769	13.3254	1
Mercaptopyruvate	119.988	9.97723	C3H4O3S	Amino Acid Metabolism	Cysteine metabolism	Mercaptopyruvate	0.00365646	0.00556945	0.468619	0.591128	0.339769	-2.94317	H36 down vs H0	0.0686155	0.123615	0.0543563	-18.3971	H42 down vs H0	0.00147801	0.00289724	0.00430367	-232.36	H57 down vs H0	0.00680197	0.0102621	0.0133627	-74.835	H81 down vs H0	0.97554	1	0.953651	-1.0486	H312 down vs H0	4.64819	284.186	317.923	1
Orotate	156.017	9.99657	C5H4N2O4	Nucleotide Metabolism	Pyrimidine metabolism	Orotate	9.1434e-10	1.9118e-08	0.0879513	0.183343	0.54226	-1.84413	H36 down vs H0	0.00256342	0.00772383	0.300315	-3.32984	H42 down vs H0	5.85164e-08	8.77747e-07	0.0670159	-14.9218	H57 down vs H0	2.50457e-10	9.09553e-09	0.032571	-30.7021	H81 down vs H0	0.00271494	0.0183309	0.302806	-3.30244	H312 down vs H0	28.4632	96.26	17.5859	1
L-1-Pyrroline-3-hydroxy-5-carboxylate	129.043	10.0297	C5H7NO3	Amino Acid Metabolism	Arginine and proline metabolism	L-1-Pyrroline-3-hydroxy-5-carboxylate	2.82424e-10	7.79491e-09	0.000736858	0.00434557	3.37666	3.37666	H36 up vs H0	0.000119089	0.000720799	4.4917	4.4917	H42 up vs H0	5.12236e-08	8.30334e-07	12.2985	12.2985	H57 up vs H0	2.00565e-11	1.3839e-09	34.9763	34.9763	H81 up vs H0	0.0207434	0.0862227	2.26653	2.26653	H312 up vs H0	31.7091	91.0939	14.9385	1
Dap	109.064	10.0832	C5H7N3	0	0	L-Lysine 1,6-lactam	8.38224e-07	4.25205e-06	0.00224182	0.0103124	1.7857	1.7857	H36 up vs H0	5.79335e-05	0.000395784	2.35467	2.35467	H42 up vs H0	4.1276e-08	7.12011e-07	3.91677	3.91677	H57 up vs H0	6.19511e-07	3.28818e-06	3.06102	3.06102	H81 up vs H0	0.00072396	0.00684291	1.98287	1.98287	H312 up vs H0	14.4293	11.9817	4.31794	1
L-Arabinose	150.053	10.0863	C5H10O5	Carbohydrate Metabolism	Pentose and glucuronate interconversion	D-Xylulose	8.33819e-05	0.00018364	0.0044618	0.0173364	2.49883	2.49883	H36 up vs H0	0.00516042	0.0141297	2.55565	2.55565	H42 up vs H0	0.000284142	0.000640712	3.62351	3.62351	H57 up vs H0	3.18906e-06	1.15207e-05	5.67167	5.67167	H81 up vs H0	0.123637	0.322901	1.63052	1.63052	H312 up vs H0	8.32927	20.4559	12.7707	1
L-Phenylalanine	165.079	10.1095	C9H11NO2	Amino Acid Metabolism	Phenylalanine metabolism__Phenylalanine	L-Phenylalanine	4.06026e-06	1.47452e-05	0.000232602	0.00172575	8.18319	8.18319	H36 up vs H0	2.8247e-05	0.000218993	13.5563	13.5563	H42 up vs H0	8.53856e-07	5.77608e-06	27.127	27.127	H57 up vs H0	2.45625e-07	1.54074e-06	30.1005	30.1005	H81 up vs H0	0.000801686	0.00737551	7.03921	7.03921	H312 up vs H0	12.096	83.3346	35.8252	1
Ala-Tyr-His	389.17	10.1168	C18H23N5O5	Peptide(tri-)	Basic peptide	Ala-Tyr-His	2.38688e-08	2.42199e-07	1	1	1	1	No change between H36 and H0	0.399818	0.502504	2.39012	2.39012	H42 up vs H0	8.69143e-05	0.000228026	112.536	112.536	H57 up vs H0	3.45236e-08	3.50313e-07	1846.1	1846.1	H81 up vs H0	0.362231	0.657735	2.57039	2.57039	H312 up vs H0	20.8411	561.836	140.182	1
5-6-Dihydrouridine	246.085	10.122	C9H14N2O6	0	0	5-6-Dihydrouridine	0.00452754	0.00677658	0.00608772	0.0224627	0.306144	-3.26644	H36 down vs H0	0.0355323	0.0702502	0.399259	-2.50464	H42 down vs H0	0.00376235	0.00657221	0.267761	-3.73468	H57 down vs H0	0.000170719	0.000359005	0.175887	-5.68547	H81 down vs H0	0.00155933	0.0122266	0.231583	-4.3181	H312 down vs H0	4.46747	19.9247	23.1918	1
N-Acetylornithine	174.1	10.1482	C7H14N2O3	Amino Acid Metabolism	Arginine and proline metabolism	N-Acetylornithine	1.23623e-05	3.68641e-05	0.000165641	0.00134462	196.781	196.781	H36 up vs H0	2.771e-05	0.000217272	582.489	582.489	H42 up vs H0	1.15827e-05	3.95645e-05	883.256	883.256	H57 up vs H0	9.07346e-06	2.71025e-05	740.132	740.132	H81 up vs H0	0.143954	0.355056	6.62605	6.62605	H312 up vs H0	10.6085	434.784	213.119	1
Ala-Leu-Asp-Ser	404.191	10.1537	C16H28N4O8	Peptide(tetra-)	Hydrophobic peptide	Ala-Leu-Asp-Ser	3.47698e-06	1.30387e-05	0.000949644	0.00520043	96.4365	96.4365	H36 up vs H0	0.000784624	0.00295842	129.898	129.898	H42 up vs H0	5.02097e-06	2.08703e-05	1526.45	1526.45	H57 up vs H0	2.40908e-05	6.2257e-05	536.326	536.326	H81 up vs H0	1	1	1	1	No change between H312 and H0	12.3132	525.284	221.834	1
Ala-Thr-Thr-Tyr	454.207	10.1581	C20H30N4O8	Peptide(tetra-)	Hydrophobic peptide	Ala-Thr-Thr-Tyr	1.26921e-07	9.38736e-07	0.00173997	0.00833737	67.1523	67.1523	H36 up vs H0	0.000196438	0.00105895	233.397	233.397	H42 up vs H0	3.082e-07	2.87376e-06	5352.74	5352.74	H57 up vs H0	1.08885e-06	4.9428e-06	2031.08	2031.08	H81 up vs H0	1	1	1	1	No change between H312 and H0	17.6138	726.431	214.459	1
HEPES	238.099	10.1844	C8H18N2O4S	Medium Component	0	HEPES	0.258221	0.278395	0.14136	0.253347	0.793224	-1.26068	H36 down vs H0	0.0252926	0.0528638	0.684828	-1.46022	H42 down vs H0	0.0576166	0.077496	0.72844	-1.3728	H57 down vs H0	0.308479	0.357132	0.853309	-1.17191	H81 down vs H0	0.280274	0.560548	0.838719	-1.19229	H312 down vs H0	1.39659	0.924424	3.44196	1
methiin	151.03	10.1952	C4H9NO3S	0	0	N-Acetylputrescine	0.0363046	0.0456287	0.0498341	0.118571	0.297858	-3.35731	H36 down vs H0	0.00106665	0.00374701	0.103947	-9.62031	H42 down vs H0	0.0323047	0.0450308	0.248873	-4.01812	H57 down vs H0	0.0334203	0.045039	0.266507	-3.75225	H81 down vs H0	0.0228529	0.0916775	0.225908	-4.42658	H312 down vs H0	2.82397	27.7824	51.158	1
N-Acetylputrescine	130.111	10.2028	C6H14N2O	Amino Acid Metabolism	Arginine and proline metabolism	N-Acetylputrescine	0.00475118	0.00709592	0.00769518	0.0275113	0.344604	-2.90188	H36 down vs H0	0.000870148	0.00317673	0.234919	-4.25678	H42 down vs H0	0.00157155	0.00303745	0.256737	-3.89503	H57 down vs H0	0.0037519	0.00587032	0.309106	-3.23513	H81 down vs H0	0.000345858	0.00408977	0.204915	-4.88008	H312 down vs H0	4.42704	17.0886	20.0722	1
4-Aminobutanal	87.0684	10.2047	C4H9NO	Amino Acid Metabolism	Arginine and proline metabolism__beta-A	N-Acetylputrescine	0.00228172	0.00368708	0.00361231	0.0146617	0.35521	-2.81523	H36 down vs H0	0.000188198	0.00103061	0.230132	-4.34533	H42 down vs H0	0.000856857	0.00176487	0.28002	-3.57118	H57 down vs H0	0.00111344	0.00194993	0.305507	-3.27325	H81 down vs H0	0.00045221	0.00472765	0.257664	-3.88102	H312 down vs H0	5.05612	15.0236	15.4511	1
(S)-AMPA	186.064	10.2094	C7H10N2O4	0	0		5.32259e-06	1.80916e-05	0.134601	0.247039	2.34201	2.34201	H36 up vs H0	0.0675243	0.122288	2.99831	2.99831	H42 up vs H0	0.000484315	0.00104407	9.9192	9.9192	H57 up vs H0	3.45293e-07	2.01908e-06	41.7868	41.7868	H81 up vs H0	0.000622916	0.00614017	9.38197	9.38197	H312 up vs H0	11.7228	101.037	44.8183	1
D-Apiitol	136.074	10.2152	C5H12O4	0	0	D-Apiitol	0.924597	0.927284	0.449154	0.576053	0.739904	-1.35153	H36 down vs H0	0.651858	0.723997	0.829535	-1.20549	H42 down vs H0	0.771065	0.792898	0.886574	-1.12794	H57 down vs H0	0.486484	0.539669	0.758244	-1.31884	H81 down vs H0	0.307206	0.594143	0.652817	-1.53182	H312 down vs H0	0.271453	1.18397	22.6804	1
Leu-Val-Asp	345.19	10.2162	C15H27N3O6	Peptide(tri-)	Hydrophobic peptide	Leu-Val-Asp	3.02346e-07	1.87367e-06	8.65501e-05	0.000995326	94.4202	94.4202	H36 up vs H0	1.15729e-06	2.28151e-05	627.148	627.148	H42 up vs H0	1.7586e-07	1.95715e-06	1352.34	1352.34	H57 up vs H0	1.30762e-07	9.91488e-07	1119.63	1119.63	H81 up vs H0	0.0156981	0.0689919	14.0889	14.0889	H312 up vs H0	16.0927	438.446	141.674	1
indigo	131.037	10.2288	C16H10N2O2	0	indigo biosynthesis	indigo	0.0498855	0.0619706	0.0170037	0.0495044	0.445556	-2.24439	H36 down vs H0	0.00783431	0.0200677	0.385183	-2.59617	H42 down vs H0	0.00961901	0.0153637	0.396337	-2.52311	H57 down vs H0	0.012825	0.0183595	0.4286	-2.33318	H81 down vs H0	0.197666	0.434361	0.645494	-1.5492	H312 down vs H0	2.58848	7.38311	14.8319	1
Actinidine	147.105	10.3051	C10H13N	0	0	Actinidine	2.92675e-08	2.92675e-07	0.00816338	0.0287384	0.111676	-8.9545	H36 down vs H0	0.0207669	0.0450602	0.139725	-7.15694	H42 down vs H0	1.49163e-08	3.54906e-07	0.00157492	-634.952	H57 down vs H0	1.73514e-07	1.21601e-06	0.00453271	-220.619	H81 down vs H0	0.124013	0.322901	0.280623	-3.5635	H312 down vs H0	20.4249	339.593	86.4573	1
2-Oxoglutaramate	145.038	10.3182	C5H7NO4	Amino Acid Metabolism	Glutamate metabolism	2-Oxoglutaramate	1.29312e-05	3.81306e-05	0.000149999	0.00127777	6.51325	6.51325	H36 up vs H0	3.2067e-05	0.000243145	9.16317	9.16317	H42 up vs H0	8.37303e-05	0.000221356	7.80458	7.80458	H57 up vs H0	1.43564e-06	6.08068e-06	13.8019	13.8019	H81 up vs H0	0.0844732	0.241853	2.20768	2.20768	H312 up vs H0	10.551	53.5002	26.3673	1
Methyl ethyl ketone	72.0575	10.3252	C4H8O	0	lotaustralin degradation	Butanal	0.153209	0.172173	0.235527	0.372237	1.77909	1.77909	H36 up vs H0	0.363841	0.467505	1.58089	1.58089	H42 up vs H0	0.44552	0.488759	1.46793	1.46793	H57 up vs H0	0.00890427	0.0131001	3.82474	3.82474	H81 up vs H0	0.308679	0.59494	1.6728	1.6728	H312 up vs H0	1.77487	11.3377	33.2171	1
Glycerol	92.0474	10.3432	C3H8O3	Carbohydrate Metabolism	Galactose metabolism__Glycerolipid meta	Glycerol	0.000260211	0.000510113	0.010698	0.03566	2.11626	2.11626	H36 up vs H0	0.14632	0.225359	1.53164	1.53164	H42 up vs H0	0.00117652	0.00237368	2.82159	2.82159	H57 up vs H0	8.21977e-06	2.50958e-05	4.52229	4.52229	H81 up vs H0	0.00671055	0.0366205	2.31337	2.31337	H312 up vs H0	7.11522	15.0059	10.9667	1
Deoxycytidine	227.091	10.3573	C9H13N3O4	Nucleotide Metabolism	Pyrimidine metabolism	Deoxycytidine	4.70488e-12	2.95124e-10	1.53289e-11	1.0577e-08	0.00086564	-1155.21	H36 down vs H0	3.92446e-11	2.70788e-08	0.00086564	-1155.21	H42 down vs H0	3.92446e-11	5.6816e-09	0.00086564	-1155.21	H57 down vs H0	2.12833e-08	2.2593e-07	0.00716792	-139.51	H81 down vs H0	0.0108564	0.0527529	0.167533	-5.96899	H312 down vs H0	45.6103	503.094	57.3574	1
D-Glutamate	147.053	10.3619	C5H9NO4	Amino Acid Metabolism	Glutamate metabolism__D-Glutamine and D	D-Glutamate	1.41788e-07	9.88223e-07	0.0101071	0.0340695	2.41379	2.41379	H36 up vs H0	0.00716321	0.0186514	2.63351	2.63351	H42 up vs H0	4.44561e-05	0.000125203	5.07155	5.07155	H57 up vs H0	5.31096e-08	4.75917e-07	10.9576	10.9576	H81 up vs H0	0.936175	1	0.973531	-1.02719	H312 down vs H0	17.414	49.8676	14.8909	1
Acetone cyanohydrin	85.0528	10.3726	C4H7NO	0	linamarin degradation __ superpathway o	D-Glutamate	0.00629307	0.00923877	0.664071	0.781927	0.768189	-1.30176	H36 down vs H0	0.418105	0.515165	1.67515	1.67515	H42 up vs H0	0.100674	0.12653	2.90723	2.90723	H57 up vs H0	0.0037383	0.00586234	6.76697	6.76697	H81 up vs H0	0.776296	0.959936	0.835248	-1.19725	H312 down vs H0	4.19382	42.8957	53.1873	1
5-Hydroxytryptophol	177.079	10.3741	C10H11NO2	0	0	5-Hydroxytryptophol	0.00141182	0.0023935	0.0119151	0.0387804	0.358058	-2.79285	H36 down vs H0	0.000684217	0.00260834	0.216818	-4.61216	H42 down vs H0	0.000135965	0.000333865	0.169744	-5.89123	H57 down vs H0	0.000218273	0.000445588	0.19599	-5.10229	H81 down vs H0	0.0148848	0.0662615	0.355339	-2.81422	H312 down vs H0	5.48492	22.4572	21.2906	1
Ser-Tyr	268.106	10.3916	C12H16N2O5	Peptide(di-)	Hydrophobic peptide	Ser-Tyr	0.000117301	0.000247516	3.13558e-05	0.000470337	32.8634	32.8634	H36 up vs H0	2.4572e-05	0.000206764	41.0488	41.0488	H42 up vs H0	1.89094e-05	5.95777e-05	44.1221	44.1221	H57 up vs H0	0.000174162	0.000363056	20.925	20.925	H81 up vs H0	0.00305383	0.0195286	10.7032	10.7032	H312 up vs H0	7.95452	108.996	71.2523	1
Ala-Leu-Asp-Tyr	480.222	10.3942	C22H32N4O8	Peptide(tetra-)	Hydrophobic peptide	Leu-Lys-Val	1.49742e-08	1.6592e-07	0.0898824	0.18617	4.32985	4.32985	H36 up vs H0	5.88688e-06	6.65893e-05	137.163	137.163	H42 up vs H0	4.03142e-08	7.12011e-07	771.788	771.788	H57 up vs H0	3.72541e-07	2.14211e-06	273.016	273.016	H81 up vs H0	0.338417	0.626025	2.33357	2.33357	H312 up vs H0	21.8175	428.546	102.14	1
hydrogen iodide	127.912	10.4304	HI	0	0	hydrogen iodide	0.013561	0.0187893	0.0381818	0.0947677	0.301324	-3.31869	H36 down vs H0	0.0154108	0.0350938	0.225898	-4.42678	H42 down vs H0	0.461936	0.504329	0.651559	-1.53478	H57 down vs H0	0.458732	0.511349	0.661582	-1.51153	H81 down vs H0	0.00188891	0.0141668	0.137572	-7.26891	H312 down vs H0	3.57702	30.63	44.5275	1
Gln-Pro-Ser	330.154	10.4537	C13H22N4O6	Peptide(tri-)	Polar peptide	D-Glutamate	1.53897e-08	1.6592e-07	1	1	1	1	No change between H36 and H0	0.404489	0.503785	1.97698	1.97698	H42 up vs H0	4.04243e-06	1.76536e-05	106.854	106.854	H57 up vs H0	2.06543e-07	1.33191e-06	215.928	215.928	H81 up vs H0	1	1	1	1	No change between H312 and H0	21.7593	366.196	87.513	1
Ethyladipicacid	174.089	10.4672	C8H14O4	0	0	Suberic acid	0.0552986	0.0677726	0.0426252	0.104667	0.705738	-1.41696	H36 down vs H0	0.0885582	0.153531	0.739261	-1.3527	H42 down vs H0	0.00465508	0.00791134	0.589415	-1.6966	H57 down vs H0	0.0133672	0.0190565	0.64793	-1.54338	H81 down vs H0	0.324976	0.610991	0.842571	-1.18684	H312 down vs H0	2.51278	1.90581	3.94393	1
Lotaustralin	261.121	10.4776	C11H19NO6	0	lotaustralin biosynthesis __ superpathw	Lotaustralin	0.00835713	0.0119635	0.690756	0.797026	0.736433	-1.3579	H36 down vs H0	0.411771	0.510094	0.515511	-1.93982	H42 down vs H0	0.00207616	0.00394642	0.0660952	-15.1297	H57 down vs H0	0.0183676	0.0256552	0.147552	-6.77728	H81 down vs H0	0.786643	0.966992	0.804748	-1.24263	H312 down vs H0	3.96258	65.0432	85.3547	1
2-O-Methylcytosine	125.059	10.4791	C5H7N3O	0	0	5-Methylcytosine	0.000563354	0.00104213	0.000127882	0.001177	0.0392643	-25.4684	H36 down vs H0	0.00107631	0.00374701	0.0628149	-15.9198	H42 down vs H0	0.219484	0.260661	0.387986	-2.57741	H57 down vs H0	0.454345	0.50812	0.57856	-1.72843	H81 down vs H0	0.134401	0.337664	0.312657	-3.1984	H312 down vs H0	6.34634	93.487	76.6004	1
Monodehydroascorbate	175.024	10.4908	C6H7O6	Carbohydrate Metabolism	Ascorbate and aldarate metabolism	[FA hydroxy,oxo(7:0/2:0)] 4-hydroxy-2-o	0.0594146	0.072064	0.133651	0.246575	0.32302	-3.09579	H36 down vs H0	0.217337	0.311126	0.381429	-2.62172	H42 down vs H0	0.621916	0.658163	0.683538	-1.46298	H57 down vs H0	0.999258	1	0.999315	-1.00069	H81 down vs H0	0.0088332	0.0458264	0.115529	-8.65585	H312 down vs H0	2.46019	37.1986	78.6249	1
[FA hydroxy,oxo(7:0/2:0)] 4-hydroxy-2-oxo-Heptanedioic acid	190.048	10.4917	C7H10O6	Amino Acid Metabolism	Tyrosine metabolism	[FA hydroxy,oxo(7:0/2:0)] 4-hydroxy-2-o	0.0215587	0.0287172	0.0201811	0.0573042	0.307051	-3.25679	H36 down vs H0	0.0555685	0.103909	0.368319	-2.71504	H42 down vs H0	0.390917	0.432958	0.647381	-1.54468	H57 down vs H0	0.999732	1	0.999838	-1.00016	H81 down vs H0	0.00926135	0.0473358	0.246364	-4.05903	H312 down vs H0	3.21769	20.7913	33.6001	1
Ala-His	226.107	10.5166	C9H14N4O3	Peptide(di-)	Basic peptide	Carnosine	1.61091e-06	7.1252e-06	0.000179243	0.00141582	74.865	74.865	H36 up vs H0	4.88536e-05	0.000340495	150.836	150.836	H42 up vs H0	9.30541e-08	1.21146e-06	1886.66	1886.66	H57 up vs H0	2.65503e-07	1.65043e-06	897.951	897.951	H81 up vs H0	0.000207948	0.00305285	85.5673	85.5673	H312 up vs H0	13.4293	372.478	144.229	1
2-Hydroxyethanesulfonate	125.999	10.5294	C2H6O4S	Amino Acid Metabolism	Taurine and hypotaurine metabolism	2-Hydroxyethanesulfonate	0.0594267	0.072064	0.707585	0.815081	0.87562	-1.14205	H36 down vs H0	0.785385	0.833717	0.904253	-1.10589	H42 down vs H0	0.166343	0.20101	1.68354	1.68354	H57 up vs H0	0.0434777	0.0571421	2.10302	2.10302	H81 up vs H0	0.712114	0.93748	0.872429	-1.14622	H312 down vs H0	2.46004	8.56439	18.1033	1
D-Alanyl-D-alanine	160.085	10.5311	C6H12N2O3	Amino Acid Metabolism	D-Alanine metabolism__Peptidoglycan bio	D-Alanyl-D-alanine	0.00242246	0.0038853	0.0338378	0.0867958	10.9584	10.9584	H36 up vs H0	0.0029785	0.00878277	38.751	38.751	H42 up vs H0	0.00156757	0.00303745	51.4828	51.4828	H57 up vs H0	0.000899661	0.00161238	54.8706	54.8706	H81 up vs H0	0.527519	0.805283	2.04377	2.04377	H312 up vs H0	5.00363	162.186	168.551	1
N3-(4-methoxyfumaroyl)-L-2,3-diaminopropanoate	216.075	10.5493	C8H12N2O5	0	0	L-Leucine	1.35913e-05	3.95695e-05	0.444077	0.573808	1.33325	1.33325	H36 up vs H0	0.0134059	0.0311449	2.78905	2.78905	H42 up vs H0	4.24928e-05	0.000122167	6.67495	6.67495	H57 up vs H0	9.26731e-06	2.75623e-05	7.62765	7.62765	H81 up vs H0	0.188034	0.425388	1.6864	1.6864	H312 up vs H0	10.4876	40.7696	20.2146	1
L-3-Amino-isobutanoate	103.063	10.5521	C4H9NO2	Amino Acid Metabolism	Valine, leucine and isoleucine degradat	Arg-Thr-Ser-Tyr	5.96155e-09	8.27917e-08	0.000187876	0.00145656	4.68614	4.68614	H36 up vs H0	9.1732e-05	0.000591543	5.5521	5.5521	H42 up vs H0	2.32417e-06	1.17917e-05	9.34324	9.34324	H57 up vs H0	2.96436e-09	5.52812e-08	22.6226	22.6226	H81 up vs H0	0.983811	1	1.00763	1.00763	H312 up vs H0	23.8517	85.441	18.6273	1
8-Hydroxy-7-methylguanine	181.06	10.5559	C6H7N5O2	0	0	8-Hydroxy-7-methylguanine	0.00128976	0.00221377	0.139797	0.252572	0.307488	-3.25216	H36 down vs H0	0.0504929	0.0959783	0.190429	-5.25129	H42 down vs H0	8.30967e-05	0.000220526	0.0231395	-43.2162	H57 down vs H0	0.00165098	0.00276499	0.0659943	-15.1528	H81 down vs H0	0.193874	0.429379	0.340088	-2.94042	H312 down vs H0	5.56728	94.7279	88.4786	1
D-Glutamine	146.069	10.5732	C5H10N2O3	Amino Acid Metabolism	D-Glutamine and D-glutamate metabolism	Arg-Thr-Ser-Tyr	0.000848093	0.00150433	0.231846	0.369455	2.59368	2.59368	H36 up vs H0	0.024644	0.0516851	6.95552	6.95552	H42 up vs H0	0.00527083	0.00889211	11.8966	11.8966	H57 up vs H0	0.000111811	0.000243374	34.402	34.402	H81 up vs H0	0.609765	0.865716	1.52213	1.52213	H312 up vs H0	5.95593	102.455	89.4515	1
L-Leucine	131.095	10.5986	C6H13NO2	Amino Acid Metabolism	Valine, leucine and isoleucine degradat	L-Leucine	8.89547e-05	0.000194237	0.0227345	0.0619779	2.56591	2.56591	H36 up vs H0	0.00335649	0.00977206	3.71442	3.71442	H42 up vs H0	3.747e-05	0.00010909	7.50418	7.50418	H57 up vs H0	7.93191e-06	2.46532e-05	8.66706	8.66706	H81 up vs H0	0.0443568	0.147145	2.36038	2.36038	H312 up vs H0	8.25751	35.4907	22.3495	1
His-Gly-Ser-Ser	193.077	10.6025	C14H22N6O7	Peptide(tetra-)	Basic peptide	His-Gly-Ser-Ser	0.503078	0.51887	0.154042	0.271563	0.169658	-5.89422	H36 down vs H0	0.417262	0.515046	0.353361	-2.82997	H42 down vs H0	0.074421	0.0974393	0.0957816	-10.4404	H57 down vs H0	0.148762	0.181996	0.165635	-6.03736	H81 down vs H0	0.143274	0.355056	0.148861	-6.71766	H312 down vs H0	0.88833	36.8078	215.461	1
Stachydrine	143.094	10.6268	C7H13NO2	0	stachydrine degradation	3-Butynoate	3.55137e-05	8.84636e-05	0.000512358	0.00318514	0.230336	-4.34148	H36 down vs H0	3.92656e-05	0.000285192	0.147924	-6.76021	H42 down vs H0	5.66488e-06	2.2594e-05	0.111215	-8.99159	H57 down vs H0	2.85044e-06	1.05177e-05	0.110712	-9.03248	H81 down vs H0	0.00102714	0.00892851	0.239406	-4.17701	H312 down vs H0	9.30865	36.2294	20.2385	1
(R)-1-Aminopropan-2-ol	75.0684	10.6302	C3H9NO	Amino Acid Metabolism	Glycine, serine and threonine metabolis	(R)-1-Aminopropan-2-ol	0.0248038	0.0325373	0.134618	0.247039	5.5644	5.5644	H36 up vs H0	0.977894	0.991975	1.03301	1.03301	H42 up vs H0	0.136093	0.167986	0.167687	-5.96349	H57 down vs H0	0.109508	0.136391	6.30852	6.30852	H81 up vs H0	0.644261	0.892651	0.581377	-1.72005	H312 down vs H0	3.11076	109.074	182.33	1
meso-2,6-Diaminoheptanedioate	190.095	10.6373	C7H14N2O4	Amino Acid Metabolism	Lysine biosynthesis	meso-2,6-Diaminoheptanedioate	4.59037e-06	1.59967e-05	0.7746	0.870479	0.823641	-1.21412	H36 down vs H0	0.721816	0.786989	1.28667	1.28667	H42 up vs H0	0.0328681	0.0457238	4.84705	4.84705	H57 up vs H0	7.55097e-05	0.000172522	23.2656	23.2656	H81 up vs H0	0.0353266	0.123108	0.211207	-4.7347	H312 down vs H0	11.9259	152.179	66.3541	1
allopurinol	136.038	10.6392	C5H4N4O	0	0	allopurinol	2.81068e-06	1.12102e-05	0.637571	0.757185	1.20786	1.20786	H36 up vs H0	0.121278	0.198299	1.94025	1.94025	H42 up vs H0	1.00314e-05	3.56181e-05	9.57528	9.57528	H57 up vs H0	2.03952e-05	5.39183e-05	7.81428	7.81428	H81 up vs H0	0.61696	0.870265	1.23303	1.23303	H312 up vs H0	12.6153	56.1985	23.1648	1
[FA dioxo(8:0)] 4,7-dioxo-octanoic acid	172.074	10.6448	C8H12O4	Lipids: Fatty Acyls	Fatty Acids and Conjugates	[FA dioxo(8:0)] 4,7-dioxo-octanoic acid	0.00449014	0.00673521	0.00269433	0.0116193	0.489581	-2.04256	H36 down vs H0	0.0254521	0.0528975	0.586717	-1.7044	H42 down vs H0	0.000326351	0.000726393	0.394315	-2.53604	H57 down vs H0	0.0010187	0.00179771	0.45084	-2.21808	H81 down vs H0	0.0749564	0.221974	0.65886	-1.51777	H312 down vs H0	4.47444	5.8891	6.84406	1
Phe-Asp	280.106	10.6489	C13H16N2O5	Peptide(di-)	Hydrophobic peptide	L-Leucine	5.32188e-05	0.000126624	0.080168	0.171789	2.32153	2.32153	H36 up vs H0	0.019643	0.0433024	3.32462	3.32462	H42 up vs H0	3.65821e-05	0.000106956	11.0243	11.0243	H57 up vs H0	8.02888e-06	2.47318e-05	12.9982	12.9982	H81 up vs H0	0.0505454	0.164511	2.69272	2.69272	H312 up vs H0	8.8368	53.6636	31.5782	1
N-Acetyl-D-fucosamine	205.095	10.6515	C8H15NO5	0	0	(S)-Dihydroorotate	4.26324e-06	1.5321e-05	0.00011026	0.00109388	0.201987	-4.9508	H36 down vs H0	3.11666e-06	4.57552e-05	0.114227	-8.75453	H42 down vs H0	1.10903e-06	6.82695e-06	0.0985377	-10.1484	H57 down vs H0	1.35609e-06	5.85635e-06	0.111809	-8.94381	H81 down vs H0	0.00546692	0.0314348	0.328674	-3.04252	H312 down vs H0	12.0281	42.1914	18.2401	1
N-Acetyl-beta-D-glucosaminylamine	220.106	10.6529	C8H16N2O5	0	0	L-Leucine	0.00114131	0.00197866	0.188049	0.310986	0.46426	-2.15396	H36 down vs H0	0.643461	0.718697	0.757582	-1.31999	H42 down vs H0	0.0425769	0.0580594	3.54014	3.54014	H57 up vs H0	0.006685	0.0101155	5.32735	5.32735	H81 up vs H0	0.307404	0.594143	1.85371	1.85371	H312 up vs H0	5.67947	51.928	47.5442	1
DL-2-Aminooctanoicacid	159.126	10.6597	C8H17NO2	0	0	(S)-Dihydroorotate	0.00313506	0.0048502	0.0363209	0.0917469	0.180904	-5.52778	H36 down vs H0	0.00616409	0.0163021	0.0896629	-11.1529	H42 down vs H0	0.000176583	0.0004216	0.0291122	-34.3499	H57 down vs H0	0.0022859	0.00371998	0.0728223	-13.7321	H81 down vs H0	0.177932	0.410612	0.326204	-3.06556	H312 down vs H0	4.77987	81.399	88.5535	1
(S)-Carnitine	161.105	10.6598	C7H15NO3	0	gamma-butyrobetaine degradation __ carn	(S)-Dihydroorotate	0.00311648	0.00484136	0.0370231	0.0928943	0.192948	-5.18275	H36 down vs H0	0.00792323	0.0201735	0.105534	-9.47562	H42 down vs H0	0.000154376	0.000372447	0.0315232	-31.7227	H57 down vs H0	0.00226477	0.0036943	0.0793403	-12.6039	H81 down vs H0	0.164195	0.38953	0.326593	-3.06191	H312 down vs H0	4.78499	76.0745	82.6726	1
O-Acetylcarnitine	203.116	10.6676	C9H17NO4	Amino Acid Metabolism	Alanine and aspartate metabolism	(S)-Dihydroorotate	0.00142939	0.00241735	0.0229049	0.0619779	0.164977	-6.06147	H36 down vs H0	0.00352455	0.0102182	0.0822925	-12.1518	H42 down vs H0	6.48979e-05	0.000177697	0.0247848	-40.3473	H57 down vs H0	0.00146321	0.00247455	0.0705547	-14.1734	H81 down vs H0	0.128316	0.327919	0.294469	-3.39595	H312 down vs H0	5.47369	86.2667	81.9533	1
3-Butynoate	84.0211	10.67	C4H4O2	Carbohydrate Metabolism	Butanoate metabolism	3-Butynoate	6.81346e-05	0.000153955	0.001402	0.00695959	0.243033	-4.11467	H36 down vs H0	7.11354e-05	0.000471956	0.142401	-7.0224	H42 down vs H0	1.12081e-05	3.84757e-05	0.106566	-9.38385	H57 down vs H0	1.45234e-05	4.05716e-05	0.121895	-8.20376	H81 down vs H0	0.0183863	0.0787986	0.35353	-2.82861	H312 down vs H0	8.55545	38.0216	23.1095	1
Asn-Leu-Tyr-Tyr	571.265	10.6802	C28H37N5O8	Peptide(tetra-)	Hydrophobic peptide	Asn-Leu-Tyr-Tyr	8.31996e-09	1.08728e-07	1	1	1	1	No change between H36 and H0	0.151645	0.232522	4.3137	4.3137	H42 up vs H0	4.07234e-06	1.76724e-05	312.646	312.646	H57 up vs H0	6.51424e-08	5.54917e-07	1165.27	1165.27	H81 up vs H0	1	1	1	1	No change between H312 and H0	23.0989	588.532	132.49	1
Inosine	268.081	10.6843	C10H12N4O5	Nucleotide Metabolism	Purine metabolism		1.34503e-05	3.9325e-05	0.975155	1	0.986841	-1.01333	H36 down vs H0	0.281621	0.381017	1.62218	1.62218	H42 up vs H0	0.000113443	0.000283606	7.36823	7.36823	H57 up vs H0	0.000171178	0.000359005	6.33706	6.33706	H81 up vs H0	0.783417	0.966992	0.884974	-1.12998	H312 down vs H0	10.5008	52.8881	26.1902	1
Asn-Tyr	295.117	10.6858	C13H17N3O5	Peptide(di-)	Hydrophobic peptide	Asn-Tyr	1.00743e-05	3.15965e-05	0.00082333	0.00467757	40.7611	40.7611	H36 up vs H0	0.000161257	0.000927226	91.0437	91.0437	H42 up vs H0	1.47323e-06	8.05932e-06	571.568	571.568	H57 up vs H0	1.38758e-05	3.892e-05	187.013	187.013	H81 up vs H0	0.127529	0.327119	5.01243	5.01243	H312 up vs H0	10.8727	296.59	141.848	1
N-Formimino-L-glutamate	174.064	10.6887	C6H10N2O4	Amino Acid Metabolism	Histidine metabolism	N-Formimino-L-glutamate	0.00134649	0.0022997	0.0152928	0.0459274	4.09405	4.09405	H36 up vs H0	0.00203487	0.00632458	6.98513	6.98513	H42 up vs H0	0.00953247	0.0152608	4.88918	4.88918	H57 up vs H0	0.71033	0.754043	1.22611	1.22611	H81 up vs H0	0.723013	0.937751	0.81615	-1.22526	H312 down vs H0	5.52801	46.2382	43.4946	1
Ala-Pro	186.1	10.6954	C8H14N2O3	Peptide(di-)	Nonpolar peptide	meso-2,6-Diaminoheptanedioate	9.5575e-06	3.02508e-05	0.407582	0.542269	0.694849	-1.43916	H36 down vs H0	0.185559	0.274755	1.84828	1.84828	H42 up vs H0	0.000922329	0.00188845	5.41141	5.41141	H57 up vs H0	9.41452e-05	0.000208206	7.34248	7.34248	H81 up vs H0	0.702805	0.936169	0.84008	-1.19036	H312 down vs H0	10.9413	58.084	27.6051	1
(S)-Dihydroorotate	158.033	10.7068	C5H6N2O4	Nucleotide Metabolism	Pyrimidine metabolism	(S)-Dihydroorotate	3.16848e-08	3.07923e-07	0.165256	0.283649	0.158268	-6.31841	H36 down vs H0	0.00450193	0.0127309	0.0150917	-66.2618	H42 down vs H0	3.20973e-07	2.95296e-06	0.000103728	-9640.62	H57 down vs H0	1.88696e-08	2.03438e-07	3.38503e-05	-29541.9	H81 down vs H0	0.0300333	0.112016	0.0452597	-22.0947	H312 down vs H0	20.2647	958.812	246.035	1
2-methylbutyronitrile	83.0735	10.7237	C5H9N	0	lotaustralin biosynthesis __ superpathw	Piperideine	0.002054	0.0033505	0.000156464	0.00130072	0.490528	-2.03862	H36 down vs H0	0.00178713	0.00572802	0.55655	-1.79678	H42 down vs H0	0.0307489	0.0431235	0.680622	-1.46924	H57 down vs H0	0.00259025	0.00417588	0.584308	-1.71143	H81 down vs H0	0.000324908	0.00401939	0.498019	-2.00795	H312 down vs H0	5.14884	3.79965	3.8374	1
Urea-1-carboxylate	104.022	10.7547	C2H4N2O3	Amino Acid Metabolism	Arginine and proline metabolism__Atrazi	Urea-1-carboxylate	0.254064	0.274772	0.4612	0.584978	0.881346	-1.13463	H36 down vs H0	0.445272	0.538069	0.872223	-1.1465	H42 down vs H0	0.627454	0.663007	0.917022	-1.09049	H57 down vs H0	0.10464	0.131515	0.752802	-1.32837	H81 down vs H0	0.0302583	0.112248	0.667487	-1.49816	H312 down vs H0	1.40848	1.13997	4.20869	1
Glu-Leu	260.137	10.7646	C11H20N2O5	Peptide(di-)	Hydrophobic peptide	Glu-Leu	1.18824e-05	3.57213e-05	0.000109478	0.00109388	10.8888	10.8888	H36 up vs H0	5.51454e-06	6.58689e-05	22.5621	22.5621	H42 up vs H0	3.35027e-07	3.04169e-06	41.1417	41.1417	H57 up vs H0	8.53767e-05	0.000192516	11.4402	11.4402	H81 up vs H0	0.000370323	0.00420226	9.39368	9.39368	H312 up vs H0	10.6593	83.2178	40.5967	1
2-Hydroxy-3-oxoadipate	176.032	10.7847	C6H8O6	Carbohydrate Metabolism	Glyoxylate and dicarboxylate metabolism	4-Hydroxy-2-oxoglutarate	0.000167055	0.000340024	0.418412	0.554134	0.378924	-2.63905	H36 down vs H0	0.0507383	0.0961797	0.0800525	-12.4918	H42 down vs H0	0.00211561	0.00400994	0.0148935	-67.1436	H57 down vs H0	5.33316e-05	0.000126893	0.00336437	-297.233	H81 down vs H0	0.789718	0.966992	0.717392	-1.39394	H312 down vs H0	7.57605	299.504	205.572	1
Arg-Met-Cys-Arg	282.131	10.793	C20H40N10O5S2	Peptide(tetra-)	Basic peptide	Arg-Met-Cys-Arg	0.00492974	0.00733086	0.00122126	0.00628859	1.60019	1.60019	H36 up vs H0	0.0127644	0.0302661	1.43607	1.43607	H42 up vs H0	0.00568254	0.00949383	1.50365	1.50365	H57 up vs H0	0.000147817	0.000311907	1.77725	1.77725	H81 up vs H0	0.00674029	0.0366205	1.48938	1.48938	H312 up vs H0	4.39619	2.09423	2.47715	1
4-Hydroxy-2-oxoglutarate	162.016	10.8059	C5H6O6	Carbohydrate Metabolism	Glyoxylate and dicarboxylate metabolism	4-Hydroxy-2-oxoglutarate	0.0122898	0.0171659	0.283674	0.420032	0.411001	-2.43309	H36 down vs H0	0.00510232	0.0140263	0.0746651	-13.3931	H42 down vs H0	0.0102454	0.0161401	0.0955057	-10.4706	H57 down vs H0	0.0221498	0.0305057	0.138585	-7.21578	H81 down vs H0	0.877402	1	0.876199	-1.14129	H312 down vs H0	3.65452	68.4269	97.3642	1
Maleamate	115.027	10.8227	C4H5NO3	Metabolism of Cofactors and Vitamins	Nicotinate and nicotinamide metabolism	Maleamate	9.04684e-06	2.90341e-05	0.000556078	0.00336574	0.168068	-5.94998	H36 down vs H0	1.31252e-05	0.000125783	0.0791088	-12.6408	H42 down vs H0	1.0201e-06	6.75697e-06	0.0495784	-20.1701	H57 down vs H0	2.21572e-06	8.58902e-06	0.0646393	-15.4705	H81 down vs H0	1.78133e-05	0.000502722	0.0835855	-11.9638	H312 down vs H0	11.0132	64.2569	30.3396	1
Asp-Asp-Pro-Tyr	508.181	10.8318	C22H28N4O10	Peptide(tetra-)	Hydrophobic peptide		1.29246e-07	9.38736e-07	0.0341151	0.087183	9.76223	9.76223	H36 up vs H0	0.00496149	0.0136937	26.2284	26.2284	H42 up vs H0	8.51467e-07	5.77608e-06	921.625	921.625	H57 up vs H0	4.96875e-07	2.76487e-06	856.408	856.408	H81 up vs H0	1	1	1	1	No change between H312 and H0	17.5809	517.917	153.187	1
Ala-Leu-Ala-Asp	388.196	10.882	C16H28N4O7	Peptide(tetra-)	Hydrophobic peptide	Asp-Leu-Gln-Pro	5.5614e-06	1.87189e-05	0.0124613	0.0393459	11.4516	11.4516	H36 up vs H0	0.000104694	0.000650798	76.2554	76.2554	H42 up vs H0	1.08949e-06	6.81573e-06	400.376	400.376	H57 up vs H0	1.09739e-06	4.94903e-06	309.425	309.425	H81 up vs H0	0.000430301	0.00463918	45.7862	45.7862	H312 up vs H0	11.663	272.965	121.703	1
Leu-Ala-Asp	317.159	10.8879	C13H23N3O6	Peptide(tri-)	Hydrophobic peptide	Ala-Lys-Met-Pro	1.58678e-08	1.68443e-07	0.237729	0.373651	3.37061	3.37061	H36 up vs H0	0.00471548	0.0131237	25.6839	25.6839	H42 up vs H0	4.02124e-07	3.35338e-06	1151.91	1151.91	H57 up vs H0	1.14146e-07	9.02265e-07	1423.18	1423.18	H81 up vs H0	1	1	1	1	No change between H312 and H0	21.6942	622.462	149.201	1
Aminoacetone	73.0528	10.8904	C3H7NO	Amino Acid Metabolism	Glycine, serine and threonine metabolis	Aminoacetone	0.050486	0.0624289	0.0121854	0.0393459	0.511617	-1.95459	H36 down vs H0	0.00253161	0.0076952	0.419777	-2.38222	H42 down vs H0	0.0196808	0.0287707	0.524271	-1.90741	H57 down vs H0	0.0191168	0.0266476	0.537162	-1.86163	H81 down vs H0	0.0307346	0.112802	0.552382	-1.81034	H312 down vs H0	2.57967	4.52927	9.12993	1
Asp-Leu-Gln-Pro	471.233	10.8938	C20H33N5O8	Peptide(tetra-)	Hydrophobic peptide	Asp-Leu-Gln-Pro	8.92228e-07	4.36622e-06	0.000826931	0.00467757	95.5975	95.5975	H36 up vs H0	0.000323468	0.00146838	184.424	184.424	H42 up vs H0	7.38953e-07	5.17711e-06	3473.24	3473.24	H57 up vs H0	2.28922e-05	6.00595e-05	496.255	496.255	H81 up vs H0	1	1	1	1	No change between H312 and H0	14.3316	591.892	214.759	1
D-Glucosamine	179.079	10.8987	C6H13NO5	Carbohydrate Metabolism	Aminosugars metabolism	D-Glucosamine	0.0278101	0.0363274	0.0786948	0.170687	0.364784	-2.74135	H36 down vs H0	0.015762	0.0356583	0.22613	-4.42224	H42 down vs H0	0.00538189	0.00905733	0.174192	-5.7408	H57 down vs H0	0.00985406	0.0144359	0.215575	-4.63875	H81 down vs H0	0.508074	0.794946	0.679631	-1.47139	H312 down vs H0	3.02407	26.0563	44.8046	1
validamine	177.1	10.9051	C7H15NO4	0	0	D-Glucosamine	0.0113391	0.0159999	0.255095	0.391146	0.286617	-3.48897	H36 down vs H0	0.105201	0.177913	0.152186	-6.5709	H42 down vs H0	0.00309901	0.00558308	0.0258141	-38.7385	H57 down vs H0	0.00625309	0.00952457	0.0409871	-24.3979	H81 down vs H0	0.807424	0.978493	0.758681	-1.31808	H312 down vs H0	3.71826	121.679	170.169	1
Betaine	117.079	10.9096	C5H11NO2	Amino Acid Metabolism	Glycine, serine and threonine metabolis	Betaine	0.0152389	0.0209877	0.0251403	0.0664628	0.244776	-4.08536	H36 down vs H0	0.00448286	0.0127291	0.145907	-6.8537	H42 down vs H0	0.00226302	0.00423166	0.123112	-8.12268	H57 down vs H0	0.00355178	0.00560807	0.149763	-6.6772	H81 down vs H0	0.18973	0.426429	0.434729	-2.30028	H312 down vs H0	3.48573	34.7052	51.7732	1
2-Hydroxy-3-(4-hydroxyphenyl)propenoate	180.042	10.9164	C9H8O4	Amino Acid Metabolism	Tyrosine metabolism	2-Hydroxy-3-(4-hydroxyphenyl)propenoate	0.0730683	0.0861597	0.078912	0.170687	0.366847	-2.72593	H36 down vs H0	0.216215	0.310162	0.483891	-2.06658	H42 down vs H0	0.0047087	0.00798281	0.170254	-5.87358	H57 down vs H0	0.0305543	0.0413382	0.285294	-3.50515	H81 down vs H0	0.357803	0.653133	0.585	-1.7094	H312 down vs H0	2.30937	19.7066	44.3732	1
Propanoyl phosphate	154.003	10.9283	C3H7O5P	Carbohydrate Metabolism	Propanoate metabolism__C5-Branched diba	Propanoyl phosphate	1.14049e-06	5.35331e-06	0.106044	0.207549	0.179192	-5.58061	H36 down vs H0	0.00596206	0.0160071	0.0402868	-24.822	H42 down vs H0	2.67584e-06	1.28217e-05	0.00166112	-602.002	H57 down vs H0	7.3278e-07	3.63621e-06	0.00129679	-771.136	H81 down vs H0	0.167772	0.395095	0.218304	-4.58078	H312 down vs H0	13.9518	417.511	155.612	1
Ala-Lys-Met-Pro	445.236	10.936	C19H35N5O5S	Peptide(tetra-)	Basic peptide	Ala-Lys-Met-Pro	0.000864566	0.00152962	0.245698	0.380969	5.06368	5.06368	H36 up vs H0	0.069733	0.124976	14.8555	14.8555	H42 up vs H0	0.00105936	0.00214987	191.616	191.616	H57 up vs H0	0.000549185	0.00103818	216.727	216.727	H81 up vs H0	0.914083	1	1.16814	1.16814	H312 up vs H0	5.93784	314.362	275.299	1
D-2-Amino-hexano-6-lactam	128.095	10.9558	C6H12N2O	0	0	L-Lysine 1,6-lactam	2.41202e-06	9.78996e-06	2.7192e-05	0.0004535	4.68423	4.68423	H36 up vs H0	1.31868e-06	2.39445e-05	7.2577	7.2577	H42 up vs H0	1.41563e-06	7.94132e-06	7.19405	7.19405	H57 up vs H0	1.0647e-06	4.86517e-06	6.84262	6.84262	H81 up vs H0	0.00901017	0.0463956	2.45013	2.45013	H312 up vs H0	12.8356	33.6585	13.6358	1
4-Hydroxyphenylethanol	138.068	10.9561	C8H10O2	Amino Acid Metabolism	Tyrosine metabolism	4-Hydroxyphenylethanol	3.08096e-05	7.84452e-05	0.162693	0.280899	0.726524	-1.37642	H36 down vs H0	0.0282886	0.0582661	0.583084	-1.71502	H42 down vs H0	1.07906e-05	3.72276e-05	0.283229	-3.53071	H57 down vs H0	1.55013e-05	4.29555e-05	0.308171	-3.24495	H81 down vs H0	0.0191469	0.0815518	0.55983	-1.78626	H312 down vs H0	9.47778	13.2998	7.29695	1
Leu-Asp-Cys	349.131	10.9648	C13H23N3O6S	Peptide(tri-)	Hydrophobic peptide	Leu-Asp-Cys	0.282057	0.303618	0.121577	0.227958	0.101235	-9.878	H36 down vs H0	0.643703	0.718697	0.496854	-2.01267	H42 down vs H0	0.356161	0.397656	0.245585	-4.07191	H57 down vs H0	0.487495	0.539922	0.364985	-2.73984	H81 down vs H0	0.45788	0.755831	3.0843	3.0843	H312 up vs H0	1.3317	77.4013	302.236	1
citraconate	130.027	10.9653	C5H6O4	Amino Acid Metabolism	Valine, leucine and isoleucine biosynth	2,5-Dioxopentanoate	0.00280763	0.00440287	0.00148263	0.00725542	0.172946	-5.78214	H36 down vs H0	0.00365658	0.0105567	0.192497	-5.19489	H42 down vs H0	0.000329072	0.000730097	0.11851	-8.43813	H57 down vs H0	0.000820236	0.00147771	0.15433	-6.47961	H81 down vs H0	0.000332036	0.00401939	0.118719	-8.42324	H312 down vs H0	4.87512	33.7532	36.0025	1
Leu-Asp-Gln	374.18	10.9675	C15H26N4O7	Peptide(tri-)	Hydrophobic peptide	Leu-Asp-Gln	6.07935e-07	3.2021e-06	0.0012199	0.00628859	24.1028	24.1028	H36 up vs H0	3.28911e-06	4.7281e-05	219.743	219.743	H42 up vs H0	1.92107e-07	2.07062e-06	613.791	613.791	H57 up vs H0	1.55025e-07	1.12597e-06	504.037	504.037	H81 up vs H0	0.00242955	0.0169333	21.6562	21.6562	H312 up vs H0	14.9394	326.025	113.48	1
L-Methionine	149.051	11.0541	C5H11NO2S	Amino Acid Metabolism	Methionine metabolism	L-Methionine	8.4859e-08	6.88855e-07	0.0110796	0.0367546	2.71754	2.71754	H36 up vs H0	0.000282308	0.0013434	4.95628	4.95628	H42 up vs H0	5.73495e-07	4.30202e-06	12.2881	12.2881	H57 up vs H0	4.2745e-09	6.85908e-08	23.3237	23.3237	H81 up vs H0	4.80697e-05	0.00094766	6.40466	6.40466	H312 up vs H0	18.3541	69.5944	19.7171	1
Indole	117.058	11.0869	C8H7N	Amino Acid Metabolism	Tryptophan metabolism__Phenylalanine, t	Indole	5.47258e-05	0.000129762	0.0155327	0.0463965	3.33543	3.33543	H36 up vs H0	0.00262839	0.00785104	5.03352	5.03352	H42 up vs H0	4.41197e-05	0.000124765	10.7947	10.7947	H57 up vs H0	3.61533e-06	1.26628e-05	15.2071	15.2071	H81 up vs H0	0.0528735	0.17128	2.67912	2.67912	H312 up vs H0	8.80475	54.0695	31.9329	1
THTC	132.025	11.0967	C5H8O2S	0	0		1.02314e-05	3.19441e-05	0.018207	0.0525641	7.7559	7.7559	H36 up vs H0	0.0078526	0.0200677	11.535	11.535	H42 up vs H0	9.05535e-06	3.2777e-05	106.522	106.522	H57 up vs H0	1.35799e-06	5.85635e-06	158.436	158.436	H81 up vs H0	4.56162e-05	0.00092574	63.2179	63.2179	H312 up vs H0	10.8526	203.509	97.5112	1
Gln-Leu-Lys-Pro	484.301	11.0996	C22H40N6O6	Peptide(tetra-)	Basic peptide	L-Methionine	1.66811e-10	5.00433e-09	1	1	1	1	No change between H36 and H0	1	1	1	1	No change between H42 and H0	6.61165e-07	4.80381e-06	103.413	103.413	H57 up vs H0	3.51535e-09	6.06398e-08	377.345	377.345	H81 up vs H0	1	1	1	1	No change between H312 and H0	33.2617	438.722	68.5882	1
Phe-Arg	321.18	11.1229	C15H23N5O3	Peptide(di-)	Basic peptide	Phe-Arg	5.51329e-07	2.99541e-06	5.22455e-05	0.000655444	82.6826	82.6826	H36 up vs H0	3.52327e-06	4.76678e-05	268.451	268.451	H42 up vs H0	3.96561e-06	1.74285e-05	257.014	257.014	H57 up vs H0	0.000126502	0.000271673	60.8875	60.8875	H81 up vs H0	1	1	1	1	No change between H312 and H0	15.0971	357.604	123.172	1
O-Acetyl-L-homoserine	161.069	11.1443	C6H11NO4	Amino Acid Metabolism	Methionine metabolism__Sulfur metabolis	L-2-Aminoadipate	7.92361e-07	4.04985e-06	0.00278209	0.0118662	0.437004	-2.28831	H36 down vs H0	0.00027238	0.00130515	0.332585	-3.00675	H42 down vs H0	2.62215e-07	2.54829e-06	0.165042	-6.05905	H57 down vs H0	6.42287e-07	3.35741e-06	0.1949	-5.13085	H81 down vs H0	0.105594	0.288762	0.644814	-1.55083	H312 down vs H0	14.5178	25.8695	9.26598	1
Asp-Lys-Met-Trp	578.253	11.1769	C26H38N6O7S	Peptide(tetra-)	Basic peptide	Asp-Lys-Met-Trp	8.47286e-10	1.88589e-08	0.539683	0.6626	1.85467	1.85467	H36 up vs H0	0.00471691	0.0131237	24.7403	24.7403	H42 up vs H0	5.82611e-08	8.77747e-07	2402.02	2402.02	H57 up vs H0	1.51341e-08	1.71189e-07	3033.4	3033.4	H81 up vs H0	1	1	1	1	No change between H312 and H0	28.6649	803.672	145.792	1
N-Acetyl-L-citrulline	217.106	11.1808	C8H15N3O4	Amino Acid Metabolism	arginine biosynthesis III	Ala-Ala-Ser	7.47831e-08	6.37041e-07	1.69756e-06	7.32072e-05	128.568	128.568	H36 up vs H0	8.79092e-08	5.05478e-06	423.995	423.995	H42 up vs H0	9.95966e-09	2.8634e-07	904.894	904.894	H57 up vs H0	1.68013e-08	1.86982e-07	566.973	566.973	H81 up vs H0	6.68789e-07	4.61465e-05	215.8	215.8	H312 up vs H0	18.5913	329.621	92.1952	1
DL-Methionine sulfone	181.041	11.1811	C5H11NO4S	0	0	DL-Methionine sulfone	0.0346815	0.0439087	0.0168956	0.0493982	0.201316	-4.96732	H36 down vs H0	0.455173	0.544314	0.608245	-1.64407	H42 down vs H0	0.751652	0.777606	0.810799	-1.23335	H57 down vs H0	0.370268	0.422289	1.77261	1.77261	H81 up vs H0	0.513815	0.797127	0.647848	-1.54357	H312 down vs H0	2.85813	31.9772	58.1784	1
Asp-Leu-Gln-Gln	502.239	11.2002	C20H34N6O9	Peptide(tetra-)	Hydrophobic peptide	Asp-Leu-Gln-Gln	1.6403e-07	1.09884e-06	7.17307e-06	0.000188516	791.911	791.911	H36 up vs H0	2.1726e-06	3.56926e-05	1892.84	1892.84	H42 up vs H0	3.66434e-07	3.2005e-06	4539.05	4539.05	H57 up vs H0	7.29502e-06	2.28798e-05	785.827	785.827	H81 up vs H0	0.487146	0.774494	2.40941	2.40941	H312 up vs H0	17.1538	694.597	210.56	1
Ala-Asn	203.091	11.2059	C7H13N3O4	Peptide(di-)	Polar peptide	Ala-Asn	2.76313e-05	7.14203e-05	0.00032164	0.00219734	86.9156	86.9156	H36 up vs H0	0.000407865	0.00175892	95.7066	95.7066	H42 up vs H0	4.10235e-06	1.76914e-05	686.406	686.406	H57 up vs H0	5.77148e-06	1.89634e-05	451.201	451.201	H81 up vs H0	0.0336886	0.119729	12.4782	12.4782	H312 up vs H0	9.6086	316.733	171.41	1
Ala-Gly-His	283.128	11.222	C11H17N5O4	Peptide(tri-)	Basic peptide	Ala-Gly-His	3.22976e-05	8.16312e-05	0.000228801	0.00171601	38.5744	38.5744	H36 up vs H0	4.39559e-06	5.55155e-05	173.659	173.659	H42 up vs H0	4.28196e-06	1.8238e-05	175.23	175.23	H57 up vs H0	9.1639e-05	0.000205002	51.9035	51.9035	H81 up vs H0	2.47185e-05	0.000550186	96.3732	96.3732	H312 up vs H0	9.42144	195.402	107.849	1
D-Glucono-1,5-lactone	178.048	11.2454	C6H10O6	Carbohydrate Metabolism	Pentose phosphate pathway	D-Glucono-1,5-lactone	0.000690852	0.00124137	0.0466967	0.111878	3.73545	3.73545	H36 up vs H0	0.0589214	0.10929	3.67668	3.67668	H42 up vs H0	0.311695	0.353732	1.97391	1.97391	H57 up vs H0	0.06873	0.0878217	0.301718	-3.31435	H81 down vs H0	0.156286	0.37971	0.382038	-2.61754	H312 down vs H0	6.15023	69.5096	58.7702	1
myo-Inositol	180.063	11.2457	C6H12O6	Carbohydrate Metabolism	Inositol metabolism__Galactose metaboli	myo-Inositol	1.5681e-05	4.48959e-05	0.934488	0.981425	0.966179	-1.03501	H36 down vs H0	0.979036	0.991975	0.988578	-1.01155	H42 down vs H0	0.257754	0.300423	1.65035	1.65035	H57 up vs H0	1.68198e-05	4.56916e-05	8.86054	8.86054	H81 up vs H0	0.00301914	0.0195286	4.12173	4.12173	H312 up vs H0	10.3066	50.268	25.3618	1
3-Methyleneoxindole	145.053	11.2631	C9H7NO	0	0	Chrysene	2.16212e-05	5.86219e-05	0.00678265	0.0246317	3.62677	3.62677	H36 up vs H0	0.00106881	0.00374701	5.38643	5.38643	H42 up vs H0	1.32478e-05	4.48087e-05	11.5791	11.5791	H57 up vs H0	1.13392e-06	5.08057e-06	15.8076	15.8076	H81 up vs H0	0.0146932	0.0662615	3.30619	3.30619	H312 up vs H0	9.9072	53.9467	28.315	1
L-Erythrulose	120.042	11.2642	C4H8O4	Carbohydrate Metabolism	0	L-Azetidine 2-carboxylic acid	3.35582e-06	1.27226e-05	0.000426915	0.00277897	0.152676	-6.5498	H36 down vs H0	7.24089e-05	0.00047583	0.101152	-9.88613	H42 down vs H0	1.58754e-06	8.49148e-06	0.04968	-20.1288	H57 down vs H0	5.48154e-06	1.83605e-05	0.0705842	-14.1675	H81 down vs H0	0.254607	0.522853	0.567349	-1.76258	H312 down vs H0	12.3632	76.1356	32.0228	1
2-Naphthylamine	143.073	11.2664	C10H9N	0	0	Chrysene	5.54011e-05	0.000130914	0.00076655	0.00448237	30.7769	30.7769	H36 up vs H0	0.00013205	0.000781659	67.3868	67.3868	H42 up vs H0	1.4976e-05	4.94423e-05	146.324	146.324	H57 up vs H0	2.84689e-06	1.05177e-05	209.841	209.841	H81 up vs H0	0.00462566	0.0281777	18.3785	18.3785	H312 up vs H0	8.79069	201.869	119.413	1
L-Asparagine	132.053	11.2687	C4H8N2O3	Amino Acid Metabolism	Alanine and aspartate metabolism__Tetra	L-Tryptophan	1.06281e-08	1.30136e-07	2.65982e-05	0.0004535	9.9534	9.9534	H36 up vs H0	3.4739e-06	4.76678e-05	15.9121	15.9121	H42 up vs H0	1.78303e-08	3.96869e-07	43.451	43.451	H57 up vs H0	2.17825e-09	4.61538e-08	56.0841	56.0841	H81 up vs H0	0.0227293	0.0916775	3.13354	3.13354	H312 up vs H0	22.558	130.559	30.0961	1
L-Tryptophan	204.09	11.2706	C11H12N2O2	Amino Acid Metabolism	Tryptophan metabolism__Phenylalanine, t	L-Tryptophan	3.92766e-05	9.63552e-05	0.00840988	0.0294559	4.52899	4.52899	H36 up vs H0	0.00122993	0.00420125	7.43386	7.43386	H42 up vs H0	4.28109e-05	0.000122571	15.1113	15.1113	H57 up vs H0	1.39159e-06	5.96395e-06	26.9988	26.9988	H81 up vs H0	0.0167779	0.0725942	4.11277	4.11277	H312 up vs H0	9.18984	73.1801	41.4084	1
Met-Asp	264.078	11.2739	C9H16N2O5S	Peptide(di-)	Hydrophobic peptide	L-Tryptophan	2.35392e-13	4.07219e-11	1	1	1	1	No change between H36 and H0	1.82366e-06	3.14582e-05	49.2126	49.2126	H42 up vs H0	4.1171e-11	5.6816e-09	975.944	975.944	H57 up vs H0	1.62163e-12	3.72974e-10	2072.85	2072.85	H81 up vs H0	7.16423e-08	9.88664e-06	112.369	112.369	H312 up vs H0	58.9344	622.119	54.8919	1
D-Alanine	89.0477	11.2743	C3H7NO2	Amino Acid Metabolism	Alanine and aspartate metabolism__D-Ala	D-Alanine	8.3516e-09	1.08728e-07	3.3115e-05	0.000486156	8.69109	8.69109	H36 up vs H0	3.37082e-06	4.74667e-05	14.186	14.186	H42 up vs H0	1.30496e-08	3.35716e-07	39.1841	39.1841	H57 up vs H0	2.10366e-09	4.61538e-08	47.4125	47.4125	H81 up vs H0	0.0261799	0.101484	2.89755	2.89755	H312 up vs H0	23.0904	122.294	27.5408	1
2-(acetylamino)-1-5-anhydro-2-deoxy-3-O-b-D-galactopyranosyl-D-arabino-Hex-1-enitol	365.133	11.276	C14H23NO10	0	0	D-Glycerate	1.04818e-06	5.09326e-06	0.0963669	0.194995	0.674449	-1.48269	H36 down vs H0	0.00739102	0.0191004	0.500141	-1.99944	H42 down vs H0	5.22818e-07	4.13761e-06	0.206864	-4.83409	H57 down vs H0	3.07382e-06	1.11628e-05	0.259192	-3.85815	H81 down vs H0	0.170567	0.400311	0.714569	-1.39945	H312 down vs H0	14.0815	20.8314	7.69256	1
Indoleacrylicacid	187.063	11.2765	C11H9NO2	0	0	Chrysene	0.0298763	0.0386041	0.138248	0.252358	3.24048	3.24048	H36 up vs H0	0.0218368	0.0467932	7.09085	7.09085	H42 up vs H0	0.00787893	0.0127718	10.0912	10.0912	H57 up vs H0	0.00180407	0.00297801	14.4688	14.4688	H81 up vs H0	0.0391013	0.132254	5.72353	5.72353	H312 up vs H0	2.97002	49.8184	87.2235	1
3-Methylene-indolenine	129.058	11.2923	C9H7N	0	0	Chrysene	6.42267e-08	5.68159e-07	0.000420245	0.00276161	3.85486	3.85486	H36 up vs H0	3.42288e-05	0.000253955	5.70551	5.70551	H42 up vs H0	2.29261e-07	2.32632e-06	11.2434	11.2434	H57 up vs H0	2.20736e-09	4.61538e-08	19.6039	19.6039	H81 up vs H0	0.00194047	0.014397	3.32743	3.32743	H312 up vs H0	18.8799	59.7508	16.4569	1
2-Aminophenol	109.053	11.2954	C6H7NO	Amino Acid Metabolism	Tryptophan metabolism__Naphthalene and	2-Hydroxypyridine	3.46956e-07	2.04615e-06	0.00010567	0.00108825	0.362089	-2.76175	H36 down vs H0	5.99674e-06	6.67379e-05	0.268623	-3.7227	H42 down vs H0	1.40196e-07	1.64369e-06	0.190418	-5.2516	H57 down vs H0	3.05963e-07	1.85188e-06	0.219209	-4.56187	H81 down vs H0	0.0565103	0.179469	0.628882	-1.59012	H312 down vs H0	15.8606	22.2818	7.30524	1
Thr-Ser	206.09	11.2961	C7H14N2O5	Peptide(di-)	Polar peptide	L-Tryptophan	2.97392e-06	1.17257e-05	0.00233471	0.0105063	14.9491	14.9491	H36 up vs H0	0.000558895	0.00222912	26.8959	26.8959	H42 up vs H0	3.02443e-06	1.40057e-05	142.215	142.215	H57 up vs H0	1.54266e-07	1.12597e-06	296.132	296.132	H81 up vs H0	0.0123004	0.0577366	9.51507	9.51507	H312 up vs H0	12.5347	228.656	94.8575	1
2-Aminoacrylate	87.0321	11.2968	C3H5NO2	Amino Acid Metabolism	Cysteine metabolism	L-Azetidine 2-carboxylic acid	7.1685e-07	3.719e-06	0.00217249	0.0100605	0.264538	-3.78018	H36 down vs H0	0.000794377	0.00296281	0.212335	-4.70953	H42 down vs H0	5.73602e-07	4.30202e-06	0.0683884	-14.6224	H57 down vs H0	1.0581e-06	4.86517e-06	0.0842553	-11.8687	H81 down vs H0	0.399291	0.690236	0.704799	-1.41884	H312 down vs H0	14.6762	63.6333	22.5463	1
Vinylacetylglycine	143.058	11.3014	C6H9NO3	0	0	2-Hydroxypyridine	1.72217e-06	7.47355e-06	0.0162315	0.0480675	0.477962	-2.09222	H36 down vs H0	0.000351306	0.00155386	0.29152	-3.4303	H42 down vs H0	5.52561e-07	4.25492e-06	0.138688	-7.21045	H57 down vs H0	2.4408e-06	9.20303e-06	0.178333	-5.60747	H81 down vs H0	0.135357	0.337664	0.629838	-1.58771	H312 down vs H0	13.3298	31.2039	12.1728	1
L-Azetidine 2-carboxylic acid	101.048	11.3024	C4H7NO2	0	0	L-Azetidine 2-carboxylic acid	1.82795e-06	7.83408e-06	0.0194186	0.0555969	0.45216	-2.2116	H36 down vs H0	0.00125471	0.00426479	0.300048	-3.3328	H42 down vs H0	6.63285e-07	4.80381e-06	0.114505	-8.73324	H57 down vs H0	8.97211e-06	2.69163e-05	0.173298	-5.77039	H81 down vs H0	0.435976	0.733716	0.768553	-1.30115	H312 down vs H0	13.2414	38.1351	14.9759	1
2-Aminomuconate semialdehyde	141.043	11.3053	C6H7NO3	Amino Acid Metabolism	Tryptophan metabolism__Naphthalene and	L-Azetidine 2-carboxylic acid	4.6635e-06	1.61699e-05	0.00302044	0.012631	0.199039	-5.02415	H36 down vs H0	0.000358424	0.00156527	0.120718	-8.28375	H42 down vs H0	2.57892e-06	1.24727e-05	0.0457975	-21.8353	H57 down vs H0	8.16184e-06	2.50296e-05	0.064999	-15.3848	H81 down vs H0	0.424005	0.7206	0.657899	-1.51999	H312 down vs H0	11.9041	82.2916	35.9471	1
2-oxobut-3-enanoate	100.016	11.3056	C4H4O3	0	3-methylquinoline degradation	2-Hydroxypyridine	0.00126351	0.00217412	0.07767	0.169596	0.155453	-6.43281	H36 down vs H0	0.00326656	0.00955383	0.032436	-30.83	H42 down vs H0	0.00132161	0.00264321	0.0221954	-45.0543	H57 down vs H0	0.000484187	0.000920356	0.0176051	-56.8017	H81 down vs H0	0.586502	0.853084	0.558279	-1.79122	H312 down vs H0	5.58608	162.791	151.539	1
D-Glycerate	106.027	11.3068	C3H6O4	Carbohydrate Metabolism	Glycine, serine and threonine metabolis	D-Glycerate	4.38125e-07	2.54039e-06	0.858787	0.931703	0.961008	-1.04057	H36 down vs H0	0.342058	0.445321	0.799527	-1.25074	H42 down vs H0	1.49747e-05	4.94423e-05	0.293215	-3.41046	H57 down vs H0	1.02246e-05	2.98939e-05	0.29915	-3.34281	H81 down vs H0	0.617805	0.870265	1.12384	1.12384	H312 up vs H0	15.4726	21.5136	7.23024	1
crotonaldehyde	70.0419	11.3118	C4H6O	0	0	2-Hydroxypyridine	2.05314e-06	8.58586e-06	0.00153907	0.00747856	0.394273	-2.53632	H36 down vs H0	9.78191e-05	0.000624955	0.282937	-3.53436	H42 down vs H0	1.07546e-06	6.80798e-06	0.176008	-5.68157	H57 down vs H0	9.33334e-07	4.38095e-06	0.186762	-5.35442	H81 down vs H0	0.113073	0.300549	0.63728	-1.56917	H312 down vs H0	13.0704	25.6683	10.212	1
Gly-Ser	162.064	11.3256	C5H10N2O4	Peptide(di-)	Polar peptide	L-Tryptophan	7.08019e-06	2.33748e-05	0.000698359	0.00415403	40.5045	40.5045	H36 up vs H0	0.000623016	0.00241506	49.9113	49.9113	H42 up vs H0	3.89515e-06	1.73397e-05	348.429	348.429	H57 up vs H0	2.05491e-07	1.33191e-06	829.105	829.105	H81 up vs H0	0.00164653	0.0126234	34.1341	34.1341	H312 up vs H0	11.3376	298.104	136.726	1
Gln-Leu-Pro-Pro	453.259	11.3354	C21H35N5O6	Peptide(tetra-)	Hydrophobic peptide	L-Tryptophan	3.31186e-13	4.07219e-11	1	1	1	1	No change between H36 and H0	0.106872	0.179857	3.42746	3.42746	H42 up vs H0	4.3719e-10	3.19469e-08	1238.29	1238.29	H57 up vs H0	1.77246e-11	1.3839e-09	2792.09	2792.09	H81 up vs H0	1	1	1	1	No change between H312 and H0	57.2562	810.26	73.5877	1
Leu-Lys-Thr	360.238	11.3486	C16H32N4O5	Peptide(tri-)	Basic peptide	Leu-Lys-Thr	6.99016e-05	0.000157108	0.00858925	0.0299322	27.9761	27.9761	H36 up vs H0	0.000596089	0.00234475	119.289	119.289	H42 up vs H0	4.19356e-05	0.000121069	410.36	410.36	H57 up vs H0	0.00153978	0.00258503	63.1823	63.1823	H81 up vs H0	1	1	1	1	No change between H312 and H0	8.52659	332.324	202.67	1
L-proline amide	114.079	11.4209	C5H10N2O	0	0	L-proline amide	1.89015e-05	5.21682e-05	0.000127902	0.001177	4.76869	4.76869	H36 up vs H0	9.79455e-06	9.79455e-05	7.28313	7.28313	H42 up vs H0	1.28286e-06	7.37645e-06	9.68552	9.68552	H57 up vs H0	1.21142e-05	3.48283e-05	6.50672	6.50672	H81 up vs H0	0.0021292	0.0154647	3.44921	3.44921	H312 up vs H0	10.0732	34.5466	17.8337	1
Leu-Lys	259.189	11.438	C12H25N3O3	Peptide(di-)	Basic peptide	Leu-Lys	7.39934e-05	0.000165764	0.0462355	0.111158	5.46813	5.46813	H36 up vs H0	0.00156745	0.00513217	19.9539	19.9539	H42 up vs H0	1.57567e-05	5.13436e-05	88.4575	88.4575	H57 up vs H0	1.66297e-05	4.53787e-05	71.8827	71.8827	H81 up vs H0	0.000377594	0.00420226	31.827	31.827	H312 up vs H0	8.46265	158.232	97.2282	1
Ala-Asp-Tyr-His	504.197	11.4447	C22H28N6O8	Peptide(tetra-)	Basic peptide	Ala-Asp-Tyr-His	1.08875e-10	3.4147e-09	1	1	1	1	No change between H36 and H0	0.0464984	0.0896199	5.00893	5.00893	H42 up vs H0	2.40397e-08	5.02649e-07	430.732	430.732	H57 up vs H0	4.21713e-09	6.85908e-08	579.975	579.975	H81 up vs H0	1	1	1	1	No change between H312 and H0	34.5665	534.245	80.369	1
Cytidine	243.086	11.4465	C9H13N3O5	Nucleotide Metabolism	Pyrimidine metabolism	Cytidine	3.45031e-05	8.65714e-05	0.0186242	0.0535445	0.447859	-2.23284	H36 down vs H0	1.99276e-05	0.000171875	0.175963	-5.683	H42 down vs H0	0.00216317	0.004067	0.320544	-3.11969	H57 down vs H0	0.160205	0.194392	0.629617	-1.58827	H81 down vs H0	0.585581	0.853084	1.20267	1.20267	H312 up vs H0	9.34287	27.1554	15.114	1
Leu-Arg	287.196	11.4598	C12H25N5O3	Peptide(di-)	Basic peptide	Glu-Val	1.19707e-07	8.97805e-07	0.000291907	0.0021001	18.6018	18.6018	H36 up vs H0	2.07489e-07	8.14961e-06	163.552	163.552	H42 up vs H0	2.76691e-08	5.45476e-07	300.289	300.289	H57 up vs H0	4.19208e-08	3.85672e-07	208.471	208.471	H81 up vs H0	4.37621e-06	0.000167755	68.0476	68.0476	H312 up vs H0	17.72	245.967	72.18	1
Cytosine	111.043	11.4606	C4H5N3O	Nucleotide Metabolism	Pyrimidine metabolism	Cytosine	4.98232e-05	0.000118955	0.00250845	0.0110244	0.360234	-2.77598	H36 down vs H0	7.15189e-06	7.592e-05	0.168339	-5.9404	H42 down vs H0	0.00135493	0.00269425	0.318577	-3.13896	H57 down vs H0	0.0494014	0.064194	0.533034	-1.87605	H81 down vs H0	0.688415	0.931386	0.878731	-1.13801	H312 down vs H0	8.91275	23.5665	13.7495	1
N-Acetyl-D-glucosaminate	237.085	11.4809	C8H15NO7	0	0		0.124676	0.142192	0.120324	0.226689	0.4007	-2.49563	H36 down vs H0	0.423619	0.516426	0.616626	-1.62173	H42 down vs H0	0.708991	0.738978	1.25158	1.25158	H57 up vs H0	0.277953	0.326169	1.87944	1.87944	H81 up vs H0	0.910462	1	0.934695	-1.06987	H312 down vs H0	1.92323	17.698	47.8515	1
Pseudouridine	244.07	11.4924	C9H12N2O6	Nucleotide Metabolism	Pyrimidine metabolism	Pseudouridine	0.0349072	0.0441135	0.0195423	0.0557196	0.338829	-2.95135	H36 down vs H0	0.138187	0.216211	0.499218	-2.00313	H42 down vs H0	0.023768	0.0340247	0.335974	-2.97642	H57 down vs H0	0.136167	0.167778	0.512367	-1.95173	H81 down vs H0	0.00159736	0.012384	0.20183	-4.95467	H312 down vs H0	2.85328	15.3125	27.9064	1
Imidazol-5-yl-pyruvate	154.038	11.4998	C6H6N2O3	Amino Acid Metabolism	Histidine metabolism	Pseudouridine	0.0298633	0.0386041	0.0560876	0.129433	0.459187	-2.17776	H36 down vs H0	0.267954	0.366115	0.631159	-1.58439	H42 down vs H0	0.0913248	0.116477	0.49028	-2.03965	H57 down vs H0	0.37011	0.422289	0.701178	-1.42617	H81 down vs H0	0.00140155	0.0111982	0.233801	-4.27715	H312 down vs H0	2.97035	12.7713	22.3579	1
Glycylproline	172.085	11.5179	C7H12N2O3	Peptide(di-)	Polar peptide	Glycylproline	0.000627376	0.00113844	0.00665835	0.0243083	12.6719	12.6719	H36 up vs H0	0.000357791	0.00156527	40.0292	40.0292	H42 up vs H0	0.000146256	0.000355341	54.3707	54.3707	H57 up vs H0	6.39437e-05	0.000147562	60.0773	60.0773	H81 up vs H0	0.0265994	0.102534	8.28285	8.28285	H312 up vs H0	6.24252	131.373	109.433	1
Orotidine	288.059	11.5321	C10H12N2O8	0	0	Orotidine	1.0985e-05	3.38376e-05	0.353172	0.495303	1.42587	1.42587	H36 up vs H0	0.697442	0.768746	1.16659	1.16659	H42 up vs H0	0.0380331	0.0522766	0.42454	-2.35549	H57 down vs H0	2.81296e-05	7.13583e-05	0.149311	-6.69743	H81 down vs H0	0.734097	0.943039	0.874081	-1.14406	H312 down vs H0	10.7605	43.0129	20.7859	1
Glu-Val	246.121	11.5393	C10H18N2O5	Peptide(di-)	Hydrophobic peptide	Glu-Val	1.8122e-06	7.8151e-06	0.0901173	0.18617	1.92973	1.92973	H36 up vs H0	0.0013852	0.00463974	4.03981	4.03981	H42 up vs H0	7.94819e-07	5.48425e-06	12.339	12.339	H57 up vs H0	1.22706e-06	5.39283e-06	10.4024	10.4024	H81 up vs H0	0.014798	0.0662615	2.76858	2.76858	H312 up vs H0	13.2543	52.4637	20.5829	1
Phenylenediamine	108.069	11.5669	C6H8N2	0	0	Phenylenediamine	0.0535656	0.0658828	0.0143088	0.0436862	0.591206	-1.69146	H36 down vs H0	0.0109624	0.0266196	0.563901	-1.77336	H42 down vs H0	0.00792436	0.0128052	0.547989	-1.82485	H57 down vs H0	0.21409	0.255574	0.774943	-1.29042	H81 down vs H0	0.125285	0.32377	0.71805	-1.39266	H312 down vs H0	2.53615	2.88502	5.91532	1
1-O-methyl-&beta;-D-glucuronate	208.058	11.5731	C7H12O7	0	0	1-O-methyl-&beta;-D-glucuronate	1.59542e-05	4.52126e-05	0.000153103	0.0012883	8.7452	8.7452	H36 up vs H0	0.00053368	0.00217893	7.54704	7.54704	H42 up vs H0	1.57751e-05	5.13436e-05	14.9679	14.9679	H57 up vs H0	2.83099e-07	1.74409e-06	28.732	28.732	H81 up vs H0	0.000104554	0.00167772	10.3702	10.3702	H312 up vs H0	10.2849	70.0879	35.4362	1
urate-3-ribonucleoside	300.071	11.5879	C10H12N4O7	Nucleotide Metabolism	Purine metabolism	urate-3-ribonucleoside	0.000438897	0.000829695	0.157802	0.274957	0.426598	-2.34413	H36 down vs H0	0.071414	0.127327	0.316659	-3.15797	H42 down vs H0	2.32539e-05	7.06838e-05	0.0430921	-23.2061	H57 down vs H0	0.00109167	0.00191667	0.116349	-8.5948	H81 down vs H0	0.0723978	0.218142	0.318001	-3.14465	H312 down vs H0	6.59021	64.1755	50.6376	1
Glycerophosphoglycerol	246.05	11.6021	C6H15O8P	0	0	Glycerophosphoglycerol	0.00181765	0.00299478	0.82084	0.903797	0.827048	-1.20912	H36 down vs H0	0.397181	0.501014	0.474092	-2.10929	H42 down vs H0	0.0199649	0.0291242	0.116531	-8.58137	H57 down vs H0	0.0010235	0.00180157	0.0464561	-21.5257	H81 down vs H0	0.772195	0.956579	1.28869	1.28869	H312 up vs H0	5.25748	102.814	101.69	1
[FA (7:0/2:0)] Heptanedioic acid	160.073	11.6266	C7H12O4	Lipids: Fatty Acyls	Biotin metabolism	[FA (7:0/2:0)] Heptanedioic acid	0.0168446	0.0230154	0.0991537	0.19847	1.38746	1.38746	H36 up vs H0	0.154829	0.236878	1.34054	1.34054	H42 up vs H0	0.239594	0.282115	1.27218	1.27218	H57 up vs H0	0.000635622	0.00118216	2.103	2.103	H81 up vs H0	0.346733	0.639694	1.21127	1.21127	H312 up vs H0	3.4078	3.54678	5.41206	1
N2-Succinyl-L-ornithine	232.106	11.6498	C9H16N2O5	Amino Acid Metabolism	Arginine and proline metabolism	N2-Succinyl-L-ornithine	1.55838e-07	1.06464e-06	1	1	1	1	No change between H36 and H0	0.00637784	0.0167966	14.1227	14.1227	H42 up vs H0	1.07215e-06	6.80798e-06	282.65	282.65	H57 up vs H0	7.26078e-07	3.63039e-06	253.428	253.428	H81 up vs H0	0.00595397	0.0336741	14.4851	14.4851	H312 up vs H0	17.245	357.353	107.755	1
Leu-Lys-Asn	373.233	11.6635	C16H31N5O5	Peptide(tri-)	Basic peptide	Leu-Lys-Asn	6.13548e-05	0.000140647	0.301513	0.439624	0.314143	-3.18327	H36 down vs H0	0.913348	0.943429	1.13435	1.13435	H42 up vs H0	0.0057218	0.00953634	31.6625	31.6625	H57 up vs H0	0.000417498	0.000800204	84.8881	84.8881	H81 up vs H0	0.0198443	0.0834913	17.247	17.247	H312 up vs H0	8.67418	297.044	178.072	1
Met-Cys-His	389.119	11.6891	C14H23N5O4S2	Peptide(tri-)	Basic peptide	Met-Cys-His	0.00403724	0.0061224	0.0227193	0.0619779	0.0981037	-10.1933	H36 down vs H0	0.0604591	0.111245	0.140113	-7.13709	H42 down vs H0	0.000274249	0.000622473	0.014856	-67.3127	H57 down vs H0	0.0562532	0.0724155	0.147248	-6.79127	H81 down vs H0	0.710162	0.93748	0.686447	-1.45678	H312 down vs H0	4.56409	119.054	135.642	1
Glu-Ser	234.085	11.6919	C8H14N2O6	Peptide(di-)	Acidic peptide		0.0311743	0.0401311	0.759296	0.858644	0.815897	-1.22564	H36 down vs H0	0.34426	0.447343	0.516265	-1.93699	H42 down vs H0	0.0298962	0.0422713	0.206652	-4.83906	H57 down vs H0	0.0056854	0.00869829	0.137985	-7.24718	H81 down vs H0	0.49367	0.779478	0.620964	-1.6104	H312 down vs H0	2.93803	36.004	63.7231	1
Urate	168.028	11.692	C5H4N4O3	Nucleotide Metabolism	Purine metabolism	Urate	0.355729	0.37762	0.427275	0.55943	0.371644	-2.69075	H36 down vs H0	0.681168	0.753215	0.587045	-1.70345	H42 down vs H0	0.0843498	0.108878	0.100208	-9.97922	H57 down vs H0	0.738692	0.780079	1.51258	1.51258	H81 up vs H0	0.814537	0.979147	0.738031	-1.35496	H312 down vs H0	1.15862	49.5337	222.311	1
3-beta-D-Galactosyl-sn-glycerol	254.1	11.739	C9H18O8	Carbohydrate Metabolism	Galactose metabolism__Glycerolipid meta	[FA trihydroxy(4:0)] 2,3,4-trihydroxy-b	0.00408862	0.00618672	0.0228751	0.0619779	2.05018	2.05018	H36 up vs H0	0.0835	0.145861	1.74715	1.74715	H42 up vs H0	0.00259272	0.00473274	2.80935	2.80935	H57 up vs H0	0.00013223	0.000280735	3.78132	3.78132	H81 up vs H0	0.0103819	0.0515362	2.35496	2.35496	H312 up vs H0	4.5534	11.3858	13.0027	1
alpha-N-Acetylneuraminyl-2,6-beta-D-galactosyl-1,4-N-acetyl-beta-D- glucosamine	674.238	11.746	C25H42N2O19	0	0	alpha-N-Acetylneuraminyl-2,6-beta-D-gal	7.32705e-12	3.88897e-10	0.669583	0.785735	0.878035	-1.13891	H36 down vs H0	0.534772	0.618078	1.21898	1.21898	H42 up vs H0	1.6298e-06	8.65048e-06	6.95211	6.95211	H57 up vs H0	9.3245e-11	4.94916e-09	22.963	22.963	H81 up vs H0	6.93274e-08	9.88664e-06	10.3554	10.3554	H312 up vs H0	43.8872	113.122	13.4034	1
His-Leu-Lys-Pro	493.301	11.7506	C23H39N7O5	Peptide(tetra-)	Basic peptide	His-Leu-Lys-Pro	0.000135117	0.000279134	0.0207475	0.0586712	29.1966	29.1966	H36 up vs H0	0.0688918	0.12379	15.1196	15.1196	H42 up vs H0	6.35033e-05	0.000174864	907.76	907.76	H57 up vs H0	3.05118e-05	7.68363e-05	993.754	993.754	H81 up vs H0	0.192733	0.429379	6.77896	6.77896	H312 up vs H0	7.802	415.78	277.115	1
P-DPD	212.009	11.7518	C5H9O7P	0	0	P-DPD	2.76775e-07	1.75206e-06	0.0958893	0.194599	0.131261	-7.61842	H36 down vs H0	0.000270324	0.00130436	0.00570161	-175.389	H42 down vs H0	1.27723e-06	7.37645e-06	0.000462476	-2162.27	H57 down vs H0	6.30165e-07	3.31919e-06	0.000462476	-2162.27	H81 down vs H0	0.45341	0.750247	0.39285	-2.5455	H312 down vs H0	16.243	636.752	203.849	1
4-Deoxy-beta-D-gluc-4-enuronosyl-(1,3)-N-acetyl-D-galactosamine	379.112	11.7702	C14H21NO11	0	0	4-Deoxy-beta-D-gluc-4-enuronosyl-(1,3)-	0.0108177	0.0152955	0.0867063	0.182101	4.00505	4.00505	H36 up vs H0	0.0943878	0.162413	4.1091	4.1091	H42 up vs H0	0.268144	0.310436	2.51211	2.51211	H57 up vs H0	0.0991556	0.125077	0.263738	-3.79164	H81 down vs H0	0.567571	0.840395	1.60211	1.60211	H312 up vs H0	3.75565	64.7465	89.6466	1
3-Buten-1-amine	71.0735	11.7752	C4H9N	0	0	3-Buten-1-amine	0.000527808	0.000981637	0.0810223	0.173082	1.47723	1.47723	H36 up vs H0	0.0368271	0.0721895	1.63895	1.63895	H42 up vs H0	0.00062336	0.00131938	2.39437	2.39437	H57 up vs H0	2.31833e-05	6.05928e-05	3.01894	3.01894	H81 up vs H0	0.0298631	0.111987	1.67506	1.67506	H312 up vs H0	6.40959	8.40357	6.81768	1
N(pi)-Methyl-L-histidine	169.085	11.7946	C7H11N3O2	Amino Acid Metabolism	Histidine metabolism	L-Valine	0.0201815	0.0270919	0.226795	0.362242	0.597007	-1.67502	H36 down vs H0	0.848146	0.885356	0.919275	-1.08781	H42 down vs H0	0.763572	0.788416	1.14144	1.14144	H57 up vs H0	0.0212243	0.0293483	2.77814	2.77814	H81 up vs H0	0.481193	0.772147	1.36481	1.36481	H312 up vs H0	3.2683	16.1053	25.6241	1
Ala-Val-Asp-Ser	390.175	11.7967	C15H26N4O8	Peptide(tetra-)	Hydrophobic peptide	Ala-Val-Asp-Ser	0.00284069	0.00443456	0.124526	0.230976	0.251837	-3.97082	H36 down vs H0	0.0237723	0.0501618	0.113153	-8.83758	H42 down vs H0	0.00045843	0.000994706	0.0263502	-37.9504	H57 down vs H0	0.310212	0.358537	0.406928	-2.45744	H81 down vs H0	0.933095	1	1.07995	1.07995	H312 up vs H0	4.86498	104.209	111.385	1
[FA trihydroxy(4:0)] 2,3,4-trihydroxy-butanoic acid	136.037	11.8025	C4H8O5	Carbohydrate Metabolism	Ascorbate and aldarate metabolism	[FA trihydroxy(4:0)] 2,3,4-trihydroxy-b	0.295377	0.317462	0.175887	0.296729	1.30686	1.30686	H36 up vs H0	0.238535	0.335896	1.27424	1.27424	H42 up vs H0	0.151606	0.184169	1.34551	1.34551	H57 up vs H0	0.0232318	0.0318687	1.59023	1.59023	H81 up vs H0	0.478473	0.770158	1.15542	1.15542	H312 up vs H0	1.2976	1.36244	5.45984	1
Ala-Asn-Gly	260.112	11.8062	C9H16N4O5	Peptide(tri-)	Polar peptide	Ala-Asn-Gly	3.06949e-07	1.87429e-06	0.00016303	0.00133918	104.196	104.196	H36 up vs H0	1.17925e-05	0.00011624	384.262	384.262	H42 up vs H0	1.14027e-06	6.84165e-06	1038.98	1038.98	H57 up vs H0	9.39851e-06	2.78325e-05	326.811	326.811	H81 up vs H0	1	1	1	1	No change between H312 and H0	16.0671	508.113	164.448	1
Asn-Leu-Lys-Pro	470.285	11.817	C21H38N6O6	Peptide(tetra-)	Basic peptide	alpha-N-Acetylneuraminyl-2,6-beta-D-gal	2.30414e-09	3.97465e-08	0.405913	0.542269	1.98134	1.98134	H36 up vs H0	0.0299562	0.0611531	6.96806	6.96806	H42 up vs H0	1.03221e-07	1.27183e-06	463.762	463.762	H57 up vs H0	3.67429e-08	3.55207e-07	505.041	505.041	H81 up vs H0	1	1	1	1	No change between H312 and H0	26.1071	485.392	96.6801	1
4-Oxocyclohexanecarboxylate	142.063	11.8309	C7H10O3	0	0		0.416116	0.437683	0.38304	0.520271	1.716	1.716	H36 up vs H0	0.249907	0.347117	2.11288	2.11288	H42 up vs H0	0.934645	0.941467	1.05404	1.05404	H57 up vs H0	0.391976	0.446309	1.69855	1.69855	H81 up vs H0	0.475215	0.767911	0.630952	-1.58491	H312 down vs H0	1.03868	10.918	54.6594	1
(2S)-2-Isopropylmalate	176.068	11.8586	C7H12O5	Amino Acid Metabolism	Valine, leucine and isoleucine biosynth	Ala-Gly-Ser	0.256147	0.276591	0.476163	0.59773	1.20387	1.20387	H36 up vs H0	0.123554	0.201542	1.53211	1.53211	H42 up vs H0	0.456932	0.499656	1.22437	1.22437	H57 up vs H0	0.0249333	0.0341348	1.84192	1.84192	H81 up vs H0	0.426059	0.722311	1.24205	1.24205	H312 up vs H0	1.4025	2.62186	9.721	1
Ala-Gly-Ser	233.101	11.8617	C8H15N3O5	Peptide(tri-)	Polar peptide	Ala-Gly-Ser	0.00194782	0.00319239	0.00796051	0.0281679	20.1751	20.1751	H36 up vs H0	0.000170853	0.000958445	119.759	119.759	H42 up vs H0	0.000180976	0.000429117	116.936	116.936	H57 up vs H0	0.00169722	0.0028287	38.7739	38.7739	H81 up vs H0	0.00563319	0.0321231	26.9644	26.9644	H312 up vs H0	5.1959	161.086	161.213	1
2,7-Anhydro-alpha-N-acetylneuraminic acid	291.095	11.9108	C11H17NO8	0	0	N-Acetyl-D-glucosamine	9.39748e-08	7.36848e-07	0.306829	0.444773	0.768122	-1.30188	H36 down vs H0	0.00397193	0.0113719	0.433683	-2.30583	H42 down vs H0	1.1234e-06	6.82695e-06	0.188834	-5.29564	H57 down vs H0	4.96234e-07	2.76487e-06	0.186824	-5.35263	H81 down vs H0	0.763223	0.95471	0.922682	-1.0838	H312 down vs H0	18.1643	33.0202	9.45288	1
Ala-Ser	176.08	11.9132	C6H12N2O4	Peptide(di-)	Polar peptide	Ala-Ser	1.32819e-06	6.01596e-06	1.36702e-05	0.000285831	404.572	404.572	H36 up vs H0	2.56875e-06	4.12194e-05	1122.31	1122.31	H42 up vs H0	2.41638e-07	2.38186e-06	3356.1	3356.1	H57 up vs H0	1.53232e-07	1.12597e-06	2922.31	2922.31	H81 up vs H0	0.000375844	0.00420226	120.671	120.671	H312 up vs H0	13.7196	491.753	186.384	1
4-Hydroxy-4-methylglutamate	177.064	11.9341	C6H11NO5	Carbohydrate Metabolism	C5-Branched dibasic acid metabolism	4-Hydroxy-4-methylglutamate	2.639e-05	6.89739e-05	0.23575	0.372237	5.34418	5.34418	H36 up vs H0	0.0634729	0.116171	16.3787	16.3787	H42 up vs H0	0.000178037	0.000423605	544.584	544.584	H57 up vs H0	4.94906e-06	1.67395e-05	2731.87	2731.87	H81 up vs H0	0.181853	0.418261	7.23147	7.23147	H312 up vs H0	9.66414	522.994	281.408	1
L-Proline	115.063	11.9384	C5H9NO2	Amino Acid Metabolism	Arginine and proline metabolism__Novobi	L-Proline	0.000969043	0.00170137	0.00436733	0.0171219	2.64249	2.64249	H36 up vs H0	0.00142175	0.00473916	3.19097	3.19097	H42 up vs H0	0.00442937	0.00756501	2.75403	2.75403	H57 up vs H0	1.66388e-05	4.53787e-05	5.15144	5.15144	H81 up vs H0	0.0193129	0.0817541	2.24969	2.24969	H312 up vs H0	5.8311	16.0324	14.2972	1
Guanine	151.049	11.951	C5H5N5O	Nucleotide Metabolism	Purine metabolism	Guanine	0.000503435	0.000941727	0.280304	0.417731	0.27432	-3.64537	H36 down vs H0	0.879421	0.913856	1.20649	1.20649	H42 up vs H0	0.0156146	0.0234219	23.8137	23.8137	H57 up vs H0	0.0649347	0.0831766	9.59194	9.59194	H81 up vs H0	0.0459518	0.151707	0.0766651	-13.0437	H312 down vs H0	6.45566	252.15	203.105	1
(S)-1-Pyrroline-5-carboxylate	113.048	11.9532	C5H7NO2	Amino Acid Metabolism	Glutamate metabolism__Arginine and prol	(S)-1-Pyrroline-5-carboxylate	0.000653731	0.00117774	0.260876	0.39578	1.51009	1.51009	H36 up vs H0	0.442485	0.53564	1.33927	1.33927	H42 up vs H0	0.926442	0.934568	0.965685	-1.03553	H57 down vs H0	0.00147398	0.00248667	0.27945	-3.57846	H81 down vs H0	0.320194	0.606961	0.684142	-1.46168	H312 down vs H0	6.20304	22.6415	18.9803	1
Guanosine	283.092	11.9537	C10H13N5O5	Nucleotide Metabolism	Purine metabolism	Ser-Ser	3.35456e-06	1.27226e-05	0.51028	0.633261	2.17375	2.17375	H36 up vs H0	0.0129215	0.0304294	25.6026	25.6026	H42 up vs H0	1.07408e-05	3.72276e-05	735.606	735.606	H57 up vs H0	3.96636e-05	9.70492e-05	311.781	311.781	H81 up vs H0	1	1	1	1	No change between H312 and H0	12.3638	474.692	199.648	1
Ser-Ser	192.075	11.9644	C6H12N2O5	Peptide(di-)	Polar peptide	Ser-Ser	1.29121e-07	9.38736e-07	0.000307613	0.00216585	41.4215	41.4215	H36 up vs H0	0.000109594	0.000669205	70.5306	70.5306	H42 up vs H0	6.50933e-08	9.35717e-07	1061.6	1061.6	H57 up vs H0	6.10807e-09	8.10493e-08	1943.87	1943.87	H81 up vs H0	2.91786e-05	0.000629163	112.697	112.697	H312 up vs H0	17.5827	399.853	118.255	1
Isobutyronitrile	69.0579	11.9746	C4H7N	0	superpathway of linamarin and lotaustra	Isobutyronitrile	0.0182974	0.0248039	0.00937468	0.0321817	2.16993	2.16993	H36 up vs H0	0.0124148	0.0296409	2.16992	2.16992	H42 up vs H0	0.0165552	0.0245657	2.09331	2.09331	H57 up vs H0	0.000571095	0.00107372	2.95387	2.95387	H81 up vs H0	0.0640239	0.197217	1.7468	1.7468	H312 up vs H0	3.34378	7.23384	11.2495	1
2-Methylcitrate	206.043	11.977	C7H10O7	Carbohydrate Metabolism	Propanoate metabolism	2-Hydroxybutane-1,2,4-tricarboxylate	0.0165141	0.0226086	0.342084	0.485674	0.729025	-1.37169	H36 down vs H0	0.0171848	0.0382501	0.419674	-2.3828	H42 down vs H0	0.0121767	0.0187963	0.398837	-2.50729	H57 down vs H0	0.00338391	0.00535528	0.348787	-2.86708	H81 down vs H0	0.47011	0.763237	0.778778	-1.28406	H312 down vs H0	3.42318	10.3621	15.7407	1
3-Hydroxyanthranilate	153.043	11.9782	C7H7NO3	Amino Acid Metabolism	Tryptophan metabolism__Carbazole degrad	N-Acetylneuraminate	0.0028304	0.00442852	0.51258	0.634973	0.616023	-1.62332	H36 down vs H0	0.260996	0.359455	0.41655	-2.40067	H42 down vs H0	0.00831649	0.0134074	0.113384	-8.8196	H57 down vs H0	0.00113501	0.0019791	0.0693382	-14.4221	H81 down vs H0	0.98178	1	1.01773	1.01773	H312 up vs H0	4.86812	73.5698	78.5853	1
2-Dehydro-D-xylonate	164.032	11.9852	C5H8O6	0	0	2-Dehydro-D-xylonate	0.000106186	0.000227541	0.446407	0.574666	0.596527	-1.67637	H36 down vs H0	0.0661488	0.120112	0.262195	-3.81396	H42 down vs H0	7.22278e-05	0.000194676	0.0373515	-26.7727	H57 down vs H0	0.000448722	0.000857669	0.0683327	-14.6343	H81 down vs H0	0.754704	0.951646	0.802215	-1.24655	H312 down vs H0	8.06286	102.181	65.8998	1
3-Amino-3-(4-hydroxyphenyl)propanoate	181.074	12.0093	C9H11NO3	Amino Acid Metabolism	Tyrosine metabolism	3-Amino-3-(4-hydroxyphenyl)propanoate	1.16963e-05	3.55525e-05	0.000314506	0.00217733	9.64925	9.64925	H36 up vs H0	2.70565e-05	0.000217272	18.1447	18.1447	H42 up vs H0	3.24108e-06	1.47128e-05	28.8209	28.8209	H57 up vs H0	7.45513e-07	3.64826e-06	34.1698	34.1698	H81 up vs H0	0.00205603	0.0150921	7.04803	7.04803	H312 up vs H0	10.6796	90.3697	44.0018	1
N-Acetylneuraminate	309.106	12.0249	C11H19NO9	Carbohydrate Metabolism	Aminosugars metabolism	N-Acetylneuraminate	1.17938e-11	5.42513e-10	0.739029	0.844255	0.924765	-1.08136	H36 down vs H0	0.00994492	0.0246834	0.509296	-1.9635	H42 down vs H0	1.41598e-09	6.51352e-08	0.109615	-9.12283	H57 down vs H0	4.05072e-10	1.28579e-08	0.105261	-9.50021	H81 down vs H0	0.636992	0.887703	0.890608	-1.12283	H312 down vs H0	42.0998	64.4727	7.96341	1
L-Methionine S-oxide	165.046	12.0511	C5H11NO3S	Amino Acid Metabolism	Methionine metabolism	L-Methionine S-oxide	0.000371663	0.000714339	0.491942	0.611603	1.33536	1.33536	H36 up vs H0	0.463074	0.550587	1.3809	1.3809	H42 up vs H0	0.0165365	0.0245657	3.03536	3.03536	H57 up vs H0	4.8599e-05	0.000116435	7.51107	7.51107	H81 up vs H0	0.365477	0.659039	1.49052	1.49052	H312 up vs H0	6.75507	32.9996	25.4028	1
(R)-piperidine-3-carboxamide	128.095	12.0524	C6H12N2O	0	0		2.13866e-07	1.39215e-06	5.15585e-05	0.000655444	4.28215	4.28215	H36 up vs H0	8.21217e-06	8.58545e-05	5.68829	5.68829	H42 up vs H0	5.9969e-08	8.80396e-07	10.4942	10.4942	H57 up vs H0	4.08858e-08	3.85672e-07	9.96136	9.96136	H81 up vs H0	0.00605723	0.0339796	2.55565	2.55565	H312 up vs H0	16.6874	42.8088	13.3398	1
Fagomine	147.089	12.0932	C6H13NO3	0	0	Glaucarubolone	0.000203594	0.000408372	0.0380102	0.0946825	0.410705	-2.43484	H36 down vs H0	0.0166666	0.0372687	0.336888	-2.96834	H42 down vs H0	0.000104785	0.000264841	0.143309	-6.97791	H57 down vs H0	0.000416026	0.000799604	0.192723	-5.18879	H81 down vs H0	0.934481	1	0.965323	-1.03592	H312 down vs H0	7.36853	34.656	24.4569	1
2,3,4,5-Tetrahydrodipicolinate	171.053	12.1088	C7H9NO4	Amino Acid Metabolism	Lysine biosynthesis	N-Acetylneuraminate	0.000904074	0.00159135	0.723791	0.829502	0.911619	-1.09695	H36 down vs H0	0.121102	0.198299	0.648197	-1.54274	H42 down vs H0	0.00725705	0.0119223	0.45469	-2.1993	H57 down vs H0	0.000185777	0.000382644	0.323921	-3.08717	H81 down vs H0	0.446236	0.747337	0.811198	-1.23274	H312 down vs H0	5.89593	11.2268	9.90162	1
Xylitol	152.068	12.1185	C5H12O5	Carbohydrate Metabolism	Pentose and glucuronate interconversion	N-Acetylneuraminate	1.12255e-06	5.30521e-06	0.630268	0.749802	0.930433	-1.07477	H36 down vs H0	0.143191	0.222484	0.791831	-1.2629	H42 down vs H0	6.26329e-06	2.45549e-05	0.418117	-2.39168	H57 down vs H0	9.20907e-05	0.000205002	0.504784	-1.98104	H81 down vs H0	0.4519	0.750247	1.12534	1.12534	H312 up vs H0	13.9761	8.69206	3.23401	1
Tiglic acid	100.052	12.1292	C5H8O2	Lipids: Fatty Acyls	Fatty Acids and Conjugates	3-Butynoate	4.55139e-07	2.61705e-06	0.0752723	0.165407	0.366419	-2.72912	H36 down vs H0	0.00656227	0.0172166	0.187811	-5.32449	H42 down vs H0	2.2569e-06	1.15353e-05	0.0328891	-30.4052	H57 down vs H0	3.1859e-07	1.91154e-06	0.0250351	-39.944	H81 down vs H0	0.300768	0.586242	0.550184	-1.81757	H312 down vs H0	15.4099	128.401	43.3282	1
N-acetyl -D- glucosaminitol	223.106	12.1425	C8H17NO6	0	0	2-Oxobutanoate	4.81737e-05	0.000115416	0.112016	0.216563	0.448303	-2.23063	H36 down vs H0	0.0238628	0.0501992	0.294503	-3.39555	H42 down vs H0	9.07305e-06	3.2777e-05	0.0607635	-16.4572	H57 down vs H0	0.0008296	0.00149069	0.15832	-6.31634	H81 down vs H0	0.795213	0.969429	0.874957	-1.14291	H312 down vs H0	8.95168	60.4364	35.1073	1
enol-Phenylpyruvate	164.047	12.1461	C9H8O3	Amino Acid Metabolism	Phenylalanine metabolism		0.000105051	0.000226515	0.000512392	0.00318514	57.6317	57.6317	H36 up vs H0	0.000431151	0.00183638	74.0728	74.0728	H42 up vs H0	4.85036e-05	0.000136047	179.722	179.722	H57 up vs H0	1.62496e-05	4.46702e-05	220.222	220.222	H81 up vs H0	0.0891665	0.253189	6.59208	6.59208	H312 up vs H0	8.07461	239.61	154.308	1
L-Carnitine	161.105	12.1527	C7H15NO3	Amino Acid Metabolism	Lysine degradation	3-Butynoate	0.000602273	0.00110524	0.249155	0.384601	0.393939	-2.53847	H36 down vs H0	0.0901997	0.155594	0.233969	-4.27407	H42 down vs H0	5.65268e-05	0.00015664	0.0189791	-52.6895	H57 down vs H0	0.0301507	0.0408723	0.163249	-6.12563	H81 down vs H0	0.906877	1	0.907102	-1.10241	H312 down vs H0	6.28182	111.346	92.1711	1
2-Oxobutanoate	102.032	12.1548	C4H6O3	Amino Acid Metabolism	Glycine, serine and threonine metabolis	3-Butynoate	0.000126409	0.000265114	0.0868278	0.182101	0.415618	-2.40605	H36 down vs H0	0.0198582	0.043499	0.278361	-3.59245	H42 down vs H0	2.43317e-05	7.36355e-05	0.0713935	-14.0069	H57 down vs H0	0.00136969	0.00233355	0.170651	-5.85991	H81 down vs H0	0.864664	1	0.91512	-1.09275	H312 down vs H0	7.87366	54.3922	35.9222	1
Betaine aldehyde	101.084	12.1549	C5H11NO	Amino Acid Metabolism	Glycine, serine and threonine metabolis	3-Butynoate	3.93799e-05	9.63552e-05	0.0656779	0.146186	0.421075	-2.37487	H36 down vs H0	0.0180438	0.0400328	0.305244	-3.27606	H42 down vs H0	8.17301e-06	3.04831e-05	0.0740104	-13.5116	H57 down vs H0	0.000654409	0.00120733	0.175128	-5.71012	H81 down vs H0	0.863335	1	0.921522	-1.08516	H312 down vs H0	9.18676	52.8259	29.9011	1
O-Succinyl-L-homoserine	219.074	12.1724	C8H13NO6	Amino Acid Metabolism	Methionine metabolism__Sulfur metabolis	myo-Inositol	0.00169543	0.00280538	0.00131784	0.0065892	110.132	110.132	H36 up vs H0	0.012827	0.0303103	38.3417	38.3417	H42 up vs H0	0.000398146	0.000873395	255.137	255.137	H57 up vs H0	0.00295241	0.00470476	72.598	72.598	H81 up vs H0	0.46211	0.757221	2.76894	2.76894	H312 up vs H0	5.31975	257.677	251.877	1
N-Methyl-2-pyrrolidinone	99.0684	12.1927	C5H9NO	0	0	3-Butynoate	6.02046e-07	3.19879e-06	0.0125706	0.0393459	0.441447	-2.26528	H36 down vs H0	0.000347539	0.00155386	0.269737	-3.70731	H42 down vs H0	8.31073e-06	3.07738e-05	0.171696	-5.82426	H57 down vs H0	8.02682e-07	3.86983e-06	0.140364	-7.12435	H81 down vs H0	0.953495	1	0.981418	-1.01893	H312 down vs H0	14.9551	39.4796	13.7274	1
L-Arabinonate	166.048	12.2034	C5H10O6	Carbohydrate Metabolism	Ascorbate and aldarate metabolism	L-Arabinonate	0.607952	0.620543	0.88774	0.948205	0.95321	-1.04909	H36 down vs H0	0.413003	0.510703	0.746695	-1.33924	H42 down vs H0	0.230983	0.273376	0.650096	-1.53823	H57 down vs H0	0.823275	0.850389	1.07878	1.07878	H81 up vs H0	0.365814	0.659039	0.723863	-1.38148	H312 down vs H0	0.729177	2.3385	16.6766	1
Val-Arg	273.18	12.241	C11H23N5O3	Peptide(di-)	Basic peptide	Val-Arg	8.70209e-07	4.30559e-06	6.21119e-07	3.89611e-05	603.407	603.407	H36 up vs H0	2.48032e-07	8.14961e-06	1167.03	1167.03	H42 up vs H0	1.40547e-07	1.64369e-06	1476.62	1476.62	H57 up vs H0	1.8021e-06	7.40149e-06	400.624	400.624	H81 up vs H0	2.58219e-06	0.000118781	453.318	453.318	H312 up vs H0	14.3706	390.959	141.468	1
N-Acetyl-L-glutamate	189.064	12.2836	C7H11NO5	Amino Acid Metabolism	Arginine and proline metabolism	N-Acetyl-L-glutamate	6.19318e-05	0.0001415	0.000101486	0.00108825	11.419	11.419	H36 up vs H0	0.00032336	0.00146838	9.96498	9.96498	H42 up vs H0	0.000214729	0.000503957	10.8663	10.8663	H57 up vs H0	0.000719077	0.00131608	7.67659	7.67659	H81 up vs H0	0.7133	0.93748	1.22904	1.22904	H312 up vs H0	8.66354	69.4774	41.7015	1
3-sulfopropanal	137.999	12.287	C3H6O4S	0	0	3-sulfopropanal	0.000625669	0.00113844	7.54204e-05	0.000890151	50.2297	50.2297	H36 up vs H0	0.000462147	0.0019444	32.7838	32.7838	H42 up vs H0	0.000242439	0.000557196	40.6371	40.6371	H57 up vs H0	0.000108901	0.000238545	44.7236	44.7236	H81 up vs H0	0.000247587	0.00328529	40.3547	40.3547	H312 up vs H0	6.24514	123.412	102.758	1
4-Hydroxyaniline	109.053	12.3345	C6H7NO	Xenobiotics Biodegradation and Metaboli	gamma-Hexachlorocyclohexane degradation	2-Hydroxypyridine	3.78772e-06	1.3911e-05	0.00462222	0.0178175	0.544393	-1.83691	H36 down vs H0	9.97191e-05	0.00063125	0.390509	-2.56076	H42 down vs H0	5.31207e-06	2.14347e-05	0.310726	-3.21827	H57 down vs H0	7.98099e-06	2.46945e-05	0.336736	-2.96969	H81 down vs H0	0.540879	0.814862	0.880738	-1.13541	H312 down vs H0	12.193	13.3244	5.68254	1
Aminohydroquinone	125.048	12.3452	C6H7NO2	0	0	2-Hydroxypyridine	2.17781e-06	9.05234e-06	0.223164	0.357335	0.72138	-1.38623	H36 down vs H0	0.00244412	0.00749532	0.399656	-2.50215	H42 down vs H0	4.95122e-05	0.000138313	0.265396	-3.76795	H57 down vs H0	3.51221e-06	1.23644e-05	0.215628	-4.63761	H81 down vs H0	0.993699	1	1.00218	1.00218	H312 up vs H0	12.9841	25.238	10.1075	1
pyridine-N-oxide	95.0371	12.3487	C5H5NO	0	0	2-Hydroxypyridine	2.21152e-06	9.07048e-06	0.0460866	0.111158	0.45845	-2.18126	H36 down vs H0	0.00180972	0.00572802	0.258947	-3.8618	H42 down vs H0	8.51894e-06	3.12663e-05	0.116785	-8.56271	H57 down vs H0	3.4702e-06	1.22792e-05	0.112539	-8.88579	H81 down vs H0	0.797169	0.970099	0.903955	-1.10625	H312 down vs H0	12.9617	50.9963	20.4588	1
3'-Sialyllactose	633.212	12.352	C23H39NO19	0	0		1.94565e-09	3.62838e-08	0.559782	0.680559	0.795163	-1.2576	H36 down vs H0	0.0551679	0.10344	0.443252	-2.25605	H42 down vs H0	6.58163e-06	2.55131e-05	0.102507	-9.75544	H57 down vs H0	5.70984e-09	7.72507e-08	0.0371162	-26.9424	H81 down vs H0	0.738686	0.943791	1.14642	1.14642	H312 up vs H0	26.5258	113.332	22.2171	1
Retronecine	155.095	12.3763	C8H13NO2	Biosynthesis of Secondary Metabolites	Alkaloid biosynthesis II	Retronecine	2.53569e-05	6.70354e-05	0.0596849	0.136297	0.505994	-1.97631	H36 down vs H0	0.015269	0.034886	0.391229	-2.55605	H42 down vs H0	1.95666e-05	6.12356e-05	0.152457	-6.55924	H57 down vs H0	7.15077e-05	0.000163921	0.195763	-5.10821	H81 down vs H0	0.862262	1	0.938647	-1.06536	H312 down vs H0	9.71256	32.9937	17.6645	1
Puromycin	471.223	12.4067	C22H29N7O5	Biosynthesis of Secondary Metabolites	Puromycin biosynthesis	Puromycin	2.55833e-13	4.07219e-11	1	1	1	1	No change between H36 and H0	7.36159e-07	1.61395e-05	82.5209	82.5209	H42 up vs H0	1.09067e-10	1.07509e-08	1139.14	1139.14	H57 up vs H0	2.43918e-12	3.90097e-10	3061.39	3061.39	H81 up vs H0	2.15394e-09	1.48622e-06	438.58	438.58	H312 up vs H0	58.521	707.815	62.8943	1
Succinyladenosine	383.108	12.4419	C14H17N5O8	0	0	Succinyladenosine	0.0858736	0.100258	0.288871	0.424991	1.52981	1.52981	H36 up vs H0	0.46361	0.550587	1.35674	1.35674	H42 up vs H0	0.0190274	0.0278746	2.78872	2.78872	H57 up vs H0	0.0206087	0.0285542	2.63275	2.63275	H81 up vs H0	0.624224	0.873098	1.22547	1.22547	H312 up vs H0	2.19225	9.59333	22.7553	1
Phthalate	166.027	12.4447	C8H6O4	Xenobiotics Biodegradation and Metaboli	2,4-Dichlorobenzoate degradation__Napht	Phthalate	0.00728117	0.0105325	0.0884861	0.183902	0.446882	-2.23773	H36 down vs H0	0.219185	0.312474	1.8194	1.8194	H42 up vs H0	0.0753989	0.0983464	0.414622	-2.41184	H57 down vs H0	0.0156392	0.0220225	0.308127	-3.24541	H81 down vs H0	0.149898	0.366771	0.493963	-2.02444	H312 down vs H0	4.07442	23.9522	30.5691	1
Chlorate	83.9614	12.4454	HO3Cl	0	0	Chlorate	0.31332	0.3357	0.10466	0.205741	1.61334	1.61334	H36 up vs H0	0.546408	0.630471	0.833949	-1.19911	H42 down vs H0	0.523728	0.566414	1.21172	1.21172	H57 up vs H0	0.398082	0.452515	1.27688	1.27688	H81 up vs H0	0.739391	0.943791	1.10506	1.10506	H312 up vs H0	1.25382	2.87974	11.9432	1
4-Nitrophenyl-3-ketovalidamine	296.101	12.5041	C13H16N2O6	0	0	4-Nitrophenyl-3-ketovalidamine	1.26184e-21	6.51552e-19	1	1	1	1	No change between H36 and H0	1	1	1	1	No change between H42 and H0	4.44013e-17	1.53185e-14	323.894	323.894	H57 up vs H0	1.80413e-19	7.7796e-17	1008.63	1008.63	H81 up vs H0	1	1	1	1	No change between H312 and H0	274.282	622.747	11.8064	1
2-Acetolactate	132.042	12.5132	C5H8O4	Carbohydrate Metabolism	Butanoate metabolism__Pantothenate and	2-Acetolactate	0.000246198	0.000488151	0.00758715	0.0272663	0.387008	-2.58392	H36 down vs H0	0.0236746	0.0501088	0.439025	-2.27777	H42 down vs H0	4.16076e-05	0.000120627	0.185463	-5.3919	H57 down vs H0	0.000179857	0.000371562	0.239008	-4.18396	H81 down vs H0	0.351673	0.647078	0.722643	-1.38381	H312 down vs H0	7.17198	21.8918	15.8725	1
2-C-Methyl-D-erythritol 4-phosphate	216.04	12.5151	C5H13O7P	Lipid Metabolism	Biosynthesis of steroids	N-Acetyl-L-aspartate	0.0330711	0.0422554	0.124026	0.230669	2.42776	2.42776	H36 up vs H0	0.338583	0.44163	1.76509	1.76509	H42 up vs H0	0.212859	0.254105	2.10498	2.10498	H57 up vs H0	0.142634	0.17512	0.430152	-2.32476	H81 down vs H0	0.281533	0.561438	1.89825	1.89825	H312 up vs H0	2.89371	25.5728	45.9542	1
D-Gluconic acid	196.058	12.5457	C6H12O7	Carbohydrate Metabolism	Pentose phosphate pathway	D-Gluconic acid	0.136088	0.15431	0.0246811	0.0657526	2.66096	2.66096	H36 up vs H0	0.420766	0.516426	1.42002	1.42002	H42 up vs H0	0.36552	0.406789	1.4841	1.4841	H57 up vs H0	0.83381	0.859984	0.916693	-1.09088	H81 down vs H0	0.238461	0.499632	1.67737	1.67737	H312 up vs H0	1.86018	8.89338	24.8608	1
perchlorate	99.9564	12.5514	ClHO4	0	0	perchlorate	0.689255	0.699391	0.806402	0.89504	0.919764	-1.08724	H36 down vs H0	0.214491	0.30833	0.638294	-1.56668	H42 down vs H0	0.847777	0.864056	0.933879	-1.0708	H57 down vs H0	0.753486	0.79013	1.11318	1.11318	H81 up vs H0	0.994183	1	1.0026	1.0026	H312 up vs H0	0.615153	1.9925	16.843	1
N-Acetyl-L-aspartate	175.048	12.6099	C6H9NO5	Amino Acid Metabolism	Alanine and aspartate metabolism	N-Acetyl-L-aspartate	4.39945e-11	1.68646e-09	3.27663e-11	1.13044e-08	18419.3	18419.3	H36 up vs H0	1.00857e-10	3.47956e-08	16827	16827	H42 up vs H0	5.00426e-11	5.7549e-09	23323.5	23323.5	H57 up vs H0	2.09763e-09	4.61538e-08	3083.71	3083.71	H81 up vs H0	5.53743e-05	0.00103265	91.6802	91.6802	H312 up vs H0	37.4834	860.229	119.338	1
N,N-Dimethylglycine	103.063	12.6299	C4H9NO2	Amino Acid Metabolism	Glycine, serine and threonine metabolis	N,N-Dimethylglycine	0.062942	0.075662	0.0128398	0.0397287	0.364571	-2.74295	H36 down vs H0	0.0151395	0.0347052	0.358505	-2.78936	H42 down vs H0	0.0187736	0.0276044	0.372079	-2.6876	H57 down vs H0	0.00408353	0.00631756	0.304446	-3.28466	H81 down vs H0	0.0374462	0.129189	0.421066	-2.37492	H312 down vs H0	2.41804	9.78649	21.0458	1
Lys-Val-Ser	332.206	12.6598	C14H28N4O5	Peptide(tri-)	Basic peptide	Lys-Val-Ser	5.50247e-07	2.99541e-06	2.76044e-05	0.0004535	431.009	431.009	H36 up vs H0	5.53681e-06	6.58689e-05	1212.96	1212.96	H42 up vs H0	5.24472e-06	2.14133e-05	1244.91	1244.91	H57 up vs H0	5.9971e-05	0.000141229	303.298	303.298	H81 up vs H0	1	1	1	1	No change between H312 and H0	15.1003	612.43	210.898	1
2-deoxyglucose-6-phosphate	246.051	12.6923	C6H15O8P	0	0	Glycerophosphoglycerol	0.0203682	0.0272366	0.00111661	0.00597099	4.23653	4.23653	H36 up vs H0	0.0166899	0.0372687	2.86619	2.86619	H42 up vs H0	0.00311829	0.00559786	3.82288	3.82288	H57 up vs H0	0.00767575	0.011439	3.12307	3.12307	H81 up vs H0	0.029832	0.111987	2.57538	2.57538	H312 up vs H0	3.26123	14.3738	22.9188	1
N-Acetyl-D-glucosamine 6-phosphate	301.056	12.7032	C8H16NO9P	Amino Acid Metabolism	Glutamate metabolism__Aminosugars metab	N-Acetyl-D-glucosamine 6-phosphate	3.72534e-10	9.52031e-09	0.140196	0.252572	0.127985	-7.81344	H36 down vs H0	0.00163135	0.00530957	0.00700585	-142.738	H42 down vs H0	1.3916e-08	3.42931e-07	1.08122e-05	-92488.4	H57 down vs H0	1.39586e-09	3.4398e-08	4.45714e-06	-224359	H81 down vs H0	0.386656	0.675424	0.288633	-3.46461	H312 down vs H0	30.9175	1602.02	269.444	1
sn-glycero-3-Phosphocholine	257.103	12.7242	C8H20NO6P	Lipid Metabolism	Glycerophospholipid metabolism__Ether l	sn-Glycerol 3-phosphate	0.000503619	0.000941727	0.795002	0.887624	0.776207	-1.28832	H36 down vs H0	0.379008	0.482501	0.405704	-2.46485	H42 down vs H0	0.00124414	0.00250279	0.0259795	-38.4919	H57 down vs H0	0.00132437	0.00226753	0.0310714	-32.1839	H81 down vs H0	0.883738	1	1.1605	1.1605	H312 up vs H0	6.4553	170.642	137.459	1
Lys-Val	245.174	12.7252	C11H23N3O3	Peptide(di-)	Basic peptide	Lys-Val	0.00233986	0.0037722	0.00324665	0.0133345	134.417	134.417	H36 up vs H0	0.000311723	0.00143393	706.737	706.737	H42 up vs H0	0.000450081	0.000979672	566.159	566.159	H57 up vs H0	0.0897887	0.113469	14.3538	14.3538	H81 up vs H0	0.0348774	0.122159	33.6206	33.6206	H312 up vs H0	5.03403	326.53	337.295	1
Choline phosphate	183.066	12.7268	C5H14NO4P	Lipid Metabolism	Glycerophospholipid metabolism__Glycine	Choline	0.000128041	0.000267722	0.584426	0.703759	0.767944	-1.30218	H36 down vs H0	0.141299	0.220082	0.469797	-2.12858	H42 down vs H0	0.00319476	0.00571084	0.19839	-5.04059	H57 down vs H0	4.32638e-05	0.000104744	0.0965103	-10.3616	H81 down vs H0	0.764452	0.95471	0.860038	-1.16274	H312 down vs H0	7.85984	50.7038	33.5452	1
sn-Glycerol 3-phosphate	172.014	12.7502	C3H9O6P	Lipid Metabolism	Glycerolipid metabolism__Glycerophospho	sn-Glycerol 3-phosphate	1.23949e-05	3.68641e-05	0.766	0.862218	0.804145	-1.24356	H36 down vs H0	0.276533	0.375605	0.431104	-2.31963	H42 down vs H0	0.00128011	0.00256767	0.0650174	-15.3805	H57 down vs H0	1.55642e-05	4.29573e-05	0.0215852	-46.328	H81 down vs H0	0.838725	0.99689	1.16838	1.16838	H312 up vs H0	10.6052	158.118	77.5296	1
2-Oxazolidinone	87.032	12.751	C3H5NO2	0	0	2-Aminoacrylate	3.46776e-05	8.6694e-05	0.326511	0.47034	0.741613	-1.34841	H36 down vs H0	0.0320376	0.0646372	0.492956	-2.02858	H42 down vs H0	0.0136149	0.0208299	0.437638	-2.285	H57 down vs H0	2.1349e-06	8.4176e-06	0.163646	-6.11076	H81 down vs H0	0.225706	0.477721	0.678795	-1.4732	H312 down vs H0	9.33688	23.6785	13.1873	1
2-Deoxy-D-ribose 5-phosphate	214.024	12.7529	C5H11O7P	Carbohydrate Metabolism	Pentose phosphate pathway	sn-Glycerol 3-phosphate	2.45124e-05	6.50522e-05	0.754384	0.856127	0.698032	-1.4326	H36 down vs H0	0.193957	0.284745	0.205265	-4.87176	H42 down vs H0	0.000695898	0.00145948	0.0103753	-96.3828	H57 down vs H0	3.61673e-05	8.95122e-05	0.00350668	-285.17	H81 down vs H0	0.934038	1	1.10433	1.10433	H312 up vs H0	9.75373	357.85	190.78	1
2-Oxoadipate	160.037	12.7529	C6H8O5	Amino Acid Metabolism	Lysine biosynthesis__Lysine degradation	L-Glutamate	0.000133038	0.00027733	0.838238	0.916616	0.909604	-1.09938	H36 down vs H0	0.129218	0.207242	0.471424	-2.12123	H42 down vs H0	0.0113276	0.0176834	0.27033	-3.69918	H57 down vs H0	1.81402e-05	4.87033e-05	0.0902722	-11.0776	H81 down vs H0	0.105879	0.288762	0.447555	-2.23436	H312 down vs H0	7.81865	46.8504	31.1591	1
Phosphite	79.9662	12.7836	[PO3]3-	0	0	N-Acetyl-D-glucosamine 6-phosphate	0.000212682	0.000425364	0.188394	0.310986	0.261413	-3.82536	H36 down vs H0	0.100429	0.171612	0.170841	-5.85341	H42 down vs H0	0.000157362	0.000378326	0.0102535	-97.5272	H57 down vs H0	0.000103856	0.000228948	0.010656	-93.844	H81 down vs H0	0.367268	0.659935	0.386011	-2.5906	H312 down vs H0	7.32312	205.037	145.593	1
D-Sorbitol	182.079	12.7845	C6H14O6	Carbohydrate Metabolism	Fructose and mannose metabolism__Galact	D-Sorbitol	0.0631454	0.0757745	0.289964	0.425692	0.465674	-2.14743	H36 down vs H0	0.564394	0.648483	0.649596	-1.53942	H42 down vs H0	0.0686522	0.0904007	0.245698	-4.07003	H57 down vs H0	0.00843784	0.012467	0.133104	-7.51294	H81 down vs H0	0.812574	0.978493	0.837775	-1.19364	H312 down vs H0	2.41569	34.321	73.8792	1
L-Glutamate	147.053	12.7927	C5H9NO4	Amino Acid Metabolism	Arginine and proline metabolism__Glutam	L-Glutamate	0.0356494	0.0449691	0.0159412	0.0474115	0.399968	-2.5002	H36 down vs H0	0.00715956	0.0186514	0.338402	-2.95507	H42 down vs H0	0.0106303	0.0167081	0.359925	-2.77835	H57 down vs H0	0.00220589	0.00361535	0.299086	-3.34352	H81 down vs H0	0.0582101	0.183402	0.479254	-2.08658	H312 down vs H0	2.83756	10.1728	18.6423	1
Phosphocreatine	211.036	12.8242	C4H10N3O5P	Amino Acid Metabolism	Arginine and proline metabolism		0.000507024	0.000945531	0.00264746	0.011489	0.00417526	-239.506	H36 down vs H0	0.000859732	0.0031554	0.00152986	-653.654	H42 down vs H0	8.68286e-05	0.000228026	0.000339022	-2949.66	H57 down vs H0	5.03499e-05	0.000120213	0.000339022	-2949.66	H81 down vs H0	0.0383603	0.131033	0.0233713	-42.7876	H312 down vs H0	6.44873	497.325	401.023	1
L-Homoserine	119.058	12.827	C4H9NO3	Amino Acid Metabolism	Glycine, serine and threonine metabolis	L-Homoserine	2.00759e-06	8.44656e-06	0.0583921	0.134038	0.227647	-4.39276	H36 down vs H0	0.00971602	0.0242901	0.113161	-8.83699	H42 down vs H0	1.43748e-05	4.81485e-05	0.0156785	-63.7815	H57 down vs H0	8.51047e-07	4.02207e-06	0.00826851	-120.941	H81 down vs H0	0.463014	0.757221	0.559023	-1.78884	H312 down vs H0	13.1033	207.799	82.4643	1
(R)-2-Hydroxyglutarate	148.037	12.9671	C5H8O5	Amino Acid Metabolism	glutamate degradation V (via hydroxyglu	(R)-2-Hydroxyglutarate	4.13464e-06	1.49366e-05	0.11572	0.219964	1.76388	1.76388	H36 up vs H0	0.934598	0.956785	0.97027	-1.03064	H42 down vs H0	0.00326692	0.00580973	0.307305	-3.2541	H57 down vs H0	9.21497e-05	0.000205002	0.199802	-5.00495	H81 down vs H0	0.847713	0.99689	1.0732	1.0732	H312 up vs H0	12.0707	41.6642	17.9488	1
3-Methylcytosine	125.059	12.9757	C5H7N3O	0	0	5-Methylcytosine	6.54553e-05	0.000148566	5.1949e-05	0.000655444	0.0210547	-47.4953	H36 down vs H0	0.000107299	0.000661041	0.0222991	-44.8448	H42 down vs H0	0.11025	0.137315	0.251828	-3.97097	H57 down vs H0	0.437424	0.491567	0.532722	-1.87715	H81 down vs H0	0.283606	0.563588	0.401271	-2.49208	H312 down vs H0	8.60079	155.637	94.0973	1
Pyrimidine	80.0374	12.9764	C4H4N2	Nucleotide Metabolism	0	Fomepizole	9.52996e-06	3.02508e-05	0.281918	0.41833	1.57078	1.57078	H36 up vs H0	0.0140529	0.0324298	3.09639	3.09639	H42 up vs H0	8.78381e-05	0.000228711	7.31536	7.31536	H57 up vs H0	1.19454e-06	5.28353e-06	13.2187	13.2187	H81 up vs H0	0.00273635	0.0183309	4.14103	4.14103	H312 up vs H0	10.9451	52.4648	24.926	1
Succinate	118.027	12.9887	C4H6O4	Carbohydrate Metabolism	Citrate cycle (TCA cycle)__Oxidative ph	Succinate	0.0731733	0.0861597	0.0688617	0.15278	1.49528	1.49528	H36 up vs H0	0.30203	0.40077	1.26255	1.26255	H42 up vs H0	0.064256	0.0859238	1.53398	1.53398	H57 up vs H0	0.160303	0.194392	1.3585	1.3585	H81 up vs H0	0.482415	0.772312	0.854038	-1.17091	H312 down vs H0	2.30833	2.94386	6.63168	1
2(alpha-D-Mannosyl)-D-glycerate	268.079	12.9937	C9H16O9	0	mannosylglycerate biosynthesis I __ man	2(alpha-D-Mannosyl)-D-glycerate	2.43497e-05	6.487e-05	0.821998	0.903797	0.917721	-1.08966	H36 down vs H0	0.0436058	0.084755	0.432998	-2.30948	H42 down vs H0	0.00151329	0.00295542	0.246885	-4.05047	H57 down vs H0	0.000912382	0.00163094	0.243206	-4.11174	H81 down vs H0	0.0907085	0.256512	2.00028	2.00028	H312 up vs H0	9.76183	39.5482	21.0668	1
D-Aspartate	133.037	12.9952	C4H7NO4	Amino Acid Metabolism	Alanine and aspartate metabolism	D-Aspartate	0.0243045	0.0320652	0.00786466	0.0279722	0.215792	-4.6341	H36 down vs H0	0.0132373	0.0308573	0.227905	-4.3878	H42 down vs H0	0.294666	0.33718	0.551655	-1.81273	H57 down vs H0	0.763577	0.799496	0.850563	-1.17569	H81 down vs H0	0.0434528	0.145191	0.307081	-3.25647	H312 down vs H0	3.12622	25.159	41.8482	1
2-Butenoate	86.0368	13.0081	C4H6O2	Lipids: Fatty Acyls	Fatty Acids and Conjugates	2-Butenoate	2.83127e-11	1.14916e-09	0.0112505	0.0371429	2.20429	2.20429	H36 up vs H0	0.000200761	0.00106069	3.69802	3.69802	H42 up vs H0	6.43514e-10	3.53206e-08	17.5793	17.5793	H57 up vs H0	1.75164e-11	1.3839e-09	25.9649	25.9649	H81 up vs H0	0.0120362	0.0576323	2.2633	2.2633	H312 up vs H0	38.9773	92.8251	12.3839	1
Lysosomal-enzyme N-acetyl-D-glucosaminyl-phospho-D-mannose	463.109	13.0084	C14H26NO14P	0	0	(R)-2-Hydroxyglutarate	5.23587e-10	1.24578e-08	0.679042	0.790117	0.684032	-1.46192	H36 down vs H0	0.187768	0.277431	0.277419	-3.60465	H42 down vs H0	4.91162e-07	3.98708e-06	0.00186075	-537.418	H57 down vs H0	2.30907e-09	4.68606e-08	0.000313243	-3192.41	H81 down vs H0	0.509763	0.795784	0.53071	-1.88427	H312 down vs H0	29.9671	700.435	121.542	1
L-Histidine	155.069	13.0349	C6H9N3O2	Amino Acid Metabolism	Histidine metabolism__beta-Alanine meta	L-Histidine	0.000718593	0.00128253	0.468307	0.591128	1.44321	1.44321	H36 up vs H0	0.0657049	0.119621	2.71913	2.71913	H42 up vs H0	0.00359408	0.0062942	5.2934	5.2934	H57 up vs H0	0.000115107	0.000249761	9.58112	9.58112	H81 up vs H0	0.00282645	0.0187524	5.56611	5.56611	H312 up vs H0	6.11271	43.1041	36.6681	1
D-Glucosamine 6-phosphate	259.046	13.0658	C6H14NO8P	Amino Acid Metabolism	Glutamate metabolism__Aminosugars metab	beta-Alanine	3.79023e-06	1.3911e-05	0.905443	0.959687	1.12559	1.12559	H36 up vs H0	0.630013	0.70915	0.605225	-1.65228	H42 down vs H0	0.051437	0.0696333	0.122048	-8.19351	H57 down vs H0	2.77781e-06	1.03605e-05	0.00281857	-354.789	H81 down vs H0	0.898006	1	1.14264	1.14264	H312 up vs H0	12.192	336.606	143.565	1
Allantoin	158.044	13.0788	C4H6N4O3	Nucleotide Metabolism	0	Allantoin	0.00135301	0.00230512	0.198031	0.323795	0.81886	-1.22121	H36 down vs H0	0.00250052	0.00763432	0.589326	-1.69685	H42 down vs H0	0.00151967	0.00295542	0.571278	-1.75046	H57 down vs H0	0.000337435	0.000659576	0.535782	-1.86643	H81 down vs H0	0.267026	0.541906	0.83591	-1.1963	H312 down vs H0	5.52361	3.58822	3.378	1
beta-Alanine	89.0477	13.0991	C3H7NO2	Nucleotide Metabolism	Pyrimidine metabolism__Alanine and aspa	beta-Alanine	3.74596e-05	9.29752e-05	0.0522241	0.122985	0.632555	-1.58089	H36 down vs H0	0.0114018	0.0275079	0.527168	-1.89693	H42 down vs H0	1.49349e-05	4.94423e-05	0.287066	-3.48352	H57 down vs H0	0.000110304	0.000240853	0.359069	-2.78498	H81 down vs H0	0.695802	0.936012	0.91123	-1.09742	H312 down vs H0	9.24561	13.2983	7.47936	1
Creatine	131.069	13.1251	C4H9N3O2	Amino Acid Metabolism	Glycine, serine and threonine metabolis	beta-Alanine	9.27235e-06	2.962e-05	0.099235	0.19847	0.602556	-1.6596	H36 down vs H0	0.0220833	0.047175	0.470757	-2.12424	H42 down vs H0	1.97568e-05	6.14064e-05	0.19994	-5.00151	H57 down vs H0	1.10697e-05	3.22283e-05	0.200578	-4.9856	H81 down vs H0	0.677513	0.923881	0.877955	-1.13901	H312 down vs H0	10.9809	27.3616	12.9571	1
L-Glutamine	146.069	13.1334	C5H10N2O3	Amino Acid Metabolism	Glutamate metabolism__Purine metabolism	beta-Alanine	7.57954e-09	1.02547e-07	0.000548617	0.00336158	0.183586	-5.44704	H36 down vs H0	2.74676e-05	0.000217272	0.102086	-9.7957	H42 down vs H0	4.23221e-09	1.53696e-07	0.020748	-48.1973	H57 down vs H0	4.16983e-08	3.85672e-07	0.0373607	-26.7661	H81 down vs H0	0.225682	0.477721	0.572437	-1.74692	H312 down vs H0	23.3074	122.529	27.3369	1
7-Methyladenine	149.07	13.1708	C6H7N5	Nucleotide Metabolism	BaseExcisionRepair	7-Methyladenine	1.50543e-05	4.34623e-05	0.000110973	0.00109388	0.10827	-9.23619	H36 down vs H0	4.20873e-05	0.000299384	0.0813116	-12.2984	H42 down vs H0	0.00256806	0.00470015	0.182093	-5.49171	H57 down vs H0	1.71941e-06	7.10417e-06	0.0497163	-20.1141	H81 down vs H0	0.144081	0.355056	0.463454	-2.15771	H312 down vs H0	10.358	70.259	35.2719	1
L-Lysine 1,6-lactam	128.095	13.3074	C6H12N2O	Amino Acid Metabolism	0	L-Lysine 1,6-lactam	2.22161e-06	9.07048e-06	3.45853e-05	0.000487017	5.55581	5.55581	H36 up vs H0	9.646e-06	9.78786e-05	7.13785	7.13785	H42 up vs H0	4.5591e-07	3.74498e-06	10.9334	10.9334	H57 up vs H0	3.05262e-06	1.11445e-05	7.64217	7.64217	H81 up vs H0	0.0386079	0.131229	2.18619	2.18619	H312 up vs H0	12.9551	43.4403	17.4364	1
1,2-Diaminobenzene	108.069	13.3192	C6H8N2	0	0	Phenylenediamine	0.00499567	0.00741293	0.00102089	0.00550322	0.546738	-1.82903	H36 down vs H0	0.0360759	0.0711211	0.685983	-1.45776	H42 down vs H0	0.000724794	0.00151548	0.520346	-1.9218	H57 down vs H0	0.00361986	0.00569574	0.593284	-1.68553	H81 down vs H0	0.17777	0.410612	0.789637	-1.2664	H312 down vs H0	4.38509	3.31683	3.93321	1
Methyloxaloacetate	146.021	13.3202	C5H6O5	Carbohydrate Metabolism	C5-Branched dibasic acid metabolism	Methyloxaloacetate	1.32933e-06	6.01596e-06	0.36439	0.500273	1.5962	1.5962	H36 up vs H0	0.374889	0.479757	0.620236	-1.61229	H42 down vs H0	0.00084538	0.00174644	0.135953	-7.35546	H57 down vs H0	3.35344e-06	1.1989e-05	0.0508664	-19.6593	H81 down vs H0	0.161599	0.388514	0.466635	-2.143	H312 down vs H0	13.7183	99.8954	37.866	1
N-Carbamoylsarcosine	132.053	13.3466	C4H8N2O3	Amino Acid Metabolism	Arginine and proline metabolism	L-Asparagine	0.460294	0.479039	0.137571	0.251787	0.504282	-1.98302	H36 down vs H0	0.180797	0.270021	0.526326	-1.89996	H42 down vs H0	0.44555	0.488759	0.696612	-1.43552	H57 down vs H0	0.928882	0.939778	1.04109	1.04109	H81 up vs H0	0.485587	0.774494	0.718801	-1.39121	H312 down vs H0	0.959607	5.43817	29.4688	1
Taurine	125.015	13.3626	C2H7NO3S	Lipid Metabolism	Bile acid biosynthesis__Taurine and hyp	Taurine	0.0708589	0.0840079	0.0451751	0.109372	2.79794	2.79794	H36 up vs H0	0.021483	0.0463227	3.48882	3.48882	H42 up vs H0	0.00983417	0.015635	4.1482	4.1482	H57 up vs H0	0.00641723	0.00973162	4.2605	4.2605	H81 up vs H0	0.125263	0.32377	2.24561	2.24561	H312 up vs H0	2.3317	15.8214	35.2839	1
dimethylthiophosphate	141.985	13.4169	C2H7O3PS	0	methyl parathion degradation		0.233177	0.253773	0.0541495	0.12538	0.482089	-2.07431	H36 down vs H0	0.583622	0.668936	0.810813	-1.23333	H42 down vs H0	0.0944623	0.119814	0.519012	-1.92674	H57 down vs H0	0.839973	0.865047	0.92887	-1.07658	H81 down vs H0	0.666399	0.912332	0.848094	-1.17911	H312 down vs H0	1.47111	5.46454	19.3157	1
sn-glycero-3-Phosphoethanolamine	215.056	13.4214	C5H14NO6P	Lipid Metabolism	Glycerophospholipid metabolism__Ether l	sn-glycero-3-Phosphoethanolamine	0.00223033	0.00362101	0.724913	0.829502	0.647088	-1.54538	H36 down vs H0	0.267617	0.366115	0.235088	-4.25373	H42 down vs H0	0.00312344	0.00559786	0.0155599	-64.2676	H57 down vs H0	0.00296908	0.00472043	0.018121	-55.1847	H81 down vs H0	0.914299	1	1.14899	1.14899	H312 up vs H0	5.07616	215.708	220.97	1
Ethanolamine phosphate	141.019	13.4576	C2H8NO4P	Amino Acid Metabolism	Glycine, serine and threonine metabolis	sn-glycero-3-Phosphoethanolamine	0.00253106	0.00403333	0.154518	0.271563	0.0942163	-10.6139	H36 down vs H0	0.0285414	0.0586118	0.0202231	-49.4485	H42 down vs H0	0.00178052	0.00341267	0.00286165	-349.449	H57 down vs H0	0.000241582	0.000488831	0.00106007	-943.331	H81 down vs H0	0.240433	0.501205	0.132491	-7.54768	H312 down vs H0	4.9653	365.661	382.945	1
Lactosamine	341.132	13.4624	C12H23NO10	Carbohydrate Metabolism	Aminosugars metabolism	Lactosamine	0.00259369	0.00411514	0.983697	1	0.979918	-1.02049	H36 down vs H0	0.629345	0.70915	0.605556	-1.65138	H42 down vs H0	0.253266	0.295692	0.301225	-3.31978	H57 down vs H0	0.000632439	0.00117941	0.0219516	-45.5548	H81 down vs H0	0.976108	1	1.03154	1.03154	H312 up vs H0	4.94399	135.668	142.693	1
Carnosine	226.107	13.4743	C9H14N4O3	Amino Acid Metabolism	Alanine and aspartate metabolism__Histi	Carnosine	0.073015	0.0861597	0.743094	0.847496	0.664314	-1.50531	H36 down vs H0	0.915292	0.944023	0.87066	-1.14855	H42 down vs H0	0.0747704	0.0977113	10.9554	10.9554	H57 up vs H0	0.0502071	0.0651182	12.6211	12.6211	H81 up vs H0	0.288157	0.569709	4.04842	4.04842	H312 up vs H0	2.3099	99.9357	224.973	1
sn-glycero-3-Phospho-1-inositol	334.066	13.508	C9H19O11P	0	0	sn-glycero-3-Phospho-1-inositol	1.33397e-06	6.01596e-06	0.98686	1	1.02142	1.02142	H36 up vs H0	0.660623	0.731669	0.553662	-1.80616	H42 down vs H0	0.00417044	0.007194	0.0152854	-65.4218	H57 down vs H0	2.27497e-06	8.72074e-06	0.000459254	-2177.44	H81 down vs H0	0.69678	0.936012	1.68961	1.68961	H312 up vs H0	13.713	632.18	239.724	1
alpha-D-Galactosyl-1,3-beta-D-galactosyl-1,4-N-acetyl-D-glucosamine	545.195	13.5571	C20H35NO16	0	0	(S)-Malate	1.89213e-06	8.04938e-06	0.878995	0.94178	0.853614	-1.17149	H36 down vs H0	0.404282	0.503785	0.401889	-2.48825	H42 down vs H0	0.0211764	0.0306326	0.0715217	-13.9818	H57 down vs H0	5.93489e-07	3.19928e-06	0.00117003	-854.677	H81 down vs H0	0.450036	0.75006	0.438406	-2.28099	H312 down vs H0	13.1905	396.747	156.407	1
Lys-Thr	247.153	13.5655	C10H21N3O4	Peptide(di-)	Basic peptide	Lys-Thr	8.44247e-07	4.25205e-06	1	1	1	1	No change between H36 and H0	0.0501085	0.0957753	11.7485	11.7485	H42 up vs H0	7.24965e-06	2.76368e-05	809.306	809.306	H57 up vs H0	2.76686e-06	1.03605e-05	931.603	931.603	H81 up vs H0	0.0635722	0.196703	10.2152	10.2152	H312 up vs H0	14.4181	539.444	194.555	1
Lys-His	283.164	13.5669	C12H21N5O3	Peptide(di-)	Basic peptide	Lys-His	0.000397689	0.000760127	1	1	1	1	No change between H36 and H0	0.447184	0.539435	3.1362	3.1362	H42 up vs H0	0.00026284	0.000598547	517.834	517.834	H57 up vs H0	0.0022533	0.00368431	121.932	121.932	H81 up vs H0	0.0332947	0.119033	27.9057	27.9057	H312 up vs H0	6.68773	381.604	296.714	1
(S)-Malate	134.021	13.5685	C4H6O5	Carbohydrate Metabolism	Citrate cycle (TCA cycle)__Glutamate me	(S)-Malate	3.34782e-06	1.27226e-05	0.716387	0.823845	1.11869	1.11869	H36 up vs H0	0.0641983	0.117187	0.539814	-1.85249	H42 down vs H0	2.03259e-05	6.2682e-05	0.190976	-5.23626	H57 down vs H0	1.9135e-05	5.07813e-05	0.203492	-4.9142	H81 down vs H0	0.0361868	0.125472	0.494317	-2.02299	H312 down vs H0	12.3666	32.731	13.763	1
N-Acetyllactosamine	383.143	13.5706	C14H25NO11	0	0	sn-glycero-3-Phospho-1-inositol	2.31337e-05	6.18692e-05	0.877897	0.94178	0.865984	-1.15476	H36 down vs H0	0.524531	0.610331	0.535351	-1.86793	H42 down vs H0	0.0344062	0.0475757	0.115038	-8.69275	H57 down vs H0	8.44762e-06	2.55652e-05	0.00595142	-168.027	H81 down vs H0	0.820134	0.982452	0.800533	-1.24917	H312 down vs H0	9.82434	239.811	126.931	1
3-Hydroxyaminophenol	125.048	13.5718	C6H7NO2	0	0		3.77408e-07	2.20688e-06	0.36266	0.500174	0.758829	-1.31782	H36 down vs H0	0.0091886	0.023055	0.416637	-2.40017	H42 down vs H0	7.15893e-05	0.000193712	0.230773	-4.33327	H57 down vs H0	1.87412e-07	1.28034e-06	0.123602	-8.0905	H81 down vs H0	0.583593	0.853084	0.841412	-1.18848	H312 down vs H0	15.7199	39.5794	13.0925	1
Orthophosphate	97.9769	13.6121	H3O4P	Energy Metabolism	Oxidative phosphorylation__Photosynthes	Orthophosphate	0.00280594	0.00440287	0.0218874	0.060652	0.521386	-1.91796	H36 down vs H0	0.00130166	0.00438119	0.365933	-2.73274	H42 down vs H0	0.000275179	0.000622536	0.309648	-3.22947	H57 down vs H0	0.00100395	0.00177622	0.371748	-2.69	H81 down vs H0	0.000924258	0.00823097	0.352572	-2.8363	H312 down vs H0	4.87564	9.87077	10.5274	1
bathophenanthroline sulfonate	492.044	13.6385	C24H16N2O6S2	0	0	4,4'-Methylene-bis-(2-chloroaniline)	0.00633773	0.00928458	0.046984	0.112176	0.322875	-3.09717	H36 down vs H0	0.639724	0.71774	0.764791	-1.30755	H42 down vs H0	0.00589534	0.00980189	0.183022	-5.46381	H57 down vs H0	0.00244294	0.00395688	0.162187	-6.16573	H81 down vs H0	0.672405	0.918732	0.784943	-1.27398	H312 down vs H0	4.18801	34.9281	43.3681	1
Piperideine	83.0735	13.6422	C5H9N	Amino Acid Metabolism	Lysine degradation__Alkaloid biosynthes	Piperideine	2.76366e-05	7.14203e-05	0.00553239	0.0208598	1.94714	1.94714	H36 up vs H0	0.0134774	0.0312061	1.84025	1.84025	H42 up vs H0	3.04645e-05	9.0998e-05	3.18607	3.18607	H57 up vs H0	1.31534e-05	3.7196e-05	3.25356	3.25356	H81 up vs H0	0.523628	0.802897	1.16035	1.16035	H312 up vs H0	9.60837	13.2294	7.15969	1
alpha,alpha'-Trehalose 6-phosphate	422.083	13.6531	C12H23O14P	Carbohydrate Metabolism	Starch and sucrose metabolism	alpha,alpha'-Trehalose 6-phosphate	1.88856e-21	6.51552e-19	0.174088	0.295137	0.614854	-1.6264	H36 down vs H0	0.000546599	0.00221855	0.238771	-4.18811	H42 down vs H0	6.65961e-19	4.59513e-16	0.000217113	-4605.89	H57 down vs H0	2.25496e-19	7.7796e-17	0.000217113	-4605.89	H81 down vs H0	0.0244164	0.0962705	0.419539	-2.38357	H312 down vs H0	265.729	913.575	17.8776	1
Precorrin 3B	447.159	13.729	C43H50N4O17	Metabolism of Cofactors and Vitamins	Porphyrin and chlorophyll metabolism	Precorrin 3B	0.00119554	0.00206231	0.86823	0.937344	1.23385	1.23385	H36 up vs H0	0.879035	0.913856	0.817644	-1.22303	H42 down vs H0	0.0568298	0.076587	0.0734677	-13.6114	H57 down vs H0	0.00093592	0.00166439	0.00927125	-107.86	H81 down vs H0	0.716436	0.937751	1.6177	1.6177	H312 up vs H0	5.63677	251.631	232.134	1
D-Glucuronate	194.042	13.7767	C6H10O7	Carbohydrate Metabolism	Pentose and glucuronate interconversion	D-Glucuronate	0.00875925	0.0124616	0.608781	0.728005	0.872092	-1.14667	H36 down vs H0	0.113755	0.190051	0.636627	-1.57078	H42 down vs H0	0.578769	0.61819	0.856304	-1.16781	H57 down vs H0	0.236919	0.281367	1.37687	1.37687	H81 up vs H0	0.0338365	0.119729	1.85546	1.85546	H312 up vs H0	3.92465	7.77336	10.2994	1
D-Erythrose	120.042	13.7858	C4H8O4	Carbohydrate Metabolism	0		4.36222e-09	6.54334e-08	0.390961	0.525854	0.756875	-1.32122	H36 down vs H0	0.0749017	0.132518	0.538605	-1.85665	H42 down vs H0	1.48338e-06	8.05932e-06	0.126604	-7.89863	H57 down vs H0	1.10751e-08	1.31756e-07	0.0729141	-13.7148	H81 down vs H0	0.73389	0.943039	0.891727	-1.12142	H312 down vs H0	24.5747	71.1062	15.046	1
Malonate	104.011	13.7925	C3H4O4	Nucleotide Metabolism	Pyrimidine metabolism__beta-Alanine met	D-Glucuronate	0.00736028	0.0106247	0.112048	0.216563	0.69594	-1.43691	H36 down vs H0	0.0131289	0.0307568	0.541796	-1.84571	H42 down vs H0	0.0182822	0.0269545	0.560077	-1.78547	H57 down vs H0	0.528834	0.581044	0.868766	-1.15106	H81 down vs H0	0.383485	0.671585	1.22637	1.22637	H312 up vs H0	4.06562	5.60454	7.16831	1
1-4-beta-D-Glucan	536.159	13.8372	C18H32O18	Carbohydrate Metabolism	Starch and sucrose metabolism	D-Glucuronate	0.00242691	0.0038853	0.832804	0.913569	0.906461	-1.10319	H36 down vs H0	0.240925	0.337332	0.561421	-1.78119	H42 down vs H0	0.150004	0.182867	0.489908	-2.0412	H57 down vs H0	0.00362381	0.00569574	0.229308	-4.36095	H81 down vs H0	0.184692	0.420585	1.92603	1.92603	H312 up vs H0	5.00203	30.113	31.3049	1
Glyceraldehyde	90.0317	13.9215	C3H6O3	Lipid Metabolism	GlycerolipidMetabolism		1.37098e-09	2.62772e-08	0.429486	0.56126	0.7997	-1.25047	H36 down vs H0	0.0621857	0.114117	0.567299	-1.76274	H42 down vs H0	1.5509e-06	8.36033e-06	0.1657	-6.03502	H57 down vs H0	2.53344e-09	4.99451e-08	0.0850469	-11.7582	H81 down vs H0	0.646022	0.893254	0.873569	-1.14473	H312 down vs H0	27.41	60.3383	11.4469	1
D-Xylulose	150.053	13.9274	C5H10O5	Carbohydrate Metabolism	Pentose and glucuronate interconversion		2.52109e-09	4.2428e-08	0.476451	0.59773	0.80903	-1.23605	H36 down vs H0	0.120485	0.198203	0.611499	-1.63533	H42 down vs H0	2.85979e-06	1.35154e-05	0.161957	-6.17449	H57 down vs H0	5.48463e-09	7.56879e-08	0.082474	-12.125	H81 down vs H0	0.73131	0.943039	0.899119	-1.1122	H312 down vs H0	25.8865	63.2147	12.6984	1
3-Butyn-1-ol	70.0419	13.9358	C4H6O	Carbohydrate Metabolism	Butanoate metabolism	3-Butynoate	5.9994e-09	8.27917e-08	0.625882	0.74716	0.886869	-1.12756	H36 down vs H0	0.0583512	0.108524	0.604541	-1.65415	H42 down vs H0	1.58665e-05	5.13985e-05	0.261012	-3.83125	H57 down vs H0	8.72286e-09	1.07478e-07	0.132562	-7.54367	H81 down vs H0	0.816778	0.980134	0.942249	-1.06129	H312 down vs H0	23.8372	40.0598	8.7389	1
hexane-1,3,4,6-tetracarboxylate	262.069	13.9516	C10H14O8	0	methanofuran biosynthesis		5.57979e-05	0.000131401	0.799984	0.891744	0.830866	-1.20356	H36 down vs H0	0.476379	0.56148	0.579086	-1.72686	H42 down vs H0	0.0101462	0.0160202	0.122929	-8.13479	H57 down vs H0	2.63267e-05	6.7031e-05	0.0250664	-39.8941	H81 down vs H0	0.910261	1	0.917552	-1.08986	H312 down vs H0	8.78252	130.604	77.329	1
[FA (5:2)] 2,4-pentadienoic acid	98.0368	13.9519	C5H6O2	Lipids: Fatty Acyls	Fatty Acids and Conjugates		7.42198e-08	6.37041e-07	0.682606	0.791594	0.844327	-1.18438	H36 down vs H0	0.221574	0.315229	0.585517	-1.70789	H42 down vs H0	0.000220654	0.000514362	0.160082	-6.24679	H57 down vs H0	7.49103e-08	6.22748e-07	0.0485219	-20.6093	H81 down vs H0	0.84407	0.99689	0.918598	-1.08862	H312 down vs H0	18.6056	88.4195	24.712	1
hexane-6-ol-1,3,4,6-tetracarboxylate	278.064	13.953	C10H14O9	0	methanofuran biosynthesis		7.57153e-08	6.37116e-07	0.554265	0.67689	0.770454	-1.29794	H36 down vs H0	0.22765	0.323206	0.57023	-1.75368	H42 down vs H0	0.000205024	0.000484474	0.140657	-7.10949	H57 down vs H0	6.39251e-08	5.51354e-07	0.0388925	-25.7119	H81 down vs H0	0.811652	0.978493	0.896338	-1.11565	H312 down vs H0	18.568	99.8365	27.9594	1
Tuliposide B	294.095	13.9547	C11H18O9	0	0		1.90054e-05	5.22458e-05	0.81061	0.897786	0.80804	-1.23756	H36 down vs H0	0.501245	0.585759	0.534091	-1.87234	H42 down vs H0	0.0500974	0.0681799	0.151169	-6.61512	H57 down vs H0	6.53155e-06	2.07685e-05	0.00707338	-141.375	H81 down vs H0	0.904925	1	0.895016	-1.1173	H312 down vs H0	10.0664	221.468	114.404	1
2-Dehydro-3-deoxy-L-rhamnonate	162.053	13.9552	C6H10O5	Carbohydrate Metabolism	Fructose and mannose metabolism		3.49935e-08	3.35354e-07	0.586901	0.705508	0.801256	-1.24804	H36 down vs H0	0.185012	0.274755	0.563973	-1.77314	H42 down vs H0	8.95987e-05	0.000231547	0.1427	-7.00772	H57 down vs H0	3.50573e-08	3.50573e-07	0.0448095	-22.3167	H81 down vs H0	0.762772	0.95471	0.87958	-1.13691	H312 down vs H0	20.0655	92.3737	23.9388	1
6-Acetyl-D-glucose	222.074	13.9567	C8H14O7	0	0		3.81259e-08	3.60368e-07	0.420165	0.554329	0.714959	-1.39868	H36 down vs H0	0.119782	0.198201	0.50247	-1.99017	H42 down vs H0	6.361e-05	0.000174864	0.130577	-7.65829	H57 down vs H0	2.65846e-08	2.7793e-07	0.0405125	-24.6837	H81 down vs H0	0.659635	0.90667	0.826456	-1.20999	H312 down vs H0	19.8947	94.7454	24.7641	1
4-Hydroxy-2-butynal	84.0211	13.9603	C4H4O2	0	0	3-Butynoate	1.20798e-06	5.6318e-06	0.965572	1	0.981408	-1.01894	H36 down vs H0	0.35139	0.454043	0.652576	-1.53239	H42 down vs H0	0.00357414	0.00627521	0.23674	-4.22404	H57 down vs H0	1.04237e-06	4.82706e-06	0.0653291	-15.3071	H81 down vs H0	0.98704	1	0.99265	-1.0074	H312 down vs H0	13.8638	72.9748	27.3712	1
Xylobiose	282.095	13.9615	C10H18O9	0	0		2.82188e-05	7.26528e-05	0.806834	0.89504	0.814009	-1.22849	H36 down vs H0	0.421749	0.516426	0.491513	-2.03453	H42 down vs H0	0.0115253	0.0178707	0.0939242	-10.6469	H57 down vs H0	1.15868e-05	3.34515e-05	0.0110816	-90.24	H81 down vs H0	0.845526	0.99689	0.842632	-1.18676	H312 down vs H0	9.58324	188.765	102.426	1
Propynoate	70.0055	13.9643	C3H2O2	Amino Acid Metabolism	beta-Alanine metabolism__Propanoate met	3-Butynoate	8.73598e-07	4.30559e-06	0.843626	0.919592	0.911107	-1.09757	H36 down vs H0	0.423469	0.516426	0.672412	-1.48718	H42 down vs H0	0.00215186	0.00405679	0.189713	-5.27113	H57 down vs H0	7.01955e-07	3.53539e-06	0.0481691	-20.7602	H81 down vs H0	0.869302	1	0.922101	-1.08448	H312 down vs H0	14.3645	89.0115	32.2224	1
Lactose	342.116	13.9728	C12H22O11	Carbohydrate Metabolism	Galactose metabolism	3-Butynoate	5.40292e-13	4.66002e-11	0.672355	0.787344	0.785449	-1.27316	H36 down vs H0	0.0334774	0.0671494	0.266072	-3.75839	H42 down vs H0	6.6546e-10	3.53206e-08	0.00377937	-264.594	H57 down vs H0	9.81762e-12	1.12903e-09	0.00147619	-677.421	H81 down vs H0	0.722626	0.937751	0.809295	-1.23564	H312 down vs H0	54.9259	496.91	47.0439	1
2,3-Dimethylmaleate	144.042	13.9728	C6H8O4	Metabolism of Cofactors and Vitamins	Nicotinate and nicotinamide metabolism	3-Butynoate	8.58848e-07	4.29424e-06	0.990012	1	0.993812	-1.00623	H36 down vs H0	0.329543	0.43147	0.600656	-1.66485	H42 down vs H0	0.00240243	0.00445612	0.17821	-5.61134	H57 down vs H0	8.35964e-07	3.97804e-06	0.0426715	-23.4349	H81 down vs H0	0.975022	1	0.983914	-1.01635	H312 down vs H0	14.3912	98.5278	35.6013	1
Furfural	96.0211	13.9769	C5H4O2	0	methanofuran biosynthesis	3-Butynoate	1.35021e-06	6.04966e-06	0.91827	0.970301	0.953005	-1.04931	H36 down vs H0	0.435136	0.528598	0.680707	-1.46906	H42 down vs H0	0.0038628	0.00671368	0.214589	-4.66008	H57 down vs H0	1.14346e-06	5.09026e-06	0.0535954	-18.6583	H81 down vs H0	0.980767	1	0.988259	-1.01188	H312 down vs H0	13.6947	83.8846	31.8518	1
2-Hydroxy-2,4-pentadienoate	114.032	13.9869	C5H6O3	Amino Acid Metabolism	Phenylalanine metabolism__Benzoate degr		2.21855e-09	3.97465e-08	0.38051	0.517854	0.778686	-1.28421	H36 down vs H0	0.057809	0.107806	0.55918	-1.78833	H42 down vs H0	1.04782e-06	6.75697e-06	0.156483	-6.39047	H57 down vs H0	5.29039e-09	7.56879e-08	0.0916544	-10.9105	H81 down vs H0	0.711907	0.93748	0.896422	-1.11555	H312 down vs H0	26.2004	58.4652	11.6036	1
D-Glucose 6-phosphate	260.03	14.0556	C6H13O9P	Carbohydrate Metabolism	Starch and sucrose metabolism__Streptom		0.00210198	0.00342067	0.675518	0.787344	1.24479	1.24479	H36 up vs H0	0.278186	0.377108	0.549731	-1.81907	H42 down vs H0	0.0782009	0.101809	0.371398	-2.69253	H57 down vs H0	0.00144856	0.00245579	0.158451	-6.31112	H81 down vs H0	0.741354	0.943791	1.19748	1.19748	H312 up vs H0	5.12842	38.9378	39.4812	1
D-Glucose	180.063	14.0607	C6H12O6	Carbohydrate Metabolism	Glycolysis / Gluconeogenesis__Pentose p		3.86876e-10	9.53374e-09	0.366596	0.501887	0.797453	-1.25399	H36 down vs H0	0.0317515	0.0642478	0.557714	-1.79303	H42 down vs H0	1.95058e-07	2.07062e-06	0.165024	-6.05972	H57 down vs H0	1.12662e-09	2.87914e-08	0.103298	-9.68077	H81 down vs H0	0.607258	0.863934	0.874719	-1.14322	H312 down vs H0	30.8108	53.0527	8.95382	1
D-Glucose 6-sulfate	260.02	14.0766	C6H12O9S	Carbohydrate Metabolism	Glycolysis / Gluconeogenesis		0.00151818	0.00256122	0.758481	0.858644	0.932524	-1.07236	H36 down vs H0	0.918141	0.944139	0.975925	-1.02467	H42 down vs H0	0.0692252	0.0909816	0.640789	-1.56058	H57 down vs H0	0.000652788	0.00120733	0.418764	-2.38798	H81 down vs H0	0.804611	0.977432	1.06044	1.06044	H312 up vs H0	5.41914	7.77446	7.46007	1
Gly-Arg	231.133	14.1969	C8H17N5O3	Peptide(di-)	Basic peptide	Gly-Arg	4.14904e-13	4.08976e-11	1	1	1	1	No change between H36 and H0	0.097346	0.167086	2.48152	2.48152	H42 up vs H0	3.77319e-10	3.19469e-08	170.639	170.639	H57 up vs H0	2.66786e-11	1.67348e-09	264.828	264.828	H81 up vs H0	1	1	1	1	No change between H312 and H0	56.1723	408.142	37.7827	1
Maltotriose	504.169	14.2405	C18H32O16	Carbohydrate Metabolism	glycogen degradation I	Maltotriose	2.20994e-06	9.07048e-06	0.543057	0.665559	0.767222	-1.3034	H36 down vs H0	0.375462	0.479757	0.667007	-1.49924	H42 down vs H0	0.00228552	0.00425586	0.218972	-4.5668	H57 down vs H0	6.84168e-07	3.47115e-06	0.0610981	-16.3671	H81 down vs H0	0.449355	0.75006	0.708272	-1.41189	H312 down vs H0	12.9628	68.0125	27.2831	1
2-Hydroxybutane-1,2,4-tricarboxylate	206.042	14.453	C7H10O7	Amino Acid Metabolism	Lysine biosynthesis__Pyruvate metabolis	2-Hydroxybutane-1,2,4-tricarboxylate	0.000374025	0.000716881	0.0610535	0.138121	0.575606	-1.7373	H36 down vs H0	0.00436168	0.0124362	0.398494	-2.50945	H42 down vs H0	0.000104761	0.000264841	0.260188	-3.84337	H57 down vs H0	3.41873e-05	8.54682e-05	0.244466	-4.09055	H81 down vs H0	0.00296657	0.0194946	0.380647	-2.62711	H312 down vs H0	6.74875	15.2436	11.7454	1
7-methylthioheptyl glucosinolate	463.1	14.4874	C15H29NO9S3	0	0	7-methylthioheptyl glucosinolate	3.10635e-05	7.88009e-05	0.0234526	0.063212	0.0665571	-15.0247	H36 down vs H0	0.194987	0.285383	0.209347	-4.77676	H42 down vs H0	0.000914363	0.00187771	0.0123003	-81.2988	H57 down vs H0	0.00059442	0.00111454	0.0123003	-81.2988	H81 down vs H0	0.116701	0.308521	6.73718	6.73718	H312 up vs H0	9.46797	340.401	186.955	1
2,5-Dioxopentanoate	130.027	14.6571	C5H6O4	Carbohydrate Metabolism	Ascorbate and aldarate metabolism__Argi	2,5-Dioxopentanoate	2.52403e-07	1.61611e-06	0.120572	0.226689	0.473693	-2.11107	H36 down vs H0	0.120645	0.198203	0.458287	-2.18204	H42 down vs H0	6.68356e-07	4.80381e-06	0.0421838	-23.7058	H57 down vs H0	3.02225e-07	1.84545e-06	0.0416624	-24.0024	H81 down vs H0	0.0222301	0.0907618	0.306566	-3.26194	H312 down vs H0	16.4008	100.886	31.9865	1
cis-Aconitate	174.016	14.6583	C6H6O6	Carbohydrate Metabolism	Citrate cycle (TCA cycle)__Glyoxylate a	2,5-Dioxopentanoate	6.70192e-07	3.50328e-06	0.139837	0.252572	0.462268	-2.16325	H36 down vs H0	0.144046	0.222852	0.450637	-2.21908	H42 down vs H0	1.79448e-06	9.3097e-06	0.0391599	-25.5363	H57 down vs H0	6.57765e-07	3.36191e-06	0.0368178	-27.1607	H81 down vs H0	0.0315576	0.11521	0.30042	-3.32867	H312 down vs H0	14.7833	107.703	37.8845	1
Sulfate	97.9674	14.7112	H2O4S	Nucleotide Metabolism	Purine metabolism__Cysteine metabolism_	Sulfate	0.17466	0.194067	0.349667	0.493395	0.860384	-1.16227	H36 down vs H0	0.291174	0.391667	0.837205	-1.19445	H42 down vs H0	0.00993984	0.0157666	0.632124	-1.58197	H57 down vs H0	0.332238	0.382074	0.855555	-1.16883	H81 down vs H0	0.154504	0.376706	0.785177	-1.2736	H312 down vs H0	1.68043	1.18903	3.67939	1
Isocitrate	192.027	14.7754	C6H8O7	Carbohydrate Metabolism	Citrate cycle (TCA cycle)__Glyoxylate a	Isocitrate	0.00022678	0.00045225	0.0877314	0.183343	0.36489	-2.74055	H36 down vs H0	0.0352547	0.0699017	0.267606	-3.73684	H42 down vs H0	9.80276e-05	0.000251446	0.0654314	-15.2832	H57 down vs H0	2.56148e-05	6.57034e-05	0.0550472	-18.1662	H81 down vs H0	0.0249375	0.0977661	0.243551	-4.10591	H312 down vs H0	7.25663	66.4972	47.6509	1
2-Furoate	112.016	14.7784	C5H4O3	0	0	Isocitrate	0.000325109	0.000633687	0.0914962	0.187336	0.366077	-2.73166	H36 down vs H0	0.0464582	0.0896199	0.285835	-3.49853	H42 down vs H0	0.000136906	0.000334982	0.0688323	-14.5281	H57 down vs H0	3.67008e-05	9.04412e-05	0.057953	-17.2554	H81 down vs H0	0.0331184	0.119033	0.259813	-3.84892	H312 down vs H0	6.88919	64.3006	48.5345	1
Phosphoramidate	96.993	14.8365	H4NO3P	0	0		0.0580968	0.0708897	0.451044	0.576334	1.26474	1.26474	H36 up vs H0	0.13458	0.212494	0.609505	-1.64068	H42 down vs H0	0.383127	0.425013	0.752458	-1.32898	H57 down vs H0	0.410831	0.465473	1.29249	1.29249	H81 up vs H0	0.205723	0.44638	1.51601	1.51601	H312 up vs H0	2.47661	6.62222	13.9043	1
Carbamoyl phosphate	140.983	14.9117	CH4NO5P	Amino Acid Metabolism	Arginine and proline metabolism__Purine		0.0500256	0.0619706	0.166163	0.284498	1.5224	1.5224	H36 up vs H0	0.12414	0.20202	0.612847	-1.63173	H42 down vs H0	0.67654	0.708365	0.878083	-1.13884	H57 down vs H0	0.51987	0.57302	1.21224	1.21224	H81 up vs H0	0.238955	0.499632	1.44975	1.44975	H312 up vs H0	2.58641	6.38915	12.8454	1
4-Hydroxybenzoate	138.032	15.6694	C7H6O3	Metabolism of Cofactors and Vitamins	Ubiquinone biosynthesis__Phenylalanine	5-Sulfosalicylate	0.139613	0.157664	0.875992	0.941487	1.05028	1.05028	H36 up vs H0	0.723386	0.786989	1.12337	1.12337	H42 up vs H0	0.259638	0.302108	0.6875	-1.45455	H57 down vs H0	0.0481149	0.0626401	0.524323	-1.90722	H81 down vs H0	0.42929	0.725354	0.77023	-1.29831	H312 down vs H0	1.84178	5.06564	14.3021	1
N-(2,3-Dihydroxybenzoyl)-L-serine	241.059	15.8017	C10H11NO6	0	0	beta-Citryl-L-glutamic acid	0.0161899	0.0222088	0.0598521	0.136297	0.259735	-3.85008	H36 down vs H0	0.0021114	0.00650386	0.0869332	-11.5031	H42 down vs H0	0.00524627	0.00887237	0.112986	-8.85068	H57 down vs H0	0.0372802	0.049755	0.222265	-4.49913	H81 down vs H0	0.46321	0.757221	0.586966	-1.70368	H312 down vs H0	3.43859	45.8077	69.2727	1
beta-Citryl-L-glutamic acid	321.07	15.8072	C11H15NO10	0	0	beta-Citryl-L-glutamic acid	0.000197897	0.000398101	0.00280627	0.0118793	0.230052	-4.34685	H36 down vs H0	0.000601479	0.00234475	0.162814	-6.14198	H42 down vs H0	1.80417e-05	5.74218e-05	0.087598	-11.4158	H57 down vs H0	0.000930234	0.00165856	0.189598	-5.27432	H81 down vs H0	0.253111	0.521334	0.580703	-1.72205	H312 down vs H0	7.39813	41.6261	29.2581	1
&alpha; -allenylagmatine	84.0687	16.4223	C8H16N4	0	0		0.810246	0.81497	0.434214	0.566366	0.916852	-1.09069	H36 down vs H0	0.287209	0.387816	0.883353	-1.13205	H42 down vs H0	0.618927	0.656006	0.944157	-1.05915	H57 down vs H0	0.902697	0.918674	1.01358	1.01358	H81 up vs H0	0.592968	0.853084	0.94009	-1.06373	H312 down vs H0	0.448753	0.152133	1.76286	1
1-Methylpyrrolinium	83.0735	16.564	C5H9N	Metabolism of Cofactors and Vitamins	Nicotinate and nicotinamide metabolism_	1-Methylpyrrolinium	7.03857e-11	2.42831e-09	0.218652	0.353325	1.25511	1.25511	H36 up vs H0	0.398846	0.502196	1.17526	1.17526	H42 up vs H0	8.7308e-08	1.15851e-06	3.97584	3.97584	H57 up vs H0	1.34941e-10	5.64693e-09	6.3084	6.3084	H81 up vs H0	0.0619871	0.192663	1.44368	1.44368	H312 up vs H0	35.9454	33.1473	4.79523	1
4-(Trimethylammonio)but-2-enoate	143.094	16.6151	C7H13NO2	0	0	1-Methylpyrrolinium	4.69242e-12	2.95124e-10	1	1	1	1	No change between H36 and H0	1	1	1	1	No change between H42 and H0	3.86412e-09	1.48125e-07	129.94	129.94	H57 up vs H0	1.13183e-10	5.57448e-09	255.622	255.622	H81 up vs H0	0.000390529	0.00427722	9.83979	9.83979	H312 up vs H0	45.6208	374.786	42.7193	1
beta-Aminopropionitrile	70.0531	17.6408	C3H6N2	Amino Acid Metabolism	beta-Alanine metabolism__Cyanoamino aci	beta-Aminopropionitrile	0.0245146	0.0322807	0.35045	0.493491	1.27953	1.27953	H36 up vs H0	0.0857138	0.148974	1.62203	1.62203	H42 up vs H0	0.148084	0.180846	1.49723	1.49723	H57 up vs H0	0.00114511	0.00198679	2.57855	2.57855	H81 up vs H0	0.330402	0.615812	1.30809	1.30809	H312 up vs H0	3.11967	5.95053	9.9186	1
NG,NG-Dimethyl-L-arginine	202.143	17.6524	C8H18N4O2	0	0	NG,NG-Dimethyl-L-arginine	0.00274436	0.00432331	0.0997865	0.198996	1.47456	1.47456	H36 up vs H0	0.05959	0.110198	1.59706	1.59706	H42 up vs H0	0.0588115	0.0789493	1.59952	1.59952	H57 up vs H0	5.67366e-05	0.00013453	2.98191	2.98191	H81 up vs H0	0.0734208	0.219309	1.55796	1.55796	H312 up vs H0	4.89489	7.19302	7.64138	1
Lys-Lys	274.201	18.0701	C12H26N4O3	Peptide(di-)	Basic peptide	Lys-Lys	6.00455e-11	2.1806e-09	1	1	1	1	No change between H36 and H0	1	1	1	1	No change between H42 and H0	9.61512e-08	1.2286e-06	125.198	125.198	H57 up vs H0	9.40431e-10	2.49576e-08	364.209	364.209	H81 up vs H0	0.134795	0.337664	2.77985	2.77985	H312 up vs H0	36.4592	416.192	59.3594	1
N6-Hydroxy-L-lysine	162.1	18.0923	C6H14N2O3	Amino Acid Metabolism	Lysine degradation	N6-Hydroxy-L-lysine	5.74113e-05	0.000133544	0.00923838	0.0318724	0.345021	-2.89837	H36 down vs H0	0.00152237	0.00502602	0.246569	-4.05566	H42 down vs H0	0.000220129	0.000514362	0.183675	-5.44439	H57 down vs H0	0.000750936	0.00136714	0.235839	-4.24018	H81 down vs H0	0.52132	0.802652	1.29298	1.29298	H312 up vs H0	8.74991	35.5606	21.1334	1
L-Ornithine	132.09	18.1963	C5H12N2O2	Amino Acid Metabolism	Arginine and proline metabolism__D-Argi	L-Ornithine	0.217137	0.23744	0.689296	0.797026	0.863045	-1.15869	H36 down vs H0	0.648977	0.722248	0.839268	-1.19151	H42 down vs H0	0.05081	0.0690136	0.458785	-2.17967	H57 down vs H0	0.939694	0.949325	0.972555	-1.02822	H81 down vs H0	0.625088	0.873098	1.20704	1.20704	H312 up vs H0	1.52294	5.73657	19.5872	1
Choline	103.1	18.2647	C5H13NO	Amino Acid Metabolism	Glycine, serine and threonine metabolis	Choline	3.51457e-09	5.63965e-08	0.098824	0.19847	0.629117	-1.58953	H36 down vs H0	0.00186756	0.00585736	0.375716	-2.66159	H42 down vs H0	2.55462e-06	1.24727e-05	0.184061	-5.43299	H57 down vs H0	8.25905e-09	1.03614e-07	0.104921	-9.53096	H81 down vs H0	0.559045	0.831339	1.18218	1.18218	H312 up vs H0	25.0851	52.1796	10.8165	1
Ala-Ala-Gln	288.143	18.4284	C11H20N4O5	Peptide(tri-)	Polar peptide	Ala-Ala-Gln	0.000137278	0.000282751	0.590916	0.709099	0.612894	-1.6316	H36 down vs H0	0.0478877	0.0917848	0.142161	-7.03428	H42 down vs H0	0.000479164	0.00103644	0.0235347	-42.4905	H57 down vs H0	0.000124881	0.000269275	0.0174148	-57.4223	H81 down vs H0	0.679205	0.924362	0.67506	-1.48135	H312 down vs H0	7.78498	178.791	119.424	1
5-Aminopentanamide	116.095	18.5237	C5H12N2O	Amino Acid Metabolism	Lysine degradation	5-Aminopentanamide	0.00652862	0.00952378	0.0030108	0.012631	0.536191	-1.86501	H36 down vs H0	0.0118098	0.0283929	0.583491	-1.71382	H42 down vs H0	0.179753	0.21608	0.760125	-1.31557	H57 down vs H0	0.823273	0.850389	0.957938	-1.04391	H81 down vs H0	0.870724	1	0.967832	-1.03324	H312 down vs H0	4.16363	4.2874	5.35457	1
N6-Methyl-L-lysine	160.121	18.6412	C7H16N2O2	Amino Acid Metabolism	0	N6-Methyl-L-lysine	0.00423785	0.0063985	0.00955453	0.032476	0.464761	-2.15164	H36 down vs H0	0.2291	0.323938	0.703076	-1.42232	H42 down vs H0	0.0514681	0.0696333	0.5577	-1.79308	H57 down vs H0	0.777239	0.812568	1.08143	1.08143	H81 up vs H0	0.316085	0.600823	1.33962	1.33962	H312 up vs H0	4.52312	9.62754	11.0683	1
Thiamin	264.104	19.0855	C12H16N4OS	Metabolism of Cofactors and Vitamins	Thiamine metabolism	Thiamin	0.00690139	0.0100252	0.445484	0.574549	0.595835	-1.67832	H36 down vs H0	0.143486	0.222484	0.348882	-2.8663	H42 down vs H0	0.000761941	0.00158355	0.0698781	-14.3106	H57 down vs H0	0.0268034	0.0364781	0.208302	-4.80073	H81 down vs H0	0.741229	0.943791	0.792159	-1.26237	H312 down vs H0	4.11815	52.2097	65.9253	1
L-Lysine	146.106	19.365	C6H14N2O2	Amino Acid Metabolism	Lysine biosynthesis__Lysine degradation	L-Lysine	3.61271e-06	1.34744e-05	0.0236282	0.0634375	2.16598	2.16598	H36 up vs H0	0.000660499	0.00254606	3.66354	3.66354	H42 up vs H0	8.57491e-06	3.13052e-05	6.38069	6.38069	H57 up vs H0	1.92605e-07	1.30155e-06	9.51585	9.51585	H81 up vs H0	0.000148057	0.0022702	4.43788	4.43788	H312 up vs H0	12.2593	35.957	15.2518	1
L-Arginine	174.112	20.7144	C6H14N4O2	Amino Acid Metabolism	Arginine and proline metabolism__Clavul	L-Arginine	1.54158e-05	4.43205e-05	0.450715	0.576334	1.21267	1.21267	H36 up vs H0	0.132025	0.210386	1.50529	1.50529	H42 up vs H0	0.000398724	0.000873395	2.9097	2.9097	H57 up vs H0	3.0101e-06	1.10477e-05	4.44259	4.44259	H81 up vs H0	0.0940126	0.263694	1.57956	1.57956	H312 up vs H0	10.3281	18.5868	9.35809	1

## Sheet: 36-hour
Putative Metabolites	Mass	RT	FORMULA	Map	Pathway	BP	p-value(H36 vs. H0)	FDR-stepup (p-value(H36 vs. H0))	Ratio(H36 vs. H0)	Fold-Change(H36 vs. H0)	Fold-Change(H36 vs. H0) (Description)
Cholesterolsulfate	466.312	3.43229	C27H46O4S	Lipids: Sterol lipids	0	Cholesterolsulfate	0.000170325	0.00136656	2.57981	2.57981	H36 up vs H0
PI(16:0/18:2(9Z,12Z))	834.525	3.5322	C43H79O13P	Lipids: Glycerophospholipids	Glycerophosphoinositols	[PS (18:1/18:1)] 1,2-di-(9E-octadecenoy	0.00602522	0.0223516	2.03768	2.03768	H36 up vs H0
5-O-Methylembelin	308.199	3.58755	C18H28O4	0	0	5-O-Methylembelin	0.000225143	0.00170713	508.487	508.487	H36 up vs H0
1,6-Dimethylnaphthalene	156.094	3.70294	C12H12	0	0	Styrene	0.0123907	0.0393459	2.09279	2.09279	H36 up vs H0
[PE (18:1/18:1)] 1-(1Z-octadecenyl)-2-(9Z-octadecenoyl)-sn-glycero-3-phosphoethanolamine	729.567	3.85028	C41H80NO7P	Lipids: Glycerophospholipids	Glycerophosphoethanolamines	[PE (18:1/18:1)] 1-(1Z-octadecenyl)-2-(	0.000103507	0.00108825	71.627	71.627	H36 up vs H0
butylene	70.0783	3.98274	C5H10	0	0	butylene	0.00378902	0.0150254	0.484144	-2.0655	H36 down vs H0
[ST hydrox] N-(3alpha,7alpha-dihydroxy-5beta-cholan-24-oyl)-taurine	499.297	4.03211	C26H45NO6S	Lipids: Sterol lipids	Bile acid biosynthesis	[ST hydrox] N-(3alpha,7alpha-dihydroxy-	0.000131346	0.001177	205.684	205.684	H36 up vs H0
Phe-Phe	312.147	4.16124	C18H20N2O3	Peptide(di-)	Hydrophobic peptide		1.14606e-05	0.000247118	1545.81	1545.81	H36 up vs H0
Avenacoside A	531.261	4.19918	C51H82O23	0	0	Avenacoside A	1.11469e-05	0.000247118	429.593	429.593	H36 up vs H0
Leu-Leu-Val	343.247	4.2057	C17H33N3O4	Peptide(tri-)	Hydrophobic peptide	Leu-Leu-Val	3.45824e-05	0.000487017	28.7331	28.7331	H36 up vs H0
Leu-Phe	278.163	4.34194	C15H22N2O3	Peptide(di-)	Hydrophobic peptide		2.62681e-05	0.0004535	142.738	142.738	H36 up vs H0
Glycodeoxycholate	449.314	4.46064	C26H43NO5	Lipid Metabolism	Bile acid biosynthesis	Glycodeoxycholate	0.000307469	0.00216585	13.1691	13.1691	H36 up vs H0
[ST hydrox] 3alpha,7alpha-Dihydroxy-5beta-cholan-24-oic Acid	392.293	4.49379	C24H40O4	Lipids: Sterol lipids	Bile acids and derivatives	Ala-Ala-Asp-Arg	0.00347376	0.0141828	33.1042	33.1042	H36 up vs H0
Quinolin-2-ol	145.053	4.52618	C9H7NO	0	0	Agroclavine	0.0125864	0.0393459	2.70743	2.70743	H36 up vs H0
Leucyl-leucine	244.179	4.56417	C12H24N2O3	Peptide(di-)	Hydrophobic peptide	Ile-Val-Pro-Tyr	0.000489245	0.0031098	13.0336	13.0336	H36 up vs H0
Indole-5,6-quinone	147.032	4.56655	C8H5NO2	Amino Acid Metabolism	Tyrosine metabolism	Indole-5,6-quinone	0.00035282	0.00237842	0.127218	-7.86053	H36 down vs H0
LPA(0:0/18:2(9Z,12Z))	434.243	4.6133	C21H39O7P	Lipid Metabolism	Glycerolipid metabolism__Glycerophospho	Arg-Leu-Phe-Phe	0.00185282	0.00875647	8.41083	8.41083	H36 up vs H0
4-Pyridoxolactone	165.042	4.61859	C8H7NO3	Metabolism of Cofactors and Vitamins	Vitamin B6 metabolism	Indole-5,6-quinone	0.00447228	0.0173364	0.0342584	-29.1899	H36 down vs H0
Tetrahydroharmine	216.126	4.63145	C13H16N2O	0	0	Tetrahydroharmine	1.13463e-05	0.000247118	7.20625	7.20625	H36 up vs H0
Lenacil	234.137	4.69225	C13H18N2O2	0	0	Lenacil	0.00317701	0.0132057	26.3432	26.3432	H36 up vs H0
(-)-Sativan	286.12	4.69376	C17H18O4	0	vestitol and sativan biosynthesis		0.012468	0.0393459	0.0645865	-15.4831	H36 down vs H0
Leu-Trp	317.174	4.71475	C17H23N3O3	Peptide(di-)	Hydrophobic peptide	Leu-Trp	0.00234489	0.0105063	7.02856	7.02856	H36 up vs H0
[FA (7:2)] 2,4-heptadienal	110.073	4.79695	C7H10O	Lipids: Fatty Acyls	Fatty aldehydes	(8S,9S,10S)-8,10-dimethyl-1-octalin	0.00129157	0.00650588	0.0436026	-22.9344	H36 down vs H0
Leu-Val	230.163	4.80558	C11H22N2O3	Peptide(di-)	Hydrophobic peptide	Leu-Val	2.99616e-05	0.000470337	48.1679	48.1679	H36 up vs H0
Phe-Tyr	328.142	4.82928	C18H20N2O4	Peptide(di-)	Hydrophobic peptide	Phe-Tyr	2.19409e-06	8.2621e-05	1841.6	1841.6	H36 up vs H0
8-keto-7-aminoperlagonate	185.105	4.83799	C9H15NO3	0	0	8-keto-7-aminoperlagonate	0.012449	0.0393459	0.189087	-5.28856	H36 down vs H0
Leu-Leu-Ser	331.211	4.83987	C15H29N3O5	Peptide(tri-)	Hydrophobic peptide	Leu-Leu-Ser	6.60314e-06	0.000182247	960.741	960.741	H36 up vs H0
Myxochlin B	405.19	4.84295	C20H27N3O6	0	0	Myxochlin B	9.13342e-05	0.00101646	279.99	279.99	H36 up vs H0
Glycocholate	465.309	4.89227	C26H43NO6	Lipid Metabolism	Bile acid biosynthesis	Glycocholate	0.013431	0.0411884	3.63165	3.63165	H36 up vs H0
Leu-Val-Pro	327.216	4.93511	C16H29N3O4	Peptide(tri-)	Hydrophobic peptide	Leu-Val-Pro	0.0164549	0.048521	6.5396	6.5396	H36 up vs H0
Agroclavine	119.074	4.94233	C16H18N2	0	0	Agroclavine	9.02253e-05	0.00101646	3.3806	3.3806	H36 up vs H0
Ala-Val-Val-Pro	384.237	4.94737	C18H32N4O5	Peptide(tetra-)	Hydrophobic peptide	Ala-Val-Val-Pro	0.000491259	0.0031098	1881.97	1881.97	H36 up vs H0
N6-Methyl-2'-deoxyadenosine	265.118	4.95427	C11H15N5O3	0	0	Agroclavine	0.000292188	0.0021001	36.1618	36.1618	H36 up vs H0
Leu-Tyr	294.158	4.96695	C15H22N2O4	Peptide(di-)	Hydrophobic peptide	Leu-Tyr	0.0166107	0.048772	12.6403	12.6403	H36 up vs H0
Nitroethane	75.032	4.97908	C2H5NO2	0	0		0.00119394	0.00624106	0.138875	-7.2007	H36 down vs H0
N-Phenylacetamide	135.068	4.98098	C8H9NO	0	0	2-Phenylacetamide	1.41309e-05	0.000286774	4.13777	4.13777	H36 up vs H0
Phe-Ala	236.116	5.0024	C12H16N2O3	Peptide(di-)	Hydrophobic peptide	Phe-Ala	1.40579e-06	6.92852e-05	544.439	544.439	H36 up vs H0
Leu-Val-Gly	287.185	5.00391	C13H25N3O4	Peptide(tri-)	Hydrophobic peptide	Leu-Val-Gly	7.37673e-06	0.000188516	1162.98	1162.98	H36 up vs H0
N3-methylthymine	140.058	5.00541	C6H8N2O2	0	0		6.28117e-06	0.000180584	38.16	38.16	H36 up vs H0
Phe-Pro	262.132	5.00614	C14H18N2O3	Peptide(di-)	Hydrophobic peptide	Phe-Pro	0.000375446	0.00249094	70.0397	70.0397	H36 up vs H0
Diacetylmonoxime	101.048	5.0117	C4H7NO2	0	0	Agroclavine	0.0050345	0.0192989	11.893	11.893	H36 up vs H0
valeronitrile	83.0735	5.0827	C5H9N	0	0	Piperideine	0.000141424	0.00123522	3.29786	3.29786	H36 up vs H0
(Z)-Phenylacetaldehyde oxime	135.068	6.24693	C8H9NO	Xenobiotics Biodegradation and Metaboli	Styrene degradation	2-Phenylacetamide	0.00035504	0.00237842	6.77551	6.77551	H36 up vs H0
N-Acetylmethionine	191.062	6.43037	C7H13NO3S	0	0	N-Acetylmethionine	0.000180568	0.00141582	36.3766	36.3766	H36 up vs H0
Pyridine	79.0421	7.2654	C5H5N	0	0	Pyridine	0.000144779	0.00124872	0.197936	-5.05213	H36 down vs H0
5-Hydroxypentanoate	118.063	7.35762	C5H10O3	Lipids: Fatty Acyls	Fatty Acids and Conjugates	5-Hydroxypentanoate	5.3753e-05	0.000662313	16.8579	16.8579	H36 up vs H0
(S)-Methylmalonate semialdehyde	102.032	7.36099	C4H6O3	Amino Acid Metabolism	Valine, leucine and isoleucine degradat	2-Oxobutanoate	0.000926284	0.00511309	5.26098	5.26098	H36 up vs H0
Ile-Val-Gly-Pro	384.238	7.36241	C18H32N4O5	Peptide(tetra-)	Hydrophobic peptide	Ala-Val-Val-Pro	8.39462e-07	4.51771e-05	13053.4	13053.4	H36 up vs H0
Ala-Leu-Pro-Ser	386.216	7.36565	C17H30N4O6	Peptide(tetra-)	Hydrophobic peptide	2-Phenylacetamide	0.00650689	0.0238817	57.5424	57.5424	H36 up vs H0
2-hydroxy-4-methylthiobutanoate	150.035	7.36713	C5H10O3S	0	dimethylsulfoniopropionate biosynthesis	5-Hydroxypentanoate	1.60954e-06	7.32072e-05	890.375	890.375	H36 up vs H0
Val-Val-Ala	287.185	7.36955	C13H25N3O4	Peptide(tri-)	Hydrophobic peptide	Leu-Val-Gly	4.89329e-05	0.000649302	503.673	503.673	H36 up vs H0
Methohexital	262.132	7.3698	C14H18N2O3	Xenobiotics Drugs etc	0	Leu-Pro	2.00749e-07	1.38517e-05	956.752	956.752	H36 up vs H0
Ile-Tyr	294.158	7.37108	C15H22N2O4	Peptide(di-)	Hydrophobic peptide	Leu-Tyr	0.0146635	0.0443765	21.8804	21.8804	H36 up vs H0
Albine	232.158	7.37189	C14H20N2O	0	0	Albine	1.91982e-07	1.38517e-05	119.899	119.899	H36 up vs H0
[FA methyl,hydroxy(5:0)] 3R-methyl-3,5-dihydroxy-pentanoic acid	148.074	7.37237	C6H12O4	Lipids: Fatty Acyls	Fatty Acids and Conjugates	[FA methyl,hydroxy(5:0)] 3R-methyl-3,5-	0.000104169	0.00108825	4.5095	4.5095	H36 up vs H0
Carbetamide	236.116	7.37293	C12H16N2O3	0	0	Phe-Ala	0.00012163	0.00116562	827.41	827.41	H36 up vs H0
Girgensonine	216.126	7.37424	C13H16N2O	0	0	Agroclavine	7.39808e-08	8.6142e-06	297.623	297.623	H36 up vs H0
1-Pyrroline	69.0579	7.37523	C4H7N	Amino Acid Metabolism	Arginine and proline metabolism	1-Pyrroline	0.00547123	0.0207426	2.99233	2.99233	H36 up vs H0
Leu-Thr	232.142	7.37692	C10H20N2O4	Peptide(di-)	Hydrophobic peptide	Leu-Val-Gly	4.87835e-05	0.000649302	286.668	286.668	H36 up vs H0
[FA hydroxy(2:0/2:0)] 9S,15S-dihydroxy-11R,18-diacetoxy-5Z,13E-prostadienoic acid	454.257	7.37848	C24H38O8	Lipids: Fatty Acyls	Eicosanoids	Agroclavine	1.78998e-05	0.000343079	77.5691	77.5691	H36 up vs H0
Porphobilinogen	226.095	7.38299	C10H14N2O4	Metabolism of Cofactors and Vitamins	Porphyrin and chlorophyll metabolism	Agroclavine	2.82989e-06	9.21508e-05	263.055	263.055	H36 up vs H0
Piperidine	85.0891	7.38353	C5H11N	0	piperine biosynthesis	1-Pyrroline	4.68977e-05	0.000647189	2.96843	2.96843	H36 up vs H0
5,6-Dihydrothymine	128.059	7.38916	C5H8N2O2	Nucleotide Metabolism	Pyrimidine metabolism	Agroclavine	7.78718e-06	0.000191898	64.608	64.608	H36 up vs H0
Thymine	126.043	7.39422	C5H6N2O2	Nucleotide Metabolism	Pyrimidine metabolism	Thymine	1.99517e-07	1.38517e-05	0.148267	-6.74457	H36 down vs H0
Val-Asp-Pro	329.159	7.39658	C14H23N3O6	Peptide(tri-)	Hydrophobic peptide	Leu-Val-Gly	0.00141749	0.00698622	114.684	114.684	H36 up vs H0
Dethiobiotin	214.132	7.39823	C10H18N2O3	Metabolism of Cofactors and Vitamins	Biotin metabolism	Leu-Pro	0.00394542	0.0155562	4.27796	4.27796	H36 up vs H0
3-Amino-2-piperidone	114.079	7.39944	C5H10N2O	0	0	Agroclavine	1.2965e-07	1.27797e-05	124.636	124.636	H36 up vs H0
Ala-Tyr	252.111	7.40651	C12H16N2O4	Peptide(di-)	Hydrophobic peptide	Phe-Ala	3.3606e-06	0.000100818	322.855	322.855	H36 up vs H0
Met-Pro	246.104	7.42339	C10H18N2O3S	Peptide(di-)	Hydrophobic peptide	Met-Pro	0.000833828	0.00467757	19.8639	19.8639	H36 up vs H0
Thymidine	242.09	7.43035	C10H14N2O5	Nucleotide Metabolism	Pyrimidine metabolism	Thymine	0.0024021	0.0106932	0.025145	-39.7693	H36 down vs H0
beta-Aminopropion aldehyde	73.0527	7.47024	C3H7NO	Amino Acid Metabolism	beta-Alanine metabolism	Agroclavine	0.00012808	0.001177	2.35299	2.35299	H36 up vs H0
3-Indoleacetonitrile	78.0343	7.48668	C10H8N2	Amino Acid Metabolism	Tryptophan metabolism	3-Indoleacetonitrile	0.0056989	0.0213709	0.302752	-3.30303	H36 down vs H0
3-Hydroxypropenoate	88.0161	7.50552	C3H4O3	0	0	3-Oxopropanoate	0.00128465	0.00650588	4.26367	4.26367	H36 up vs H0
Met-Ala	220.088	7.58182	C8H16N2O3S	Peptide(di-)	Hydrophobic peptide	Met-Ala	0.00915067	0.0317285	4.18464	4.18464	H36 up vs H0
4-Hydroxybutanoic acid	104.047	7.74889	C4H8O3	Carbohydrate Metabolism	Butanoate metabolism	4-Hydroxybutanoic acid	5.53653e-05	0.000670211	7.0958	7.0958	H36 up vs H0
N2-(D-1-Carboxyethyl)-L-lysine	218.127	8.08606	C9H18N2O4	Amino Acid Metabolism	Lysine degradation	4-Hydroxybutanoic acid	1.61002e-05	0.000317404	20.4816	20.4816	H36 up vs H0
Justicidin B	364.094	8.34652	C21H16O6	0	0		0.0101221	0.0340695	32.7572	32.7572	H36 up vs H0
Deoxyuridine	228.075	8.45538	C9H12N2O5	Nucleotide Metabolism	Pyrimidine metabolism		7.61144e-05	0.000890151	0.0028882	-346.237	H36 down vs H0
Borreline	266.142	8.63677	C17H18N2O	0	0	Borreline	0.00077805	0.00451138	54.414	54.414	H36 up vs H0
3-Methylbut-2-enal	84.0575	8.66945	C5H8O	Biosynthesis of Secondary Metabolites	Zeatin biosynthesis	Urocanate	0.00055052	0.00336158	0.303836	-3.29125	H36 down vs H0
sorbate	112.052	8.67734	C6H8O2	Lipids: Fatty Acyls	Fatty Acids and Conjugates	Urocanate	0.00178231	0.00848131	0.400236	-2.49852	H36 down vs H0
Maleimide	97.0164	8.68613	C4H3NO2	0	0	Urocanate	0.000871895	0.00485167	0.327607	-3.05244	H36 down vs H0
2-Phenylacetamide	135.068	8.69628	C8H9NO	Amino Acid Metabolism	Phenylalanine metabolism__Styrene degra	2-Phenylacetamide	2.24248e-05	0.000418191	5.64999	5.64999	H36 up vs H0
Brunfelsamidine	109.064	8.72265	C5H7N3	0	0	Brunfelsamidine	0.000193737	0.00148531	3.11977	3.11977	H36 up vs H0
2-amino-4-methylphenol	123.069	8.74454	C7H9NO	0	0	Urocanate	0.00231486	0.0105063	0.391213	-2.55615	H36 down vs H0
Iminoglycine	73.0164	8.74787	C2H3NO2	Metabolism of Cofactors and Vitamins	Thiamine metabolism	Urocanate	0.000832386	0.00467757	0.40337	-2.47911	H36 down vs H0
Trp-Gln-Tyr	495.212	8.78618	C25H29N5O6	Peptide(tri-)	Hydrophobic peptide	Trp-Gln-Tyr	1.11716e-05	0.000247118	443.447	443.447	H36 up vs H0
Ala-Ala-Pro-Tyr	420.2	8.80325	C20H28N4O6	Peptide(tetra-)	Hydrophobic peptide	Ala-Ala-Pro-Tyr	0.000994768	0.00540464	17.9602	17.9602	H36 up vs H0
Asn-Leu-Pro-Ser	429.222	8.83132	C18H31N5O7	Peptide(tetra-)	Hydrophobic peptide	Asn-Leu-Pro-Ser	0.00129175	0.00650588	41.5267	41.5267	H36 up vs H0
1-Methylhypoxanthine	150.054	8.86198	C6H6N4O	0	0	1-Methylhypoxanthine	0.00364454	0.014706	0.0368517	-27.1358	H36 down vs H0
Homocysteinesulfinicacid	167.025	8.94476	C4H9NO4S	0	0	Homocysteinesulfinicacid	0.00205628	0.00958671	2.24172	2.24172	H36 up vs H0
3,5-dihydro-5-methylidene-4H-imidazol-4-one	196.096	8.95221	C8H12N4O2	0	0	1H-Imidazole-4-ethanamine	2.27507e-06	8.2621e-05	116.34	116.34	H36 up vs H0
Asn-Leu-Thr-Pro	443.238	8.97657	C19H33N5O7	Peptide(tetra-)	Hydrophobic peptide	Asn-Leu-Thr-Pro	0.0133606	0.0411554	16.4294	16.4294	H36 up vs H0
3-(4-Hydroxyphenyl)lactate	182.058	8.99505	C9H10O4	Amino Acid Metabolism	Tyrosine metabolism	3-(4-Hydroxyphenyl)lactate	0.0153091	0.0459274	2.53644	2.53644	H36 up vs H0
Leu-Asn	245.138	9.00006	C10H19N3O4	Peptide(di-)	Hydrophobic peptide	Leu-Asn	0.000442507	0.00285355	5.07985	5.07985	H36 up vs H0
1H-Imidazole-4-ethanamine	111.08	9.0181	C5H9N3	Amino Acid Metabolism	Histidine metabolism	1H-Imidazole-4-ethanamine	1.88992e-06	7.67085e-05	74.8596	74.8596	H36 up vs H0
Met-Ser	236.083	9.07876	C8H16N2O4S	Peptide(di-)	Hydrophobic peptide	Leu-Asn	0.000121415	0.00116562	30.7719	30.7719	H36 up vs H0
Tauropine	197.036	9.08712	C5H11NO5S	0	0	Tauropine	8.51163e-07	4.51771e-05	27.4971	27.4971	H36 up vs H0
Thr-Tyr	282.122	9.09013	C13H18N2O5	Peptide(di-)	Hydrophobic peptide	Thr-Tyr	0.000276026	0.00202615	70.8429	70.8429	H36 up vs H0
Hexazinone	126.079	9.12866	C12H20N4O2	0	0	Hexazinone	2.93814e-06	9.21508e-05	8.64131	8.64131	H36 up vs H0
Lys-Phe-Cys	396.183	9.23143	C18H28N4O4S	Peptide(tri-)	Basic peptide	Lys-Phe-Cys	0.00191843	0.00900488	191.118	191.118	H36 up vs H0
Adenine	135.054	9.25319	C5H5N5	Nucleotide Metabolism	Purine metabolism__Zeatin biosynthesis	Adenine	2.71338e-06	9.21508e-05	0.0705295	-14.1785	H36 down vs H0
(R)-3-Hydroxybutanoate	104.047	9.25613	C4H8O3	Lipid Metabolism	Synthesis and degradation of ketone bod	(R)-3-Hydroxybutanoate	0.00323101	0.0133345	3.14927	3.14927	H36 up vs H0
Glu-Leu-Leu-Gln	501.28	9.26838	C22H39N5O8	Peptide(tetra-)	Hydrophobic peptide	Ala-Phe-Val-Asp	0.00734514	0.0265348	17.2602	17.2602	H36 up vs H0
Leu-Gln-Ser	346.185	9.30897	C14H26N4O6	Peptide(tri-)	Hydrophobic peptide	Leu-Gln-Ser	0.00113909	0.00599981	65.5269	65.5269	H36 up vs H0
Asp-Leu-Leu-Gln	487.265	9.31154	C21H37N5O8	Peptide(tetra-)	Hydrophobic peptide	Ala-Phe-Thr-Gln	0.00533755	0.0203476	42.8522	42.8522	H36 up vs H0
6-Hydroxy-5-methoxyindoleglucuronide	339.096	9.37483	C15H17NO8	0	0	6-Hydroxy-5-methoxyindoleglucuronide	9.62355e-05	0.00105401	33.0959	33.0959	H36 up vs H0
5-Methylcytosine	125.059	9.37639	C5H7N3O	Nucleotide Metabolism	Pyrimidine metabolism	5-Methylcytosine	0.00232215	0.0105063	0.035506	-28.1642	H36 down vs H0
Ala-Leu-Ser-Ser	376.196	9.41632	C15H28N4O7	Peptide(tetra-)	Hydrophobic peptide	Ala-Leu-Ser-Ser	5.24683e-10	1.20677e-07	2095.31	2095.31	H36 up vs H0
3',5'-Cyclic AMP	329.053	9.43961	C10H12N5O6P	Nucleotide Metabolism	Purine metabolism	3',5'-Cyclic AMP	3.08919e-05	0.000470337	0.00182887	-546.786	H36 down vs H0
N6-Acetyl-N6-hydroxy-L-lysine	204.111	9.47185	C8H16N2O4	Amino Acid Metabolism	Lysine degradation	Dihydroclavaminic acid	0.0102625	0.0343743	3.19197	3.19197	H36 up vs H0
Trp-Ala-Gly	166.074	9.50277	C16H20N4O4	Peptide(tri-)	Hydrophobic peptide	Trp-Ala-Gly	0.00278598	0.0118662	0.0252463	-39.6098	H36 down vs H0
5,6-Dihydroxyindole	149.048	9.51234	C8H7NO2	Amino Acid Metabolism	Tyrosine metabolism	Aniline	0.00252941	0.0110461	0.151773	-6.58879	H36 down vs H0
D-Proline	115.063	9.51982	C5H9NO2	Amino Acid Metabolism	Arginine and proline metabolism	D-Proline	0.000637678	0.00382607	2.53448	2.53448	H36 up vs H0
Val-Gly-Pro	271.153	9.58578	C12H21N3O4	Peptide(tri-)	Hydrophobic peptide	Val-Gly-Pro	3.1193e-05	0.000470337	406.395	406.395	H36 up vs H0
(R)-Lactate	90.0318	9.59438	C3H6O3	Carbohydrate Metabolism	Pyruvate metabolism	(R)-Lactate	7.49061e-08	8.6142e-06	41.6591	41.6591	H36 up vs H0
Nicotyrine	158.084	9.6005	C10H10N2	0	0	Nicotyrine	0.00590782	0.0220346	5.2153	5.2153	H36 up vs H0
N-Benzylformamide	135.068	9.75462	C8H9NO	0	0	2-Phenylacetamide	0.000136342	0.0012061	3.50262	3.50262	H36 up vs H0
Glu-Gln-Pro-Tyr	535.228	9.8033	C24H33N5O9	Peptide(tetra-)	Hydrophobic peptide		0.00245775	0.0108708	64.3424	64.3424	H36 up vs H0
Creatinine	113.059	9.81468	C4H7N3O	Amino Acid Metabolism	Arginine and proline metabolism	Creatinine	0.000315556	0.00217733	0.461415	-2.16725	H36 down vs H0
Pyrazinamide	123.043	9.8343	C5H5N3O	0	0	Creatinine	0.0128182	0.0397287	0.451351	-2.21557	H36 down vs H0
7-Methylxanthine	166.049	9.85362	C6H6N4O2	Biosynthesis of Secondary Metabolites	Caffeine metabolism	Creatinine	0.0116733	0.0381734	0.421258	-2.37384	H36 down vs H0
dTTP	240.995	9.86217	C10H17N2O14P3	Nucleotide Metabolism	Pyrimidine metabolism	dTTP	0.00367085	0.0147261	0.323222	-3.09385	H36 down vs H0
3-Methylguanine	165.065	9.92423	C6H7N5O	0	0	Orotate(Fragment)	0.000131338	0.001177	0.171017	-5.84736	H36 down vs H0
Ala-Gly-Tyr	309.133	9.94144	C14H19N3O5	Peptide(tri-)	Hydrophobic peptide	Ala-Gly-Tyr	0.00157287	0.00758938	68.9455	68.9455	H36 up vs H0
Uridine	244.07	9.954	C9H12N2O6	Nucleotide Metabolism	Pyrimidine metabolism	Uridine	2.74803e-05	0.0004535	0.0113247	-88.3028	H36 down vs H0
Orotate(Fragment)	112.027	9.96334	C4H4N2O2	Nucleotide Metabolism	Pyrimidine metabolism	Orotate(Fragment)	1.99152e-09	3.43537e-07	0.0677712	-14.7555	H36 down vs H0
L-1-Pyrroline-3-hydroxy-5-carboxylate	129.043	10.0297	C5H7NO3	Amino Acid Metabolism	Arginine and proline metabolism	L-1-Pyrroline-3-hydroxy-5-carboxylate	0.000736858	0.00434557	3.37666	3.37666	H36 up vs H0
L-Arabinose	150.053	10.0863	C5H10O5	Carbohydrate Metabolism	Pentose and glucuronate interconversion	D-Xylulose	0.0044618	0.0173364	2.49883	2.49883	H36 up vs H0
L-Phenylalanine	165.079	10.1095	C9H11NO2	Amino Acid Metabolism	Phenylalanine metabolism__Phenylalanine	L-Phenylalanine	0.000232602	0.00172575	8.18319	8.18319	H36 up vs H0
5-6-Dihydrouridine	246.085	10.122	C9H14N2O6	0	0	5-6-Dihydrouridine	0.00608772	0.0224627	0.306144	-3.26644	H36 down vs H0
N-Acetylornithine	174.1	10.1482	C7H14N2O3	Amino Acid Metabolism	Arginine and proline metabolism	N-Acetylornithine	0.000165641	0.00134462	196.781	196.781	H36 up vs H0
Ala-Leu-Asp-Ser	404.191	10.1537	C16H28N4O8	Peptide(tetra-)	Hydrophobic peptide	Ala-Leu-Asp-Ser	0.000949644	0.00520043	96.4365	96.4365	H36 up vs H0
Ala-Thr-Thr-Tyr	454.207	10.1581	C20H30N4O8	Peptide(tetra-)	Hydrophobic peptide	Ala-Thr-Thr-Tyr	0.00173997	0.00833737	67.1523	67.1523	H36 up vs H0
N-Acetylputrescine	130.111	10.2028	C6H14N2O	Amino Acid Metabolism	Arginine and proline metabolism	N-Acetylputrescine	0.00769518	0.0275113	0.344604	-2.90188	H36 down vs H0
4-Aminobutanal	87.0684	10.2047	C4H9NO	Amino Acid Metabolism	Arginine and proline metabolism__beta-A	N-Acetylputrescine	0.00361231	0.0146617	0.35521	-2.81523	H36 down vs H0
Leu-Val-Asp	345.19	10.2162	C15H27N3O6	Peptide(tri-)	Hydrophobic peptide	Leu-Val-Asp	8.65501e-05	0.000995326	94.4202	94.4202	H36 up vs H0
indigo	131.037	10.2288	C16H10N2O2	0	indigo biosynthesis	indigo	0.0170037	0.0495044	0.445556	-2.24439	H36 down vs H0
Actinidine	147.105	10.3051	C10H13N	0	0	Actinidine	0.00816338	0.0287384	0.111676	-8.9545	H36 down vs H0
2-Oxoglutaramate	145.038	10.3182	C5H7NO4	Amino Acid Metabolism	Glutamate metabolism	2-Oxoglutaramate	0.000149999	0.00127777	6.51325	6.51325	H36 up vs H0
Glycerol	92.0474	10.3432	C3H8O3	Carbohydrate Metabolism	Galactose metabolism__Glycerolipid meta	Glycerol	0.010698	0.03566	2.11626	2.11626	H36 up vs H0
Deoxycytidine	227.091	10.3573	C9H13N3O4	Nucleotide Metabolism	Pyrimidine metabolism	Deoxycytidine	1.53289e-11	1.0577e-08	0.00086564	-1155.21	H36 down vs H0
D-Glutamate	147.053	10.3619	C5H9NO4	Amino Acid Metabolism	Glutamate metabolism__D-Glutamine and D	D-Glutamate	0.0101071	0.0340695	2.41379	2.41379	H36 up vs H0
5-Hydroxytryptophol	177.079	10.3741	C10H11NO2	0	0	5-Hydroxytryptophol	0.0119151	0.0387804	0.358058	-2.79285	H36 down vs H0
Ser-Tyr	268.106	10.3916	C12H16N2O5	Peptide(di-)	Hydrophobic peptide	Ser-Tyr	3.13558e-05	0.000470337	32.8634	32.8634	H36 up vs H0
2-O-Methylcytosine	125.059	10.4791	C5H7N3O	0	0	5-Methylcytosine	0.000127882	0.001177	0.0392643	-25.4684	H36 down vs H0
Ala-His	226.107	10.5166	C9H14N4O3	Peptide(di-)	Basic peptide	Carnosine	0.000179243	0.00141582	74.865	74.865	H36 up vs H0
L-3-Amino-isobutanoate	103.063	10.5521	C4H9NO2	Amino Acid Metabolism	Valine, leucine and isoleucine degradat	Arg-Thr-Ser-Tyr	0.000187876	0.00145656	4.68614	4.68614	H36 up vs H0
Stachydrine	143.094	10.6268	C7H13NO2	0	stachydrine degradation	3-Butynoate	0.000512358	0.00318514	0.230336	-4.34148	H36 down vs H0
[FA dioxo(8:0)] 4,7-dioxo-octanoic acid	172.074	10.6448	C8H12O4	Lipids: Fatty Acyls	Fatty Acids and Conjugates	[FA dioxo(8:0)] 4,7-dioxo-octanoic acid	0.00269433	0.0116193	0.489581	-2.04256	H36 down vs H0
N-Acetyl-D-fucosamine	205.095	10.6515	C8H15NO5	0	0	(S)-Dihydroorotate	0.00011026	0.00109388	0.201987	-4.9508	H36 down vs H0
3-Butynoate	84.0211	10.67	C4H4O2	Carbohydrate Metabolism	Butanoate metabolism	3-Butynoate	0.001402	0.00695959	0.243033	-4.11467	H36 down vs H0
Asn-Tyr	295.117	10.6858	C13H17N3O5	Peptide(di-)	Hydrophobic peptide	Asn-Tyr	0.00082333	0.00467757	40.7611	40.7611	H36 up vs H0
N-Formimino-L-glutamate	174.064	10.6887	C6H10N2O4	Amino Acid Metabolism	Histidine metabolism	N-Formimino-L-glutamate	0.0152928	0.0459274	4.09405	4.09405	H36 up vs H0
2-methylbutyronitrile	83.0735	10.7237	C5H9N	0	lotaustralin biosynthesis __ superpathw	Piperideine	0.000156464	0.00130072	0.490528	-2.03862	H36 down vs H0
Glu-Leu	260.137	10.7646	C11H20N2O5	Peptide(di-)	Hydrophobic peptide	Glu-Leu	0.000109478	0.00109388	10.8888	10.8888	H36 up vs H0
Maleamate	115.027	10.8227	C4H5NO3	Metabolism of Cofactors and Vitamins	Nicotinate and nicotinamide metabolism	Maleamate	0.000556078	0.00336574	0.168068	-5.94998	H36 down vs H0
Ala-Leu-Ala-Asp	388.196	10.882	C16H28N4O7	Peptide(tetra-)	Hydrophobic peptide	Asp-Leu-Gln-Pro	0.0124613	0.0393459	11.4516	11.4516	H36 up vs H0
Asp-Leu-Gln-Pro	471.233	10.8938	C20H33N5O8	Peptide(tetra-)	Hydrophobic peptide	Asp-Leu-Gln-Pro	0.000826931	0.00467757	95.5975	95.5975	H36 up vs H0
D-2-Amino-hexano-6-lactam	128.095	10.9558	C6H12N2O	0	0	L-Lysine 1,6-lactam	2.7192e-05	0.0004535	4.68423	4.68423	H36 up vs H0
citraconate	130.027	10.9653	C5H6O4	Amino Acid Metabolism	Valine, leucine and isoleucine biosynth	2,5-Dioxopentanoate	0.00148263	0.00725542	0.172946	-5.78214	H36 down vs H0
Leu-Asp-Gln	374.18	10.9675	C15H26N4O7	Peptide(tri-)	Hydrophobic peptide	Leu-Asp-Gln	0.0012199	0.00628859	24.1028	24.1028	H36 up vs H0
L-Methionine	149.051	11.0541	C5H11NO2S	Amino Acid Metabolism	Methionine metabolism	L-Methionine	0.0110796	0.0367546	2.71754	2.71754	H36 up vs H0
Indole	117.058	11.0869	C8H7N	Amino Acid Metabolism	Tryptophan metabolism__Phenylalanine, t	Indole	0.0155327	0.0463965	3.33543	3.33543	H36 up vs H0
Phe-Arg	321.18	11.1229	C15H23N5O3	Peptide(di-)	Basic peptide	Phe-Arg	5.22455e-05	0.000655444	82.6826	82.6826	H36 up vs H0
O-Acetyl-L-homoserine	161.069	11.1443	C6H11NO4	Amino Acid Metabolism	Methionine metabolism__Sulfur metabolis	L-2-Aminoadipate	0.00278209	0.0118662	0.437004	-2.28831	H36 down vs H0
N-Acetyl-L-citrulline	217.106	11.1808	C8H15N3O4	Amino Acid Metabolism	arginine biosynthesis III	Ala-Ala-Ser	1.69756e-06	7.32072e-05	128.568	128.568	H36 up vs H0
DL-Methionine sulfone	181.041	11.1811	C5H11NO4S	0	0	DL-Methionine sulfone	0.0168956	0.0493982	0.201316	-4.96732	H36 down vs H0
Asp-Leu-Gln-Gln	502.239	11.2002	C20H34N6O9	Peptide(tetra-)	Hydrophobic peptide	Asp-Leu-Gln-Gln	7.17307e-06	0.000188516	791.911	791.911	H36 up vs H0
Ala-Asn	203.091	11.2059	C7H13N3O4	Peptide(di-)	Polar peptide	Ala-Asn	0.00032164	0.00219734	86.9156	86.9156	H36 up vs H0
Ala-Gly-His	283.128	11.222	C11H17N5O4	Peptide(tri-)	Basic peptide	Ala-Gly-His	0.000228801	0.00171601	38.5744	38.5744	H36 up vs H0
3-Methyleneoxindole	145.053	11.2631	C9H7NO	0	0	Chrysene	0.00678265	0.0246317	3.62677	3.62677	H36 up vs H0
L-Erythrulose	120.042	11.2642	C4H8O4	Carbohydrate Metabolism	0	L-Azetidine 2-carboxylic acid	0.000426915	0.00277897	0.152676	-6.5498	H36 down vs H0
2-Naphthylamine	143.073	11.2664	C10H9N	0	0	Chrysene	0.00076655	0.00448237	30.7769	30.7769	H36 up vs H0
L-Asparagine	132.053	11.2687	C4H8N2O3	Amino Acid Metabolism	Alanine and aspartate metabolism__Tetra	L-Tryptophan	2.65982e-05	0.0004535	9.9534	9.9534	H36 up vs H0
L-Tryptophan	204.09	11.2706	C11H12N2O2	Amino Acid Metabolism	Tryptophan metabolism__Phenylalanine, t	L-Tryptophan	0.00840988	0.0294559	4.52899	4.52899	H36 up vs H0
D-Alanine	89.0477	11.2743	C3H7NO2	Amino Acid Metabolism	Alanine and aspartate metabolism__D-Ala	D-Alanine	3.3115e-05	0.000486156	8.69109	8.69109	H36 up vs H0
3-Methylene-indolenine	129.058	11.2923	C9H7N	0	0	Chrysene	0.000420245	0.00276161	3.85486	3.85486	H36 up vs H0
2-Aminophenol	109.053	11.2954	C6H7NO	Amino Acid Metabolism	Tryptophan metabolism__Naphthalene and	2-Hydroxypyridine	0.00010567	0.00108825	0.362089	-2.76175	H36 down vs H0
Thr-Ser	206.09	11.2961	C7H14N2O5	Peptide(di-)	Polar peptide	L-Tryptophan	0.00233471	0.0105063	14.9491	14.9491	H36 up vs H0
2-Aminoacrylate	87.0321	11.2968	C3H5NO2	Amino Acid Metabolism	Cysteine metabolism	L-Azetidine 2-carboxylic acid	0.00217249	0.0100605	0.264538	-3.78018	H36 down vs H0
Vinylacetylglycine	143.058	11.3014	C6H9NO3	0	0	2-Hydroxypyridine	0.0162315	0.0480675	0.477962	-2.09222	H36 down vs H0
2-Aminomuconate semialdehyde	141.043	11.3053	C6H7NO3	Amino Acid Metabolism	Tryptophan metabolism__Naphthalene and	L-Azetidine 2-carboxylic acid	0.00302044	0.012631	0.199039	-5.02415	H36 down vs H0
crotonaldehyde	70.0419	11.3118	C4H6O	0	0	2-Hydroxypyridine	0.00153907	0.00747856	0.394273	-2.53632	H36 down vs H0
Gly-Ser	162.064	11.3256	C5H10N2O4	Peptide(di-)	Polar peptide	L-Tryptophan	0.000698359	0.00415403	40.5045	40.5045	H36 up vs H0
Leu-Lys-Thr	360.238	11.3486	C16H32N4O5	Peptide(tri-)	Basic peptide	Leu-Lys-Thr	0.00858925	0.0299322	27.9761	27.9761	H36 up vs H0
L-proline amide	114.079	11.4209	C5H10N2O	0	0	L-proline amide	0.000127902	0.001177	4.76869	4.76869	H36 up vs H0
Leu-Arg	287.196	11.4598	C12H25N5O3	Peptide(di-)	Basic peptide	Glu-Val	0.000291907	0.0021001	18.6018	18.6018	H36 up vs H0
Cytosine	111.043	11.4606	C4H5N3O	Nucleotide Metabolism	Pyrimidine metabolism	Cytosine	0.00250845	0.0110244	0.360234	-2.77598	H36 down vs H0
Glycylproline	172.085	11.5179	C7H12N2O3	Peptide(di-)	Polar peptide	Glycylproline	0.00665835	0.0243083	12.6719	12.6719	H36 up vs H0
1-O-methyl-&beta;-D-glucuronate	208.058	11.5731	C7H12O7	0	0	1-O-methyl-&beta;-D-glucuronate	0.000153103	0.0012883	8.7452	8.7452	H36 up vs H0
Ala-Asn-Gly	260.112	11.8062	C9H16N4O5	Peptide(tri-)	Polar peptide	Ala-Asn-Gly	0.00016303	0.00133918	104.196	104.196	H36 up vs H0
Ala-Gly-Ser	233.101	11.8617	C8H15N3O5	Peptide(tri-)	Polar peptide	Ala-Gly-Ser	0.00796051	0.0281679	20.1751	20.1751	H36 up vs H0
Ala-Ser	176.08	11.9132	C6H12N2O4	Peptide(di-)	Polar peptide	Ala-Ser	1.36702e-05	0.000285831	404.572	404.572	H36 up vs H0
L-Proline	115.063	11.9384	C5H9NO2	Amino Acid Metabolism	Arginine and proline metabolism__Novobi	L-Proline	0.00436733	0.0171219	2.64249	2.64249	H36 up vs H0
Ser-Ser	192.075	11.9644	C6H12N2O5	Peptide(di-)	Polar peptide	Ser-Ser	0.000307613	0.00216585	41.4215	41.4215	H36 up vs H0
Isobutyronitrile	69.0579	11.9746	C4H7N	0	superpathway of linamarin and lotaustra	Isobutyronitrile	0.00937468	0.0321817	2.16993	2.16993	H36 up vs H0
3-Amino-3-(4-hydroxyphenyl)propanoate	181.074	12.0093	C9H11NO3	Amino Acid Metabolism	Tyrosine metabolism	3-Amino-3-(4-hydroxyphenyl)propanoate	0.000314506	0.00217733	9.64925	9.64925	H36 up vs H0
(R)-piperidine-3-carboxamide	128.095	12.0524	C6H12N2O	0	0		5.15585e-05	0.000655444	4.28215	4.28215	H36 up vs H0
enol-Phenylpyruvate	164.047	12.1461	C9H8O3	Amino Acid Metabolism	Phenylalanine metabolism		0.000512392	0.00318514	57.6317	57.6317	H36 up vs H0
O-Succinyl-L-homoserine	219.074	12.1724	C8H13NO6	Amino Acid Metabolism	Methionine metabolism__Sulfur metabolis	myo-Inositol	0.00131784	0.0065892	110.132	110.132	H36 up vs H0
N-Methyl-2-pyrrolidinone	99.0684	12.1927	C5H9NO	0	0	3-Butynoate	0.0125706	0.0393459	0.441447	-2.26528	H36 down vs H0
Val-Arg	273.18	12.241	C11H23N5O3	Peptide(di-)	Basic peptide	Val-Arg	6.21119e-07	3.89611e-05	603.407	603.407	H36 up vs H0
N-Acetyl-L-glutamate	189.064	12.2836	C7H11NO5	Amino Acid Metabolism	Arginine and proline metabolism	N-Acetyl-L-glutamate	0.000101486	0.00108825	11.419	11.419	H36 up vs H0
3-sulfopropanal	137.999	12.287	C3H6O4S	0	0	3-sulfopropanal	7.54204e-05	0.000890151	50.2297	50.2297	H36 up vs H0
2-Acetolactate	132.042	12.5132	C5H8O4	Carbohydrate Metabolism	Butanoate metabolism__Pantothenate and	2-Acetolactate	0.00758715	0.0272663	0.387008	-2.58392	H36 down vs H0
N-Acetyl-L-aspartate	175.048	12.6099	C6H9NO5	Amino Acid Metabolism	Alanine and aspartate metabolism	N-Acetyl-L-aspartate	3.27663e-11	1.13044e-08	18419.3	18419.3	H36 up vs H0
N,N-Dimethylglycine	103.063	12.6299	C4H9NO2	Amino Acid Metabolism	Glycine, serine and threonine metabolis	N,N-Dimethylglycine	0.0128398	0.0397287	0.364571	-2.74295	H36 down vs H0
Lys-Val-Ser	332.206	12.6598	C14H28N4O5	Peptide(tri-)	Basic peptide	Lys-Val-Ser	2.76044e-05	0.0004535	431.009	431.009	H36 up vs H0
2-deoxyglucose-6-phosphate	246.051	12.6923	C6H15O8P	0	0	Glycerophosphoglycerol	0.00111661	0.00597099	4.23653	4.23653	H36 up vs H0
Lys-Val	245.174	12.7252	C11H23N3O3	Peptide(di-)	Basic peptide	Lys-Val	0.00324665	0.0133345	134.417	134.417	H36 up vs H0
L-Glutamate	147.053	12.7927	C5H9NO4	Amino Acid Metabolism	Arginine and proline metabolism__Glutam	L-Glutamate	0.0159412	0.0474115	0.399968	-2.5002	H36 down vs H0
Phosphocreatine	211.036	12.8242	C4H10N3O5P	Amino Acid Metabolism	Arginine and proline metabolism		0.00264746	0.011489	0.00417526	-239.506	H36 down vs H0
3-Methylcytosine	125.059	12.9757	C5H7N3O	0	0	5-Methylcytosine	5.1949e-05	0.000655444	0.0210547	-47.4953	H36 down vs H0
D-Aspartate	133.037	12.9952	C4H7NO4	Amino Acid Metabolism	Alanine and aspartate metabolism	D-Aspartate	0.00786466	0.0279722	0.215792	-4.6341	H36 down vs H0
2-Butenoate	86.0368	13.0081	C4H6O2	Lipids: Fatty Acyls	Fatty Acids and Conjugates	2-Butenoate	0.0112505	0.0371429	2.20429	2.20429	H36 up vs H0
L-Glutamine	146.069	13.1334	C5H10N2O3	Amino Acid Metabolism	Glutamate metabolism__Purine metabolism	beta-Alanine	0.000548617	0.00336158	0.183586	-5.44704	H36 down vs H0
7-Methyladenine	149.07	13.1708	C6H7N5	Nucleotide Metabolism	BaseExcisionRepair	7-Methyladenine	0.000110973	0.00109388	0.10827	-9.23619	H36 down vs H0
L-Lysine 1,6-lactam	128.095	13.3074	C6H12N2O	Amino Acid Metabolism	0	L-Lysine 1,6-lactam	3.45853e-05	0.000487017	5.55581	5.55581	H36 up vs H0
beta-Citryl-L-glutamic acid	321.07	15.8072	C11H15NO10	0	0	beta-Citryl-L-glutamic acid	0.00280627	0.0118793	0.230052	-4.34685	H36 down vs H0
N6-Hydroxy-L-lysine	162.1	18.0923	C6H14N2O3	Amino Acid Metabolism	Lysine degradation	N6-Hydroxy-L-lysine	0.00923838	0.0318724	0.345021	-2.89837	H36 down vs H0
N6-Methyl-L-lysine	160.121	18.6412	C7H16N2O2	Amino Acid Metabolism	0	N6-Methyl-L-lysine	0.00955453	0.032476	0.464761	-2.15164	H36 down vs H0

## Sheet: 42-hour
Putative Metabolites	Mass	RT	FORMULA	Map	Pathway	BP	p-value(H42 vs. H0)	FDR-stepup (p-value(H42 vs. H0))	Ratio(H42 vs. H0)	Fold-Change(H42 vs. H0)	Fold-Change(H42 vs. H0) (Description)
Cholesterolsulfate	466.312	3.43229	C27H46O4S	Lipids: Sterol lipids	0	Cholesterolsulfate	8.49248e-05	0.000552812	2.85597	2.85597	H42 up vs H0
5-O-Methylembelin	308.199	3.58755	C18H28O4	0	0	5-O-Methylembelin	0.000420168	0.00180072	467.03	467.03	H42 up vs H0
[FA (7:1)] 2-heptenal	112.089	3.79275	C7H12O	Lipids: Fatty Acyls	Fatty aldehydes	Alizarin	0.000212966	0.00109475	0.494941	-2.02044	H42 down vs H0
[PE (18:1/18:1)] 1-(1Z-octadecenyl)-2-(9Z-octadecenoyl)-sn-glycero-3-phosphoethanolamine	729.567	3.85028	C41H80NO7P	Lipids: Glycerophospholipids	Glycerophosphoethanolamines	[PE (18:1/18:1)] 1-(1Z-octadecenyl)-2-(	2.41485e-07	8.14961e-06	851.397	851.397	H42 up vs H0
butylene	70.0783	3.98274	C5H10	0	0	butylene	0.00256119	0.00772383	0.451546	-2.21461	H42 down vs H0
[ST hydrox] N-(3alpha,7alpha-dihydroxy-5beta-cholan-24-oyl)-taurine	499.297	4.03211	C26H45NO6S	Lipids: Sterol lipids	Bile acid biosynthesis	[ST hydrox] N-(3alpha,7alpha-dihydroxy-	1.93231e-05	0.000168771	641.894	641.894	H42 up vs H0
[FA methyl(5:1/5:2/8:0)] methyl 8-[3,5-epidioxy-2-(3-hydroperoxy-1-pentenyl)-cyclopentyl]-octanoate	396.251	4.04752	C22H36O6	Lipids: Fatty Acyls	Fatty Acids and Conjugates	[FA methyl(5:1/5:2/8:0)] methyl 8-[3,5-	0.00760909	0.0195906	0.483603	-2.06781	H42 down vs H0
4-Hydroxyphenylacetaldehyde	136.052	4.06773	C8H8O2	Amino Acid Metabolism	Tyrosine metabolism__Alkaloid biosynthe		0.00184678	0.00581862	0.00426465	-234.486	H42 down vs H0
Phe-Phe	312.147	4.16124	C18H20N2O3	Peptide(di-)	Hydrophobic peptide		7.22548e-07	1.61395e-05	9782.72	9782.72	H42 up vs H0
Avenacoside A	531.261	4.19918	C51H82O23	0	0	Avenacoside A	5.40601e-07	1.38154e-05	2220.82	2220.82	H42 up vs H0
Leu-Leu-Val	343.247	4.2057	C17H33N3O4	Peptide(tri-)	Hydrophobic peptide	Leu-Leu-Val	1.47839e-05	0.000137813	41.8559	41.8559	H42 up vs H0
Bendiocarb	223.085	4.26457	C11H13NO4	0	0	Bendiocarb	0.0131496	0.0307568	0.0727372	-13.7481	H42 down vs H0
[FA (9:2)] 2,6-nonadienoic acid	154.099	4.32364	C9H14O2	Lipids: Fatty Acyls	Fatty Acids and Conjugates	[FA (9:2)] 2,6-nonadienoic acid	0.00145994	0.00484307	0.0106985	-93.4714	H42 down vs H0
Leu-Phe	278.163	4.34194	C15H22N2O3	Peptide(di-)	Hydrophobic peptide		1.63718e-05	0.000146708	213.648	213.648	H42 up vs H0
Glycodeoxycholate	449.314	4.46064	C26H43NO5	Lipid Metabolism	Bile acid biosynthesis	Glycodeoxycholate	0.000202154	0.00106069	16.3765	16.3765	H42 up vs H0
[ST hydrox] 3alpha,7alpha-Dihydroxy-5beta-cholan-24-oic Acid	392.293	4.49379	C24H40O4	Lipids: Sterol lipids	Bile acids and derivatives	Ala-Ala-Asp-Arg	0.000139595	0.000816273	159.471	159.471	H42 up vs H0
Quinolin-2-ol	145.053	4.52618	C9H7NO	0	0	Agroclavine	0.0108116	0.0263603	2.90228	2.90228	H42 up vs H0
[PE (18:1)] 1-(9Z-octadecenoyl)-sn-glycero-3-phosphoethanolamine	479.301	4.55086	C23H46NO7P	Lipids: Glycerophospholipids	Glycerophosphoethanolamines	Arg-Leu-Phe-Phe	0.0225584	0.048041	0.392587	-2.54721	H42 down vs H0
Leucyl-leucine	244.179	4.56417	C12H24N2O3	Peptide(di-)	Hydrophobic peptide	Ile-Val-Pro-Tyr	0.000263507	0.00128042	17.1323	17.1323	H42 up vs H0
Indole-5,6-quinone	147.032	4.56655	C8H5NO2	Amino Acid Metabolism	Tyrosine metabolism	Indole-5,6-quinone	1.85439e-05	0.000164042	0.0645952	-15.481	H42 down vs H0
Taurocholate	515.292	4.58015	C26H45NO7S	Lipid Metabolism	Bile acid biosynthesis__Taurine and hyp	Taurocholate	0.00913663	0.0230083	5.35252	5.35252	H42 up vs H0
(S)-3-Methyl-2-oxopentanoic acid	130.063	4.61024	C6H10O3	Amino Acid Metabolism	Valine, leucine and isoleucine degradat	(S)-3-Methyl-2-oxopentanoic acid	0.000165374	0.000943041	11.1372	11.1372	H42 up vs H0
Phe-Val	264.147	4.63137	C14H20N2O3	Peptide(di-)	Hydrophobic peptide	Phe-Val	0.0099958	0.0247208	30.5073	30.5073	H42 up vs H0
Tetrahydroharmine	216.126	4.63145	C13H16N2O	0	0	Tetrahydroharmine	3.91982e-06	5.10316e-05	9.18941	9.18941	H42 up vs H0
Lenacil	234.137	4.69225	C13H18N2O2	0	0	Lenacil	0.000966001	0.00345358	49.9031	49.9031	H42 up vs H0
Leu-Trp	317.174	4.71475	C17H23N3O3	Peptide(di-)	Hydrophobic peptide	Leu-Trp	0.00108609	0.00374701	9.2022	9.2022	H42 up vs H0
Leu-Ala-Tyr	365.195	4.71595	C18H27N3O5	Peptide(tri-)	Hydrophobic peptide	Leu-Ala-Tyr	0.0080624	0.0204524	34.8806	34.8806	H42 up vs H0
3-(3-Hydroxy-phenyl)-propanoic acid	166.063	4.72329	C9H10O3	Amino Acid Metabolism	Phenylalanine metabolism	3-(3-Hydroxy-phenyl)-propanoic acid	0.010995	0.0266196	9.82109	9.82109	H42 up vs H0
5-Methoxyindoleacetate	205.074	4.76679	C11H11NO3	Amino Acid Metabolism	Tryptophan metabolism	5-Methoxyindoleacetate	0.000793735	0.00296281	0.0992093	-10.0797	H42 down vs H0
[FA (7:2)] 2,4-heptadienal	110.073	4.79695	C7H10O	Lipids: Fatty Acyls	Fatty aldehydes	(8S,9S,10S)-8,10-dimethyl-1-octalin	0.00528633	0.0144173	0.0632024	-15.8222	H42 down vs H0
Leu-Val	230.163	4.80558	C11H22N2O3	Peptide(di-)	Hydrophobic peptide	Leu-Val	2.52229e-05	0.000209684	60.3035	60.3035	H42 up vs H0
(8S,9S,10S)-8,10-dimethyl-1-octalin	82.0782	4.81245	C12H20	0	geosmin biosynthesis	(8S,9S,10S)-8,10-dimethyl-1-octalin	0.0194923	0.0431079	0.0720065	-13.8876	H42 down vs H0
Phe-Tyr	328.142	4.82928	C18H20N2O4	Peptide(di-)	Hydrophobic peptide	Phe-Tyr	2.18487e-07	8.14961e-06	8420.22	8420.22	H42 up vs H0
8-keto-7-aminoperlagonate	185.105	4.83799	C9H15NO3	0	0	8-keto-7-aminoperlagonate	0.0119867	0.028718	0.173754	-5.75525	H42 down vs H0
Leu-Leu-Ser	331.211	4.83987	C15H29N3O5	Peptide(tri-)	Hydrophobic peptide	Leu-Leu-Ser	1.57677e-07	6.79981e-06	8512.3	8512.3	H42 up vs H0
Myxochlin B	405.19	4.84295	C20H27N3O6	0	0	Myxochlin B	1.30334e-05	0.000125783	921.331	921.331	H42 up vs H0
Glycocholate	465.309	4.89227	C26H43NO6	Lipid Metabolism	Bile acid biosynthesis	Glycocholate	0.00988028	0.0246115	4.1108	4.1108	H42 up vs H0
Leu-Leu-Asn	358.222	4.9081	C16H30N4O5	Peptide(tri-)	Hydrophobic peptide	Leu-Leu-Ser	0.000552246	0.00222723	333.384	333.384	H42 up vs H0
Cholate	408.288	4.90942	C24H40O5	Lipids: Sterol lipids	Bile acid biosynthesis	Cholate	0.00180922	0.00572802	7.64678	7.64678	H42 up vs H0
Leu-Val-Pro	327.216	4.93511	C16H29N3O4	Peptide(tri-)	Hydrophobic peptide	Leu-Val-Pro	0.00613381	0.0163021	9.79029	9.79029	H42 up vs H0
Agroclavine	119.074	4.94233	C16H18N2	0	0	Agroclavine	5.85236e-06	6.65893e-05	4.75046	4.75046	H42 up vs H0
Ala-Val-Val-Pro	384.237	4.94737	C18H32N4O5	Peptide(tetra-)	Hydrophobic peptide	Ala-Val-Val-Pro	0.000242707	0.00118771	4484.24	4484.24	H42 up vs H0
N6-Methyl-2'-deoxyadenosine	265.118	4.95427	C11H15N5O3	0	0	Agroclavine	0.000197704	0.00105895	48.4666	48.4666	H42 up vs H0
Leu-Tyr	294.158	4.96695	C15H22N2O4	Peptide(di-)	Hydrophobic peptide	Leu-Tyr	0.0161091	0.0362061	14.3473	14.3473	H42 up vs H0
Nitroethane	75.032	4.97908	C2H5NO2	0	0		0.00128391	0.00434262	0.129266	-7.73598	H42 down vs H0
N-Phenylacetamide	135.068	4.98098	C8H9NO	0	0	2-Phenylacetamide	3.83857e-06	5.09349e-05	5.06449	5.06449	H42 up vs H0
Phe-Ala	236.116	5.0024	C12H16N2O3	Peptide(di-)	Hydrophobic peptide	Phe-Ala	3.79672e-07	1.09156e-05	1245.4	1245.4	H42 up vs H0
Leu-Val-Gly	287.185	5.00391	C13H25N3O4	Peptide(tri-)	Hydrophobic peptide	Leu-Val-Gly	1.27965e-06	2.38638e-05	3899.2	3899.2	H42 up vs H0
N3-methylthymine	140.058	5.00541	C6H8N2O2	0	0		9.84264e-08	5.22417e-06	135.93	135.93	H42 up vs H0
Phe-Pro	262.132	5.00614	C14H18N2O3	Peptide(di-)	Hydrophobic peptide	Phe-Pro	0.000187739	0.00103061	112.729	112.729	H42 up vs H0
3-acetamidopropanal	115.063	5.00707	C5H9NO2	0	spermine and spermidine degradation	Agroclavine	0.0039332	0.0113079	2.61215	2.61215	H42 up vs H0
Diacetylmonoxime	101.048	5.0117	C4H7NO2	0	0	Agroclavine	0.00267471	0.00795496	16.4712	16.4712	H42 up vs H0
Chaksine	225.148	5.02629	C22H38N6O4	0	0	Chaksine	0.000555195	0.00222723	2.20097	2.20097	H42 up vs H0
valeronitrile	83.0735	5.0827	C5H9N	0	0	Piperideine	2.70371e-05	0.000217272	4.14408	4.14408	H42 up vs H0
Glu-Phe-Val	393.19	5.17828	C19H27N3O6	Peptide(tri-)	Hydrophobic peptide	Dethiobiotin	0.00104187	0.00370562	19.989	19.989	H42 up vs H0
Phenylacetylglycine	193.074	6.19411	C10H11NO3	Amino Acid Metabolism	Phenylalanine metabolism	Phenylacetylglycine	0.00171428	0.0055533	3.88635	3.88635	H42 up vs H0
2-Hydroxypyridine	95.0371	6.20671	C5H5NO	0	0	2-Hydroxypyridine	0.00030985	0.00143393	0.27161	-3.68174	H42 down vs H0
(Z)-Phenylacetaldehyde oxime	135.068	6.24693	C8H9NO	Xenobiotics Biodegradation and Metaboli	Styrene degradation	2-Phenylacetamide	4.78081e-05	0.000336608	10.6854	10.6854	H42 up vs H0
4-Nitroaniline	69.0215	6.3449	C6H6N2O2	0	0	Urocanate	0.000591702	0.00234475	0.44022	-2.27159	H42 down vs H0
N-Acetylmethionine	191.062	6.43037	C7H13NO3S	0	0	N-Acetylmethionine	2.65628e-08	1.83283e-06	840.964	840.964	H42 up vs H0
Triacetylene	74.0156	6.67757	C6H2	0	0	9,10-Anthraquinone	0.0143806	0.0330753	0.395807	-2.52649	H42 down vs H0
Arene oxide	94.0418	6.71828	C6H6O	0	0	9,10-Anthraquinone	0.00616643	0.0163021	0.297166	-3.36512	H42 down vs H0
Pyridine	79.0421	7.2654	C5H5N	0	0	Pyridine	0.000132542	0.000781659	0.181849	-5.49908	H42 down vs H0
D-Tyrosine	181.074	7.27036	C9H11NO3	Amino Acid Metabolism	0	Otonecine	0.0217308	0.0467111	0.203156	-4.92233	H42 down vs H0
Lumichrome	242.08	7.32505	C12H10N4O2	Metabolism of Cofactors and Vitamins	Riboflavin metabolism	Lumichrome	0.0156658	0.0355572	0.434859	-2.2996	H42 down vs H0
5-Hydroxypentanoate	118.063	7.35762	C5H10O3	Lipids: Fatty Acyls	Fatty Acids and Conjugates	5-Hydroxypentanoate	3.3856e-05	0.00025392	21.2759	21.2759	H42 up vs H0
LysoPE(0:0/18:1(11Z))	479.302	7.35838	C23H46NO7P	Lipids: Glycerophospholipids	Glycerophosphoethanolamines	[PE (18:1)] 1-(9Z-octadecenoyl)-sn-glyc	0.0103912	0.0255157	0.313735	-3.18741	H42 down vs H0
(S)-Methylmalonate semialdehyde	102.032	7.36099	C4H6O3	Amino Acid Metabolism	Valine, leucine and isoleucine degradat	2-Oxobutanoate	0.000473211	0.00197888	6.38758	6.38758	H42 up vs H0
Ile-Val-Gly-Pro	384.238	7.36241	C18H32N4O5	Peptide(tetra-)	Hydrophobic peptide	Ala-Val-Val-Pro	6.73289e-07	1.60196e-05	22753.5	22753.5	H42 up vs H0
Ala-Leu-Pro-Ser	386.216	7.36565	C17H30N4O6	Peptide(tetra-)	Hydrophobic peptide	2-Phenylacetamide	0.00326769	0.00955383	102.965	102.965	H42 up vs H0
Quinolin-4-ol	145.053	7.36586	C9H7NO	0	0	Isoquinoline	0.00460075	0.0129572	0.48944	-2.04315	H42 down vs H0
2-hydroxy-4-methylthiobutanoate	150.035	7.36713	C5H10O3S	0	dimethylsulfoniopropionate biosynthesis	5-Hydroxypentanoate	1.30308e-07	5.99417e-06	3813.71	3813.71	H42 up vs H0
Val-Val-Ala	287.185	7.36955	C13H25N3O4	Peptide(tri-)	Hydrophobic peptide	Leu-Val-Gly	4.96415e-05	0.000342526	659.384	659.384	H42 up vs H0
Methohexital	262.132	7.3698	C14H18N2O3	Xenobiotics Drugs etc	0	Leu-Pro	8.88511e-09	8.75818e-07	4946.38	4946.38	H42 up vs H0
Ile-Tyr	294.158	7.37108	C15H22N2O4	Peptide(di-)	Hydrophobic peptide	Leu-Tyr	0.0106455	0.0260475	29.7318	29.7318	H42 up vs H0
Albine	232.158	7.37189	C14H20N2O	0	0	Albine	5.5986e-08	3.51185e-06	212.698	212.698	H42 up vs H0
[FA methyl,hydroxy(5:0)] 3R-methyl-3,5-dihydroxy-pentanoic acid	148.074	7.37237	C6H12O4	Lipids: Fatty Acyls	Fatty Acids and Conjugates	[FA methyl,hydroxy(5:0)] 3R-methyl-3,5-	1.22522e-06	2.34834e-05	8.65674	8.65674	H42 up vs H0
Carbetamide	236.116	7.37293	C12H16N2O3	0	0	Phe-Ala	1.47005e-05	0.000137813	3877.17	3877.17	H42 up vs H0
Girgensonine	216.126	7.37424	C13H16N2O	0	0	Agroclavine	5.91396e-09	8.16126e-07	909.378	909.378	H42 up vs H0
Leu-Pro	228.148	7.37448	C11H20N2O3	Peptide(di-)	Hydrophobic peptide	Leu-Pro	0.00010224	0.000641321	6.07588	6.07588	H42 up vs H0
1-Pyrroline	69.0579	7.37523	C4H7N	Amino Acid Metabolism	Arginine and proline metabolism	1-Pyrroline	0.00092125	0.00332808	4.10601	4.10601	H42 up vs H0
Hippurate	179.058	7.37661	C9H9NO3	Amino Acid Metabolism	Phenylalanine metabolism	Hippurate	0.00824608	0.0208417	0.0484892	-20.6231	H42 down vs H0
Leu-Thr	232.142	7.37692	C10H20N2O4	Peptide(di-)	Hydrophobic peptide	Leu-Val-Gly	2.0762e-05	0.000176862	546.71	546.71	H42 up vs H0
[FA hydroxy(2:0/2:0)] 9S,15S-dihydroxy-11R,18-diacetoxy-5Z,13E-prostadienoic acid	454.257	7.37848	C24H38O8	Lipids: Fatty Acyls	Eicosanoids	Agroclavine	3.59805e-05	0.000264112	74.7985	74.7985	H42 up vs H0
Porphobilinogen	226.095	7.38299	C10H14N2O4	Metabolism of Cofactors and Vitamins	Porphyrin and chlorophyll metabolism	Agroclavine	2.89114e-07	9.06767e-06	812.157	812.157	H42 up vs H0
Piperidine	85.0891	7.38353	C5H11N	0	piperine biosynthesis	1-Pyrroline	6.37956e-05	0.000431558	3.03207	3.03207	H42 up vs H0
Leu-Gln-Tyr	422.217	7.38698	C20H30N4O6	Peptide(tri-)	Hydrophobic peptide		0.00178799	0.00572802	222.348	222.348	H42 up vs H0
Ala-Val-Asp-Pro	400.196	7.38788	C17H28N4O7	Peptide(tetra-)	Hydrophobic peptide	Ala-Val-Asp-Pro	0.000220298	0.00110953	157.109	157.109	H42 up vs H0
5,6-Dihydrothymine	128.059	7.38916	C5H8N2O2	Nucleotide Metabolism	Pyrimidine metabolism	Agroclavine	7.48498e-07	1.61395e-05	158.565	158.565	H42 up vs H0
Asn-Leu-Leu-Ser	445.254	7.39246	C19H35N5O7	Peptide(tetra-)	Hydrophobic peptide	Asn-Leu-Leu-Ser	0.0100718	0.0248197	38.661	38.661	H42 up vs H0
Thymine	126.043	7.39422	C5H6N2O2	Nucleotide Metabolism	Pyrimidine metabolism	Thymine	1.10581e-07	5.45009e-06	0.127191	-7.86221	H42 down vs H0
Val-Asp-Pro	329.159	7.39658	C14H23N3O6	Peptide(tri-)	Hydrophobic peptide	Leu-Val-Gly	0.000181064	0.00100754	424.446	424.446	H42 up vs H0
Dethiobiotin	214.132	7.39823	C10H18N2O3	Metabolism of Cofactors and Vitamins	Biotin metabolism	Leu-Pro	1.61376e-05	0.000146512	12.5942	12.5942	H42 up vs H0
3-Amino-2-piperidone	114.079	7.39944	C5H10N2O	0	0	Agroclavine	8.52119e-09	8.75818e-07	345.503	345.503	H42 up vs H0
Ala-Tyr	252.111	7.40651	C12H16N2O4	Peptide(di-)	Hydrophobic peptide	Phe-Ala	2.32387e-07	8.14961e-06	1229.94	1229.94	H42 up vs H0
Isoquinoline	129.058	7.40693	C9H7N	0	0	Isoquinoline	0.0019657	0.00613725	0.230076	-4.34639	H42 down vs H0
Met-Pro	246.104	7.42339	C10H18N2O3S	Peptide(di-)	Hydrophobic peptide	Met-Pro	6.94388e-06	7.48637e-05	102.389	102.389	H42 up vs H0
Thymidine	242.09	7.43035	C10H14N2O5	Nucleotide Metabolism	Pyrimidine metabolism	Thymine	0.000944028	0.0033926	0.014033	-71.2604	H42 down vs H0
beta-Aminopropion aldehyde	73.0527	7.47024	C3H7NO	Amino Acid Metabolism	beta-Alanine metabolism	Agroclavine	2.97412e-06	4.5567e-05	3.25077	3.25077	H42 up vs H0
3-Indoleacetonitrile	78.0343	7.48668	C10H8N2	Amino Acid Metabolism	Tryptophan metabolism	3-Indoleacetonitrile	0.000673437	0.00258151	0.202197	-4.94567	H42 down vs H0
3-Hydroxypropenoate	88.0161	7.50552	C3H4O3	0	0	3-Oxopropanoate	0.000235027	0.00117514	5.98305	5.98305	H42 up vs H0
N-Ethylmaleimide	125.048	7.50969	C6H7NO2	0	0	N-Ethylmaleimide	0.00180513	0.00572802	0.201986	-4.95083	H42 down vs H0
Met-Ala	220.088	7.58182	C8H16N2O3S	Peptide(di-)	Hydrophobic peptide	Met-Ala	0.00108214	0.00374701	7.03903	7.03903	H42 up vs H0
4-Hydroxybutanoic acid	104.047	7.74889	C4H8O3	Carbohydrate Metabolism	Butanoate metabolism	4-Hydroxybutanoic acid	3.57902e-07	1.07371e-05	17.733	17.733	H42 up vs H0
4-Hydroxy-3-nitrosobenzamide	166.038	7.99821	C7H6N2O3	0	0		0.000744413	0.00282222	0.0144688	-69.1141	H42 down vs H0
3-Oxohexobarbital	250.095	8.03865	C12H14N2O4	0	0		0.000170703	0.000958445	0.0108593	-92.087	H42 down vs H0
N2-(D-1-Carboxyethyl)-L-lysine	218.127	8.08606	C9H18N2O4	Amino Acid Metabolism	Lysine degradation	4-Hydroxybutanoic acid	1.05299e-06	2.13695e-05	43.915	43.915	H42 up vs H0
Ricinine	164.059	8.26539	C8H8N2O2	0	0	Ricinine	0.00570087	0.0154259	0.0886441	-11.2811	H42 down vs H0
Asn-Trp-Asp-Pro	530.213	8.34809	C24H30N6O8	Peptide(tetra-)	Hydrophobic peptide	Asn-Trp-Asp-Pro	0.000812699	0.00301485	158.724	158.724	H42 up vs H0
Asp-Pro-Tyr	393.154	8.4505	C18H23N3O7	Peptide(tri-)	Hydrophobic peptide	Asp-Pro-Tyr	0.00476629	0.0132078	19.1719	19.1719	H42 up vs H0
Deoxyuridine	228.075	8.45538	C9H12N2O5	Nucleotide Metabolism	Pyrimidine metabolism		0.000213965	0.00109475	0.00371	-269.542	H42 down vs H0
Borreline	266.142	8.63677	C17H18N2O	0	0	Borreline	0.000513815	0.00212295	77.4605	77.4605	H42 up vs H0
3-Methylbut-2-enal	84.0575	8.66945	C5H8O	Biosynthesis of Secondary Metabolites	Zeatin biosynthesis	Urocanate	0.000150915	0.000875056	0.246533	-4.05625	H42 down vs H0
sorbate	112.052	8.67734	C6H8O2	Lipids: Fatty Acyls	Fatty Acids and Conjugates	Urocanate	0.000292777	0.00136498	0.317161	-3.15297	H42 down vs H0
Maleimide	97.0164	8.68613	C4H3NO2	0	0	Urocanate	0.000218295	0.00110753	0.264436	-3.78163	H42 down vs H0
2-Phenylacetamide	135.068	8.69628	C8H9NO	Amino Acid Metabolism	Phenylalanine metabolism__Styrene degra	2-Phenylacetamide	4.9575e-07	1.31564e-05	10.2425	10.2425	H42 up vs H0
Brunfelsamidine	109.064	8.72265	C5H7N3	0	0	Brunfelsamidine	5.23259e-06	6.4473e-05	4.78073	4.78073	H42 up vs H0
2-amino-4-methylphenol	123.069	8.74454	C7H9NO	0	0	Urocanate	0.000197977	0.00105895	0.284726	-3.51215	H42 down vs H0
Iminoglycine	73.0164	8.74787	C2H3NO2	Metabolism of Cofactors and Vitamins	Thiamine metabolism	Urocanate	0.00282499	0.00836584	0.437027	-2.28819	H42 down vs H0
Trp-Gln-Tyr	495.212	8.78618	C25H29N5O6	Peptide(tri-)	Hydrophobic peptide	Trp-Gln-Tyr	1.46869e-06	2.59846e-05	1457.98	1457.98	H42 up vs H0
Ala-Ala-Pro-Tyr	420.2	8.80325	C20H28N4O6	Peptide(tetra-)	Hydrophobic peptide	Ala-Ala-Pro-Tyr	0.000292639	0.00136498	29.942	29.942	H42 up vs H0
Asn-Leu-Pro-Ser	429.222	8.83132	C18H31N5O7	Peptide(tetra-)	Hydrophobic peptide	Asn-Leu-Pro-Ser	0.000601478	0.00234475	67.4786	67.4786	H42 up vs H0
N-Hydroxy-2-acetamidofluorene	239.095	8.84928	C15H13NO2	0	0	Ala-Asn-Ser-Tyr	0.0233868	0.049652	0.0543325	-18.4052	H42 down vs H0
1-Methylhypoxanthine	150.054	8.86198	C6H6N4O	0	0	1-Methylhypoxanthine	0.000239523	0.00118771	0.0101385	-98.6336	H42 down vs H0
Homocysteinesulfinicacid	167.025	8.94476	C4H9NO4S	0	0	Homocysteinesulfinicacid	6.62232e-05	0.000443631	3.21537	3.21537	H42 up vs H0
3,5-dihydro-5-methylidene-4H-imidazol-4-one	196.096	8.95221	C8H12N4O2	0	0	1H-Imidazole-4-ethanamine	9.03437e-07	1.889e-05	193.527	193.527	H42 up vs H0
Ala-Pro-Ser-Tyr	436.196	8.97413	C20H28N4O7	Peptide(tetra-)	Hydrophobic peptide	Ala-Trp-Ser-Tyr	0.00204491	0.00632729	21.2616	21.2616	H42 up vs H0
Asn-Leu-Thr-Pro	443.238	8.97657	C19H33N5O7	Peptide(tetra-)	Hydrophobic peptide	Asn-Leu-Thr-Pro	0.000520368	0.00213722	78.2082	78.2082	H42 up vs H0
3-(4-Hydroxyphenyl)lactate	182.058	8.99505	C9H10O4	Amino Acid Metabolism	Tyrosine metabolism	3-(4-Hydroxyphenyl)lactate	0.000202914	0.00106069	5.03891	5.03891	H42 up vs H0
Leu-Asn	245.138	9.00006	C10H19N3O4	Peptide(di-)	Hydrophobic peptide	Leu-Asn	6.3709e-07	1.56997e-05	15.7453	15.7453	H42 up vs H0
1H-Imidazole-4-ethanamine	111.08	9.0181	C5H9N3	Amino Acid Metabolism	Histidine metabolism	1H-Imidazole-4-ethanamine	2.031e-06	3.41803e-05	88.8387	88.8387	H42 up vs H0
Met-Ser	236.083	9.07876	C8H16N2O4S	Peptide(di-)	Hydrophobic peptide	Leu-Asn	4.8197e-07	1.31564e-05	193.537	193.537	H42 up vs H0
Tauropine	197.036	9.08712	C5H11NO5S	0	0	Tauropine	2.07653e-08	1.592e-06	72.2236	72.2236	H42 up vs H0
Thr-Tyr	282.122	9.09013	C13H18N2O5	Peptide(di-)	Hydrophobic peptide	Thr-Tyr	0.000241477	0.00118771	90.365	90.365	H42 up vs H0
Hexazinone	126.079	9.12866	C12H20N4O2	0	0	Hexazinone	3.0378e-06	4.5567e-05	9.46449	9.46449	H42 up vs H0
Ala-Phe-Val-Asp	450.212	9.20804	C21H30N4O7	Peptide(tetra-)	Hydrophobic peptide	Ala-Phe-Val-Asp	0.00735009	0.019066	31.0836	31.0836	H42 up vs H0
Lys-Phe-Cys	396.183	9.23143	C18H28N4O4S	Peptide(tri-)	Basic peptide	Lys-Phe-Cys	0.000909759	0.00330386	383.919	383.919	H42 up vs H0
Adenine	135.054	9.25319	C5H5N5	Nucleotide Metabolism	Purine metabolism__Zeatin biosynthesis	Adenine	4.42515e-06	5.55155e-05	0.0684331	-14.6128	H42 down vs H0
(R)-3-Hydroxybutanoate	104.047	9.25613	C4H8O3	Lipid Metabolism	Synthesis and degradation of ketone bod	(R)-3-Hydroxybutanoate	0.00121122	0.0041579	3.82497	3.82497	H42 up vs H0
Glu-Leu-Leu-Gln	501.28	9.26838	C22H39N5O8	Peptide(tetra-)	Hydrophobic peptide	Ala-Phe-Val-Asp	0.00021419	0.00109475	81.1823	81.1823	H42 up vs H0
Ala-Val-Asn-Pro	399.212	9.26904	C17H29N5O6	Peptide(tetra-)	Hydrophobic peptide		0.00470102	0.0131237	18.2531	18.2531	H42 up vs H0
1-(beta-D-Ribofuranosyl)-1,4-dihydronicotinamide	256.106	9.29593	C11H16N2O5	0	0	1-(beta-D-Ribofuranosyl)-1,4-dihydronic	0.000513623	0.00212295	0.0556481	-17.9701	H42 down vs H0
Leu-Gln-Ser	346.185	9.30897	C14H26N4O6	Peptide(tri-)	Hydrophobic peptide	Leu-Gln-Ser	0.000124563	0.000747378	217.345	217.345	H42 up vs H0
Asp-Leu-Leu-Gln	487.265	9.31154	C21H37N5O8	Peptide(tetra-)	Hydrophobic peptide	Ala-Phe-Thr-Gln	0.000349938	0.00155386	201.771	201.771	H42 up vs H0
6-Hydroxy-5-methoxyindoleglucuronide	339.096	9.37483	C15H17NO8	0	0	6-Hydroxy-5-methoxyindoleglucuronide	5.88646e-06	6.65893e-05	89.9044	89.9044	H42 up vs H0
5-Methylcytosine	125.059	9.37639	C5H7N3O	Nucleotide Metabolism	Pyrimidine metabolism	5-Methylcytosine	3.20103e-05	0.000243145	0.00561131	-178.212	H42 down vs H0
Homolanthionine	268.073	9.40283	C8H16N2O6S	0	0	Homolanthionine	0.00260934	0.00782801	0.412596	-2.42368	H42 down vs H0
Dihydroclavaminic acid	200.08	9.40991	C8H12N2O4	Biosynthesis of Secondary Metabolites	Clavulanic acid biosynthesis	Dihydroclavaminic acid	0.0198137	0.043499	2.21037	2.21037	H42 up vs H0
Ala-Leu-Ser-Ser	376.196	9.41632	C15H28N4O7	Peptide(tetra-)	Hydrophobic peptide	Ala-Leu-Ser-Ser	2.53812e-10	5.83767e-08	3920.84	3920.84	H42 up vs H0
3',5'-Cyclic AMP	329.053	9.43961	C10H12N5O6P	Nucleotide Metabolism	Purine metabolism	3',5'-Cyclic AMP	4.17551e-05	0.000299384	0.00160449	-623.25	H42 down vs H0
L-2-Aminoadipate	161.069	9.45641	C6H11NO4	Amino Acid Metabolism	Lysine biosynthesis__Lysine degradation	L-2-Aminoadipate	0.0202053	0.0441192	2.58539	2.58539	H42 up vs H0
N6-Acetyl-N6-hydroxy-L-lysine	204.111	9.47185	C8H16N2O4	Amino Acid Metabolism	Lysine degradation	Dihydroclavaminic acid	0.0015694	0.00513217	4.69434	4.69434	H42 up vs H0
Trp-Ala-Gly	166.074	9.50277	C16H20N4O4	Peptide(tri-)	Hydrophobic peptide	Trp-Ala-Gly	0.0057316	0.0154485	0.0301189	-33.2018	H42 down vs H0
5,6-Dihydroxyindole	149.048	9.51234	C8H7NO2	Amino Acid Metabolism	Tyrosine metabolism	Aniline	0.00034024	0.00153441	0.0881489	-11.3444	H42 down vs H0
N-Acetyl-4-O-acetylneuraminate	351.117	9.51727	C13H21NO10	0	0	N-Acetyl-4-O-acetylneuraminate	0.0204991	0.0446195	0.0660679	-15.136	H42 down vs H0
D-Proline	115.063	9.51982	C5H9NO2	Amino Acid Metabolism	Arginine and proline metabolism	D-Proline	2.97252e-06	4.5567e-05	4.40853	4.40853	H42 up vs H0
Val-Gly-Pro	271.153	9.58578	C12H21N3O4	Peptide(tri-)	Hydrophobic peptide	Val-Gly-Pro	1.49797e-05	0.000137813	751.518	751.518	H42 up vs H0
(R)-Lactate	90.0318	9.59438	C3H6O3	Carbohydrate Metabolism	Pyruvate metabolism	(R)-Lactate	1.36053e-08	1.17346e-06	71.7766	71.7766	H42 up vs H0
Nicotyrine	158.084	9.6005	C10H10N2	0	0	Nicotyrine	0.00108454	0.00374701	8.28376	8.28376	H42 up vs H0
N-Benzylformamide	135.068	9.75462	C8H9NO	0	0	2-Phenylacetamide	2.76726e-05	0.000217272	4.42039	4.42039	H42 up vs H0
Glu-Gln-Pro-Tyr	535.228	9.8033	C24H33N5O9	Peptide(tetra-)	Hydrophobic peptide		0.000438135	0.00185468	185.036	185.036	H42 up vs H0
Creatinine	113.059	9.81468	C4H7N3O	Amino Acid Metabolism	Arginine and proline metabolism	Creatinine	6.57539e-06	7.20162e-05	0.33482	-2.98668	H42 down vs H0
Pyrazinamide	123.043	9.8343	C5H5N3O	0	0	Creatinine	0.000289752	0.00136498	0.272443	-3.67049	H42 down vs H0
7-Methylxanthine	166.049	9.85362	C6H6N4O2	Biosynthesis of Secondary Metabolites	Caffeine metabolism	Creatinine	0.000373329	0.00162011	0.256657	-3.89625	H42 down vs H0
3-Methylguanine	165.065	9.92423	C6H7N5O	0	0	Orotate(Fragment)	9.12394e-06	9.39629e-05	0.104252	-9.59212	H42 down vs H0
Ala-Gly-Tyr	309.133	9.94144	C14H19N3O5	Peptide(tri-)	Hydrophobic peptide	Ala-Gly-Tyr	0.000825904	0.00304745	113.99	113.99	H42 up vs H0
Orotate(Fragment)	112.027	9.96334	C4H4N2O2	Nucleotide Metabolism	Pyrimidine metabolism	Orotate(Fragment)	8.72646e-10	1.50532e-07	0.0534279	-18.7168	H42 down vs H0
Orotate	156.017	9.99657	C5H4N2O4	Nucleotide Metabolism	Pyrimidine metabolism	Orotate	0.00256342	0.00772383	0.300315	-3.32984	H42 down vs H0
L-1-Pyrroline-3-hydroxy-5-carboxylate	129.043	10.0297	C5H7NO3	Amino Acid Metabolism	Arginine and proline metabolism	L-1-Pyrroline-3-hydroxy-5-carboxylate	0.000119089	0.000720799	4.4917	4.4917	H42 up vs H0
Dap	109.064	10.0832	C5H7N3	0	0	L-Lysine 1,6-lactam	5.79335e-05	0.000395784	2.35467	2.35467	H42 up vs H0
L-Arabinose	150.053	10.0863	C5H10O5	Carbohydrate Metabolism	Pentose and glucuronate interconversion	D-Xylulose	0.00516042	0.0141297	2.55565	2.55565	H42 up vs H0
L-Phenylalanine	165.079	10.1095	C9H11NO2	Amino Acid Metabolism	Phenylalanine metabolism__Phenylalanine	L-Phenylalanine	2.8247e-05	0.000218993	13.5563	13.5563	H42 up vs H0
N-Acetylornithine	174.1	10.1482	C7H14N2O3	Amino Acid Metabolism	Arginine and proline metabolism	N-Acetylornithine	2.771e-05	0.000217272	582.489	582.489	H42 up vs H0
Ala-Leu-Asp-Ser	404.191	10.1537	C16H28N4O8	Peptide(tetra-)	Hydrophobic peptide	Ala-Leu-Asp-Ser	0.000784624	0.00295842	129.898	129.898	H42 up vs H0
Ala-Thr-Thr-Tyr	454.207	10.1581	C20H30N4O8	Peptide(tetra-)	Hydrophobic peptide	Ala-Thr-Thr-Tyr	0.000196438	0.00105895	233.397	233.397	H42 up vs H0
methiin	151.03	10.1952	C4H9NO3S	0	0	N-Acetylputrescine	0.00106665	0.00374701	0.103947	-9.62031	H42 down vs H0
N-Acetylputrescine	130.111	10.2028	C6H14N2O	Amino Acid Metabolism	Arginine and proline metabolism	N-Acetylputrescine	0.000870148	0.00317673	0.234919	-4.25678	H42 down vs H0
4-Aminobutanal	87.0684	10.2047	C4H9NO	Amino Acid Metabolism	Arginine and proline metabolism__beta-A	N-Acetylputrescine	0.000188198	0.00103061	0.230132	-4.34533	H42 down vs H0
Leu-Val-Asp	345.19	10.2162	C15H27N3O6	Peptide(tri-)	Hydrophobic peptide	Leu-Val-Asp	1.15729e-06	2.28151e-05	627.148	627.148	H42 up vs H0
indigo	131.037	10.2288	C16H10N2O2	0	indigo biosynthesis	indigo	0.00783431	0.0200677	0.385183	-2.59617	H42 down vs H0
Actinidine	147.105	10.3051	C10H13N	0	0	Actinidine	0.0207669	0.0450602	0.139725	-7.15694	H42 down vs H0
2-Oxoglutaramate	145.038	10.3182	C5H7NO4	Amino Acid Metabolism	Glutamate metabolism	2-Oxoglutaramate	3.2067e-05	0.000243145	9.16317	9.16317	H42 up vs H0
Deoxycytidine	227.091	10.3573	C9H13N3O4	Nucleotide Metabolism	Pyrimidine metabolism	Deoxycytidine	3.92446e-11	2.70788e-08	0.00086564	-1155.21	H42 down vs H0
D-Glutamate	147.053	10.3619	C5H9NO4	Amino Acid Metabolism	Glutamate metabolism__D-Glutamine and D	D-Glutamate	0.00716321	0.0186514	2.63351	2.63351	H42 up vs H0
5-Hydroxytryptophol	177.079	10.3741	C10H11NO2	0	0	5-Hydroxytryptophol	0.000684217	0.00260834	0.216818	-4.61216	H42 down vs H0
Ser-Tyr	268.106	10.3916	C12H16N2O5	Peptide(di-)	Hydrophobic peptide	Ser-Tyr	2.4572e-05	0.000206764	41.0488	41.0488	H42 up vs H0
Ala-Leu-Asp-Tyr	480.222	10.3942	C22H32N4O8	Peptide(tetra-)	Hydrophobic peptide	Leu-Lys-Val	5.88688e-06	6.65893e-05	137.163	137.163	H42 up vs H0
hydrogen iodide	127.912	10.4304	HI	0	0	hydrogen iodide	0.0154108	0.0350938	0.225898	-4.42678	H42 down vs H0
2-O-Methylcytosine	125.059	10.4791	C5H7N3O	0	0	5-Methylcytosine	0.00107631	0.00374701	0.0628149	-15.9198	H42 down vs H0
Ala-His	226.107	10.5166	C9H14N4O3	Peptide(di-)	Basic peptide	Carnosine	4.88536e-05	0.000340495	150.836	150.836	H42 up vs H0
D-Alanyl-D-alanine	160.085	10.5311	C6H12N2O3	Amino Acid Metabolism	D-Alanine metabolism__Peptidoglycan bio	D-Alanyl-D-alanine	0.0029785	0.00878277	38.751	38.751	H42 up vs H0
N3-(4-methoxyfumaroyl)-L-2,3-diaminopropanoate	216.075	10.5493	C8H12N2O5	0	0	L-Leucine	0.0134059	0.0311449	2.78905	2.78905	H42 up vs H0
L-3-Amino-isobutanoate	103.063	10.5521	C4H9NO2	Amino Acid Metabolism	Valine, leucine and isoleucine degradat	Arg-Thr-Ser-Tyr	9.1732e-05	0.000591543	5.5521	5.5521	H42 up vs H0
L-Leucine	131.095	10.5986	C6H13NO2	Amino Acid Metabolism	Valine, leucine and isoleucine degradat	L-Leucine	0.00335649	0.00977206	3.71442	3.71442	H42 up vs H0
Stachydrine	143.094	10.6268	C7H13NO2	0	stachydrine degradation	3-Butynoate	3.92656e-05	0.000285192	0.147924	-6.76021	H42 down vs H0
Phe-Asp	280.106	10.6489	C13H16N2O5	Peptide(di-)	Hydrophobic peptide	L-Leucine	0.019643	0.0433024	3.32462	3.32462	H42 up vs H0
N-Acetyl-D-fucosamine	205.095	10.6515	C8H15NO5	0	0	(S)-Dihydroorotate	3.11666e-06	4.57552e-05	0.114227	-8.75453	H42 down vs H0
DL-2-Aminooctanoicacid	159.126	10.6597	C8H17NO2	0	0	(S)-Dihydroorotate	0.00616409	0.0163021	0.0896629	-11.1529	H42 down vs H0
(S)-Carnitine	161.105	10.6598	C7H15NO3	0	gamma-butyrobetaine degradation __ carn	(S)-Dihydroorotate	0.00792323	0.0201735	0.105534	-9.47562	H42 down vs H0
O-Acetylcarnitine	203.116	10.6676	C9H17NO4	Amino Acid Metabolism	Alanine and aspartate metabolism	(S)-Dihydroorotate	0.00352455	0.0102182	0.0822925	-12.1518	H42 down vs H0
3-Butynoate	84.0211	10.67	C4H4O2	Carbohydrate Metabolism	Butanoate metabolism	3-Butynoate	7.11354e-05	0.000471956	0.142401	-7.0224	H42 down vs H0
Asn-Tyr	295.117	10.6858	C13H17N3O5	Peptide(di-)	Hydrophobic peptide	Asn-Tyr	0.000161257	0.000927226	91.0437	91.0437	H42 up vs H0
N-Formimino-L-glutamate	174.064	10.6887	C6H10N2O4	Amino Acid Metabolism	Histidine metabolism	N-Formimino-L-glutamate	0.00203487	0.00632458	6.98513	6.98513	H42 up vs H0
(S)-Dihydroorotate	158.033	10.7068	C5H6N2O4	Nucleotide Metabolism	Pyrimidine metabolism	(S)-Dihydroorotate	0.00450193	0.0127309	0.0150917	-66.2618	H42 down vs H0
Glu-Leu	260.137	10.7646	C11H20N2O5	Peptide(di-)	Hydrophobic peptide	Glu-Leu	5.51454e-06	6.58689e-05	22.5621	22.5621	H42 up vs H0
4-Hydroxy-2-oxoglutarate	162.016	10.8059	C5H6O6	Carbohydrate Metabolism	Glyoxylate and dicarboxylate metabolism	4-Hydroxy-2-oxoglutarate	0.00510232	0.0140263	0.0746651	-13.3931	H42 down vs H0
Maleamate	115.027	10.8227	C4H5NO3	Metabolism of Cofactors and Vitamins	Nicotinate and nicotinamide metabolism	Maleamate	1.31252e-05	0.000125783	0.0791088	-12.6408	H42 down vs H0
Asp-Asp-Pro-Tyr	508.181	10.8318	C22H28N4O10	Peptide(tetra-)	Hydrophobic peptide		0.00496149	0.0136937	26.2284	26.2284	H42 up vs H0
Ala-Leu-Ala-Asp	388.196	10.882	C16H28N4O7	Peptide(tetra-)	Hydrophobic peptide	Asp-Leu-Gln-Pro	0.000104694	0.000650798	76.2554	76.2554	H42 up vs H0
Leu-Ala-Asp	317.159	10.8879	C13H23N3O6	Peptide(tri-)	Hydrophobic peptide	Ala-Lys-Met-Pro	0.00471548	0.0131237	25.6839	25.6839	H42 up vs H0
Aminoacetone	73.0528	10.8904	C3H7NO	Amino Acid Metabolism	Glycine, serine and threonine metabolis	Aminoacetone	0.00253161	0.0076952	0.419777	-2.38222	H42 down vs H0
Asp-Leu-Gln-Pro	471.233	10.8938	C20H33N5O8	Peptide(tetra-)	Hydrophobic peptide	Asp-Leu-Gln-Pro	0.000323468	0.00146838	184.424	184.424	H42 up vs H0
D-Glucosamine	179.079	10.8987	C6H13NO5	Carbohydrate Metabolism	Aminosugars metabolism	D-Glucosamine	0.015762	0.0356583	0.22613	-4.42224	H42 down vs H0
Betaine	117.079	10.9096	C5H11NO2	Amino Acid Metabolism	Glycine, serine and threonine metabolis	Betaine	0.00448286	0.0127291	0.145907	-6.8537	H42 down vs H0
Propanoyl phosphate	154.003	10.9283	C3H7O5P	Carbohydrate Metabolism	Propanoate metabolism__C5-Branched diba	Propanoyl phosphate	0.00596206	0.0160071	0.0402868	-24.822	H42 down vs H0
D-2-Amino-hexano-6-lactam	128.095	10.9558	C6H12N2O	0	0	L-Lysine 1,6-lactam	1.31868e-06	2.39445e-05	7.2577	7.2577	H42 up vs H0
citraconate	130.027	10.9653	C5H6O4	Amino Acid Metabolism	Valine, leucine and isoleucine biosynth	2,5-Dioxopentanoate	0.00365658	0.0105567	0.192497	-5.19489	H42 down vs H0
Leu-Asp-Gln	374.18	10.9675	C15H26N4O7	Peptide(tri-)	Hydrophobic peptide	Leu-Asp-Gln	3.28911e-06	4.7281e-05	219.743	219.743	H42 up vs H0
L-Methionine	149.051	11.0541	C5H11NO2S	Amino Acid Metabolism	Methionine metabolism	L-Methionine	0.000282308	0.0013434	4.95628	4.95628	H42 up vs H0
Indole	117.058	11.0869	C8H7N	Amino Acid Metabolism	Tryptophan metabolism__Phenylalanine, t	Indole	0.00262839	0.00785104	5.03352	5.03352	H42 up vs H0
THTC	132.025	11.0967	C5H8O2S	0	0		0.0078526	0.0200677	11.535	11.535	H42 up vs H0
Phe-Arg	321.18	11.1229	C15H23N5O3	Peptide(di-)	Basic peptide	Phe-Arg	3.52327e-06	4.76678e-05	268.451	268.451	H42 up vs H0
O-Acetyl-L-homoserine	161.069	11.1443	C6H11NO4	Amino Acid Metabolism	Methionine metabolism__Sulfur metabolis	L-2-Aminoadipate	0.00027238	0.00130515	0.332585	-3.00675	H42 down vs H0
Asp-Lys-Met-Trp	578.253	11.1769	C26H38N6O7S	Peptide(tetra-)	Basic peptide	Asp-Lys-Met-Trp	0.00471691	0.0131237	24.7403	24.7403	H42 up vs H0
N-Acetyl-L-citrulline	217.106	11.1808	C8H15N3O4	Amino Acid Metabolism	arginine biosynthesis III	Ala-Ala-Ser	8.79092e-08	5.05478e-06	423.995	423.995	H42 up vs H0
Asp-Leu-Gln-Gln	502.239	11.2002	C20H34N6O9	Peptide(tetra-)	Hydrophobic peptide	Asp-Leu-Gln-Gln	2.1726e-06	3.56926e-05	1892.84	1892.84	H42 up vs H0
Ala-Asn	203.091	11.2059	C7H13N3O4	Peptide(di-)	Polar peptide	Ala-Asn	0.000407865	0.00175892	95.7066	95.7066	H42 up vs H0
Ala-Gly-His	283.128	11.222	C11H17N5O4	Peptide(tri-)	Basic peptide	Ala-Gly-His	4.39559e-06	5.55155e-05	173.659	173.659	H42 up vs H0
3-Methyleneoxindole	145.053	11.2631	C9H7NO	0	0	Chrysene	0.00106881	0.00374701	5.38643	5.38643	H42 up vs H0
L-Erythrulose	120.042	11.2642	C4H8O4	Carbohydrate Metabolism	0	L-Azetidine 2-carboxylic acid	7.24089e-05	0.00047583	0.101152	-9.88613	H42 down vs H0
2-Naphthylamine	143.073	11.2664	C10H9N	0	0	Chrysene	0.00013205	0.000781659	67.3868	67.3868	H42 up vs H0
L-Asparagine	132.053	11.2687	C4H8N2O3	Amino Acid Metabolism	Alanine and aspartate metabolism__Tetra	L-Tryptophan	3.4739e-06	4.76678e-05	15.9121	15.9121	H42 up vs H0
L-Tryptophan	204.09	11.2706	C11H12N2O2	Amino Acid Metabolism	Tryptophan metabolism__Phenylalanine, t	L-Tryptophan	0.00122993	0.00420125	7.43386	7.43386	H42 up vs H0
Met-Asp	264.078	11.2739	C9H16N2O5S	Peptide(di-)	Hydrophobic peptide	L-Tryptophan	1.82366e-06	3.14582e-05	49.2126	49.2126	H42 up vs H0
D-Alanine	89.0477	11.2743	C3H7NO2	Amino Acid Metabolism	Alanine and aspartate metabolism__D-Ala	D-Alanine	3.37082e-06	4.74667e-05	14.186	14.186	H42 up vs H0
Indoleacrylicacid	187.063	11.2765	C11H9NO2	0	0	Chrysene	0.0218368	0.0467932	7.09085	7.09085	H42 up vs H0
3-Methylene-indolenine	129.058	11.2923	C9H7N	0	0	Chrysene	3.42288e-05	0.000253955	5.70551	5.70551	H42 up vs H0
2-Aminophenol	109.053	11.2954	C6H7NO	Amino Acid Metabolism	Tryptophan metabolism__Naphthalene and	2-Hydroxypyridine	5.99674e-06	6.67379e-05	0.268623	-3.7227	H42 down vs H0
Thr-Ser	206.09	11.2961	C7H14N2O5	Peptide(di-)	Polar peptide	L-Tryptophan	0.000558895	0.00222912	26.8959	26.8959	H42 up vs H0
2-Aminoacrylate	87.0321	11.2968	C3H5NO2	Amino Acid Metabolism	Cysteine metabolism	L-Azetidine 2-carboxylic acid	0.000794377	0.00296281	0.212335	-4.70953	H42 down vs H0
Vinylacetylglycine	143.058	11.3014	C6H9NO3	0	0	2-Hydroxypyridine	0.000351306	0.00155386	0.29152	-3.4303	H42 down vs H0
L-Azetidine 2-carboxylic acid	101.048	11.3024	C4H7NO2	0	0	L-Azetidine 2-carboxylic acid	0.00125471	0.00426479	0.300048	-3.3328	H42 down vs H0
2-Aminomuconate semialdehyde	141.043	11.3053	C6H7NO3	Amino Acid Metabolism	Tryptophan metabolism__Naphthalene and	L-Azetidine 2-carboxylic acid	0.000358424	0.00156527	0.120718	-8.28375	H42 down vs H0
2-oxobut-3-enanoate	100.016	11.3056	C4H4O3	0	3-methylquinoline degradation	2-Hydroxypyridine	0.00326656	0.00955383	0.032436	-30.83	H42 down vs H0
crotonaldehyde	70.0419	11.3118	C4H6O	0	0	2-Hydroxypyridine	9.78191e-05	0.000624955	0.282937	-3.53436	H42 down vs H0
Gly-Ser	162.064	11.3256	C5H10N2O4	Peptide(di-)	Polar peptide	L-Tryptophan	0.000623016	0.00241506	49.9113	49.9113	H42 up vs H0
Leu-Lys-Thr	360.238	11.3486	C16H32N4O5	Peptide(tri-)	Basic peptide	Leu-Lys-Thr	0.000596089	0.00234475	119.289	119.289	H42 up vs H0
L-proline amide	114.079	11.4209	C5H10N2O	0	0	L-proline amide	9.79455e-06	9.79455e-05	7.28313	7.28313	H42 up vs H0
Leu-Lys	259.189	11.438	C12H25N3O3	Peptide(di-)	Basic peptide	Leu-Lys	0.00156745	0.00513217	19.9539	19.9539	H42 up vs H0
Cytidine	243.086	11.4465	C9H13N3O5	Nucleotide Metabolism	Pyrimidine metabolism	Cytidine	1.99276e-05	0.000171875	0.175963	-5.683	H42 down vs H0
Leu-Arg	287.196	11.4598	C12H25N5O3	Peptide(di-)	Basic peptide	Glu-Val	2.07489e-07	8.14961e-06	163.552	163.552	H42 up vs H0
Cytosine	111.043	11.4606	C4H5N3O	Nucleotide Metabolism	Pyrimidine metabolism	Cytosine	7.15189e-06	7.592e-05	0.168339	-5.9404	H42 down vs H0
Glycylproline	172.085	11.5179	C7H12N2O3	Peptide(di-)	Polar peptide	Glycylproline	0.000357791	0.00156527	40.0292	40.0292	H42 up vs H0
Glu-Val	246.121	11.5393	C10H18N2O5	Peptide(di-)	Hydrophobic peptide	Glu-Val	0.0013852	0.00463974	4.03981	4.03981	H42 up vs H0
1-O-methyl-&beta;-D-glucuronate	208.058	11.5731	C7H12O7	0	0	1-O-methyl-&beta;-D-glucuronate	0.00053368	0.00217893	7.54704	7.54704	H42 up vs H0
N2-Succinyl-L-ornithine	232.106	11.6498	C9H16N2O5	Amino Acid Metabolism	Arginine and proline metabolism	N2-Succinyl-L-ornithine	0.00637784	0.0167966	14.1227	14.1227	H42 up vs H0
P-DPD	212.009	11.7518	C5H9O7P	0	0	P-DPD	0.000270324	0.00130436	0.00570161	-175.389	H42 down vs H0
Ala-Asn-Gly	260.112	11.8062	C9H16N4O5	Peptide(tri-)	Polar peptide	Ala-Asn-Gly	1.17925e-05	0.00011624	384.262	384.262	H42 up vs H0
Ala-Gly-Ser	233.101	11.8617	C8H15N3O5	Peptide(tri-)	Polar peptide	Ala-Gly-Ser	0.000170853	0.000958445	119.759	119.759	H42 up vs H0
2,7-Anhydro-alpha-N-acetylneuraminic acid	291.095	11.9108	C11H17NO8	0	0	N-Acetyl-D-glucosamine	0.00397193	0.0113719	0.433683	-2.30583	H42 down vs H0
Ala-Ser	176.08	11.9132	C6H12N2O4	Peptide(di-)	Polar peptide	Ala-Ser	2.56875e-06	4.12194e-05	1122.31	1122.31	H42 up vs H0
L-Proline	115.063	11.9384	C5H9NO2	Amino Acid Metabolism	Arginine and proline metabolism__Novobi	L-Proline	0.00142175	0.00473916	3.19097	3.19097	H42 up vs H0
Guanosine	283.092	11.9537	C10H13N5O5	Nucleotide Metabolism	Purine metabolism	Ser-Ser	0.0129215	0.0304294	25.6026	25.6026	H42 up vs H0
Ser-Ser	192.075	11.9644	C6H12N2O5	Peptide(di-)	Polar peptide	Ser-Ser	0.000109594	0.000669205	70.5306	70.5306	H42 up vs H0
Isobutyronitrile	69.0579	11.9746	C4H7N	0	superpathway of linamarin and lotaustra	Isobutyronitrile	0.0124148	0.0296409	2.16992	2.16992	H42 up vs H0
2-Methylcitrate	206.043	11.977	C7H10O7	Carbohydrate Metabolism	Propanoate metabolism	2-Hydroxybutane-1,2,4-tricarboxylate	0.0171848	0.0382501	0.419674	-2.3828	H42 down vs H0
3-Amino-3-(4-hydroxyphenyl)propanoate	181.074	12.0093	C9H11NO3	Amino Acid Metabolism	Tyrosine metabolism	3-Amino-3-(4-hydroxyphenyl)propanoate	2.70565e-05	0.000217272	18.1447	18.1447	H42 up vs H0
(R)-piperidine-3-carboxamide	128.095	12.0524	C6H12N2O	0	0		8.21217e-06	8.58545e-05	5.68829	5.68829	H42 up vs H0
Fagomine	147.089	12.0932	C6H13NO3	0	0	Glaucarubolone	0.0166666	0.0372687	0.336888	-2.96834	H42 down vs H0
Tiglic acid	100.052	12.1292	C5H8O2	Lipids: Fatty Acyls	Fatty Acids and Conjugates	3-Butynoate	0.00656227	0.0172166	0.187811	-5.32449	H42 down vs H0
enol-Phenylpyruvate	164.047	12.1461	C9H8O3	Amino Acid Metabolism	Phenylalanine metabolism		0.000431151	0.00183638	74.0728	74.0728	H42 up vs H0
2-Oxobutanoate	102.032	12.1548	C4H6O3	Amino Acid Metabolism	Glycine, serine and threonine metabolis	3-Butynoate	0.0198582	0.043499	0.278361	-3.59245	H42 down vs H0
Betaine aldehyde	101.084	12.1549	C5H11NO	Amino Acid Metabolism	Glycine, serine and threonine metabolis	3-Butynoate	0.0180438	0.0400328	0.305244	-3.27606	H42 down vs H0
O-Succinyl-L-homoserine	219.074	12.1724	C8H13NO6	Amino Acid Metabolism	Methionine metabolism__Sulfur metabolis	myo-Inositol	0.012827	0.0303103	38.3417	38.3417	H42 up vs H0
N-Methyl-2-pyrrolidinone	99.0684	12.1927	C5H9NO	0	0	3-Butynoate	0.000347539	0.00155386	0.269737	-3.70731	H42 down vs H0
Val-Arg	273.18	12.241	C11H23N5O3	Peptide(di-)	Basic peptide	Val-Arg	2.48032e-07	8.14961e-06	1167.03	1167.03	H42 up vs H0
N-Acetyl-L-glutamate	189.064	12.2836	C7H11NO5	Amino Acid Metabolism	Arginine and proline metabolism	N-Acetyl-L-glutamate	0.00032336	0.00146838	9.96498	9.96498	H42 up vs H0
3-sulfopropanal	137.999	12.287	C3H6O4S	0	0	3-sulfopropanal	0.000462147	0.0019444	32.7838	32.7838	H42 up vs H0
4-Hydroxyaniline	109.053	12.3345	C6H7NO	Xenobiotics Biodegradation and Metaboli	gamma-Hexachlorocyclohexane degradation	2-Hydroxypyridine	9.97191e-05	0.00063125	0.390509	-2.56076	H42 down vs H0
Aminohydroquinone	125.048	12.3452	C6H7NO2	0	0	2-Hydroxypyridine	0.00244412	0.00749532	0.399656	-2.50215	H42 down vs H0
pyridine-N-oxide	95.0371	12.3487	C5H5NO	0	0	2-Hydroxypyridine	0.00180972	0.00572802	0.258947	-3.8618	H42 down vs H0
Retronecine	155.095	12.3763	C8H13NO2	Biosynthesis of Secondary Metabolites	Alkaloid biosynthesis II	Retronecine	0.015269	0.034886	0.391229	-2.55605	H42 down vs H0
Puromycin	471.223	12.4067	C22H29N7O5	Biosynthesis of Secondary Metabolites	Puromycin biosynthesis	Puromycin	7.36159e-07	1.61395e-05	82.5209	82.5209	H42 up vs H0
N-Acetyl-L-aspartate	175.048	12.6099	C6H9NO5	Amino Acid Metabolism	Alanine and aspartate metabolism	N-Acetyl-L-aspartate	1.00857e-10	3.47956e-08	16827	16827	H42 up vs H0
N,N-Dimethylglycine	103.063	12.6299	C4H9NO2	Amino Acid Metabolism	Glycine, serine and threonine metabolis	N,N-Dimethylglycine	0.0151395	0.0347052	0.358505	-2.78936	H42 down vs H0
Lys-Val-Ser	332.206	12.6598	C14H28N4O5	Peptide(tri-)	Basic peptide	Lys-Val-Ser	5.53681e-06	6.58689e-05	1212.96	1212.96	H42 up vs H0
2-deoxyglucose-6-phosphate	246.051	12.6923	C6H15O8P	0	0	Glycerophosphoglycerol	0.0166899	0.0372687	2.86619	2.86619	H42 up vs H0
N-Acetyl-D-glucosamine 6-phosphate	301.056	12.7032	C8H16NO9P	Amino Acid Metabolism	Glutamate metabolism__Aminosugars metab	N-Acetyl-D-glucosamine 6-phosphate	0.00163135	0.00530957	0.00700585	-142.738	H42 down vs H0
Lys-Val	245.174	12.7252	C11H23N3O3	Peptide(di-)	Basic peptide	Lys-Val	0.000311723	0.00143393	706.737	706.737	H42 up vs H0
L-Glutamate	147.053	12.7927	C5H9NO4	Amino Acid Metabolism	Arginine and proline metabolism__Glutam	L-Glutamate	0.00715956	0.0186514	0.338402	-2.95507	H42 down vs H0
Phosphocreatine	211.036	12.8242	C4H10N3O5P	Amino Acid Metabolism	Arginine and proline metabolism		0.000859732	0.0031554	0.00152986	-653.654	H42 down vs H0
L-Homoserine	119.058	12.827	C4H9NO3	Amino Acid Metabolism	Glycine, serine and threonine metabolis	L-Homoserine	0.00971602	0.0242901	0.113161	-8.83699	H42 down vs H0
3-Methylcytosine	125.059	12.9757	C5H7N3O	0	0	5-Methylcytosine	0.000107299	0.000661041	0.0222991	-44.8448	H42 down vs H0
Pyrimidine	80.0374	12.9764	C4H4N2	Nucleotide Metabolism	0	Fomepizole	0.0140529	0.0324298	3.09639	3.09639	H42 up vs H0
D-Aspartate	133.037	12.9952	C4H7NO4	Amino Acid Metabolism	Alanine and aspartate metabolism	D-Aspartate	0.0132373	0.0308573	0.227905	-4.3878	H42 down vs H0
2-Butenoate	86.0368	13.0081	C4H6O2	Lipids: Fatty Acyls	Fatty Acids and Conjugates	2-Butenoate	0.000200761	0.00106069	3.69802	3.69802	H42 up vs H0
Creatine	131.069	13.1251	C4H9N3O2	Amino Acid Metabolism	Glycine, serine and threonine metabolis	beta-Alanine	0.0220833	0.047175	0.470757	-2.12424	H42 down vs H0
L-Glutamine	146.069	13.1334	C5H10N2O3	Amino Acid Metabolism	Glutamate metabolism__Purine metabolism	beta-Alanine	2.74676e-05	0.000217272	0.102086	-9.7957	H42 down vs H0
7-Methyladenine	149.07	13.1708	C6H7N5	Nucleotide Metabolism	BaseExcisionRepair	7-Methyladenine	4.20873e-05	0.000299384	0.0813116	-12.2984	H42 down vs H0
L-Lysine 1,6-lactam	128.095	13.3074	C6H12N2O	Amino Acid Metabolism	0	L-Lysine 1,6-lactam	9.646e-06	9.78786e-05	7.13785	7.13785	H42 up vs H0
Taurine	125.015	13.3626	C2H7NO3S	Lipid Metabolism	Bile acid biosynthesis__Taurine and hyp	Taurine	0.021483	0.0463227	3.48882	3.48882	H42 up vs H0
3-Hydroxyaminophenol	125.048	13.5718	C6H7NO2	0	0		0.0091886	0.023055	0.416637	-2.40017	H42 down vs H0
Orthophosphate	97.9769	13.6121	H3O4P	Energy Metabolism	Oxidative phosphorylation__Photosynthes	Orthophosphate	0.00130166	0.00438119	0.365933	-2.73274	H42 down vs H0
alpha,alpha'-Trehalose 6-phosphate	422.083	13.6531	C12H23O14P	Carbohydrate Metabolism	Starch and sucrose metabolism	alpha,alpha'-Trehalose 6-phosphate	0.000546599	0.00221855	0.238771	-4.18811	H42 down vs H0
2-Hydroxybutane-1,2,4-tricarboxylate	206.042	14.453	C7H10O7	Amino Acid Metabolism	Lysine biosynthesis__Pyruvate metabolis	2-Hydroxybutane-1,2,4-tricarboxylate	0.00436168	0.0124362	0.398494	-2.50945	H42 down vs H0
N-(2,3-Dihydroxybenzoyl)-L-serine	241.059	15.8017	C10H11NO6	0	0	beta-Citryl-L-glutamic acid	0.0021114	0.00650386	0.0869332	-11.5031	H42 down vs H0
beta-Citryl-L-glutamic acid	321.07	15.8072	C11H15NO10	0	0	beta-Citryl-L-glutamic acid	0.000601479	0.00234475	0.162814	-6.14198	H42 down vs H0
N6-Hydroxy-L-lysine	162.1	18.0923	C6H14N2O3	Amino Acid Metabolism	Lysine degradation	N6-Hydroxy-L-lysine	0.00152237	0.00502602	0.246569	-4.05566	H42 down vs H0
Choline	103.1	18.2647	C5H13NO	Amino Acid Metabolism	Glycine, serine and threonine metabolis	Choline	0.00186756	0.00585736	0.375716	-2.66159	H42 down vs H0
L-Lysine	146.106	19.365	C6H14N2O2	Amino Acid Metabolism	Lysine biosynthesis__Lysine degradation	L-Lysine	0.000660499	0.00254606	3.66354	3.66354	H42 up vs H0

## Sheet: 57-hour
Putative Metabolites	Mass	RT	FORMULA	Map	Pathway	BP	p-value(H57 vs. H0)	FDR-stepup (p-value(H57 vs. H0))	Ratio(H57 vs. H0)	Fold-Change(H57 vs. H0)	Fold-Change(H57 vs. H0) (Description)
Cholesterolsulfate	466.312	3.43229	C27H46O4S	Lipids: Sterol lipids	0	Cholesterolsulfate	1.39397e-06	7.88394e-06	4.07311	4.07311	H57 up vs H0
1-20:0-2-18:3-phosphatidylserine	813.552	3.49645	C44H80NO10P	0	0	[PS (18:1/18:1)] 1,2-di-(9E-octadecenoy	0.00241544	0.00446824	2.54345	2.54345	H57 up vs H0
[PS (18:1/18:1)] 1,2-di-(9E-octadecenoyl)-sn-glycero-3-phosphoserine	787.536	3.49799	C42H78NO10P	Lipids: Glycerophospholipids	Glycerophosphoserines	[PS (18:1/18:1)] 1,2-di-(9E-octadecenoy	0.00144802	0.00284653	2.31508	2.31508	H57 up vs H0
PI(16:0/22:3(10Z,13Z,16Z))	888.573	3.50569	C47H85O13P	Lipids: Glycerophospholipids	Glycerophosphoinositols	[PS (18:1/18:1)] 1,2-di-(9E-octadecenoy	0.00544182	0.0091359	2.19872	2.19872	H57 up vs H0
[PS (16:0/18:1)] 1-hexadecanoyl-2-(9Z-octadecenoyl)-sn-glycero-3-phosphoserine	761.521	3.51762	C40H76NO10P	Lipids: Glycerophospholipids	Glycerophosphoserines	Ala-Leu-Gln-Arg	0.00853683	0.0137306	2.25064	2.25064	H57 up vs H0
PI(16:0/18:2(9Z,12Z))	834.525	3.5322	C43H79O13P	Lipids: Glycerophospholipids	Glycerophosphoinositols	[PS (18:1/18:1)] 1,2-di-(9E-octadecenoy	0.000123626	0.000305741	3.06622	3.06622	H57 up vs H0
[PI (16:0/18:1)] 1-hexadecanoyl-2-(9Z-octadecenoyl)-sn-glycero-3-phospho-(1'-myo-inositol)	836.541	3.53294	C43H81O13P	Lipids: Glycerophospholipids	Glycerophosphoinositols	[PS (18:1/18:1)] 1,2-di-(9E-octadecenoy	0.000498108	0.00106407	2.43283	2.43283	H57 up vs H0
[FA (24:0)] 15Z-tetracosenoic acid	366.35	3.5407	C24H46O2	Lipids: Fatty Acyls	Fatty Acids and Conjugates	[FA (24:0)] 15Z-tetracosenoic acid	0.000232012	0.000538232	4.82252	4.82252	H57 up vs H0
[FA (18:1)] 9Z-octadecenamide	281.272	3.55665	C18H35NO	Lipids: Fatty Acyls	Fatty amides	[FA (18:1)] 9Z-octadecenamide	7.30186e-05	0.000196042	3.80254	3.80254	H57 up vs H0
Taxa-4(20),11(12)-dien-5alpha-yl acetate	330.256	3.58247	C22H34O2	Biosynthesis of Secondary Metabolites	Diterpenoid biosynthesis	Taxa-4(20),11(12)-dien-5alpha-yl acetat	0.00665138	0.0110059	3.74582	3.74582	H57 up vs H0
[FA (20:0)] 11Z-eicosenoic acid	310.287	3.58306	C20H38O2	Lipids: Fatty Acyls	Biosynthesis of unsaturated fatty acids	[FA (18:1)] 9Z-octadecenoic acid	0.00299776	0.00542901	5.54466	5.54466	H57 up vs H0
5-O-Methylembelin	308.199	3.58755	C18H28O4	0	0	5-O-Methylembelin	1.3335e-05	4.48838e-05	3426.46	3426.46	H57 up vs H0
Nonadecanoicacid	298.287	3.59431	C19H38O2	Lipids: Fatty Acyls	Fatty Acids and Conjugates	[FA (18:1)] 9Z-octadecenoic acid	0.00144435	0.00284653	5.62283	5.62283	H57 up vs H0
[FA (20:4)] 5Z,8Z,11Z,14Z-eicosatetraenoic acid	304.24	3.60387	C20H32O2	Lipids: Fatty Acyls	Fatty Acids and Conjugates	[FA (18:1)] 9Z-octadecenoic acid	0.0210662	0.0305371	2.9642	2.9642	H57 up vs H0
Icosadienoic acid	308.272	3.60399	C20H36O2	Lipid Metabolism	Biosynthesis of unsaturated fatty acids	[FA (18:1)] 9Z-octadecenoic acid	0.00228829	0.00425586	5.73248	5.73248	H57 up vs H0
[FA methyl(18:0)] 11R,12S-methylene-octadecanoic acid	296.271	3.6045	C19H36O2	Lipids: Fatty Acyls	Fatty Acids and Conjugates	[FA (18:1)] 9Z-octadecenoic acid	0.00778583	0.0127003	5.36972	5.36972	H57 up vs H0
[FA (18:1)] 9Z-octadecenoic acid	282.256	3.60568	C18H34O2	Lipids: Fatty Acyls	Fatty acid biosynthesis__Biosynthesis o	[FA (18:1)] 9Z-octadecenoic acid	0.0322838	0.0450308	3.73714	3.73714	H57 up vs H0
16-hydroxypalmitate	272.235	3.62421	C16H32O3	0	cutin biosynthesis	[FA (18:1)] 9Z-octadecenoic acid	0.0333871	0.0462593	3.05534	3.05534	H57 up vs H0
Linoleate	280.24	3.62933	C18H32O2	Lipids: Fatty Acyls	Linoleic acid metabolism__Biosynthesis	[FA (18:1)] 9Z-octadecenoic acid	0.018803	0.0276044	4.24621	4.24621	H57 up vs H0
[FA (17:0)] heptadecanoic acid	270.256	3.63833	C17H34O2	Lipids: Fatty Acyls	Fatty Acids and Conjugates	[FA (18:1)] 9Z-octadecenoic acid	0.00152054	0.00295542	7.04642	7.04642	H57 up vs H0
[FA methoxy,trihydrox] 1-methoxy-9S,11R,15S-trihydroxy-5Z,13E-prostadiene	354.277	3.65056	C21H38O4	Lipids: Fatty Acyls	Eicosanoids	[FA methyl(4:2/18:2)] methyl 9-butylper	0.0283562	0.0401762	0.209665	-4.76951	H57 down vs H0
[FA methyl(4:2/18:2)] methyl 9-butylperoxy-10,12-octadecadienoate	382.308	3.65068	C23H42O4	Lipids: Fatty Acyls	Fatty Acids and Conjugates	[FA methyl(4:2/18:2)] methyl 9-butylper	0.0158234	0.0236836	0.377262	-2.65068	H57 down vs H0
MG(0:0/22:2(13Z,16Z)/0:0)	410.339	3.65682	C25H46O4	Lipids: Glycerolipids	Monoradylglycerols	[FA methyl(4:2/18:2)] methyl 9-butylper	0.0200102	0.0291288	0.183068	-5.46246	H57 down vs H0
(9Z)-Hexadecenoic acid	254.225	3.67206	C16H30O2	Lipid Metabolism	Fatty acid biosynthesis	[FA (18:1)] 9Z-octadecenoic acid	0.0164474	0.0245548	4.7985	4.7985	H57 up vs H0
[FA (20:0)] eicosanoic acid	312.303	3.67264	C20H40O2	Lipids: Fatty Acyls	Fatty Acids and Conjugates	[FA (20:0)] eicosanoic acid	0.000115874	0.000288639	5.01374	5.01374	H57 up vs H0
omega-Cyclohexylundecanoic acid	268.24	3.67329	C17H32O2	Lipids: Fatty Acyls	Fatty Acids and Conjugates	[FA (18:1)] 9Z-octadecenoic acid	0.0151184	0.0228765	5.17701	5.17701	H57 up vs H0
[FA dimethyl(13:0)] 2,5-dimethyl-2E-tridecenoic acid	240.209	3.6907	C15H28O2	Lipids: Fatty Acyls	Fatty Acids and Conjugates	[FA (18:1)] 9Z-octadecenoic acid	0.00276976	0.0050293	6.11436	6.11436	H57 up vs H0
[FA methyl(14:0)] 12-methyl-tetradecanoic acid	242.225	3.70421	C15H30O2	Lipids: Fatty Acyls	Fatty Acids and Conjugates	Hexadecanoic acid	0.00917075	0.0147159	5.34948	5.34948	H57 up vs H0
(9Z)-Tetradecenoic acid	226.193	3.737	C14H26O2	Lipids: Fatty Acyls	Fatty Acids and Conjugates	(9Z)-Tetradecenoic acid	0.0125873	0.0193868	6.50557	6.50557	H57 up vs H0
CAI-1	214.193	3.75603	C13H26O2	0	0	Dodecanoic acid	0.00753087	0.0123428	4.19442	4.19442	H57 up vs H0
[FA trihydroxy(2:0)] 9S,11R,15S-trihydroxy-2,3-dinor-5Z,13E-prostadienoic acid-cyclo[8S,12R]	326.209	3.75788	C18H30O5	Lipids: Fatty Acyls	Eicosanoids	[FA trihydroxy(2:0)] 9S,11R,15S-trihydr	0.000497373	0.00106407	2.83925	2.83925	H57 up vs H0
2S-Hydroxytetradecanoic acid	244.204	3.76956	C14H28O3	Lipids: Fatty Acyls	Fatty Acids and Conjugates	Hexadecanoic acid	0.0141082	0.0214893	2.80542	2.80542	H57 up vs H0
Dodecanoic acid	200.178	3.77576	C12H24O2	Lipid Metabolism	Fatty acid biosynthesis	Dodecanoic acid	0.0143392	0.0217931	5.23029	5.23029	H57 up vs H0
[FA (7:1)] 2-heptenal	112.089	3.79275	C7H12O	Lipids: Fatty Acyls	Fatty aldehydes	Alizarin	0.000139876	0.00034104	0.482185	-2.07389	H57 down vs H0
[PR] Citronellyl acetate	198.162	3.82234	C12H22O2	Lipids: Prenols	Isoprenoids	Dodecanoic acid	0.0275644	0.0392153	5.13116	5.13116	H57 up vs H0
PE(18:1(11Z)/P-18:1(11Z))	727.552	3.84997	C41H78NO7P	Lipids: Glycerophospholipids	Glycerophosphoethanolamines	[PE (18:1/18:1)] 1-(1Z-octadecenyl)-2-(	0.0344755	0.0475761	13.7322	13.7322	H57 up vs H0
[PE (18:1/18:1)] 1-(1Z-octadecenyl)-2-(9Z-octadecenoyl)-sn-glycero-3-phosphoethanolamine	729.567	3.85028	C41H80NO7P	Lipids: Glycerophospholipids	Glycerophosphoethanolamines	[PE (18:1/18:1)] 1-(1Z-octadecenyl)-2-(	1.10726e-08	3.05604e-07	2978.79	2978.79	H57 up vs H0
[FA (11:0)] undecanoic acid	186.162	3.85576	C11H22O2	Lipids: Fatty Acyls	Fatty Acids and Conjugates	Hexadecanoic acid	0.0164766	0.0245548	3.11959	3.11959	H57 up vs H0
[FA oxo,hydroxy(18:3)] 12-oxo-14,18-dihydroxy-9Z,13E,15Z-octadecatrienoic acid	324.194	3.90925	C18H28O5	Lipids: Fatty Acyls	Fatty Acids and Conjugates	[FA oxo,hydroxy(18:3)] 12-oxo-14,18-dih	0.000659895	0.00139244	2.57163	2.57163	H57 up vs H0
Decanoic acid	172.146	3.92095	C10H20O2	Lipid Metabolism	Fatty acid biosynthesis	Decanoic acid	0.0271836	0.0387535	4.09548	4.09548	H57 up vs H0
butylene	70.0783	3.98274	C5H10	0	0	butylene	0.000753857	0.00157148	0.402814	-2.48253	H57 down vs H0
[ST hydrox] N-(3alpha,7alpha-dihydroxy-5beta-cholan-24-oyl)-taurine	499.297	4.03211	C26H45NO6S	Lipids: Sterol lipids	Bile acid biosynthesis	[ST hydrox] N-(3alpha,7alpha-dihydroxy-	2.4024e-06	1.2012e-05	1730.95	1730.95	H57 up vs H0
[FA methyl(5:1/5:2/8:0)] methyl 8-[3,5-epidioxy-2-(3-hydroperoxy-1-pentenyl)-cyclopentyl]-octanoate	396.251	4.04752	C22H36O6	Lipids: Fatty Acyls	Fatty Acids and Conjugates	[FA methyl(5:1/5:2/8:0)] methyl 8-[3,5-	0.0021212	0.00400994	0.424607	-2.35512	H57 down vs H0
4-Hydroxyphenylacetaldehyde	136.052	4.06773	C8H8O2	Amino Acid Metabolism	Tyrosine metabolism__Alkaloid biosynthe		0.00141664	0.0028008	0.00361916	-276.307	H57 down vs H0
[FA hydroxy(9:1)] 4-hydroxy-2-nonenal	156.115	4.06863	C9H16O2	Lipids: Fatty Acyls	Fatty aldehydes	Nonanoic acid	0.0035414	0.00623359	2.39679	2.39679	H57 up vs H0
Phe-Phe	312.147	4.16124	C18H20N2O3	Peptide(di-)	Hydrophobic peptide		6.44345e-06	2.51185e-05	2928	2928	H57 up vs H0
Avenacoside A	531.261	4.19918	C51H82O23	0	0	Avenacoside A	2.87999e-06	1.35183e-05	1032.54	1032.54	H57 up vs H0
Leu-Leu-Val	343.247	4.2057	C17H33N3O4	Peptide(tri-)	Hydrophobic peptide	Leu-Leu-Val	0.000243237	0.000557196	19.8352	19.8352	H57 up vs H0
Bendiocarb	223.085	4.26457	C11H13NO4	0	0	Bendiocarb	0.0152263	0.0228892	0.077426	-12.9156	H57 down vs H0
Leu-Phe	278.163	4.34194	C15H22N2O3	Peptide(di-)	Hydrophobic peptide		3.44788e-05	0.000101668	160.242	160.242	H57 up vs H0
Glycodeoxycholate	449.314	4.46064	C26H43NO5	Lipid Metabolism	Bile acid biosynthesis	Glycodeoxycholate	1.20265e-06	7.03245e-06	58.2019	58.2019	H57 up vs H0
[PE (20:4)] 1-(5Z,8Z,11Z,14Z-eicosatetraenoyl)-sn-glycero-3-phosphoethanolamine	501.285	4.4728	C25H44NO7P	Lipids: Glycerophospholipids	Glycerophosphoethanolamines	[PE (20:4)] 1-(5Z,8Z,11Z,14Z-eicosatetr	0.0305841	0.0430673	0.105473	-9.48112	H57 down vs H0
[PC (15:0)] 1-pentadecanoyl-sn-glycero-3-phosphocholine	481.317	4.47289	C23H48NO7P	Lipids: Glycerophospholipids	Glycerophosphocholines	[PC (15:0)] 1-pentadecanoyl-sn-glycero-	0.000122659	0.000304441	2.45155	2.45155	H57 up vs H0
[ST hydrox] 3alpha,7alpha-Dihydroxy-5beta-cholan-24-oic Acid	392.293	4.49379	C24H40O4	Lipids: Sterol lipids	Bile acids and derivatives	Ala-Ala-Asp-Arg	0.000152402	0.000368973	153.546	153.546	H57 up vs H0
Quinolin-2-ol	145.053	4.52618	C9H7NO	0	0	Agroclavine	0.0134491	0.020622	2.79888	2.79888	H57 up vs H0
Leucyl-leucine	244.179	4.56417	C12H24N2O3	Peptide(di-)	Hydrophobic peptide	Ile-Val-Pro-Tyr	0.000991947	0.00202498	12.1581	12.1581	H57 up vs H0
Indole-5,6-quinone	147.032	4.56655	C8H5NO2	Amino Acid Metabolism	Tyrosine metabolism	Indole-5,6-quinone	1.0369e-06	6.75697e-06	0.0360625	-27.7297	H57 down vs H0
Taurocholate	515.292	4.58015	C26H45NO7S	Lipid Metabolism	Bile acid biosynthesis__Taurine and hyp	Taurocholate	5.71169e-06	2.26498e-05	29.3684	29.3684	H57 up vs H0
(S)-3-Methyl-2-oxopentanoic acid	130.063	4.61024	C6H10O3	Amino Acid Metabolism	Valine, leucine and isoleucine degradat	(S)-3-Methyl-2-oxopentanoic acid	1.74373e-05	5.59615e-05	17.776	17.776	H57 up vs H0
LPA(0:0/18:2(9Z,12Z))	434.243	4.6133	C21H39O7P	Lipid Metabolism	Glycerolipid metabolism__Glycerophospho	Arg-Leu-Phe-Phe	0.00981541	0.015635	5.98131	5.98131	H57 up vs H0
4-Pyridoxolactone	165.042	4.61859	C8H7NO3	Metabolism of Cofactors and Vitamins	Vitamin B6 metabolism	Indole-5,6-quinone	0.0131988	0.0202832	0.0491997	-20.3253	H57 down vs H0
Phe-Val	264.147	4.63137	C14H20N2O3	Peptide(di-)	Hydrophobic peptide	Phe-Val	0.0320265	0.0448242	16.229	16.229	H57 up vs H0
Tetrahydroharmine	216.126	4.63145	C13H16N2O	0	0	Tetrahydroharmine	1.72829e-06	9.03422e-06	10.371	10.371	H57 up vs H0
Lenacil	234.137	4.69225	C13H18N2O2	0	0	Lenacil	1.24547e-05	4.23338e-05	284.813	284.813	H57 up vs H0
Leu-Leu-Pro	341.231	4.70849	C17H31N3O4	Peptide(tri-)	Hydrophobic peptide	Leu-Leu-Pro	0.000126345	0.00031135	1176.65	1176.65	H57 up vs H0
Leu-Ala-Tyr	365.195	4.71595	C18H27N3O5	Peptide(tri-)	Hydrophobic peptide	Leu-Ala-Tyr	2.20152e-05	6.75132e-05	594.68	594.68	H57 up vs H0
3-(3-Hydroxy-phenyl)-propanoic acid	166.063	4.72329	C9H10O3	Amino Acid Metabolism	Phenylalanine metabolism	3-(3-Hydroxy-phenyl)-propanoic acid	0.00788521	0.0127718	11.0398	11.0398	H57 up vs H0
Phenylpropanoate	150.068	4.75318	C9H10O2	Amino Acid Metabolism	Phenylalanine metabolism	Phenylpropanoate	0.0306858	0.0431226	3.72642	3.72642	H57 up vs H0
5-Methoxyindoleacetate	205.074	4.76679	C11H11NO3	Amino Acid Metabolism	Tryptophan metabolism	5-Methoxyindoleacetate	0.000206887	0.000487208	0.0725148	-13.7903	H57 down vs H0
[FA (7:2)] 2,4-heptadienal	110.073	4.79695	C7H10O	Lipids: Fatty Acyls	Fatty aldehydes	(8S,9S,10S)-8,10-dimethyl-1-octalin	4.22244e-06	1.80962e-05	0.00522837	-191.264	H57 down vs H0
Leu-Val	230.163	4.80558	C11H22N2O3	Peptide(di-)	Hydrophobic peptide	Leu-Val	8.34014e-06	3.07738e-05	84.5686	84.5686	H57 up vs H0
(8S,9S,10S)-8,10-dimethyl-1-octalin	82.0782	4.81245	C12H20	0	geosmin biosynthesis	(8S,9S,10S)-8,10-dimethyl-1-octalin	0.000243874	0.000557196	0.0112306	-89.0427	H57 down vs H0
Phe-Tyr	328.142	4.82928	C18H20N2O4	Peptide(di-)	Hydrophobic peptide	Phe-Tyr	1.16043e-06	6.90258e-06	3553.29	3553.29	H57 up vs H0
8-keto-7-aminoperlagonate	185.105	4.83799	C9H15NO3	0	0	8-keto-7-aminoperlagonate	0.0145298	0.0220343	0.183338	-5.45442	H57 down vs H0
Leu-Leu-Ser	331.211	4.83987	C15H29N3O5	Peptide(tri-)	Hydrophobic peptide	Leu-Leu-Ser	3.92997e-07	3.34775e-06	5322.39	5322.39	H57 up vs H0
Myxochlin B	405.19	4.84295	C20H27N3O6	0	0	Myxochlin B	1.28896e-07	1.56031e-06	9257.36	9257.36	H57 up vs H0
Glycocholate	465.309	4.89227	C26H43NO6	Lipid Metabolism	Bile acid biosynthesis	Glycocholate	2.35319e-06	1.18518e-05	21.236	21.236	H57 up vs H0
Leu-Leu-Asn	358.222	4.9081	C16H30N4O5	Peptide(tri-)	Hydrophobic peptide	Leu-Leu-Ser	2.65172e-05	7.9899e-05	1830.23	1830.23	H57 up vs H0
Cholate	408.288	4.90942	C24H40O5	Lipids: Sterol lipids	Bile acid biosynthesis	Cholate	0.000295901	0.000662895	11.5224	11.5224	H57 up vs H0
Leu-Val-Pro	327.216	4.93511	C16H29N3O4	Peptide(tri-)	Hydrophobic peptide	Leu-Val-Pro	2.55308e-06	1.24727e-05	97.3267	97.3267	H57 up vs H0
Leu-Leu-Gln	372.237	4.9405	C17H32N4O5	Peptide(tri-)	Hydrophobic peptide		0.0042067	0.00723845	93.8753	93.8753	H57 up vs H0
Agroclavine	119.074	4.94233	C16H18N2	0	0	Agroclavine	1.01012e-07	1.26724e-06	7.38724	7.38724	H57 up vs H0
Ala-Val-Val-Pro	384.237	4.94737	C18H32N4O5	Peptide(tetra-)	Hydrophobic peptide	Ala-Val-Val-Pro	0.000304638	0.000680261	3778.15	3778.15	H57 up vs H0
N6-Methyl-2'-deoxyadenosine	265.118	4.95427	C11H15N5O3	0	0	Agroclavine	6.90935e-06	2.66338e-05	151.874	151.874	H57 up vs H0
Nitroethane	75.032	4.97908	C2H5NO2	0	0		6.61404e-05	0.000180383	0.067958	-14.715	H57 down vs H0
N-Phenylacetamide	135.068	4.98098	C8H9NO	0	0	2-Phenylacetamide	2.03489e-05	6.2682e-05	4.24058	4.24058	H57 up vs H0
Leu-Pro-Tyr	391.211	4.99634	C20H29N3O5	Peptide(tri-)	Hydrophobic peptide	Leu-Pro-Tyr	0.0117275	0.0181435	97.2504	97.2504	H57 up vs H0
Phe-Ala	236.116	5.0024	C12H16N2O3	Peptide(di-)	Hydrophobic peptide	Phe-Ala	1.45933e-06	8.05932e-06	709.401	709.401	H57 up vs H0
Leu-Val-Gly	287.185	5.00391	C13H25N3O4	Peptide(tri-)	Hydrophobic peptide	Leu-Val-Gly	2.7259e-08	5.45476e-07	30719.7	30719.7	H57 up vs H0
N3-methylthymine	140.058	5.00541	C6H8N2O2	0	0		1.31367e-08	3.35716e-07	240.423	240.423	H57 up vs H0
Phe-Pro	262.132	5.00614	C14H18N2O3	Peptide(di-)	Hydrophobic peptide	Phe-Pro	7.66338e-06	2.88947e-05	421.933	421.933	H57 up vs H0
3-acetamidopropanal	115.063	5.00707	C5H9NO2	0	spermine and spermidine degradation	Agroclavine	4.03377e-07	3.35338e-06	7.66224	7.66224	H57 up vs H0
Diacetylmonoxime	101.048	5.0117	C4H7NO2	0	0	Agroclavine	0.0216576	0.0312058	7.86188	7.86188	H57 up vs H0
Chaksine	225.148	5.02629	C22H38N6O4	0	0	Chaksine	7.00946e-06	2.68696e-05	3.07205	3.07205	H57 up vs H0
Leu-Pro-Pro	325.2	5.0479	C16H27N3O4	Peptide(tri-)	Hydrophobic peptide	Leu-Pro-Pro	0.00160486	0.00309318	31.0347	31.0347	H57 up vs H0
Leu-Gln-Pro	356.206	5.06178	C16H28N4O5	Peptide(tri-)	Hydrophobic peptide		4.99931e-08	8.30334e-07	115.868	115.868	H57 up vs H0
valeronitrile	83.0735	5.0827	C5H9N	0	0	Piperideine	3.20238e-06	1.46334e-05	5.20625	5.20625	H57 up vs H0
Glu-Phe-Val	393.19	5.17828	C19H27N3O6	Peptide(tri-)	Hydrophobic peptide	Dethiobiotin	6.01819e-06	2.37289e-05	98.4511	98.4511	H57 up vs H0
p-Benzenediol	110.037	5.89828	C6H6O2	Amino Acid Metabolism	Tyrosine metabolism__gamma-Hexachlorocy	3-Sulfocatechol	0.0114362	0.0177725	0.386432	-2.58777	H57 down vs H0
2-Hydroxypyridine	95.0371	6.20671	C5H5NO	0	0	2-Hydroxypyridine	1.67617e-08	3.8552e-07	0.0808358	-12.3708	H57 down vs H0
(Z)-Phenylacetaldehyde oxime	135.068	6.24693	C8H9NO	Xenobiotics Biodegradation and Metaboli	Styrene degradation	2-Phenylacetamide	0.000109726	0.000276317	9.16809	9.16809	H57 up vs H0
4-Nitroaniline	69.0215	6.3449	C6H6N2O2	0	0	Urocanate	8.8361e-05	0.000229207	0.378136	-2.64455	H57 down vs H0
N-Acetylmethionine	191.062	6.43037	C7H13NO3S	0	0	N-Acetylmethionine	5.09298e-10	3.19469e-08	3813.31	3813.31	H57 up vs H0
Triacetylene	74.0156	6.67757	C6H2	0	0	9,10-Anthraquinone	0.00656906	0.0108958	0.352065	-2.84038	H57 down vs H0
Arene oxide	94.0418	6.71828	C6H6O	0	0	9,10-Anthraquinone	0.000336742	0.000744718	0.186467	-5.36289	H57 down vs H0
Gly-His	212.091	7.21836	C8H12N4O3	Peptide(di-)	Basic peptide	Gly-His	0.0151858	0.0228892	0.0424085	-23.5802	H57 down vs H0
Pyridine	79.0421	7.2654	C5H5N	0	0	Pyridine	0.00191385	0.00364795	0.268869	-3.71929	H57 down vs H0
D-Tyrosine	181.074	7.27036	C9H11NO3	Amino Acid Metabolism	0	Otonecine	0.0109028	0.0170588	0.166992	-5.98833	H57 down vs H0
Phosphonoacetaldehyde	123.993	7.34806	C2H5O4P	Amino Acid Metabolism	Aminophosphonate metabolism	Phosphonoacetaldehyde	0.0113735	0.0177149	2.04694	2.04694	H57 up vs H0
5-Hydroxypentanoate	118.063	7.35762	C5H10O3	Lipids: Fatty Acyls	Fatty Acids and Conjugates	5-Hydroxypentanoate	0.000375824	0.000828494	12.1653	12.1653	H57 up vs H0
LysoPE(0:0/18:1(11Z))	479.302	7.35838	C23H46NO7P	Lipids: Glycerophospholipids	Glycerophosphoethanolamines	[PE (18:1)] 1-(9Z-octadecenoyl)-sn-glyc	0.0219759	0.0315903	0.35969	-2.78017	H57 down vs H0
(S)-Methylmalonate semialdehyde	102.032	7.36099	C4H6O3	Amino Acid Metabolism	Valine, leucine and isoleucine degradat	2-Oxobutanoate	8.00225e-06	3.00085e-05	13.1194	13.1194	H57 up vs H0
Ile-Val-Gly-Pro	384.238	7.36241	C18H32N4O5	Peptide(tetra-)	Hydrophobic peptide	Ala-Val-Val-Pro	1.12793e-06	6.82695e-06	16633	16633	H57 up vs H0
Ala-Leu-Pro-Ser	386.216	7.36565	C17H30N4O6	Peptide(tetra-)	Hydrophobic peptide	2-Phenylacetamide	0.00248981	0.00457613	120.3	120.3	H57 up vs H0
Quinolin-4-ol	145.053	7.36586	C9H7NO	0	0	Isoquinoline	0.00138207	0.00274031	0.438241	-2.28185	H57 down vs H0
2-hydroxy-4-methylthiobutanoate	150.035	7.36713	C5H10O3S	0	dimethylsulfoniopropionate biosynthesis	5-Hydroxypentanoate	7.42803e-07	5.17711e-06	1707.61	1707.61	H57 up vs H0
Val-Val-Ala	287.185	7.36955	C13H25N3O4	Peptide(tri-)	Hydrophobic peptide	Leu-Val-Gly	2.03332e-07	2.09402e-06	11459.3	11459.3	H57 up vs H0
Methohexital	262.132	7.3698	C14H18N2O3	Xenobiotics Drugs etc	0	Leu-Pro	4.86056e-10	3.19469e-08	18951.1	18951.1	H57 up vs H0
Albine	232.158	7.37189	C14H20N2O	0	0	Albine	5.31528e-08	8.33533e-07	215.999	215.999	H57 up vs H0
[FA methyl,hydroxy(5:0)] 3R-methyl-3,5-dihydroxy-pentanoic acid	148.074	7.37237	C6H12O4	Lipids: Fatty Acyls	Fatty Acids and Conjugates	[FA methyl,hydroxy(5:0)] 3R-methyl-3,5-	0.000507297	0.00108035	3.91849	3.91849	H57 up vs H0
Carbetamide	236.116	7.37293	C12H16N2O3	0	0	Phe-Ala	1.96131e-05	6.12356e-05	3269.37	3269.37	H57 up vs H0
Girgensonine	216.126	7.37424	C13H16N2O	0	0	Agroclavine	5.22785e-09	1.80361e-07	949.838	949.838	H57 up vs H0
Leu-Pro	228.148	7.37448	C11H20N2O3	Peptide(di-)	Hydrophobic peptide	Leu-Pro	1.12321e-09	5.53583e-08	37.8127	37.8127	H57 up vs H0
1-Pyrroline	69.0579	7.37523	C4H7N	Amino Acid Metabolism	Arginine and proline metabolism	1-Pyrroline	0.00322554	0.00575096	3.40701	3.40701	H57 up vs H0
Hippurate	179.058	7.37661	C9H9NO3	Amino Acid Metabolism	Phenylalanine metabolism	Hippurate	0.00565805	0.00947586	0.041098	-24.3321	H57 down vs H0
Leu-Thr	232.142	7.37692	C10H20N2O4	Peptide(di-)	Hydrophobic peptide	Leu-Val-Gly	5.94958e-07	4.4142e-06	2907.66	2907.66	H57 up vs H0
[FA hydroxy(2:0/2:0)] 9S,15S-dihydroxy-11R,18-diacetoxy-5Z,13E-prostadienoic acid	454.257	7.37848	C24H38O8	Lipids: Fatty Acyls	Eicosanoids	Agroclavine	2.80689e-06	1.33569e-05	174.275	174.275	H57 up vs H0
Porphobilinogen	226.095	7.38299	C10H14N2O4	Metabolism of Cofactors and Vitamins	Porphyrin and chlorophyll metabolism	Agroclavine	3.46716e-07	3.0726e-06	756.26	756.26	H57 up vs H0
Piperidine	85.0891	7.38353	C5H11N	0	piperine biosynthesis	1-Pyrroline	2.70575e-07	2.56804e-06	4.96384	4.96384	H57 up vs H0
Indoxylsulfate	213.01	7.3842	C8H7NO4S	0	0	Indoxylsulfate	0.0139518	0.0212981	0.456703	-2.18961	H57 down vs H0
Indolelactate	205.074	7.38428	C11H11NO3	Amino Acid Metabolism	Tryptophan metabolism	Indolelactate	0.00784907	0.0127718	2.49193	2.49193	H57 up vs H0
3-hydroxypyridine	95.0371	7.38569	C5H5NO	0	0	2-Hydroxypyridine	0.00338951	0.00598149	0.0402377	-24.8523	H57 down vs H0
Leu-Gln-Tyr	422.217	7.38698	C20H30N4O6	Peptide(tri-)	Hydrophobic peptide		9.65812e-05	0.00024866	1268.19	1268.19	H57 up vs H0
Ala-Val-Asp-Pro	400.196	7.38788	C17H28N4O7	Peptide(tetra-)	Hydrophobic peptide	Ala-Val-Asp-Pro	4.65725e-06	1.95945e-05	885.989	885.989	H57 up vs H0
5,6-Dihydrothymine	128.059	7.38916	C5H8N2O2	Nucleotide Metabolism	Pyrimidine metabolism	Agroclavine	1.99246e-07	2.08303e-06	239.975	239.975	H57 up vs H0
Asn-Leu-Leu-Ser	445.254	7.39246	C19H35N5O7	Peptide(tetra-)	Hydrophobic peptide	Asn-Leu-Leu-Ser	2.2642e-05	6.91281e-05	880.851	880.851	H57 up vs H0
Thymine	126.043	7.39422	C5H6N2O2	Nucleotide Metabolism	Pyrimidine metabolism	Thymine	3.03587e-08	5.81875e-07	0.109147	-9.16195	H57 down vs H0
Val-Asp-Pro	329.159	7.39658	C14H23N3O6	Peptide(tri-)	Hydrophobic peptide	Leu-Val-Gly	5.05457e-06	2.08841e-05	2801.85	2801.85	H57 up vs H0
Dethiobiotin	214.132	7.39823	C10H18N2O3	Metabolism of Cofactors and Vitamins	Biotin metabolism	Leu-Pro	6.74568e-09	2.11569e-07	56.7732	56.7732	H57 up vs H0
3-Amino-2-piperidone	114.079	7.39944	C5H10N2O	0	0	Agroclavine	2.44581e-09	1.05475e-07	508.913	508.913	H57 up vs H0
Ala-Tyr	252.111	7.40651	C12H16N2O4	Peptide(di-)	Hydrophobic peptide	Phe-Ala	7.81778e-08	1.0577e-06	1940.43	1940.43	H57 up vs H0
Isoquinoline	129.058	7.40693	C9H7N	0	0	Isoquinoline	5.09729e-05	0.00014182	0.126545	-7.90233	H57 down vs H0
Ile-Pro-Pro	325.2	7.41295	C16H27N3O4	Peptide(tri-)	Hydrophobic peptide	Leu-Pro	1.09644e-06	6.81573e-06	62.5298	62.5298	H57 up vs H0
Met-Pro	246.104	7.42339	C10H18N2O3S	Peptide(di-)	Hydrophobic peptide	Met-Pro	2.58493e-06	1.24727e-05	140.251	140.251	H57 up vs H0
Thymidine	242.09	7.43035	C10H14N2O5	Nucleotide Metabolism	Pyrimidine metabolism	Thymine	0.000103007	0.000263241	0.00532608	-187.755	H57 down vs H0
beta-Aminopropion aldehyde	73.0527	7.47024	C3H7NO	Amino Acid Metabolism	beta-Alanine metabolism	Agroclavine	1.92081e-07	2.07062e-06	4.03195	4.03195	H57 up vs H0
3-Indoleacetonitrile	78.0343	7.48668	C10H8N2	Amino Acid Metabolism	Tryptophan metabolism	3-Indoleacetonitrile	0.000441759	0.000964601	0.189071	-5.28902	H57 down vs H0
3-Hydroxypropenoate	88.0161	7.50552	C3H4O3	0	0	3-Oxopropanoate	0.00269085	0.00489892	4.02334	4.02334	H57 up vs H0
N-Ethylmaleimide	125.048	7.50969	C6H7NO2	0	0	N-Ethylmaleimide	5.27696e-07	4.13761e-06	0.0478564	-20.8958	H57 down vs H0
Methylimidazoleacetic acid	140.059	7.6857	C6H8N2O2	Amino Acid Metabolism	Histidine metabolism	Methylimidazoleacetic acid	0.0151965	0.0228892	0.240977	-4.14978	H57 down vs H0
4-Hydroxybutanoic acid	104.047	7.74889	C4H8O3	Carbohydrate Metabolism	Butanoate metabolism	4-Hydroxybutanoic acid	9.53694e-09	2.86108e-07	33.6606	33.6606	H57 up vs H0
Nicotine	81.0578	7.80384	C10H14N2	Biosynthesis of Secondary Metabolites	Alkaloid biosynthesis II	Nicotine	0.00429825	0.00735929	0.436243	-2.2923	H57 down vs H0
4-Hydroxy-3-nitrosobenzamide	166.038	7.99821	C7H6N2O3	0	0		4.62401e-06	1.9574e-05	0.00169272	-590.764	H57 down vs H0
3-Oxohexobarbital	250.095	8.03865	C12H14N2O4	0	0		1.05878e-05	3.68969e-05	0.00365756	-273.406	H57 down vs H0
N2-(D-1-Carboxyethyl)-L-lysine	218.127	8.08606	C9H18N2O4	Amino Acid Metabolism	Lysine degradation	4-Hydroxybutanoic acid	2.33643e-07	2.33643e-06	62.8056	62.8056	H57 up vs H0
2,4-Dinitrophenylhydrazine	198.039	8.11669	C6H6N4O4	0	0	2,4-Dinitrophenylhydrazine	0.00413931	0.00715821	0.0164261	-60.8788	H57 down vs H0
2,4-Dinitroaniline	183.028	8.24166	C6H5N3O4	0	0	2,4-Dinitroaniline	0.00328515	0.00582714	0.0185792	-53.8237	H57 down vs H0
Ricinine	164.059	8.26539	C8H8N2O2	0	0	Ricinine	0.000235182	0.000542727	0.0324588	-30.8083	H57 down vs H0
Justicidin B	364.094	8.34652	C21H16O6	0	0		0.0216632	0.0312058	24.7801	24.7801	H57 up vs H0
Asn-Trp-Asp-Pro	530.213	8.34809	C24H30N6O8	Peptide(tetra-)	Hydrophobic peptide	Asn-Trp-Asp-Pro	5.5499e-07	4.25492e-06	6700.34	6700.34	H57 up vs H0
Hypoxanthine	136.038	8.42792	C5H4N4O	Nucleotide Metabolism	Purine metabolism	Hypoxanthine	0.000112678	0.00028272	3.43964	3.43964	H57 up vs H0
Asp-Pro-Tyr	393.154	8.4505	C18H23N3O7	Peptide(tri-)	Hydrophobic peptide	Asp-Pro-Tyr	7.45665e-06	2.82697e-05	207.043	207.043	H57 up vs H0
Deoxyuridine	228.075	8.45538	C9H12N2O5	Nucleotide Metabolism	Pyrimidine metabolism		0.00134411	0.00268045	0.00931535	-107.35	H57 down vs H0
5-Acetylamino-6-amino-3-methyluracil	198.075	8.48552	C7H10N4O3	Biosynthesis of Secondary Metabolites	Caffeine metabolism	5-Acetylamino-6-amino-3-methyluracil	0.00112822	0.0022829	0.0078203	-127.872	H57 down vs H0
Borreline	266.142	8.63677	C17H18N2O	0	0	Borreline	0.000690823	0.00145326	68.3564	68.3564	H57 up vs H0
3-Methylbut-2-enal	84.0575	8.66945	C5H8O	Biosynthesis of Secondary Metabolites	Zeatin biosynthesis	Urocanate	1.01176e-05	3.56181e-05	0.178293	-5.60873	H57 down vs H0
sorbate	112.052	8.67734	C6H8O2	Lipids: Fatty Acyls	Fatty Acids and Conjugates	Urocanate	5.44402e-06	2.18394e-05	0.209171	-4.78079	H57 down vs H0
Maleimide	97.0164	8.68613	C4H3NO2	0	0	Urocanate	1.03651e-05	3.63043e-05	0.184766	-5.41224	H57 down vs H0
2-Phenylacetamide	135.068	8.69628	C8H9NO	Amino Acid Metabolism	Phenylalanine metabolism__Styrene degra	2-Phenylacetamide	3.99773e-08	7.12011e-07	14.6839	14.6839	H57 up vs H0
Urocanate	69.0215	8.69711	C6H6N2O2	Amino Acid Metabolism	Histidine metabolism	Urocanate	3.60257e-05	0.000105778	0.01398	-71.5306	H57 down vs H0
Brunfelsamidine	109.064	8.72265	C5H7N3	0	0	Brunfelsamidine	8.70541e-07	5.83178e-06	5.78744	5.78744	H57 up vs H0
Riboflavin	376.139	8.72534	C17H20N4O6	Metabolism of Cofactors and Vitamins	Riboflavin metabolism	Pantothenate	0.00249366	0.00457613	0.0414462	-24.1277	H57 down vs H0
2-amino-4-methylphenol	123.069	8.74454	C7H9NO	0	0	Urocanate	1.56463e-05	5.13436e-05	0.215333	-4.64397	H57 down vs H0
Iminoglycine	73.0164	8.74787	C2H3NO2	Metabolism of Cofactors and Vitamins	Thiamine metabolism	Urocanate	1.01035e-05	3.56181e-05	0.254165	-3.93445	H57 down vs H0
Trp-Gln-Tyr	495.212	8.78618	C25H29N5O6	Peptide(tri-)	Hydrophobic peptide	Trp-Gln-Tyr	5.17455e-08	8.30334e-07	7092.64	7092.64	H57 up vs H0
Ala-Ala-Pro-Tyr	420.2	8.80325	C20H28N4O6	Peptide(tetra-)	Hydrophobic peptide	Ala-Ala-Pro-Tyr	2.48886e-06	1.23548e-05	131.226	131.226	H57 up vs H0
Sinapyl alcohol	210.089	8.80934	C11H14O4	Biosynthesis of Secondary Metabolites	Phenylpropanoid biosynthesis	Sinapyl alcohol	0.0068568	0.0112916	0.104506	-9.56886	H57 down vs H0
Asn-Leu-Pro-Ser	429.222	8.83132	C18H31N5O7	Peptide(tetra-)	Hydrophobic peptide	Asn-Leu-Pro-Ser	9.55343e-06	3.41548e-05	369.261	369.261	H57 up vs H0
N-Hydroxy-2-acetamidofluorene	239.095	8.84928	C15H13NO2	0	0	Ala-Asn-Ser-Tyr	0.00048572	0.00104407	0.00807579	-123.827	H57 down vs H0
Homocysteinesulfinicacid	167.025	8.94476	C4H9NO4S	0	0	Homocysteinesulfinicacid	3.35411e-06	1.50282e-05	4.25451	4.25451	H57 up vs H0
3,5-dihydro-5-methylidene-4H-imidazol-4-one	196.096	8.95221	C8H12N4O2	0	0	1H-Imidazole-4-ethanamine	3.47337e-07	3.0726e-06	264.532	264.532	H57 up vs H0
Ala-Pro-Ser-Tyr	436.196	8.97413	C20H28N4O7	Peptide(tetra-)	Hydrophobic peptide	Ala-Trp-Ser-Tyr	6.86614e-08	9.66864e-07	757.084	757.084	H57 up vs H0
Asn-Leu-Thr-Pro	443.238	8.97657	C19H33N5O7	Peptide(tetra-)	Hydrophobic peptide	Asn-Leu-Thr-Pro	4.30069e-05	0.000122623	222.044	222.044	H57 up vs H0
3-(4-Hydroxyphenyl)lactate	182.058	8.99505	C9H10O4	Amino Acid Metabolism	Tyrosine metabolism	3-(4-Hydroxyphenyl)lactate	8.08202e-05	0.000215312	5.74268	5.74268	H57 up vs H0
Leu-Asn	245.138	9.00006	C10H19N3O4	Peptide(di-)	Hydrophobic peptide	Leu-Asn	2.22334e-06	1.14485e-05	12.8032	12.8032	H57 up vs H0
1H-Imidazole-4-ethanamine	111.08	9.0181	C5H9N3	Amino Acid Metabolism	Histidine metabolism	1H-Imidazole-4-ethanamine	7.10266e-07	5.0524e-06	120.42	120.42	H57 up vs H0
Met-Ser	236.083	9.07876	C8H16N2O4S	Peptide(di-)	Hydrophobic peptide	Leu-Asn	7.76318e-08	1.0577e-06	347.844	347.844	H57 up vs H0
Tauropine	197.036	9.08712	C5H11NO5S	0	0	Tauropine	1.71728e-05	5.53702e-05	17.037	17.037	H57 up vs H0
L-a-glutamyl-L-Lysine	275.148	9.0877	C11H21N3O5	Peptide(di-)	Basic peptide	L-a-glutamyl-L-Lysine	7.85819e-05	0.000210161	276.629	276.629	H57 up vs H0
Thr-Tyr	282.122	9.09013	C13H18N2O5	Peptide(di-)	Hydrophobic peptide	Thr-Tyr	1.71389e-06	9.02738e-06	667.841	667.841	H57 up vs H0
Hexazinone	126.079	9.12866	C12H20N4O2	0	0	Hexazinone	1.46492e-06	8.05932e-06	10.5402	10.5402	H57 up vs H0
Ile-Thr-Ser-Ser	406.207	9.20178	C16H30N4O8	Peptide(tetra-)	Hydrophobic peptide		3.8906e-07	3.34775e-06	635.795	635.795	H57 up vs H0
Ala-Phe-Val-Asp	450.212	9.20804	C21H30N4O7	Peptide(tetra-)	Hydrophobic peptide	Ala-Phe-Val-Asp	1.888e-05	5.95777e-05	477.07	477.07	H57 up vs H0
Lys-Phe-Cys	396.183	9.23143	C18H28N4O4S	Peptide(tri-)	Basic peptide	Lys-Phe-Cys	6.67075e-05	0.000181213	1872.88	1872.88	H57 up vs H0
Leu-Gln-His	396.213	9.24609	C17H28N6O5	Peptide(tri-)	Basic peptide		3.33589e-08	6.22097e-07	384.118	384.118	H57 up vs H0
Adenine	135.054	9.25319	C5H5N5	Nucleotide Metabolism	Purine metabolism__Zeatin biosynthesis	Adenine	0.0177923	0.0262885	0.308704	-3.23935	H57 down vs H0
(R)-3-Hydroxybutanoate	104.047	9.25613	C4H8O3	Lipid Metabolism	Synthesis and degradation of ketone bod	(R)-3-Hydroxybutanoate	0.000173295	0.000415186	5.03937	5.03937	H57 up vs H0
3-Methoxy-4-hydroxyphenylethyleneglycolsulfate	264.03	9.26639	C9H12O7S	0	0	3-Methoxy-4-hydroxyphenylethyleneglycol	0.00454223	0.00773861	0.0589048	-16.9765	H57 down vs H0
Glu-Leu-Leu-Gln	501.28	9.26838	C22H39N5O8	Peptide(tetra-)	Hydrophobic peptide	Ala-Phe-Val-Asp	5.1243e-07	4.11135e-06	869.503	869.503	H57 up vs H0
Ala-Val-Asn-Pro	399.212	9.26904	C17H29N5O6	Peptide(tetra-)	Hydrophobic peptide		1.67141e-07	1.89061e-06	762.676	762.676	H57 up vs H0
Leu-Phe-Asp	393.19	9.28709	C19H27N3O6	Peptide(tri-)	Hydrophobic peptide	6-Hydroxy-5-methoxyindoleglucuronide	0.000232454	0.000538232	53.3259	53.3259	H57 up vs H0
Asn-Gln-Tyr-Tyr	586.238	9.30226	C27H34N6O9	Peptide(tetra-)	Hydrophobic peptide	Asn-Gln-Tyr-Tyr	0.00335925	0.00594329	134.43	134.43	H57 up vs H0
Leu-Gln-Ser	346.185	9.30897	C14H26N4O6	Peptide(tri-)	Hydrophobic peptide	Leu-Gln-Ser	1.80588e-05	5.74218e-05	521.191	521.191	H57 up vs H0
Asp-Leu-Leu-Gln	487.265	9.31154	C21H37N5O8	Peptide(tetra-)	Hydrophobic peptide	Ala-Phe-Thr-Gln	3.10634e-06	1.42892e-05	2058.59	2058.59	H57 up vs H0
6-Hydroxy-5-methoxyindoleglucuronide	339.096	9.37483	C15H17NO8	0	0	6-Hydroxy-5-methoxyindoleglucuronide	1.3614e-06	7.76337e-06	141.049	141.049	H57 up vs H0
5-Methylcytosine	125.059	9.37639	C5H7N3O	Nucleotide Metabolism	Pyrimidine metabolism	5-Methylcytosine	3.96473e-06	1.74285e-05	0.00246281	-406.041	H57 down vs H0
Homolanthionine	268.073	9.40283	C8H16N2O6S	0	0	Homolanthionine	0.010771	0.0168908	0.481677	-2.07608	H57 down vs H0
Dihydroclavaminic acid	200.08	9.40991	C8H12N2O4	Biosynthesis of Secondary Metabolites	Clavulanic acid biosynthesis	Dihydroclavaminic acid	5.16994e-06	2.12337e-05	6.20463	6.20463	H57 up vs H0
Ala-Leu-Ser-Ser	376.196	9.41632	C15H28N4O7	Peptide(tetra-)	Hydrophobic peptide	Ala-Leu-Ser-Ser	8.93624e-12	2.05534e-09	15949.8	15949.8	H57 up vs H0
3',5'-Cyclic AMP	329.053	9.43961	C10H12N5O6P	Nucleotide Metabolism	Purine metabolism	3',5'-Cyclic AMP	3.0018e-06	1.39949e-05	0.000430459	-2323.1	H57 down vs H0
L-2-Aminoadipate	161.069	9.45641	C6H11NO4	Amino Acid Metabolism	Lysine biosynthesis__Lysine degradation	L-2-Aminoadipate	0.00378124	0.00658853	3.39083	3.39083	H57 up vs H0
N6-Acetyl-N6-hydroxy-L-lysine	204.111	9.47185	C8H16N2O4	Amino Acid Metabolism	Lysine degradation	Dihydroclavaminic acid	9.1984e-06	3.30567e-05	11.0874	11.0874	H57 up vs H0
Trp-Ala-Gly	166.074	9.50277	C16H20N4O4	Peptide(tri-)	Hydrophobic peptide	Trp-Ala-Gly	2.71691e-07	2.56804e-06	0.000338349	-2955.53	H57 down vs H0
5,6-Dihydroxyindole	149.048	9.51234	C8H7NO2	Amino Acid Metabolism	Tyrosine metabolism	Aniline	1.04537e-06	6.75697e-06	0.0239311	-41.7867	H57 down vs H0
N-Acetyl-4-O-acetylneuraminate	351.117	9.51727	C13H21NO10	0	0	N-Acetyl-4-O-acetylneuraminate	3.07855e-05	9.1516e-05	0.00391915	-255.157	H57 down vs H0
D-Proline	115.063	9.51982	C5H9NO2	Amino Acid Metabolism	Arginine and proline metabolism	D-Proline	1.96573e-08	4.2386e-07	7.32406	7.32406	H57 up vs H0
Trp-Gln-Gln	460.208	9.52795	C21H28N6O6	Peptide(tri-)	Hydrophobic peptide	Trp-Gln-Gln	2.87596e-05	8.62789e-05	159.184	159.184	H57 up vs H0
Val-Gly-Pro	271.153	9.58578	C12H21N3O4	Peptide(tri-)	Hydrophobic peptide	Val-Gly-Pro	1.63587e-07	1.88125e-06	6822.6	6822.6	H57 up vs H0
(R)-Lactate	90.0318	9.59438	C3H6O3	Carbohydrate Metabolism	Pyruvate metabolism	(R)-Lactate	6.6512e-09	2.11569e-07	84.5102	84.5102	H57 up vs H0
Nicotyrine	158.084	9.6005	C10H10N2	0	0	Nicotyrine	3.32006e-06	1.49728e-05	29.5263	29.5263	H57 up vs H0
N2-Acetyl-L-aminoadipate	203.08	9.68623	C8H13NO5	Amino Acid Metabolism	Lysine biosynthesis	N2-Acetyl-L-aminoadipate	0.000789313	0.00163551	0.456941	-2.18847	H57 down vs H0
Met-Trp-Asp	450.158	9.69777	C20H26N4O6S	Peptide(tri-)	Hydrophobic peptide	Met-Trp-Asp	2.67686e-09	1.08649e-07	1823.66	1823.66	H57 up vs H0
N-Benzylformamide	135.068	9.75462	C8H9NO	0	0	2-Phenylacetamide	8.72643e-05	0.000228077	3.89146	3.89146	H57 up vs H0
1-Methyluric acid	182.044	9.78263	C6H6N4O3	Biosynthesis of Secondary Metabolites	Caffeine metabolism	1-Methyluric acid	0.00224545	0.00421022	0.0140744	-71.0512	H57 down vs H0
3-ureidoacrylate	130.038	9.79153	C4H6N2O3	0	0	3-ureidoacrylate	0.000104719	0.000264841	0.0031785	-314.613	H57 down vs H0
Glu-Gln-Pro-Tyr	535.228	9.8033	C24H33N5O9	Peptide(tetra-)	Hydrophobic peptide		4.99429e-06	2.08703e-05	1682.76	1682.76	H57 up vs H0
Creatinine	113.059	9.81468	C4H7N3O	Amino Acid Metabolism	Arginine and proline metabolism	Creatinine	1.18448e-06	6.98538e-06	0.294229	-3.39872	H57 down vs H0
Pyrazinamide	123.043	9.8343	C5H5N3O	0	0	Creatinine	0.00100087	0.00203716	0.315954	-3.16501	H57 down vs H0
7-Methylxanthine	166.049	9.85362	C6H6N4O2	Biosynthesis of Secondary Metabolites	Caffeine metabolism	Creatinine	0.00182669	0.00349145	0.314992	-3.17468	H57 down vs H0
5-Hydroxy-L-tryptophan	220.085	9.8607	C11H12N2O3	Amino Acid Metabolism	Tryptophan metabolism	5-Hydroxy-L-tryptophan	0.028096	0.0398894	22.65	22.65	H57 up vs H0
dTTP	240.995	9.86217	C10H17N2O14P3	Nucleotide Metabolism	Pyrimidine metabolism	dTTP	3.09032e-05	9.1516e-05	0.155784	-6.41916	H57 down vs H0
3-Methylguanine	165.065	9.92423	C6H7N5O	0	0	Orotate(Fragment)	0.000525732	0.00111617	0.196516	-5.08863	H57 down vs H0
Ala-Gly-Tyr	309.133	9.94144	C14H19N3O5	Peptide(tri-)	Hydrophobic peptide	Ala-Gly-Tyr	4.33257e-05	0.000123024	465.347	465.347	H57 up vs H0
Orotate(Fragment)	112.027	9.96334	C4H4N2O2	Nucleotide Metabolism	Pyrimidine metabolism	Orotate(Fragment)	5.30708e-06	2.14347e-05	0.16696	-5.98948	H57 down vs H0
Mercaptopyruvate	119.988	9.97723	C3H4O3S	Amino Acid Metabolism	Cysteine metabolism	Mercaptopyruvate	0.00147801	0.00289724	0.00430367	-232.36	H57 down vs H0
Orotate	156.017	9.99657	C5H4N2O4	Nucleotide Metabolism	Pyrimidine metabolism	Orotate	5.85164e-08	8.77747e-07	0.0670159	-14.9218	H57 down vs H0
L-1-Pyrroline-3-hydroxy-5-carboxylate	129.043	10.0297	C5H7NO3	Amino Acid Metabolism	Arginine and proline metabolism	L-1-Pyrroline-3-hydroxy-5-carboxylate	5.12236e-08	8.30334e-07	12.2985	12.2985	H57 up vs H0
Dap	109.064	10.0832	C5H7N3	0	0	L-Lysine 1,6-lactam	4.1276e-08	7.12011e-07	3.91677	3.91677	H57 up vs H0
L-Arabinose	150.053	10.0863	C5H10O5	Carbohydrate Metabolism	Pentose and glucuronate interconversion	D-Xylulose	0.000284142	0.000640712	3.62351	3.62351	H57 up vs H0
L-Phenylalanine	165.079	10.1095	C9H11NO2	Amino Acid Metabolism	Phenylalanine metabolism__Phenylalanine	L-Phenylalanine	8.53856e-07	5.77608e-06	27.127	27.127	H57 up vs H0
Ala-Tyr-His	389.17	10.1168	C18H23N5O5	Peptide(tri-)	Basic peptide	Ala-Tyr-His	8.69143e-05	0.000228026	112.536	112.536	H57 up vs H0
5-6-Dihydrouridine	246.085	10.122	C9H14N2O6	0	0	5-6-Dihydrouridine	0.00376235	0.00657221	0.267761	-3.73468	H57 down vs H0
N-Acetylornithine	174.1	10.1482	C7H14N2O3	Amino Acid Metabolism	Arginine and proline metabolism	N-Acetylornithine	1.15827e-05	3.95645e-05	883.256	883.256	H57 up vs H0
Ala-Leu-Asp-Ser	404.191	10.1537	C16H28N4O8	Peptide(tetra-)	Hydrophobic peptide	Ala-Leu-Asp-Ser	5.02097e-06	2.08703e-05	1526.45	1526.45	H57 up vs H0
Ala-Thr-Thr-Tyr	454.207	10.1581	C20H30N4O8	Peptide(tetra-)	Hydrophobic peptide	Ala-Thr-Thr-Tyr	3.082e-07	2.87376e-06	5352.74	5352.74	H57 up vs H0
methiin	151.03	10.1952	C4H9NO3S	0	0	N-Acetylputrescine	0.0323047	0.0450308	0.248873	-4.01812	H57 down vs H0
N-Acetylputrescine	130.111	10.2028	C6H14N2O	Amino Acid Metabolism	Arginine and proline metabolism	N-Acetylputrescine	0.00157155	0.00303745	0.256737	-3.89503	H57 down vs H0
4-Aminobutanal	87.0684	10.2047	C4H9NO	Amino Acid Metabolism	Arginine and proline metabolism__beta-A	N-Acetylputrescine	0.000856857	0.00176487	0.28002	-3.57118	H57 down vs H0
(S)-AMPA	186.064	10.2094	C7H10N2O4	0	0		0.000484315	0.00104407	9.9192	9.9192	H57 up vs H0
Leu-Val-Asp	345.19	10.2162	C15H27N3O6	Peptide(tri-)	Hydrophobic peptide	Leu-Val-Asp	1.7586e-07	1.95715e-06	1352.34	1352.34	H57 up vs H0
indigo	131.037	10.2288	C16H10N2O2	0	indigo biosynthesis	indigo	0.00961901	0.0153637	0.396337	-2.52311	H57 down vs H0
Actinidine	147.105	10.3051	C10H13N	0	0	Actinidine	1.49163e-08	3.54906e-07	0.00157492	-634.952	H57 down vs H0
2-Oxoglutaramate	145.038	10.3182	C5H7NO4	Amino Acid Metabolism	Glutamate metabolism	2-Oxoglutaramate	8.37303e-05	0.000221356	7.80458	7.80458	H57 up vs H0
Glycerol	92.0474	10.3432	C3H8O3	Carbohydrate Metabolism	Galactose metabolism__Glycerolipid meta	Glycerol	0.00117652	0.00237368	2.82159	2.82159	H57 up vs H0
Deoxycytidine	227.091	10.3573	C9H13N3O4	Nucleotide Metabolism	Pyrimidine metabolism	Deoxycytidine	3.92446e-11	5.6816e-09	0.00086564	-1155.21	H57 down vs H0
D-Glutamate	147.053	10.3619	C5H9NO4	Amino Acid Metabolism	Glutamate metabolism__D-Glutamine and D	D-Glutamate	4.44561e-05	0.000125203	5.07155	5.07155	H57 up vs H0
5-Hydroxytryptophol	177.079	10.3741	C10H11NO2	0	0	5-Hydroxytryptophol	0.000135965	0.000333865	0.169744	-5.89123	H57 down vs H0
Ser-Tyr	268.106	10.3916	C12H16N2O5	Peptide(di-)	Hydrophobic peptide	Ser-Tyr	1.89094e-05	5.95777e-05	44.1221	44.1221	H57 up vs H0
Ala-Leu-Asp-Tyr	480.222	10.3942	C22H32N4O8	Peptide(tetra-)	Hydrophobic peptide	Leu-Lys-Val	4.03142e-08	7.12011e-07	771.788	771.788	H57 up vs H0
Gln-Pro-Ser	330.154	10.4537	C13H22N4O6	Peptide(tri-)	Polar peptide	D-Glutamate	4.04243e-06	1.76536e-05	106.854	106.854	H57 up vs H0
Lotaustralin	261.121	10.4776	C11H19NO6	0	lotaustralin biosynthesis __ superpathw	Lotaustralin	0.00207616	0.00394642	0.0660952	-15.1297	H57 down vs H0
Ala-His	226.107	10.5166	C9H14N4O3	Peptide(di-)	Basic peptide	Carnosine	9.30541e-08	1.21146e-06	1886.66	1886.66	H57 up vs H0
D-Alanyl-D-alanine	160.085	10.5311	C6H12N2O3	Amino Acid Metabolism	D-Alanine metabolism__Peptidoglycan bio	D-Alanyl-D-alanine	0.00156757	0.00303745	51.4828	51.4828	H57 up vs H0
N3-(4-methoxyfumaroyl)-L-2,3-diaminopropanoate	216.075	10.5493	C8H12N2O5	0	0	L-Leucine	4.24928e-05	0.000122167	6.67495	6.67495	H57 up vs H0
L-3-Amino-isobutanoate	103.063	10.5521	C4H9NO2	Amino Acid Metabolism	Valine, leucine and isoleucine degradat	Arg-Thr-Ser-Tyr	2.32417e-06	1.17917e-05	9.34324	9.34324	H57 up vs H0
8-Hydroxy-7-methylguanine	181.06	10.5559	C6H7N5O2	0	0	8-Hydroxy-7-methylguanine	8.30967e-05	0.000220526	0.0231395	-43.2162	H57 down vs H0
D-Glutamine	146.069	10.5732	C5H10N2O3	Amino Acid Metabolism	D-Glutamine and D-glutamate metabolism	Arg-Thr-Ser-Tyr	0.00527083	0.00889211	11.8966	11.8966	H57 up vs H0
L-Leucine	131.095	10.5986	C6H13NO2	Amino Acid Metabolism	Valine, leucine and isoleucine degradat	L-Leucine	3.747e-05	0.00010909	7.50418	7.50418	H57 up vs H0
Stachydrine	143.094	10.6268	C7H13NO2	0	stachydrine degradation	3-Butynoate	5.66488e-06	2.2594e-05	0.111215	-8.99159	H57 down vs H0
meso-2,6-Diaminoheptanedioate	190.095	10.6373	C7H14N2O4	Amino Acid Metabolism	Lysine biosynthesis	meso-2,6-Diaminoheptanedioate	0.0328681	0.0457238	4.84705	4.84705	H57 up vs H0
allopurinol	136.038	10.6392	C5H4N4O	0	0	allopurinol	1.00314e-05	3.56181e-05	9.57528	9.57528	H57 up vs H0
[FA dioxo(8:0)] 4,7-dioxo-octanoic acid	172.074	10.6448	C8H12O4	Lipids: Fatty Acyls	Fatty Acids and Conjugates	[FA dioxo(8:0)] 4,7-dioxo-octanoic acid	0.000326351	0.000726393	0.394315	-2.53604	H57 down vs H0
Phe-Asp	280.106	10.6489	C13H16N2O5	Peptide(di-)	Hydrophobic peptide	L-Leucine	3.65821e-05	0.000106956	11.0243	11.0243	H57 up vs H0
N-Acetyl-D-fucosamine	205.095	10.6515	C8H15NO5	0	0	(S)-Dihydroorotate	1.10903e-06	6.82695e-06	0.0985377	-10.1484	H57 down vs H0
DL-2-Aminooctanoicacid	159.126	10.6597	C8H17NO2	0	0	(S)-Dihydroorotate	0.000176583	0.0004216	0.0291122	-34.3499	H57 down vs H0
[truncated: 201 more rows]

## Sheet: 81-hour
Putative Metabolites	Mass	RT	FORMULA	Map	Pathway	BP	p-value(H81 vs. H0)	FDR-stepup (p-value(H81 vs. H0))	Ratio(H81 vs. H0)	Fold-Change(H81 vs. H0)	Fold-Change(H81 vs. H0) (Description)
[truncated: 490 more rows]

[truncated: 1 more sheets: 312-hour]
