# Supplementary material for: Mastitomics, the integrated omics of bovine milk in an experimental model of Streptococcus uberis mastitis: 3. Untargeted metabolomics
Source: Royal Society of Chemistry journal article supplement (doi:10.1039/c6mb00289g), 2016-07-14
Supplement: c6mb00289g1.zip [file Table_S7_Pathos_metabolic_pathways_enrichment_312_hrs_vs_0_hrs.pdf › Table_S7_Pathos_metabolic_pathways_enrichment_312_hrs_vs_0_hrs.pdf]

# Pathos

A metabolomics tool from Glasgow Polyomics

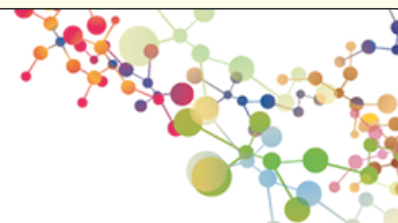
[Upload File](#)
[Analyse](#)
[Feedback](#)
[Instructions](#)

 Organism: 


 Base Condition: 

 Experimental Condition: 

Cut-offs for colour-flagging:







File: 'pathos\_KEGGlist.txt'

Kegg Maps for All Organisms with compounds from input list

 KEY [hide](#)

 All maps ☒
☒ : View metabolites found for a particular map (or all maps) — toggles list on and off.

☒ : Link to a graph of results for a particular metabolite. Change indication scale — [increase  decrease]

**Arginine and proline metabolism:** 17 metabolites out of 67 (10 changed) ☒

- ☒ (S)-1-Pyrroline-5-carboxylate C5H7NO2
- ☒ 1-Pyrroline-4-hydroxy-2-carboxylate C5H7NO3
- ☒ 2,5-Dioxopentanoate C5H6O4
- ☒ 4-Aminobutyraldehyde C4H9NO
- ☒ Creatine C4H9N3O2
- ☒ Creatinine C4H7N3O
- ☒ D-Proline C5H9NO2
- ☒ L-1-Pyrroline-3-hydroxy-5-carboxylate C5H7NO3
- ☒ L-Arginine C6H14N4O2
- ☒ L-Glutamate C5H9NO4
- ☒ L-Glutamate 5-semialdehyde C5H9NO3
- ☒ L-Ornithine C5H12N2O2
- ☒ L-Proline C5H9NO2
- ☒ N-Acetylputrescine C6H14N2O
- ☒ N-Carbamoylsarcosine C4H8N2O3
- ☒ N2-Succinyl-L-ornithine C9H16N2O5
- ☒ Phosphocreatine C4H10N3O5P

 Generate map of **Arginine and proline metabolism** highlighting potential metabolites.

**Aminoacyl-tRNA biosynthesis:** 12 metabolites out of 24 (9 changed) ☒

- ☒ L-Alanine C3H7NO2
- ☒ L-Arginine C6H14N4O2
- ☒ L-Asparagine C4H8N2O3
- ☒ L-Glutamate C5H9NO4
- ☒ L-Glutamine C5H10N2O3
- ☒ L-Histidine C6H9N3O2
- ☒ L-Leucine C6H13NO2
- ☒ L-Lysine C6H14N2O2
- ☒ L-Methionine C5H11NO2S
- ☒ L-Phenylalanine C9H11NO2
- ☒ L-Proline C5H9NO2
- ☒ L-Tryptophan C11H12N2O2

 Generate map of **Aminoacyl-tRNA biosynthesis** highlighting potential metabolites.

**Pyrimidine metabolism:** 17 metabolites out of 55 (8 changed) ☒

- ☒ (S)-Dihydroorotate C5H6N2O4
- ☒ 3-Oxopropanoate C3H4O3

G 5-Methylcytosine C5H7N3O  
G Carbamoyl phosphate CH4NO5P  
G Cytidine C9H13N3O5  
G Cytosine C4H5N3O  
G Deoxycytidine C9H13N3O4  
G Deoxyuridine C9H12N2O5  
G FucoseMalonate C3H4O4  
G L-Glutamine C5H10N2O3  
G Orotate C5H4N2O4  
G Pseudouridine C9H12N2O6  
G Thymidine C10H14N2O5  
G Thymine C5H6N2O2  
G TrypsinUridine C9H12N2O6  
G beta-Alanine C3H7NO2  
G dTTP C10H17N2O14P3

Generate map of **Pyrimidine metabolism** highlighting potential metabolites.

**Glucosinolate biosynthesis:** 6 metabolites out of 72 (6 changed) v

G (S)-3-Methyl-2-oxopentanoic acid C6H10O3  
G 3-Methyl-2-oxobutanoic acid C5H8O3  
G L-Leucine C6H13NO2  
G L-Methionine C5H11NO2S  
G L-Phenylalanine C9H11NO2  
G L-Tryptophan C11H12N2O2

Generate map of **Glucosinolate biosynthesis** highlighting potential metabolites.

**Primary bile acid biosynthesis:** 7 metabolites out of 47 (6 changed) v

G 3alpha,7alpha,12alpha,26-Tetrahydroxy-5beta-cholestane  
 C27H48O4  
G 3alpha,7alpha,12alpha-Trihydroxy-5beta-cholanate  
 C24H40O5  
G Chenodeoxycholate C24H40O4  
G Glycocholate C26H43NO6  
G Taurine C2H7NO3S  
G Taurochenodeoxycholate C26H45NO6S  
G Taurocholate C26H45NO7S

Generate map of **Primary bile acid biosynthesis** highlighting potential metabolites.

**Alanine, aspartate and glutamate metabolism:** 11 metabolites out of 25 (5 changed) v

G (S)-1-Pyrroline-5-carboxylate C5H7NO2  
G 2-Oxoglutaramate C5H7NO4  
G Carbamoyl phosphate CH4NO5P  
G D-Aspartate C4H7NO4  
G D-Glucosamine 6-phosphate C6H14NO8P  
G L-Alanine C3H7NO2  
G L-Asparagine C4H8N2O3  
G L-Glutamate C5H9NO4  
G L-Glutamine C5H10N2O3  
G N-Acetyl-L-aspartate C6H9NO5  
G Succinate C4H6O4

Generate map of **Alanine, aspartate and glutamate metabolism** highlighting potential metabolites.

**C5-Branched dibasic acid metabolism:** 7 metabolites out of 32 (5 changed) v

G 2-Methylmaleate C5H6O4  
G 2-Oxobutanoate C4H6O3  
G 4-Hydroxy-4-methylglutamate C6H11NO5  
G L-Glutamate C5H9NO4  
G Methylxaloacetate C5H6O5  
G Propanoyl phosphate C3H7O5P  
G cis-Aconitate C6H6O6

Generate map of **C5-Branched dibasic acid metabolism** highlighting potential metabolites.

**Histidine metabolism:** 9 metabolites out of 44 (5 changed) v

G 1H-Imidazole-4-ethanamine C5H9N3

- G Carnosine C9H14N4O3
- G Imidazol-5-yl-pyruvate C6H6N2O3
- G L-Glutamate C5H9NO4
- G L-Histidine C6H9N3O2
- G Methylimidazoleacetic acid C6H8N2O2
- G N(pi)-Methyl-L-histidine C7H11N3O2
- G N-Formimino-L-glutamate C6H10N2O4
- G Urocanate C6H6N2O2

Generate map of **Histidine metabolism** highlighting potential metabolites.

**Purine metabolism:** 11 metabolites out of 90 (5 changed) v

- G 3',5'-Cyclic AMP C10H12N5O6P
- G Adenine C5H5N5
- G Carbamoyl phosphate CH4NO5P
- G Guanine C5H5N5O
- G Guanosine C10H13N5O5
- G Hypoxanthine C5H4N4O
- G Inosine C10H12N4O5
- G L-Glutamine C5H10N2O3
- G Sulfate H2SO4
- G Urate C5H4N4O3
- G Urate-3-ribonucleoside C10H12N4O7

Generate map of **Purine metabolism** highlighting potential metabolites.

**Secondary bile acid biosynthesis:** 5 metabolites out of 11 (5 changed) v

- G 3alpha,7alpha,12alpha-Trihydroxy-5beta-cholanate C24H40O5
- G Chenodeoxycholate C24H40O4
- G Glycocholate C26H43NO6
- G Taurochenodeoxycholate C26H45NO6S
- G Taurocholate C26H45NO7S

Generate map of **Secondary bile acid biosynthesis** highlighting potential metabolites.

**Butanoate metabolism:** 7 metabolites out of 38 (4 changed) v

- G (R)-3-Hydroxybutanoate C4H8O3
- G 3-Butyn-1-ol C4H6O
- G 3-Butynoate C4H4O2
- G 4-Hydroxybutanoic acid C4H8O3
- G Butanal C4H8O
- G L-Glutamate C5H9NO4
- G Succinate C4H6O4

Generate map of **Butanoate metabolism** highlighting potential metabolites.

**Lysine biosynthesis:** 7 metabolites out of 26 (4 changed) v

- G (R)-2-Hydroxybutane-1,2,4-tricarboxylate C7H10O7
- G 2,3,4,5-Tetrahydrodipicolinate C7H9NO4
- G 2-Oxadipate C6H8O5
- G L-2-Aminoadipate C6H11NO4
- G L-Homoserine C4H9NO3
- G L-Lysine C6H14N2O2
- G meso-2,6-Diaminoheptanedioate C7H14N2O4

Generate map of **Lysine biosynthesis** highlighting potential metabolites.

**Lysine degradation:** 11 metabolites out of 42 (4 changed) v

- G (S)-5-Amino-3-oxohexanoic acid C6H11NO3
- G 2-Oxadipate C6H8O5
- G 5-Aminopentanamide C5H12N2O
- G 5-Oxopentanoate C5H8O3
- G Carnitine C7H16NO3
- G L-2-Aminoadipate C6H11NO4
- G L-Lysine C6H14N2O2
- G N2-(D-1-Carboxyethyl)-L-lysine C9H18N2O4
- G N6-Acetyl-N6-hydroxy-L-lysine C8H16N2O4
- G N6-Hydroxy-L-lysine C6H14N2O3

 Piperidine C5H9N

Generate map of **Lysine degradation** highlighting potential metabolites.

**Phenylalanine metabolism:** 10 metabolites out of 64 (4 changed) 

 2-Hydroxy-2,4-pentadienoate C5H6O3

 2-Phenylacetamide C8H9NO

 3-(3-Hydroxy-phenyl)-propanoic acid C9H10O3

 4-Hydroxybenzoate C7H6O3

 Hippurate C9H9NO3

 L-Phenylalanine C9H11NO2

 Phenylacetylglutamine C10H11NO3

 Phenylpropanoate C9H10O2

 Succinate C4H6O4

 enol-Phenylpyruvate C9H8O3

Generate map of **Phenylalanine metabolism** highlighting potential metabolites.

**Phenylalanine, tyrosine and tryptophan biosynthesis:** 4 metabolites out of 31 (4 changed) 

 3-(4-Hydroxyphenyl)pyruvate C9H8O4

 Indole C8H7N

 L-Phenylalanine C9H11NO2

 L-Tryptophan C11H12N2O2

Generate map of **Phenylalanine, tyrosine and tryptophan biosynthesis** highlighting potential metabolites.

**Tropane, piperidine and pyridine alkaloid biosynthesis:** 7 metabolites out of 61 (4 changed) 

 1-Methylpyrrolinium C5H10N

 L-Lysine C6H14N2O2

 L-Phenylalanine C9H11NO2

 Nicotinate C6H5NO2

 Nicotine C10H14N2

 Piperidine C5H9N

 Retronecine C8H13NO2

Generate map of **Tropane, piperidine and pyridine alkaloid biosynthesis** highlighting potential metabolites.

**Tryptophan metabolism:** 11 metabolites out of 80 (4 changed) 

 2-Aminomuconate semialdehyde C6H7NO3

 2-Aminophenol C6H7NO

 2-Oxoadipate C6H8O5

 3-Hydroxyanthranilate C7H7NO3

 3-Indoleacetonitrile C10H8N2

 4,6-Dihydroxyquinoline C9H7NO2

 5-Hydroxy-L-tryptophan C11H12N2O3

 5-Methoxyindoleacetate C11H11NO3

 Indole C8H7N

 Indolelactate C11H11NO3

 L-Tryptophan C11H12N2O2

Generate map of **Tryptophan metabolism** highlighting potential metabolites.

**Tyrosine metabolism:** 14 metabolites out of 75 (4 changed) 

 2-Carboxy-2,3-dihydro-5,6-dihydroxyindole C9H9NO4

 2-Hydroxy-3-(4-hydroxyphenyl)propenoate C9H8O4

 3-(4-Hydroxyphenyl)lactate C9H10O4

 3-(4-Hydroxyphenyl)pyruvate C9H8O4

 3-Amino-3-(4-hydroxyphenyl)propanoate C9H11NO3

 4-Hydroxyphenylacetaldehyde C8H8O2

 4-Hydroxyphenylethanol C8H10O2

 5,6-Dihydroxyindole C8H7NO2

 Dopaquinone C9H9NO4

 Indole-5,6-quinone C8H5NO2

 L-Adrenaline C9H13NO3

 Succinate C4H6O4

 p-Benzenediol C6H6O2

 p-Hydroxyphenylacetylglutamine C10H11NO4

Generate map of **Tyrosine metabolism** highlighting potential metabolites.

**Valine, leucine and isoleucine biosynthesis:** 6 metabolites out of 23 (4 changed) 

- G (2S)-2-Isopropylmalate C7H12O5
- G (S)-3-Methyl-2-oxopentanoic acid C6H10O3
- G 2-Methylmaleate C5H6O4
- G 2-Oxobutanoate C4H6O3
- G 3-Methyl-2-oxobutanoic acid C5H8O3
- G L-Leucine C6H13NO2

Generate map of **Valine, leucine and isoleucine biosynthesis** highlighting potential metabolites.

**Ascorbate and aldarate metabolism:** 7 metabolites out of 45 (3 changed) v

- G 2,5-Dioxopentanoate C5H6O4
- G D-Glucuronate C6H10O7
- G L-Arabinonate C5H10O6
- G L-Arabinose C5H10O5
- G Monodehydroascorbate C6H7O6
- G Threonate C4H8O5
- G myo-Inositol C6H12O6

Generate map of **Ascorbate and aldarate metabolism** highlighting potential metabolites.

**Biosynthesis of unsaturated fatty acids:** 12 metabolites out of 49 (3 changed) v

- G (13Z)-Docosenoic acid C22H42O2
- G (15Z)-Tetracosenoic acid C24H46O2
- G (5Z,8Z,11Z,14Z)-Icosatetraenoic acid C20H32O2
- G (9Z)-Octadecenoic acid C18H34O2
- G Docosanoic acid C22H44O2
- G Hexadecanoic acid C16H32O2
- G Icosadienoic acid C20H36O2
- G Icosanoic acid C20H40O2
- G Icosenoic acid C20H38O2
- G Linoleate C18H32O2
- G Octadecanoic acid C18H36O2
- G Tetracosanoic acid C24H48O2

Generate map of **Biosynthesis of unsaturated fatty acids** highlighting potential metabolites.

**Caffeine metabolism:** 3 metabolites out of 21 (3 changed) v

- G 1-Methyluric acid C6H6N4O3
- G 5-Acetylamino-6-amino-3-methyluracil C7H10N4O3
- G 7-Methylxanthine C6H6N4O2

Generate map of **Caffeine metabolism** highlighting potential metabolites.

**Cyanoamino acid metabolism:** 6 metabolites out of 24 (3 changed) v

- G (Z)-4-Hydroxyphenylacetaldehyde-oxime C8H9NO2
- G (Z)-Phenylacetaldehyde oxime C8H9NO
- G L-Asparagine C4H8N2O3
- G L-Phenylalanine C9H11NO2
- G Phenylacetoneitrile C8H7N
- G beta-Aminopropionitrile C3H6N2

Generate map of **Cyanoamino acid metabolism** highlighting potential metabolites.

**Galactose metabolism:** 5 metabolites out of 41 (3 changed) v

- G 3-beta-D-Galactosyl-sn-glycerol C9H18O8
- G D-Sorbitol C6H14O6
- G Glycerol C3H8O3
- G Lactose C12H22O11
- G myo-Inositol C6H12O6

Generate map of **Galactose metabolism** highlighting potential metabolites.

**Glycine, serine and threonine metabolism:** 12 metabolites out of 45 (3 changed) v

- G (R)-1-Aminopropan-2-ol C3H9NO
- G 2-Oxobutanoate C4H6O3
- G Aminoacetone C3H7NO
- G Betaine C5H11NO2
- G Betaine aldehyde C5H12NO
- G Choline C5H14NO
- G Creatine C4H9N3O2
- G D-Glycerate C3H6O4

 L-2-Amino-3-oxobutanoic acid C4H7NO3

 L-Homoserine C4H9NO3

 L-Tryptophan C11H12N2O2

 N,N-Dimethylglycine C4H9NO2

Generate map of **Glycine, serine and threonine metabolism** highlighting potential metabolites.

**Glyoxylate and dicarboxylate metabolism:** 9 metabolites out of 55 (3 changed) 

 (S)-Malate C4H6O5

 2-Hydroxy-3-oxoadipate C6H8O6

 4-Hydroxy-2-oxoglutarate C5H6O6

 D-Glycerate C3H6O4

 Isocitrate C6H8O7

 L-Glutamate C5H9NO4

 L-Glutamine C5H10N2O3

 Succinate C4H6O4

 cis-Aconitate C6H6O6

Generate map of **Glyoxylate and dicarboxylate metabolism** highlighting potential metabolites.

**Peptidoglycan biosynthesis:** 3 metabolites out of 26 (3 changed) 

 D-Alanine C3H7NO2

 D-Alanyl-D-alanine C6H12N2O3

 Orthophosphate H3PO4

Generate map of **Peptidoglycan biosynthesis** highlighting potential metabolites.

**Reductive carboxylate cycle (CO2 fixation):** 6 metabolites out of 40 (3 changed) 

 (S)-Malate C4H6O5

 3-Oxopropanoate C3H4O3

 4-Hydroxybutanoic acid C4H8O3

 Isocitrate C6H8O7

 Succinate C4H6O4

 cis-Aconitate C6H6O6

Generate map of **Reductive carboxylate cycle (CO2 fixation)** highlighting potential metabolites.

**Taurine and hypotaurine metabolism:** 5 metabolites out of 22 (3 changed) 

 2-Hydroxyethanesulfonate C2H6O4S

 L-Alanine C3H7NO2

 L-Glutamate C5H9NO4

 Taurine C2H7NO3S

 Taurocholate C26H45NO7S

Generate map of **Taurine and hypotaurine metabolism** highlighting potential metabolites.

**Valine, leucine and isoleucine degradation:** 4 metabolites out of 32 (3 changed) 

 (S)-3-Methyl-2-oxopentanoic acid C6H10O3

 3-Methyl-2-oxobutanoic acid C5H8O3

 L-3-Amino-isobutanoate C4H9NO2

 L-Leucine C6H13NO2

Generate map of **Valine, leucine and isoleucine degradation** highlighting potential metabolites.

**beta-Alanine metabolism:** 10 metabolites out of 32 (3 changed) 

 3-Aminopropanal C3H7NO

 3-Oxopropanoate C3H4O3

 4-Aminobutyraldehyde C4H9NO

 Carnosine C9H14N4O3

 FucoseMalonate C3H4O4

 L-Histidine C6H9N3O2

 Pantothenate C9H17NO5

 Propynoate C3H2O2

 beta-Alanine C3H7NO2

 beta-Aminopropionitrile C3H6N2

Generate map of **beta-Alanine metabolism** highlighting potential metabolites.

**Biotin metabolism:** 3 metabolites out of 11 (2 changed) 

 6-Carboxyhexanoate C7H12O4

 Dethiobiotin C10H18N2O3

 L-Lysine C6H14N2O2

Generate map of **Biotin metabolism** highlighting potential metabolites.

**Citrate cycle (TCA cycle):** 4 metabolites out of 16 (2 changed) 

 (S)-Malate C4H6O5

 Isocitrate C6H8O7

 Succinate C4H6O4

 cis-Aconitate C6H6O6

Generate map of **Citrate cycle (TCA cycle)** highlighting potential metabolites.

**D-Alanine metabolism:** 3 metabolites out of 4 (2 changed) 

 D-Alanine C3H7NO2

 D-Alanyl-D-alanine C6H12N2O3

 L-Alanine C3H7NO2

Generate map of **D-Alanine metabolism** highlighting potential metabolites.

**Fatty acid biosynthesis:** 8 metabolites out of 11 (2 changed) 

 (9Z)-Hexadecenoic acid C16H30O2

 (9Z)-Octadecenoic acid C18H34O2

 Decanoic acid C10H20O2

 Dodecanoic acid C12H24O2

 Hexadecanoic acid C16H32O2

 Octadecanoic acid C18H36O2

 Octanoic acid C8H16O2

 Tetradecanoic acid C14H28O2

Generate map of **Fatty acid biosynthesis** highlighting potential metabolites.

**Glycerolipid metabolism:** 4 metabolites out of 12 (2 changed) 

 3-beta-D-Galactosyl-sn-glycerol C9H18O8

 D-Glycerate C3H6O4

 Glycerol C3H8O3

 sn-Glycerol 3-phosphate C3H9O6P

Generate map of **Glycerolipid metabolism** highlighting potential metabolites.

**Linoleic acid metabolism:** 6 metabolites out of 25 (2 changed) 

 (5Z,8Z,11Z,14Z)-Icosatetraenoic acid C20H32O2

 9(S)-HODE C18H32O3

 9(S)-HPODE C18H32O4

 9,10-DHOME C18H34O4

 9,12,13-TriHOME C18H34O5

 Linoleate C18H32O2

Generate map of **Linoleic acid metabolism** highlighting potential metabolites.

**Methane metabolism:** 4 metabolites out of 60 (2 changed) 

 (S)-Malate C4H6O5

 2-Oxoadipate C6H8O5

 3-(4-Hydroxyphenyl)pyruvate C9H8O4

 D-Glycerate C3H6O4

Generate map of **Methane metabolism** highlighting potential metabolites.

**Nicotinate and nicotinamide metabolism:** 5 metabolites out of 46 (2 changed) 

 1-Methylpyrrolinium C5H10N

 2,3-Dimethylmaleate C6H8O4

 Maleamate C4H5NO3

 Nicotinamide C6H6N2O

 Nicotinate C6H5NO2

Generate map of **Nicotinate and nicotinamide metabolism** highlighting potential metabolites.

**Novobiocin biosynthesis:** 2 metabolites out of 23 (2 changed) 

 3-(4-Hydroxyphenyl)pyruvate C9H8O4

 L-Proline C5H9NO2

Generate map of **Novobiocin biosynthesis** highlighting potential metabolites.

**Pentose and glucuronate interconversions:** 6 metabolites out of 50 (2 changed) 

 2,5-Dioxopentanoate C5H6O4

 D-Glucuronate C6H10O7

 D-Xylulose C5H10O5

 Glycerol C3H8O3

 L-Arabinose C5H10O5

 Xylitol C5H12O5

Generate map of **Pentose and glucuronate interconversions** highlighting potential metabolites.

**Porphyrin and chlorophyll metabolism:** 4 metabolites out of 93 (2 changed) 

 (R)-1-Aminopropan-2-ol C3H9NO

 L-Glutamate C5H9NO4

 Porphobilinogen C10H14N2O4

 Precorrin 3B C43H50N4O17

Generate map of **Porphyrin and chlorophyll metabolism** highlighting potential metabolites.

**Propanoate metabolism:** 8 metabolites out of 41 (2 changed) 

 (S)-Methylmalonate semialdehyde C4H6O3

 2-Methylcitrate C7H10O7

 2-Oxobutanoate C4H6O3

 3-Oxopropanoate C3H4O3

 Propanoyl phosphate C3H7O5P

 Propynoate C3H2O2

 Succinate C4H6O4

 beta-Alanine C3H7NO2

Generate map of **Propanoate metabolism** highlighting potential metabolites.

**Pyruvate metabolism:** 5 metabolites out of 28 (2 changed) 

 (2S)-2-Isopropylmalate C7H12O5

 (R)-2-Hydroxybutane-1,2,4-tricarboxylate C7H10O7

 (R)-Lactate C3H6O3

 (S)-Malate C4H6O5

 Succinate C4H6O4

Generate map of **Pyruvate metabolism** highlighting potential metabolites.

**Styrene degradation:** 4 metabolites out of 23 (2 changed) 

 (Z)-Phenylacetaldehyde oxime C8H9NO

 2-Hydroxy-2,4-pentadienoate C5H6O3

 2-Phenylacetamide C8H9NO

 Phenylacetonitrile C8H7N

Generate map of **Styrene degradation** highlighting potential metabolites.

**Amino sugar and nucleotide sugar metabolism:** 7 metabolites out of 77 (1 changed) 

 D-Glucosamine C6H13NO5

 D-Glucosamine 6-phosphate C6H14NO8P

 D-Glucuronate C6H10O7

 L-Arabinose C5H10O5

 N-Acetyl-D-glucosamine 6-phosphate C8H16NO9P

 N-Acetylneuraminate C11H19NO9

 UDP-N-acetyl-D-galactosamine C17H27N3O17P2

Generate map of **Amino sugar and nucleotide sugar metabolism** highlighting potential metabolites.

**Arachidonic acid metabolism:** 2 metabolites out of 74 (1 changed) 

 (5Z,8Z,11Z,14Z)-Icosatetraenoic acid C20H32O2

 2,3-Dinor-8-iso prostaglandin F2alpha C18H30O5

Generate map of **Arachidonic acid metabolism** highlighting potential metabolites.

**Benzoxazinoid biosynthesis:** 1 metabolite out of 9 (1 changed) 

 Indole C8H7N

Generate map of **Benzoxazinoid biosynthesis** highlighting potential metabolites.

**Betalain biosynthesis:** 2 metabolites out of 24 (1 changed) 

 2-Carboxy-2,3-dihydro-5,6-dihydroxyindole C9H9NO4

 Dopaquinone C9H9NO4

Generate map of **Betalain biosynthesis** highlighting potential metabolites.

**Biosynthesis of vancomycin group antibiotics:** 1 metabolite out of 18 (1 changed) 

 3-(4-Hydroxyphenyl)pyruvate C9H8O4

Generate map of **Biosynthesis of vancomycin group antibiotics** highlighting potential metabolites.

**Cysteine and methionine metabolism:** 10 metabolites out of 54 (1 changed) 



G 2-Aminoacrylate C3H5NO2  
G 2-Oxobutanoate C4H6O3  
G L-Alanine C3H7NO2  
G L-Homoserine C4H9NO3  
G L-Methionine C5H11NO2S  
G L-Methionine S-oxide C5H11NO3S  
G Mercaptopyruvate C3H4O3S  
G O-Acetyl-L-homoserine C6H11NO4  
G O-Succinyl-L-homoserine C8H13NO6  
G Sulfate H2SO4

Generate map of **Cysteine and methionine metabolism** highlighting potential metabolites.

**D-Glutamine and D-glutamate metabolism:** 4 metabolites out of 9 (1 changed) v

G D-Glutamate C5H9NO4  
G D-Glutamine C5H10N2O3  
G L-Glutamate C5H9NO4  
G L-Glutamine C5H10N2O3

Generate map of **D-Glutamine and D-glutamate metabolism** highlighting potential metabolites.

**Diterpenoid biosynthesis:** 1 metabolite out of 69 (1 changed) v

G Taxa-4(20),11(12)-dien-5alpha-yl acetate C22H34O2

Generate map of **Diterpenoid biosynthesis** highlighting potential metabolites.

**Glutathione metabolism:** 2 metabolites out of 29 (1 changed) v

G L-Glutamate C5H9NO4  
G L-Ornithine C5H12N2O2

Generate map of **Glutathione metabolism** highlighting potential metabolites.

**Indole alkaloid biosynthesis:** 1 metabolite out of 47 (1 changed) v

G L-Tryptophan C11H12N2O2

Generate map of **Indole alkaloid biosynthesis** highlighting potential metabolites.

**Inositol phosphate metabolism:** 4 metabolites out of 30 (1 changed) v

G 3-Oxopropanoate C3H4O3  
G D-Glucose 6-phosphate C6H13O9P  
G D-Glucuronate C6H10O7  
G myo-Inositol C6H12O6

Generate map of **Inositol phosphate metabolism** highlighting potential metabolites.

**Isoquinoline alkaloid biosynthesis:** 2 metabolites out of 93 (1 changed) v

G 3-(4-Hydroxyphenyl)pyruvate C9H8O4  
G 4-Hydroxyphenylacetaldehyde C8H8O2

Generate map of **Isoquinoline alkaloid biosynthesis** highlighting potential metabolites.

**Nitrogen metabolism:** 3 metabolites out of 16 (1 changed) v

G Carbamoyl phosphate CH4NO5P  
G L-Glutamate C5H9NO4  
G L-Glutamine C5H10N2O3

Generate map of **Nitrogen metabolism** highlighting potential metabolites.

**Oxidative phosphorylation:** 2 metabolites out of 13 (1 changed) v

G Orthophosphate H3PO4  
G Succinate C4H6O4

Generate map of **Oxidative phosphorylation** highlighting potential metabolites.

**Pantothenate and CoA biosynthesis:** 4 metabolites out of 25 (1 changed) v

G 2-Acetylactate C5H8O4  
G 3-Methyl-2-oxobutanoic acid C5H8O3  
G Pantothenate C9H17NO5  
G beta-Alanine C3H7NO2

Generate map of **Pantothenate and CoA biosynthesis** highlighting potential metabolites.

**Pentose phosphate pathway:** 5 metabolites out of 34 (1 changed) v

G 2-Deoxy-D-ribose 5-phosphate C5H11O7P  
G D-Gluconic acid C6H12O7  
G D-Glucono-1,5-lactone C6H10O6  
G D-Glycerate C3H6O4

 [beta-D-Glucose](#) C6H12O6

Generate map of **Pentose phosphate pathway** highlighting potential metabolites.

**Phenylpropanoid biosynthesis:** 2 metabolites out of 51 (1 changed) 

 [L-Phenylalanine](#) C9H11NO2

 [Sinapyl alcohol](#) C11H14O4

Generate map of **Phenylpropanoid biosynthesis** highlighting potential metabolites.

**Phosphatidylinositol signaling system:** 1 metabolite out of 16 (1 changed) 

 [myo-Inositol](#) C6H12O6

Generate map of **Phosphatidylinositol signaling system** highlighting potential metabolites.

**Photosynthesis:** 1 metabolite out of 10 (1 changed) 

 [Orthophosphate](#) H3PO4

Generate map of **Photosynthesis** highlighting potential metabolites.

**Puromycin biosynthesis:** 1 metabolite out of 12 (1 changed) 

 [Puromycin](#) C22H29N7O5

Generate map of **Puromycin biosynthesis** highlighting potential metabolites.

**Riboflavin metabolism:** 3 metabolites out of 19 (1 changed) 

 [Lumichrome](#) C12H10N4O2

 [Riboflavin](#) C17H20N4O6

 [p-Benzenediol](#) C6H6O2

Generate map of **Riboflavin metabolism** highlighting potential metabolites.

**Starch and sucrose metabolism:** 4 metabolites out of 37 (1 changed) 

 [D-Glucose 6-phosphate](#) C6H13O9P

 [D-Glucuronate](#) C6H10O7

 [alpha,alpha'-Trehalose 6-phosphate](#) C12H23O14P

 [beta-D-Glucose](#) C6H12O6

Generate map of **Starch and sucrose metabolism** highlighting potential metabolites.

**Streptomycin biosynthesis:** 2 metabolites out of 23 (1 changed) 

 [D-Glucose 6-phosphate](#) C6H13O9P

 [myo-Inositol](#) C6H12O6

Generate map of **Streptomycin biosynthesis** highlighting potential metabolites.

**Sulfur metabolism:** 5 metabolites out of 21 (1 changed) 

 [L-Homoserine](#) C4H9NO3

 [O-Succinyl-L-homoserine](#) C8H13NO6

 [Succinate](#) C4H6O4

 [Sulfate](#) H2SO4

 [Taurine](#) C2H7NO3S

Generate map of **Sulfur metabolism** highlighting potential metabolites.

**Synthesis and degradation of ketone bodies:** 1 metabolite out of 6 (1 changed) 

 [\(R\)-3-Hydroxybutanoate](#) C4H8O3

Generate map of **Synthesis and degradation of ketone bodies** highlighting potential metabolites.

**Trinitrotoluene degradation:** 1 metabolite out of 20 (1 changed) 

 [\(S\)-Methylmalonate semialdehyde](#) C4H6O3

Generate map of **Trinitrotoluene degradation** highlighting potential metabolites.

**Ubiquinone and other terpenoid-quinone biosynthesis:** 3 metabolites out of 36 (1 changed) 

 [3-\(4-Hydroxyphenyl\)lactate](#) C9H10O4

 [3-\(4-Hydroxyphenyl\)pyruvate](#) C9H8O4

 [4-Hydroxybenzoate](#) C7H6O3

Generate map of **Ubiquinone and other terpenoid-quinone biosynthesis** highlighting potential metabolites.

**Zeatin biosynthesis:** 2 metabolites out of 36 (1 changed) 

 [3-Methylbut-2-enal](#) C5H8O

 [Adenine](#) C5H5N5

Generate map of **Zeatin biosynthesis** highlighting potential metabolites.

**1,4-Dichlorobenzene degradation:** 6 metabolites out of 74 

 [2-Aminomuconate semialdehyde](#) C6H7NO3

 [2-Aminophenol](#) C6H7NO

 [3-Hydroxyanthranilate](#) C7H7NO3

-  4-Hydroxyaniline C6H7NO
-  4-Hydroxybenzoate C7H6O3
-  p-Benzenediol C6H6O2

Generate map of **1,4-Dichlorobenzene degradation** highlighting potential metabolites.

**Glycerophospholipid metabolism:** 6 metabolites out of 18 

-  Choline C5H14NO
-  Choline phosphate C5H15NO4P
-  Ethanolamine phosphate C2H8NO4P
-  sn-Glycerol 3-phosphate C3H9O6P
-  sn-glycero-3-Phosphocholine C8H21NO6P
-  sn-glycero-3-Phosphoethanolamine C5H14NO6P

Generate map of **Glycerophospholipid metabolism** highlighting potential metabolites.

**Benzoate degradation via hydroxylation:** 3 metabolites out of 66 

-  2-Hydroxy-2,4-pentadienoate C5H6O3
-  4-Hydroxybenzoate C7H6O3
-  p-Benzenediol C6H6O2

Generate map of **Benzoate degradation via hydroxylation** highlighting potential metabolites.

**Fructose and mannose metabolism:** 3 metabolites out of 41 

-  2(alpha-D-Mannosyl)-D-glycerate C9H16O9
-  2-Dehydro-3-deoxy-L-rhamnonate C6H10O5
-  D-Sorbitol C6H14O6

Generate map of **Fructose and mannose metabolism** highlighting potential metabolites.

**Benzoate degradation via CoA ligation:** 2 metabolites out of 57 

-  4-Hydroxybenzoate C7H6O3
-  Succinate C4H6O4

Generate map of **Benzoate degradation via CoA ligation** highlighting potential metabolites.

**Bisphenol A degradation:** 2 metabolites out of 21 

-  4-Hydroxybenzoate C7H6O3
-  p-Benzenediol C6H6O2

Generate map of **Bisphenol A degradation** highlighting potential metabolites.

**Carbazole degradation:** 2 metabolites out of 18 

-  2-Hydroxy-2,4-pentadienoate C5H6O3
-  3-Hydroxyanthranilate C7H7NO3

Generate map of **Carbazole degradation** highlighting potential metabolites.

**Carbon fixation in photosynthetic organisms:** 2 metabolites out of 22 

-  (S)-Malate C4H6O5
-  L-Alanine C3H7NO2

Generate map of **Carbon fixation in photosynthetic organisms** highlighting potential metabolites.

**Clavulanic acid biosynthesis:** 2 metabolites out of 10 

-  Dihydroclavaminic acid C8H12N2O4
-  L-Arginine C6H14N4O2

Generate map of **Clavulanic acid biosynthesis** highlighting potential metabolites.

**D-Arginine and D-ornithine metabolism:** 2 metabolites out of 9 

-  L-Arginine C6H14N4O2
-  L-Ornithine C5H12N2O2

Generate map of **D-Arginine and D-ornithine metabolism** highlighting potential metabolites.

**Ether lipid metabolism:** 2 metabolites out of 2 

-  sn-glycero-3-Phosphocholine C8H21NO6P
-  sn-glycero-3-Phosphoethanolamine C5H14NO6P

Generate map of **Ether lipid metabolism** highlighting potential metabolites.

**Fluorene degradation:** 2 metabolites out of 36 

-  2-Hydroxy-2,4-pentadienoate C5H6O3
-  Phthalate C8H6O4

Generate map of **Fluorene degradation** highlighting potential metabolites.

**Limonene and pinene degradation:** 2 metabolites out of 59 

-  (-)-Limonene C10H16

**G** (1S,4R)-1-Hydroxy-2-oxolimonene C10H16O2

Generate map of **Limonene and pinene degradation** highlighting potential metabolites.

**Terpenoid backbone biosynthesis:** 2 metabolites out of 30 **v**

**G** (R)-Mevalonate C6H12O4

**G** 2-C-Methyl-D-erythritol 4-phosphate C5H13O7P

Generate map of **Terpenoid backbone biosynthesis** highlighting potential metabolites.

**Thiamine metabolism:** 2 metabolites out of 22 **v**

**G** Iminoglycine C2H3NO2

**G** Thiamine C12H17N4OS

Generate map of **Thiamine metabolism** highlighting potential metabolites.

**gamma-Hexachlorocyclohexane degradation:** 2 metabolites out of 72 **v**

**G** Succinate C4H6O4

**G** p-Benzenediol C6H6O2

Generate map of **gamma-Hexachlorocyclohexane degradation** highlighting potential metabolites.

**1- and 2-Methylnaphthalene degradation:** 1 metabolite out of 64 **v**

**G** Phthalate C8H6O4

Generate map of **1- and 2-Methylnaphthalene degradation** highlighting potential metabolites.

**2,4-Dichlorobenzoate degradation:** 1 metabolite out of 29 **v**

**G** 4-Hydroxybenzoate C7H6O3

Generate map of **2,4-Dichlorobenzoate degradation** highlighting potential metabolites.

**3-Chloroacrylic acid degradation:** 1 metabolite out of 10 **v**

**G** 3-Oxopropanoate C3H4O3

Generate map of **3-Chloroacrylic acid degradation** highlighting potential metabolites.

**Atrazine degradation:** 1 metabolite out of 21 **v**

**G** Urea-1-carboxylate C2H4N2O3

Generate map of **Atrazine degradation** highlighting potential metabolites.

**Biphenyl degradation:** 1 metabolite out of 29 **v**

**G** 2-Hydroxy-2,4-pentadienoate C5H6O3

Generate map of **Biphenyl degradation** highlighting potential metabolites.

**Ethylbenzene degradation:** 1 metabolite out of 14 **v**

**G** 2-Hydroxy-2,4-pentadienoate C5H6O3

Generate map of **Ethylbenzene degradation** highlighting potential metabolites.

**Fatty acid elongation in mitochondria:** 1 metabolite out of 28 **v**

**G** Hexadecanoic acid C16H32O2

Generate map of **Fatty acid elongation in mitochondria** highlighting potential metabolites.

**Fatty acid metabolism:** 1 metabolite out of 39 **v**

**G** Hexadecanoic acid C16H32O2

Generate map of **Fatty acid metabolism** highlighting potential metabolites.

**Glycolysis / Gluconeogenesis:** 1 metabolite out of 28 **v**

**G** beta-D-Glucose C6H12O6

Generate map of **Glycolysis / Gluconeogenesis** highlighting potential metabolites.

**Metabolism of xenobiotics by cytochrome P450:** 1 metabolite out of 82 **v**

**G** Nicotine C10H14N2

Generate map of **Metabolism of xenobiotics by cytochrome P450** highlighting potential metabolites.

**Monoterpenoid biosynthesis:** 1 metabolite out of 44 **v**

**G** (-)-Limonene C10H16

Generate map of **Monoterpenoid biosynthesis** highlighting potential metabolites.

**Penicillin and cephalosporin biosynthesis:** 1 metabolite out of 16 **v**

**G** L-2-Aminoadipate C6H11NO4

Generate map of **Penicillin and cephalosporin biosynthesis** highlighting potential metabolites.

**Phosphonate and phosphinate metabolism:** 1 metabolite out of 39 **v**

**G** Phosphonoacetaldehyde C2H5O4P

Generate map of **Phosphonate and phosphinate metabolism** highlighting potential metabolites.

**Selenoamino acid metabolism:** 1 metabolite out of 14 **v**

 L-Alanine C<sub>3</sub>H<sub>7</sub>NO<sub>2</sub>

Generate map of **Selenoamino acid metabolism** highlighting potential metabolites.

**Sphingolipid metabolism:** 1 metabolite out of 11 

 Ethanolamine phosphate C<sub>2</sub>H<sub>8</sub>NO<sub>4</sub>P

Generate map of **Sphingolipid metabolism** highlighting potential metabolites.

**Stilbenoid, diarylheptanoid and gingerol biosynthesis:** 1 metabolite out of 24 

 [6]-Gingerol C<sub>17</sub>H<sub>26</sub>O<sub>4</sub>

Generate map of **Stilbenoid, diarylheptanoid and gingerol biosynthesis** highlighting potential metabolites.

**Tetrachloroethene degradation:** 1 metabolite out of 36 

 3-Oxopropanoate C<sub>3</sub>H<sub>4</sub>O<sub>3</sub>

Generate map of **Tetrachloroethene degradation** highlighting potential metabolites.

**Toluene and xylene degradation:** 1 metabolite out of 38 

 2-Hydroxy-2,4-pentadienoate C<sub>5</sub>H<sub>6</sub>O<sub>3</sub>

Generate map of **Toluene and xylene degradation** highlighting potential metabolites.

**Vitamin B6 metabolism:** 1 metabolite out of 28 

 4-Pyridoxolactone C<sub>8</sub>H<sub>7</sub>NO<sub>3</sub>

Generate map of **Vitamin B6 metabolism** highlighting potential metabolites.

**alpha-Linolenic acid metabolism:** 1 metabolite out of 39 

 3-Hexenal C<sub>6</sub>H<sub>10</sub>O

Generate map of **alpha-Linolenic acid metabolism** highlighting potential metabolites.

**Maps containing No Compounds from Data Set:** [show](#)

David Leader fecit
